# Supplementary material for: Hypervalent iodine promoted ortho diversification: 2-aryl benzimidazole, quinazoline and imidazopyridine as directing templates
Source: Royal Society of Chemistry journal article supplement (doi:10.1039/c9ob02533b), 2020-01-01

## Hypervalent iodine promoted ortho diversification: 2-aryl benzimidazole, quinazoline and imidazopyridine as directing templates

Moumita Saha, Asish R. Das\*

Department of Chemistry, University of Calcutta, Kolkata-700009, India

\*Corresponding author: Tel.: +913323501014, +919433120265; fax: +913323519754;

E-mail address: ardchem@caluniv.ac.in, ardas66@rediffmail.com (A R Das)

| <b>Contents</b>                                                             | <b>Page no.</b> |
|-----------------------------------------------------------------------------|-----------------|
| X-ray Crystallography data of Compound<br><b>4p</b> and <b>5c</b>           | 2-5             |
| General information                                                         | 5-6             |
| Gram scale synthesis and radical inhibition<br>studies                      | 6-9             |
| Control experiments                                                         | 10-11           |
| Study of Pd-catalyzed C-H activation of 2-<br>methyl benzimidazole          | 11              |
| <sup>1</sup> H, <sup>13</sup> C NMR Spectra of all synthesized<br>compounds | 13-121          |
| HRMS spectra of selected compounds                                          | 122-142         |

**X-ray Crystallography Analysis of Compound 4p and 5c (CCDC 1950069 and 1950441):**

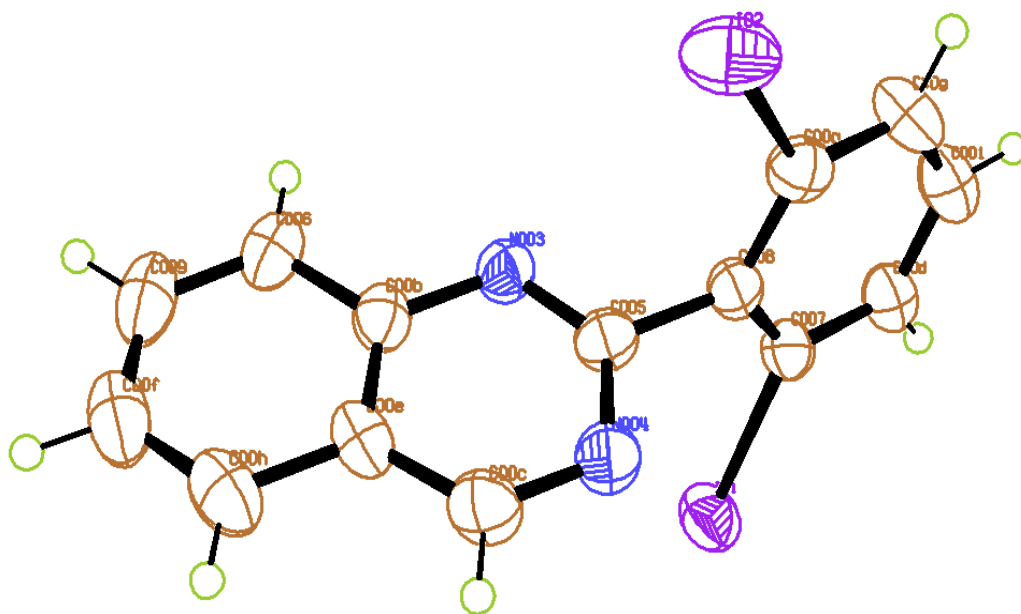

The X-ray structure of **4p**. The ellipsoid contour percent probability level is 50%.

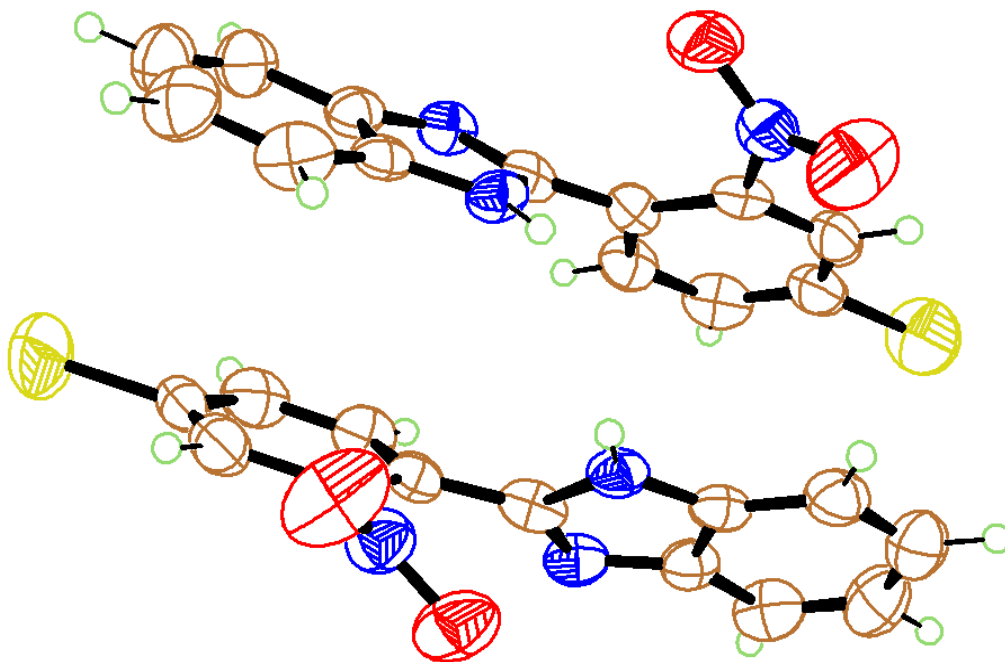

The X-ray structure of **5c**. The ellipsoid contour percent probability level is 50%.

**Single crystal X-ray data for compound 4p and 5c (CCDC 1950069 and 1950441):**

Single crystals suitable for X-ray diffraction of **4p** and **5c** were grown from ethyl acetate and ethanol respectively. The crystals were carefully chosen using a stereo zoom microscope supported by a rotatable polarizing stage. The data were collected at 273(0) K and 296(2) K for **4p** and **5c** on a Bruker-APEX II CCD diffractometer with graphite monochromated Mo-K $\alpha$  radiation (0.71073 Å). The data were processed using the package SAINT.<sup>1</sup> Structures were solved by direct and Fourier methods and refined by full-matrix least squares based on F2 using SHELXTL<sup>2</sup> and SHELXL-97<sup>3</sup> packages.

**Table 1.** Crystallographic data for the compound **4p** and **5c**

| <b>Compounds</b>           | <b>4p</b>                                                    | <b>5c</b>                                                        |
|----------------------------|--------------------------------------------------------------|------------------------------------------------------------------|
| empirical formula          | C <sub>14</sub> H <sub>8</sub> I <sub>2</sub> N <sub>2</sub> | C <sub>13</sub> H <sub>10</sub> Cl N <sub>3</sub> O <sub>2</sub> |
| fw                         | 458.02                                                       | 275.69                                                           |
| crystal color              | clear light yellow                                           | yellow                                                           |
| crystal system             | orthorhombic                                                 | Monoclinic                                                       |
| space group                | P 2ac 2ab                                                    | <i>P-1</i>                                                       |
| <i>a</i> (Å)               | 7.7487(17)                                                   | 7.7529(6))                                                       |
| <i>b</i> (Å)               | 8.3925(19)                                                   | 7.7548(6)                                                        |
| <i>c</i> (Å)               | 21.639(5)                                                    | 23.621(2)                                                        |
| $\alpha$ (°)               | 90.00                                                        | 92.139(5)                                                        |
| $\beta$ (°)                | 90.00                                                        | 91.463(5)                                                        |
| $\gamma$ (°)               | 90.00                                                        | 118.775(3)                                                       |
| <i>V</i> (Å <sup>3</sup> ) | 1407.2(5)                                                    | 1242.40(17)                                                      |

|                                                                          |               |               |
|--------------------------------------------------------------------------|---------------|---------------|
| Z                                                                        | 4             | 4             |
| T, K                                                                     | 273(2)        | 296(2)        |
| Wavelength (Å)                                                           | 0.71073       | 0.71073       |
| 2θ (°)                                                                   | 1.882-27.033  | 0.86-24.90    |
| μ (mm <sup>-1</sup> )                                                    | 4.453         | 0.308         |
| ρ <sub>calcd</sub> (g cm <sup>-3</sup> )                                 | 2.162         | 1.474         |
| F(000)                                                                   | 848           | 568           |
| absorption correction                                                    | multi-scan    | multi-Scan    |
| index ranges                                                             | -9 ≤ h ≤ 9    | -9 ≤ h ≤ 8    |
|                                                                          | -10 ≤ k ≤ 10  | -9 ≤ k ≤ 9    |
|                                                                          | -27 ≤ l ≤ 27  | -27 ≤ l ≤ 27  |
| reflections collected                                                    | 26839         | 15629         |
| independent reflections<br>(R <sub>int</sub> )                           | 9980 (0.0382) | 3165(0.0572)  |
| Goodness-of-fit on F <sup>2</sup>                                        | 1.143         | 2.079         |
| R <sub>1</sub> <sup>a</sup> /wR <sub>2</sub> <sup>b</sup><br>(I > 2σ(I)) | 0.0611/0.1099 | 0.0386/0.0988 |
| R <sub>1</sub> <sup>a</sup> /wR <sub>2</sub> <sup>b</sup> (for all data) | 0.0200/0.0429 | 0.0611/0.1099 |
| Largest diff. peak/hole /<br>e Å <sup>-3</sup>                           | 0.399/ -0.511 | 0.367/ -0.329 |

$${}^a R_1 = [\sum ||F_o| - |F_c|| / \sum |F_o|]. \quad {}^b wR_2 = [\sum w(F_o^2 - F_c^2)^2 / \sum wF_o^4]^{1/2}$$

#### References:

1. *APEX-II, SAINT-Plus, and TWINABS*; Bruker-NoniusAXS Inc.: Madison, WI, 2004.



2. *SHELXTL*, version 6.10; Bruker AXS Inc.: Madison, WI, 2002.
3. Sheldrick, G. M. *SHELXL-97, Crystal Structure Refinement Program*; University of Göttingen: Göttingen, Germany, 1997.
4. Dolomanov, O.V., Bourhis, L.J., Gildea, R.J, Howard, J.A.K. & Puschmann, H. (2009), *J. Appl. Cryst.* 42, 339-341.
5. Sheldrick, G.M. (2015). *Acta Cryst.* A71, 3-8.
6. Sheldrick, G.M. (2015). *Acta Cryst.* C71, 3-8.

**General Information:**

Reactions were monitored by thin-layer chromatography carried out on silica plates using UV-light. Column chromatography was performed on silica gel (100-200 mesh) using hexane and ethyl acetate as eluents. Evaporation of solvents was done under reduced pressure at temperatures less than 60 °C. IR spectra were recorded as neat compounds. <sup>1</sup>H and <sup>13</sup>C NMR spectra were recorded using DMSO-*d*<sub>6</sub> and CDCl<sub>3</sub> solvents respectively on a 300, 400, 500 and 600 and 75, 100, 150 MHz spectrometer where tetramethylsilane (TMS) was used as internal standard. Chemical shifts  $\delta$  and coupling constants *J* are given in ppm (parts per million) and Hz (hertz) respectively. Proton coupling patterns are described as singlet (s), doublet (d), triplet (t), quartet (q), multiplet (m), doublet of doublets (dd). HRMS data were recorded by Waters Xevo G-2 SQ TOF electrospray ionization mass spectrophotometer. Suitable single crystals of compounds **4p** and **5c** were mounted on a Bruker--APEX II CCD X-ray diffractometer with graphite monochromated Mo-K $\alpha$  radiation (0.71073 Å). Melting points were measured on a Köfler Block apparatus. All solvents were obtained from commercial sources and were purified and dried using standard procedure prior to use. Commercially available iodobenzene diacetate, Cs<sub>2</sub>CO<sub>3</sub>, Iodine, NaNO<sub>2</sub> were used without further purification.

### Synthesis of product **2a** from 2-substituted benzimidazole (**1a**) in gram scale:

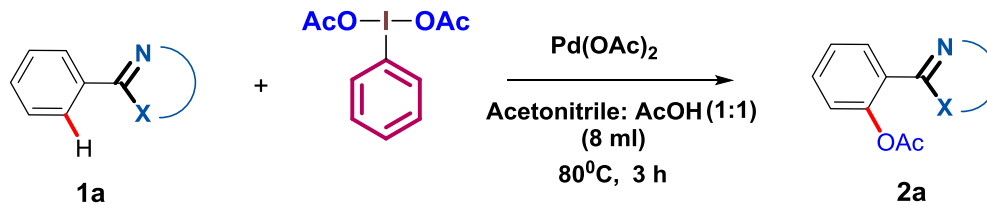

An oven-dried 25 mL round bottom flask fitted with CaCl<sub>2</sub> guard tube was charged with 2-phenyl benzimidazole (**1a**) (1.164 g, 6.0 mmol), Pd(OAc)<sub>2</sub> (135 mg, 0.6 mmol), PIDA (5.80 g, 18 mmol) in 8 mL dry acetonitrile: acetic acid (1:1 v/v). The reaction mixture was refluxed in a pre-heated oil bath to 80 °C under air for 3h. After being cooled at room temperature, the reaction mixture was neutralized with sat. NaHCO<sub>3</sub> solution (30 mL) and extracted with ethyl acetate (3 x 40mL). The combined organic layer was washed with brine, dried over anhydrous sodium sulphate, evaporated under reduced pressure and purified using silica gel column chromatography (100-200 mesh size) (hexane/ethyl acetate, 2:1) to give pure 2-(1H-benzo[d]imidazol-2-yl)phenyl acetate (**2a**) (1.20 g, yield 80%).

### Synthesis of compound **2a** in the presence of radical inhibitor TEMPO:

An oven-dried 10 mL round bottom flask fitted with CaCl<sub>2</sub> guard tube was charged with 2-phenyl benzimidazole (**1a**) (97 mg, 0.5 mmol), Pd(OAc)<sub>2</sub> (12 mg, 0.05 mmol), PIDA (483.18 mg, 1.5 mmol), TEMPO (156 mg, 2.0 mmol) in 2 mL dry acetonitrile: acetic acid (1:1 v/v). The reaction mixture was refluxed in a pre-heated oil bath to 80 °C under air for 3h. After being cooled at room temperature, the reaction mixture was neutralized with sat. NaHCO<sub>3</sub> solution (5 mL) and extracted with ethyl acetate (3 x 10mL). The combined organic layer was washed with brine, dried over anhydrous sodium sulphate, evaporated under reduced pressure and then purified using silica gel column chromatography (100-200 mesh size) (hexane/ethyl acetate, 2:1) to give pure 2-(1H-benzo[d]imidazol-2-yl)phenyl acetate (**2a**) (0.102 g, yield 81%).

### Synthesis of compounds (**3a**) from 2-substituted benzimidazole in gram scale:

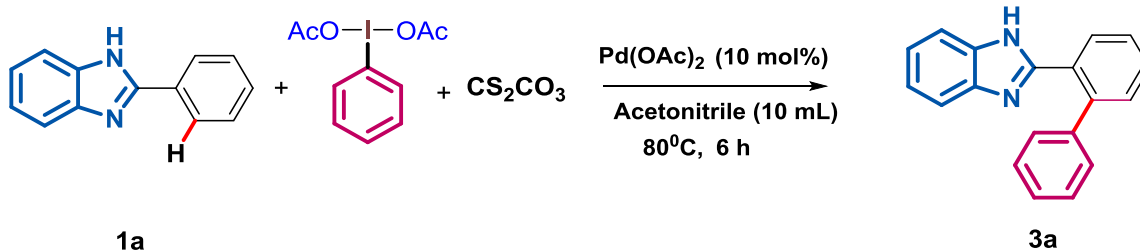

An oven dried 25 mL round bottom flask fitted  $\text{CaCl}_2$  guard tube with was charged with 2-phenyl benzimidazole **1a** (1.164g, 6.0 mmol),  $\text{Pd}(\text{OAc})_2$  (0.135 g, 0.6 mmol), PIDA (2.90 g, 9.0 mmol) and  $\text{Cs}_2\text{CO}_3$  (3.91 g, 12 mmol) in dry acetonitrile (10 mL) under air atmosphere. The mixture was stirred at room temperature for 5 min for proper mixing of the reactants, and then heated in a preheated oil bath to  $80^\circ\text{C}$  for 6 h (monitored by TLC). The progress of the reaction was monitored by TLC. Upon completion, the reaction mixture was cooled to room temperature, diluted with ethyl acetate and filtered through a pad of Celite. The filtrate was then concentrated under reduced pressure and the crude residue was purified by silica gel column chromatography (100-200 mesh size) using eluent (EtOAc/petroleum ether,1:3) to afford the desired product **3a** (1.3 g, 80 %).

### Synthesis of compound **3a** in the presence of radical inhibitor TEMPO

An oven dried 10 mL round bottom flask fitted  $\text{CaCl}_2$  guard tube with was charged with 2-phenyl benzimidazole **1a** (94 mg, 0.5 mmol),  $\text{Pd}(\text{OAc})_2$  (12 mg, 10 mol %), PIDA (241.6 mg, 1.5 mmol),  $\text{Cs}_2\text{CO}_3$  (326 mg, 2.0 mmol), TEMPO (156 mg, 1.0 mmol) in dry acetonitrile (2.0 mL) under air. The mixture was stirred at room temperature for 5 min. for proper mixing of the reactants, and then heated in a preheated oil bath to  $80^\circ\text{C}$  for 6h. The progress of the reaction was monitored by TLC. Upon completion, the reaction mixture was cooled to room temperature, diluted with ethyl acetate and filtered through a small pad of Celite. The filtrate was concentrated under reduced

pressure and the crude residue was purified by silica gel column chromatography (100-200 mesh size) using eluent (EtOAc/petroleum ether, 1:3) to afford the desired product **3a** (107 mg, 79%).

#### Synthesis of compound **4a** from **1a** in gram scale:

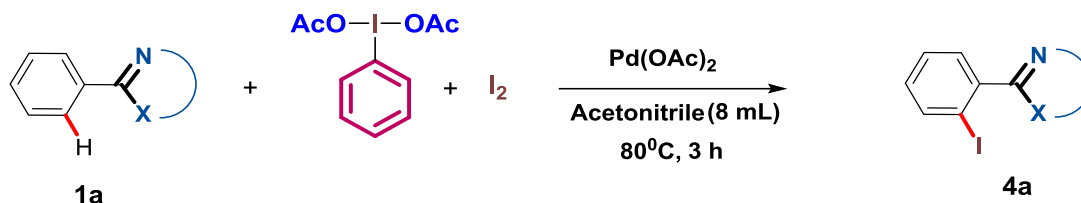

An oven-dried 25 mL round bottom flask fitted with CaCl<sub>2</sub> guard tube was charged with 2-phenyl benzimidazole **1a** (1.164 g, 6.0 mmol), Pd(OAc)<sub>2</sub> (0.135 g, 0.6 mmol), PIDA (2.90 g, 9.0 mmol) and I<sub>2</sub> (2.28 g, 9.0 mmol) in 8 mL dry acetonitrile. The reaction mixture was refluxed in a pre-heated oil bath to 80°C for 3h (the progress of reaction monitored by TLC). After being cooled the reaction mixture at room temperature, the excess iodine was quenched using 30% Na<sub>2</sub>S<sub>2</sub>O<sub>3</sub> solution (30 mL), washed with brine and extracted with ethyl acetate (3 x 40 ml). The combined organic part was dried over anhydrous sodium sulphate, concentrated under reduced pressure and finally purified using silica gel column chromatography (100-200 mesh size) (hexane/ethyl acetate, 3:1) to afford 2-(2-iodophenyl)-1H-benzo[d]imidazole (**4a**) (1.67 g, yield 87%). The identity and purity of the product was confirmed by spectroscopic analysis.

#### Synthesis of compound **4a** in the presence of radical inhibitor TEMPO

To an oven-dried 10 mL round bottom flask fitted with CaCl<sub>2</sub> guard tube were added 2-phenyl benzimidazole (**1a**) (97 mg, 0.5 mmol), Pd(OAc)<sub>2</sub> (12 mg, 0.05 mmol), PIDA (241.5 mg, 1.5 mmol), I<sub>2</sub> (189.75 gm, 1.5 mmol) and TEMPO (156 mg, 1.0 mmol) in 2 mL dry acetonitrile. The reaction mixture was refluxed in a pre-heated oil bath to 80°C for 3h. After completion of reaction, the reaction mixture was cooled to room temperature and excess iodine was quenched using 30% sodium thiosulfate solution (5 mL). After this the mixture was extracted with ethyl acetate (3 x 10

mL), washed with brine and the combined organic layer was dried over anhydrous sodium sulphate, concentrated under reduced pressure and purified using column chromatography (100-200 mesh size) (hexane/ethyl acetate, 3:1) and 2-(2-iodophenyl)-1*H*-benzo[*d*]imidazole (**4a**) was isolated with 88% (0.141 g).

### Synthesis of compound **5a** from **1a** in gram scale.

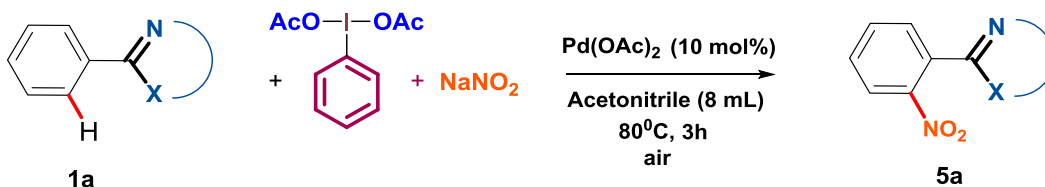

An oven dried 25 ml round bottom flask equipped with a CaCl<sub>2</sub> guard tube was charged with **1a** (1.164 g, 6.0 mmol), Pd(OAc)<sub>2</sub> (0.135 g, 0.6 mmol), PIDA (2.90 g, 9.0 mmol) and sodium nitrite (0.621 g, 9.0 mmol) in 8 mL dry acetonitrile and refluxed in a pre-heated oil bath under air for 3h. After being stirred for appropriate time, the reaction mixture was cooled to room temperature, the solvent was distilled under vacuum. The resulting mixture was directly charged on silica gel column chromatography (100-200 mesh size) (petroleum ether/ethyl acetate=2:1) to isolate pure 2-(2-nitrophenyl)-1*H*-benzo[*d*]imidazole (**5a**) (1.32g, 92%) as a yellow solid. The identity and purity of the product was confirmed by spectroscopic analysis.

### Synthesis of compound **5a** in the Presence of radical inhibitor TEMPO

To an oven-dried 10 mL round bottom flask fitted with CaCl<sub>2</sub> guard tube were added 2-phenyl benzimidazole (**1a**) (97 mg, 0.5 mmol), Pd(OAc)<sub>2</sub> (12 mg, 0.05 mmol), PIDA (241.5 mg, 1.5 mmol), NaNO<sub>2</sub> (51.7 mg, 1.5 mmol) and TEMPO (156 mg, 1.0 mmol) in 2 mL dry acetonitrile. The reaction mixture was refluxed in a pre-heated oil bath to 80°C for 3h. After completion of the reaction, excess solvent was evaporated under reduced pressure and the resulting mixture then

directly loaded on silica gel column chromatography (100-200 mesh size) (hexane/ethyl acetate, 3:1) and 2-(2-nitrophenyl)-1*H*-benzo[*d*]imidazole (**5a**) was isolated with 6% (7 mg).

## Scheme 4: Control experiments

(a) Studies on selectivity of mono or di-functionalisation

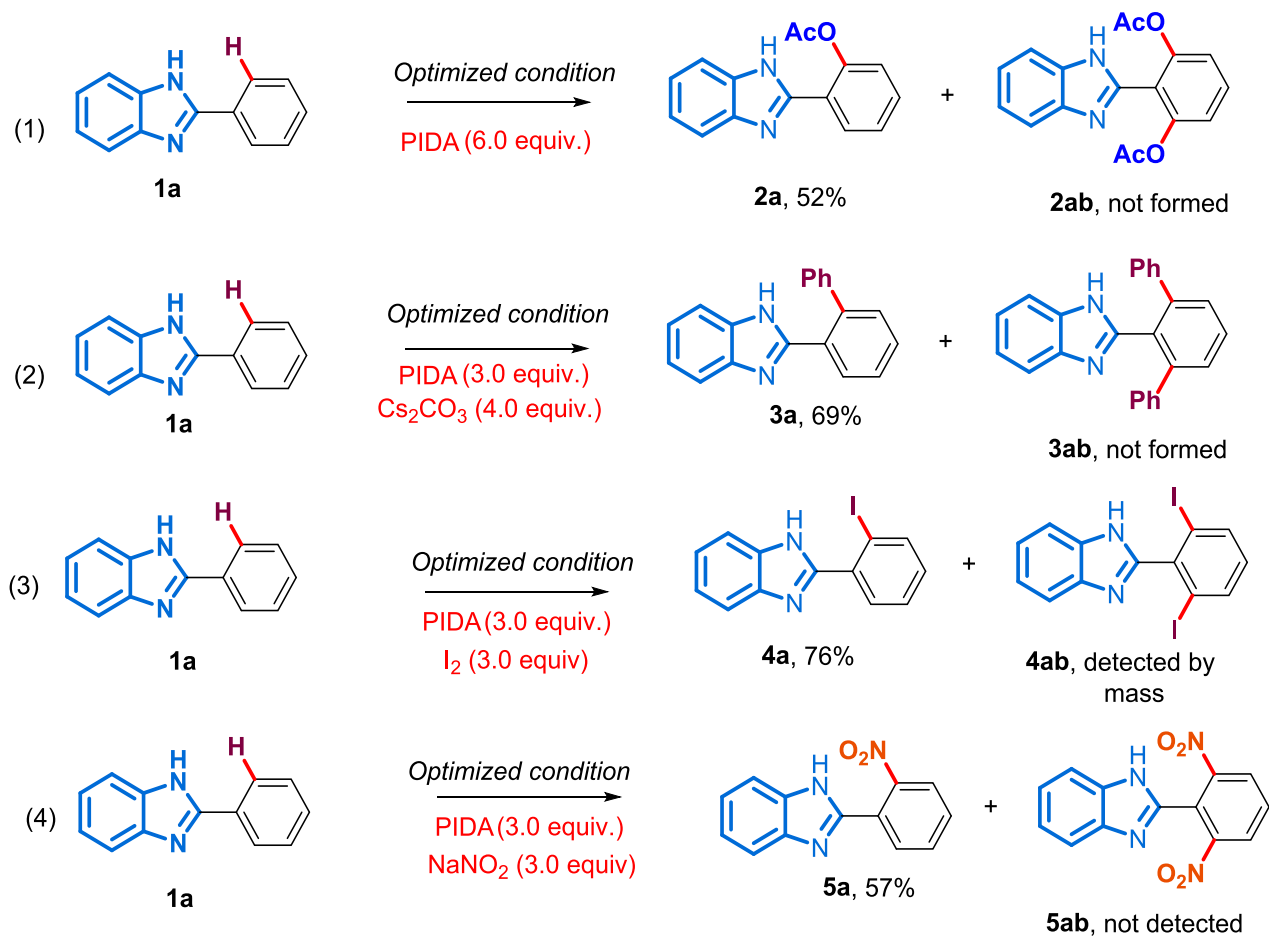

(b) Radical inhibition studies

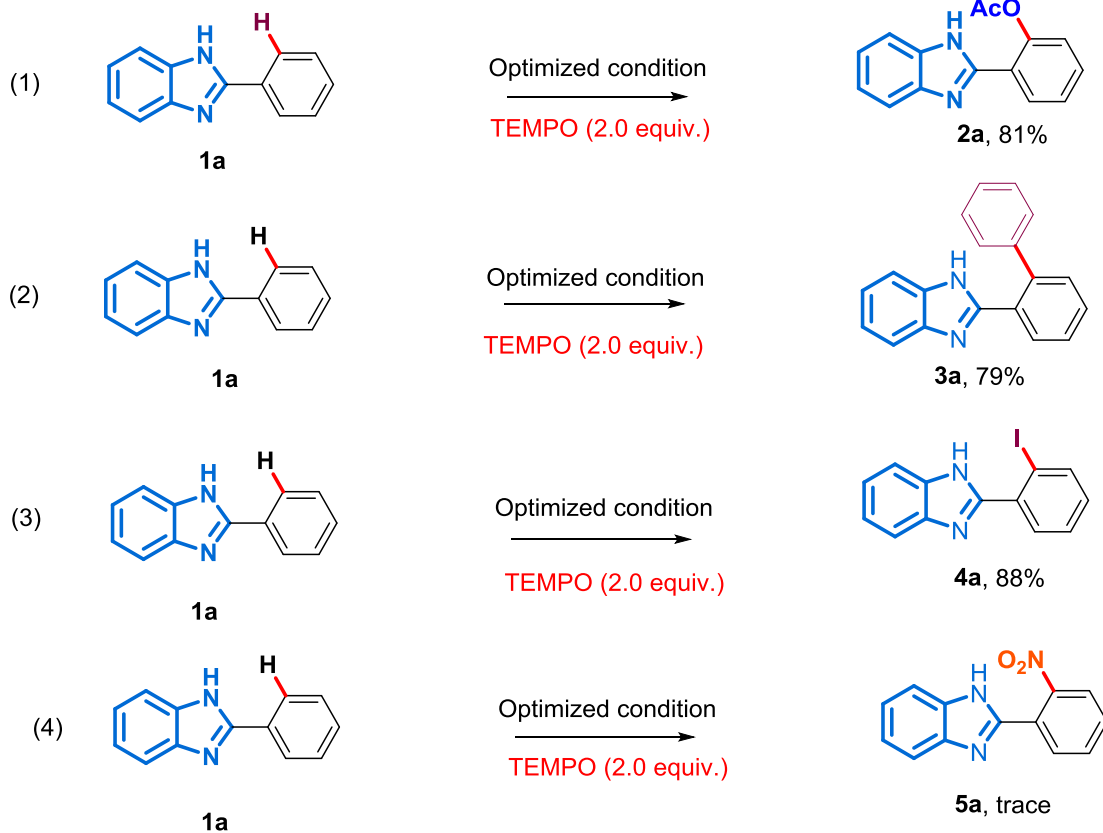

Scheme 5: Pd-catalyzed C-H activation of 2-methylbenzimidazole

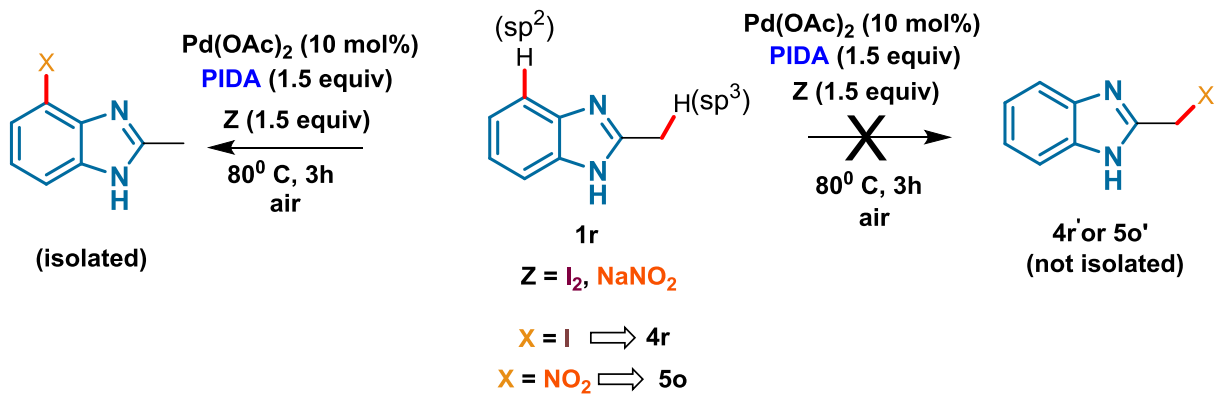

# $^1\text{H}$ NMR of Compound 2a

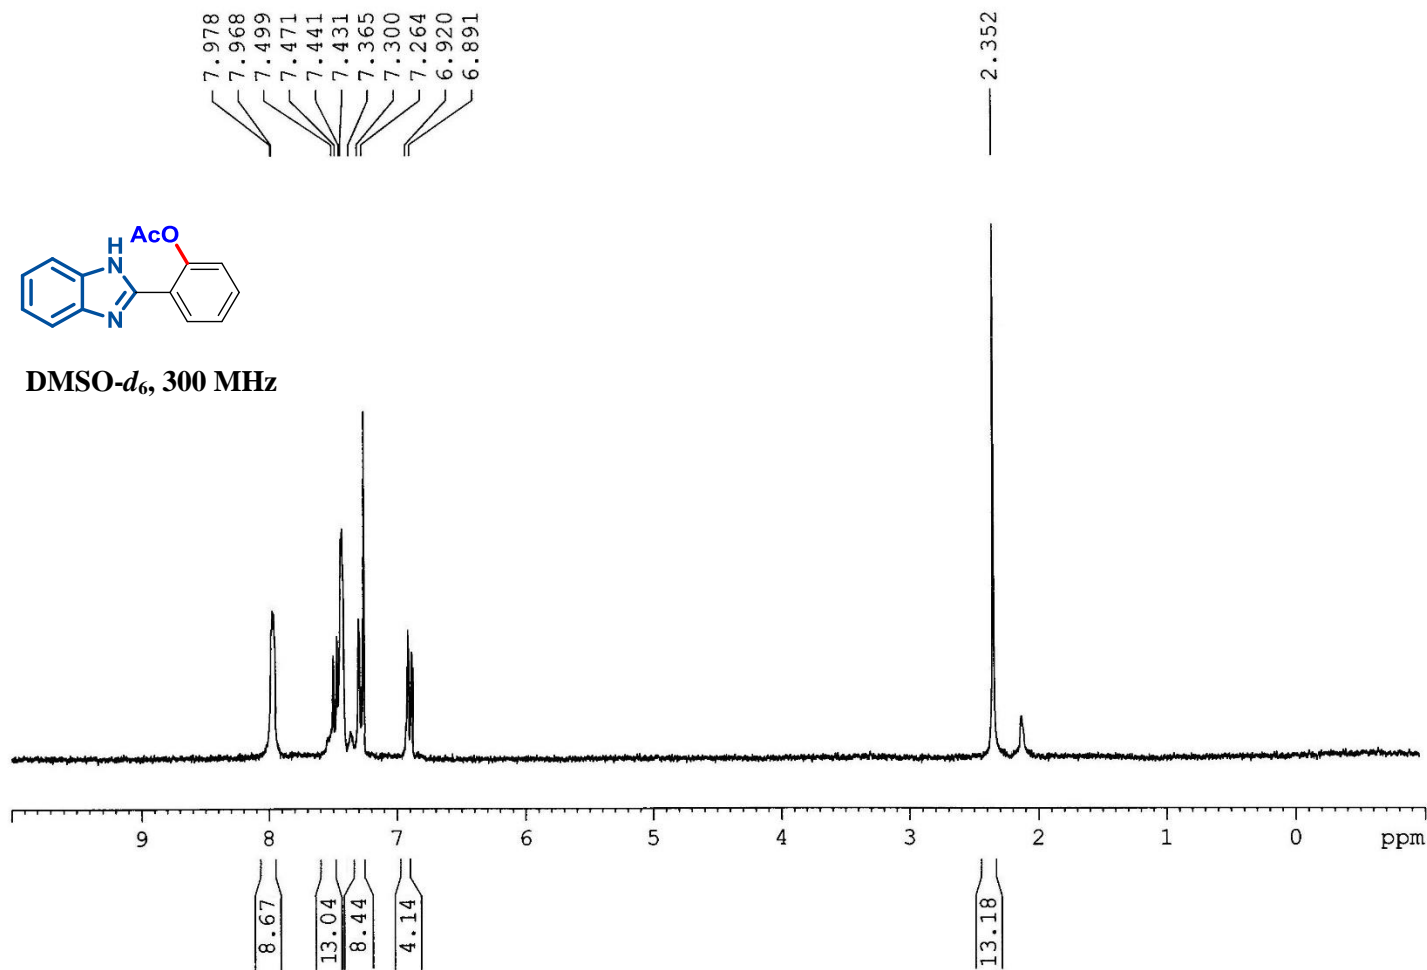



# $^{13}\text{C}$ NMR of Compound 2a

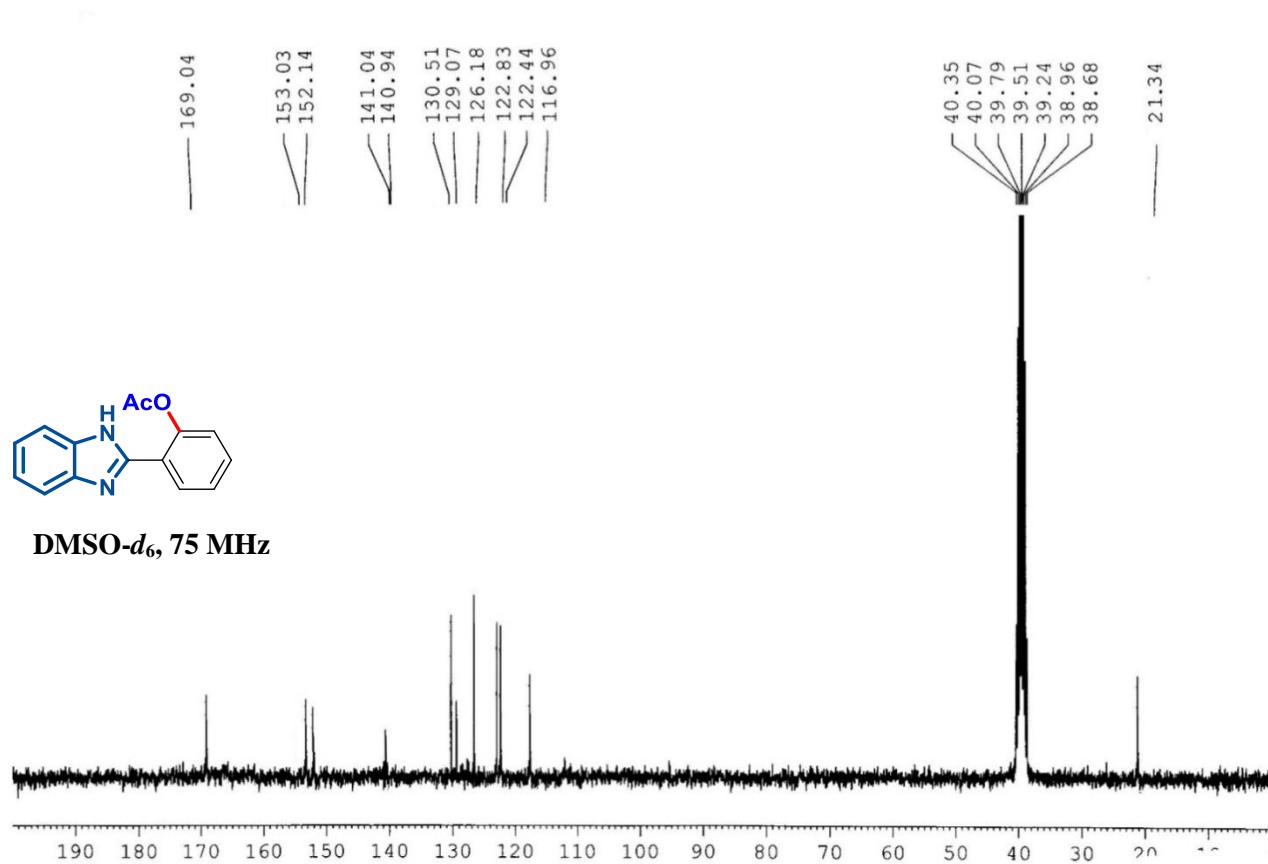

# <sup>1</sup>H NMR of Compound 2b

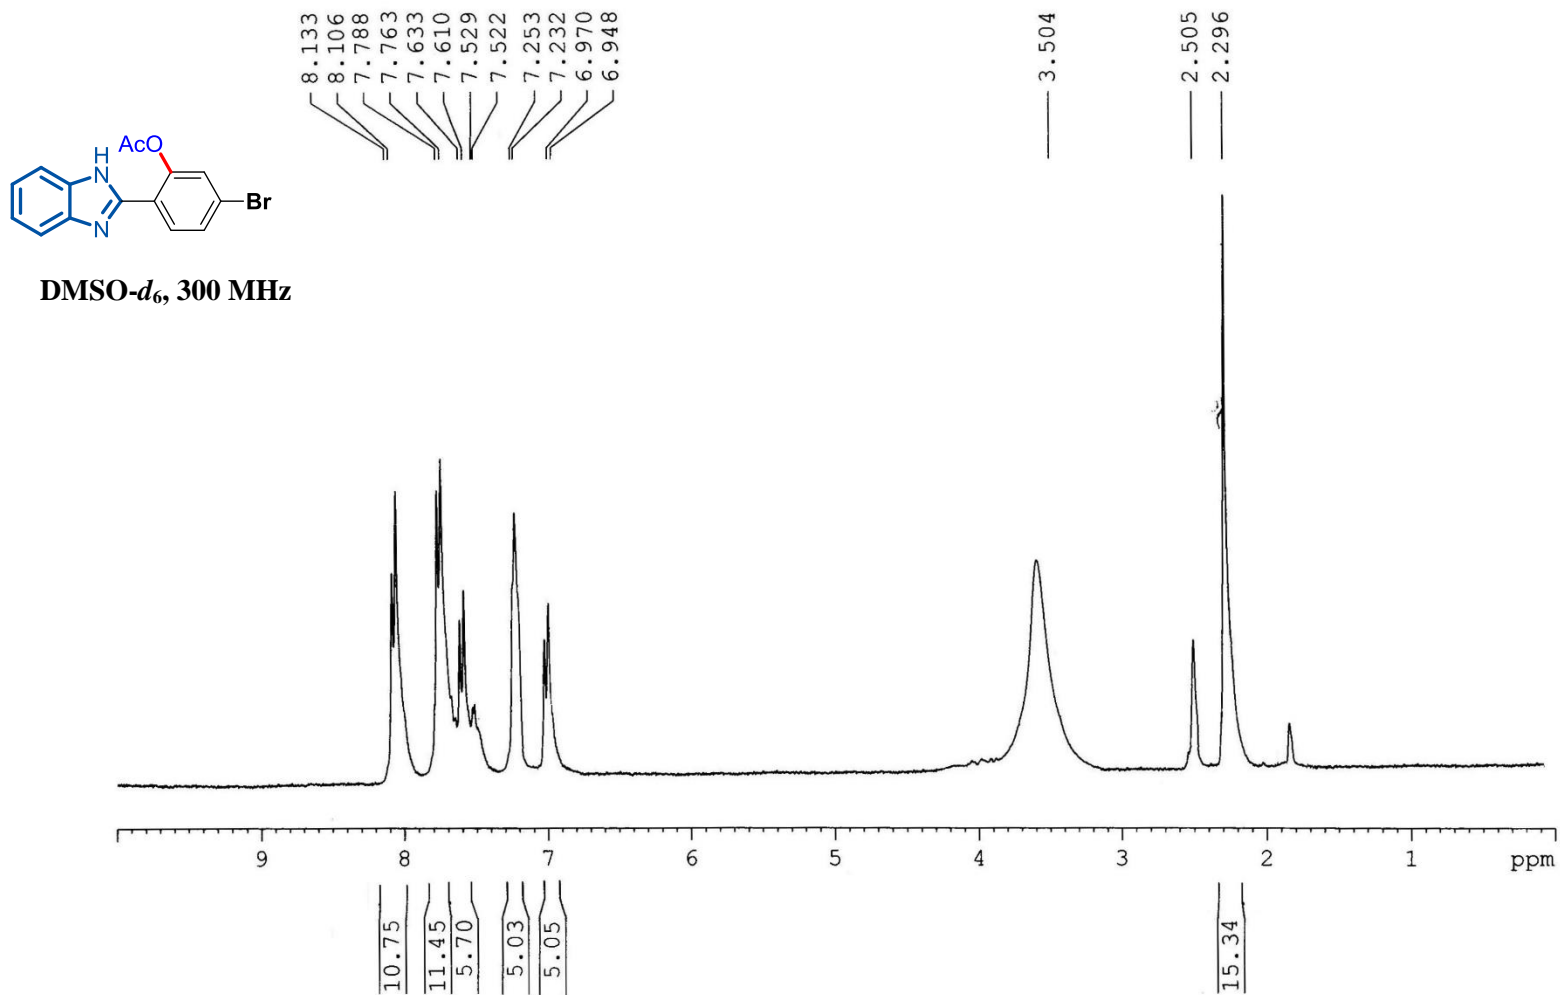

# $^{13}\text{C}$ NMR of Compound 2b

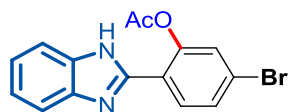

DMSO- $d_6$ , 75 MHz

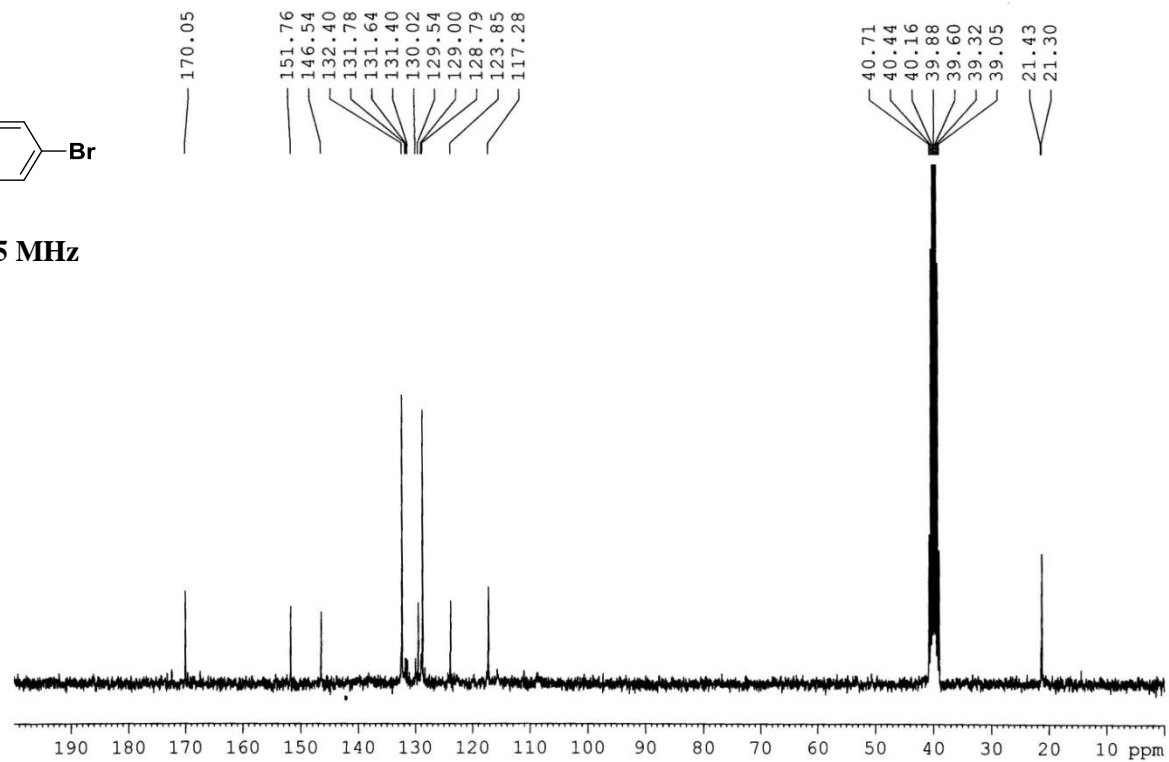

# <sup>1</sup>H NMR of Compound 2c

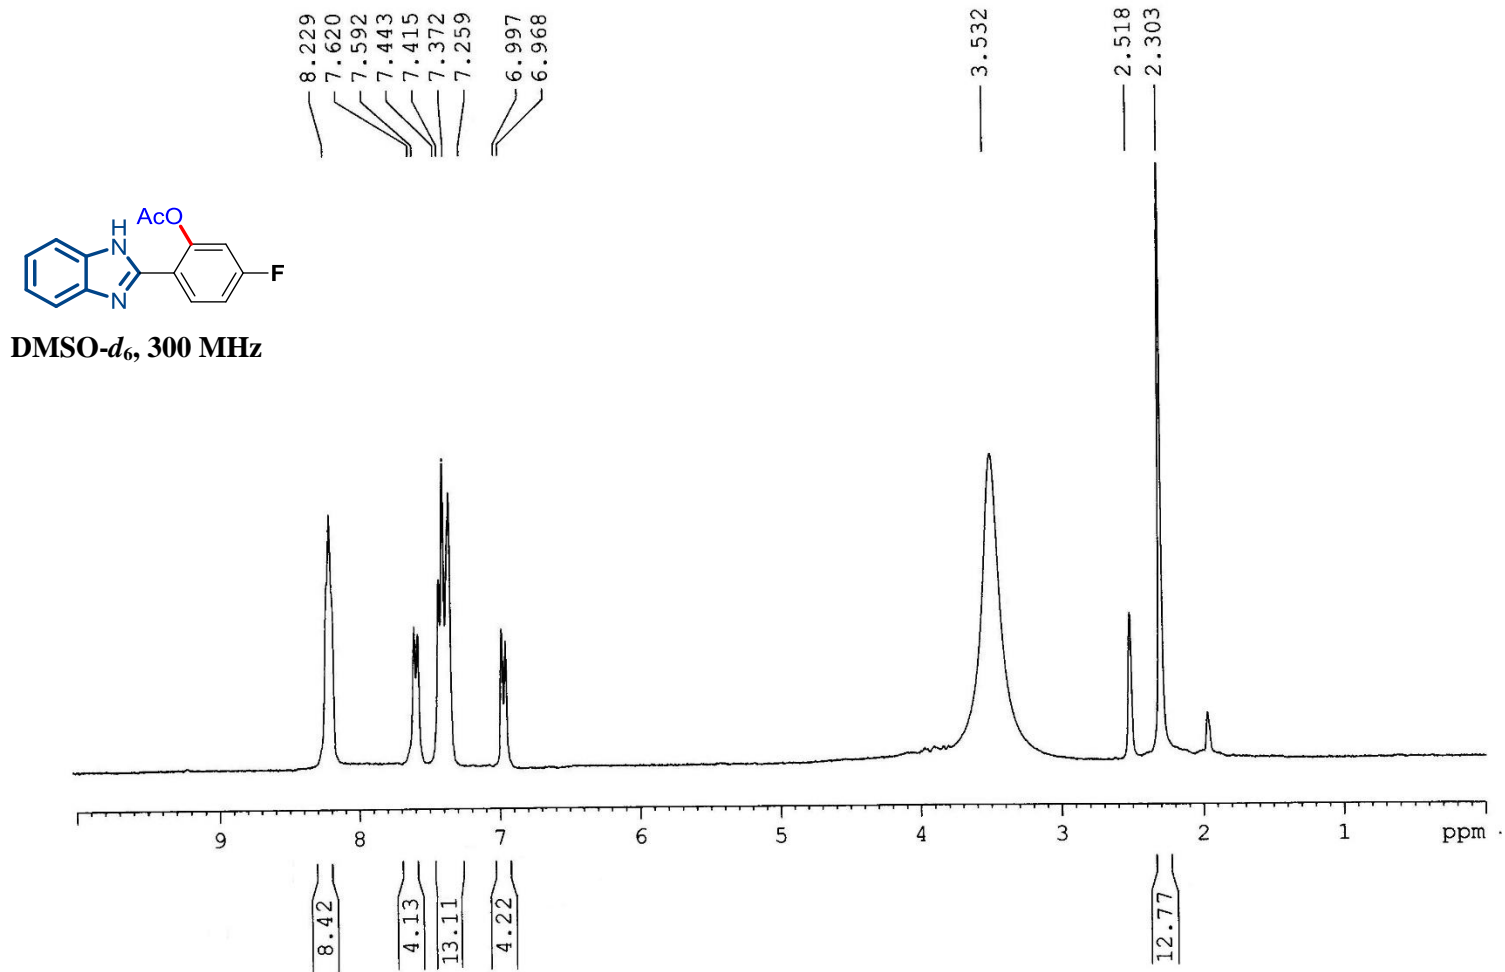

# $^{13}\text{C}$ NMR of Compound 2c

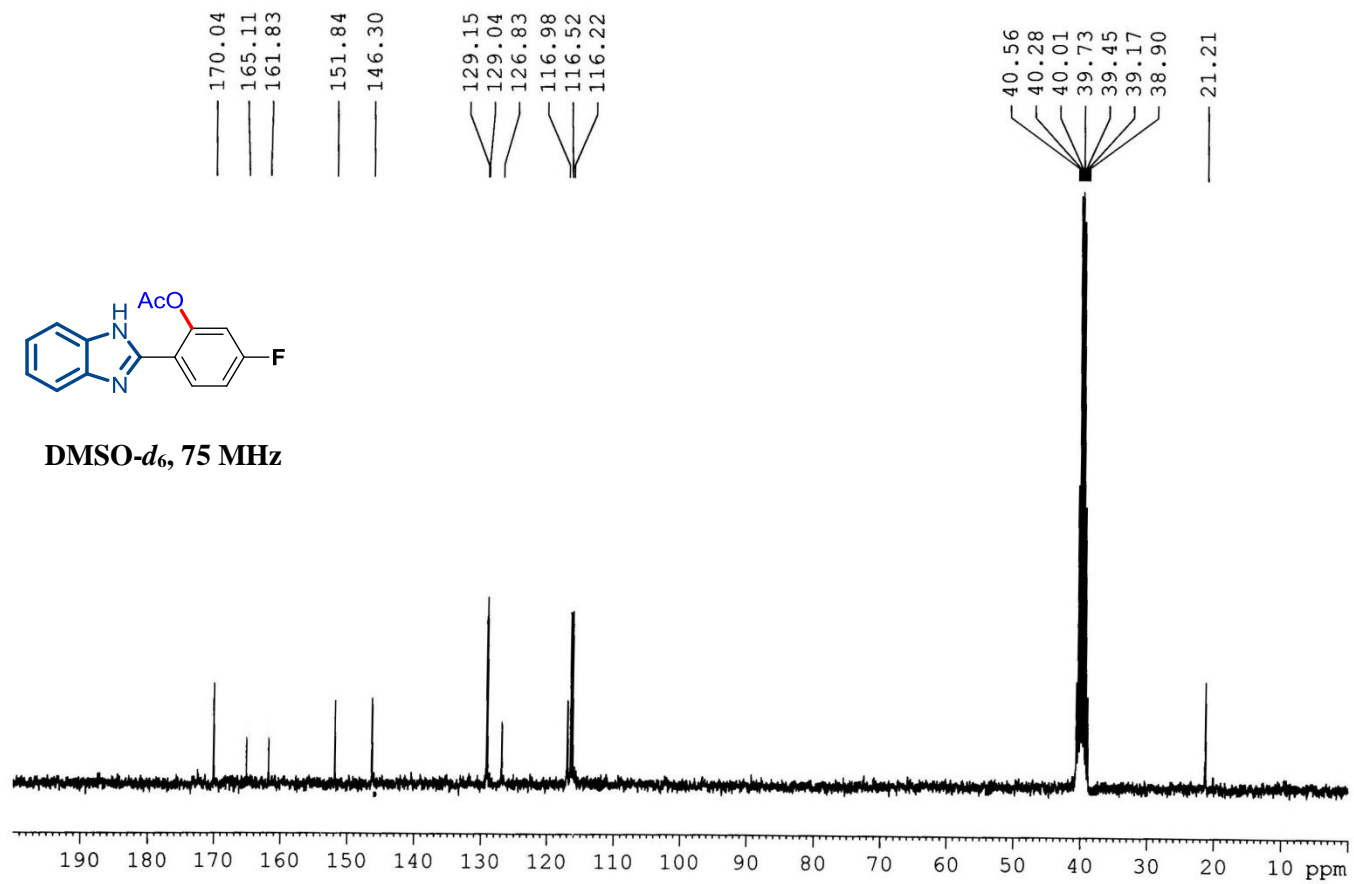

# <sup>1</sup>H NMR of Compound 2d

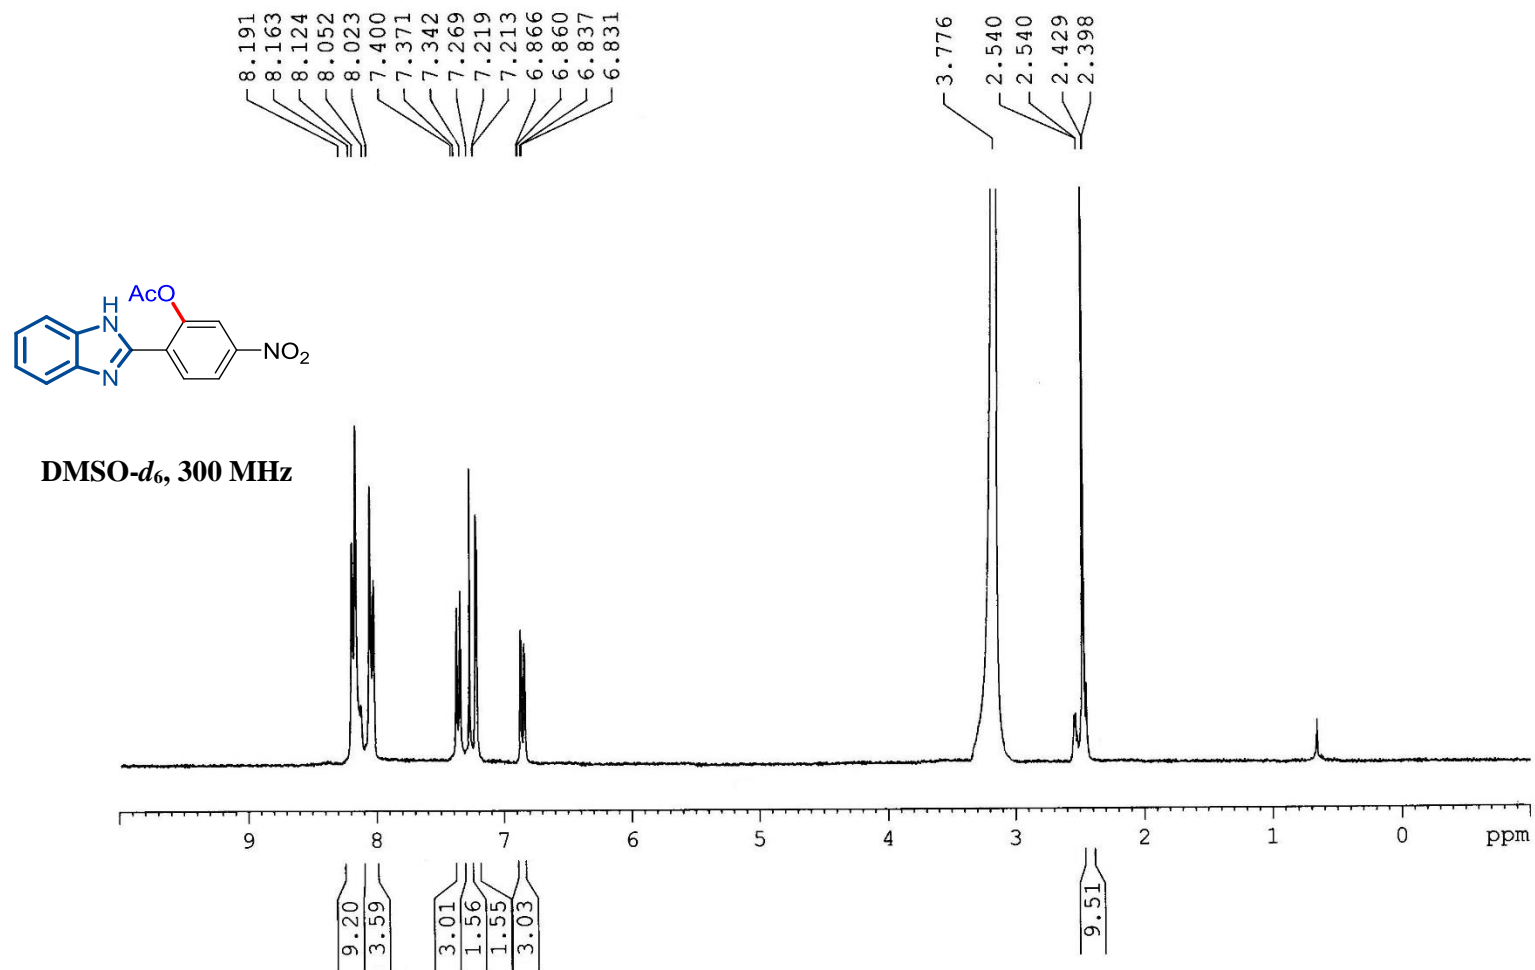

# $^{13}\text{C}$ NMR of Compound 2d

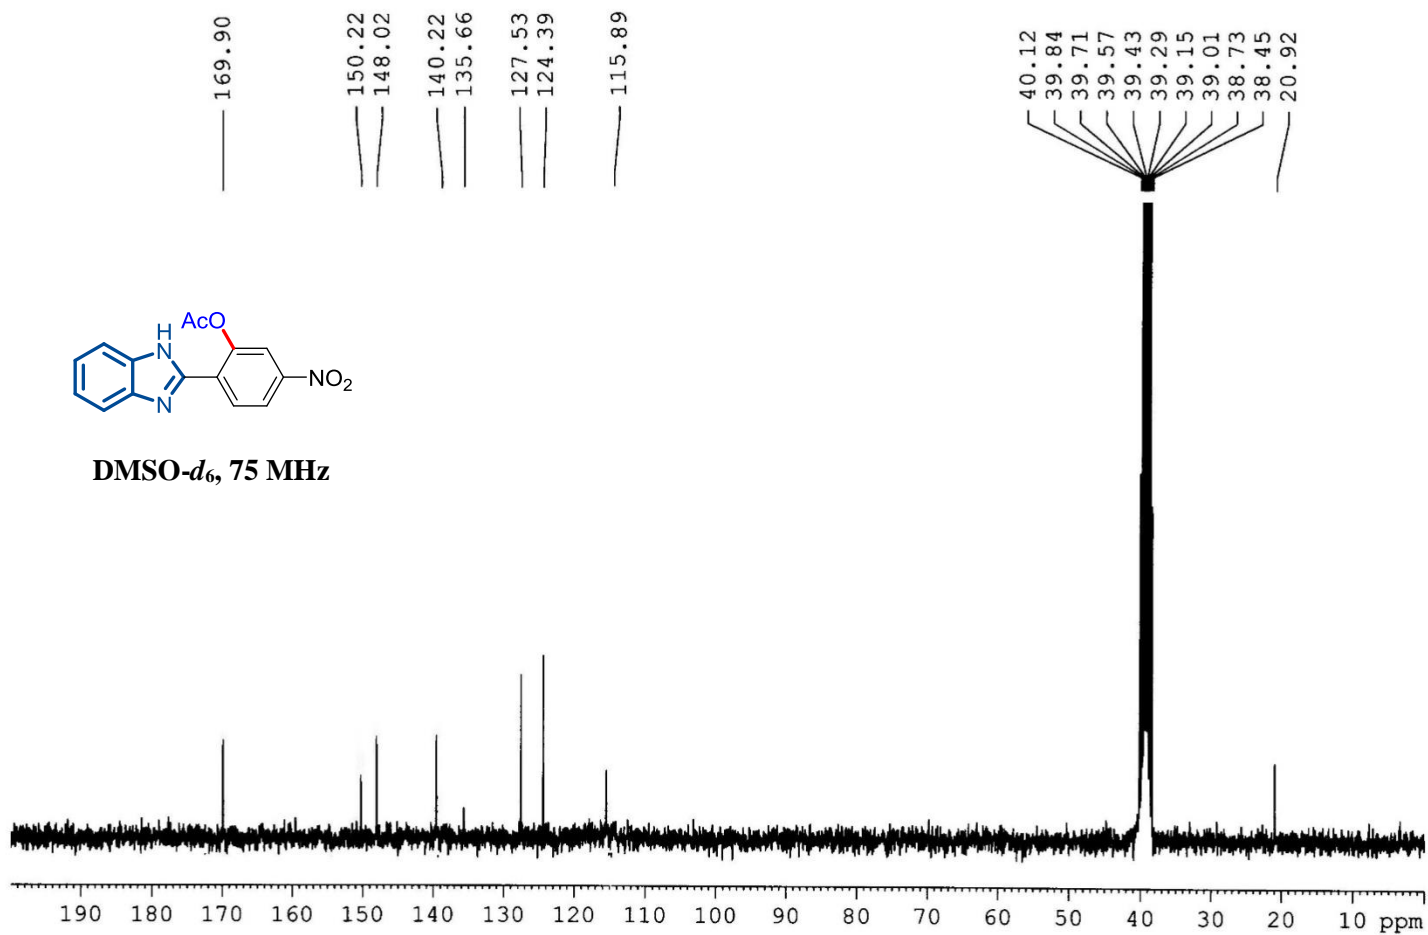

# <sup>1</sup>H NMR of Compound 2e

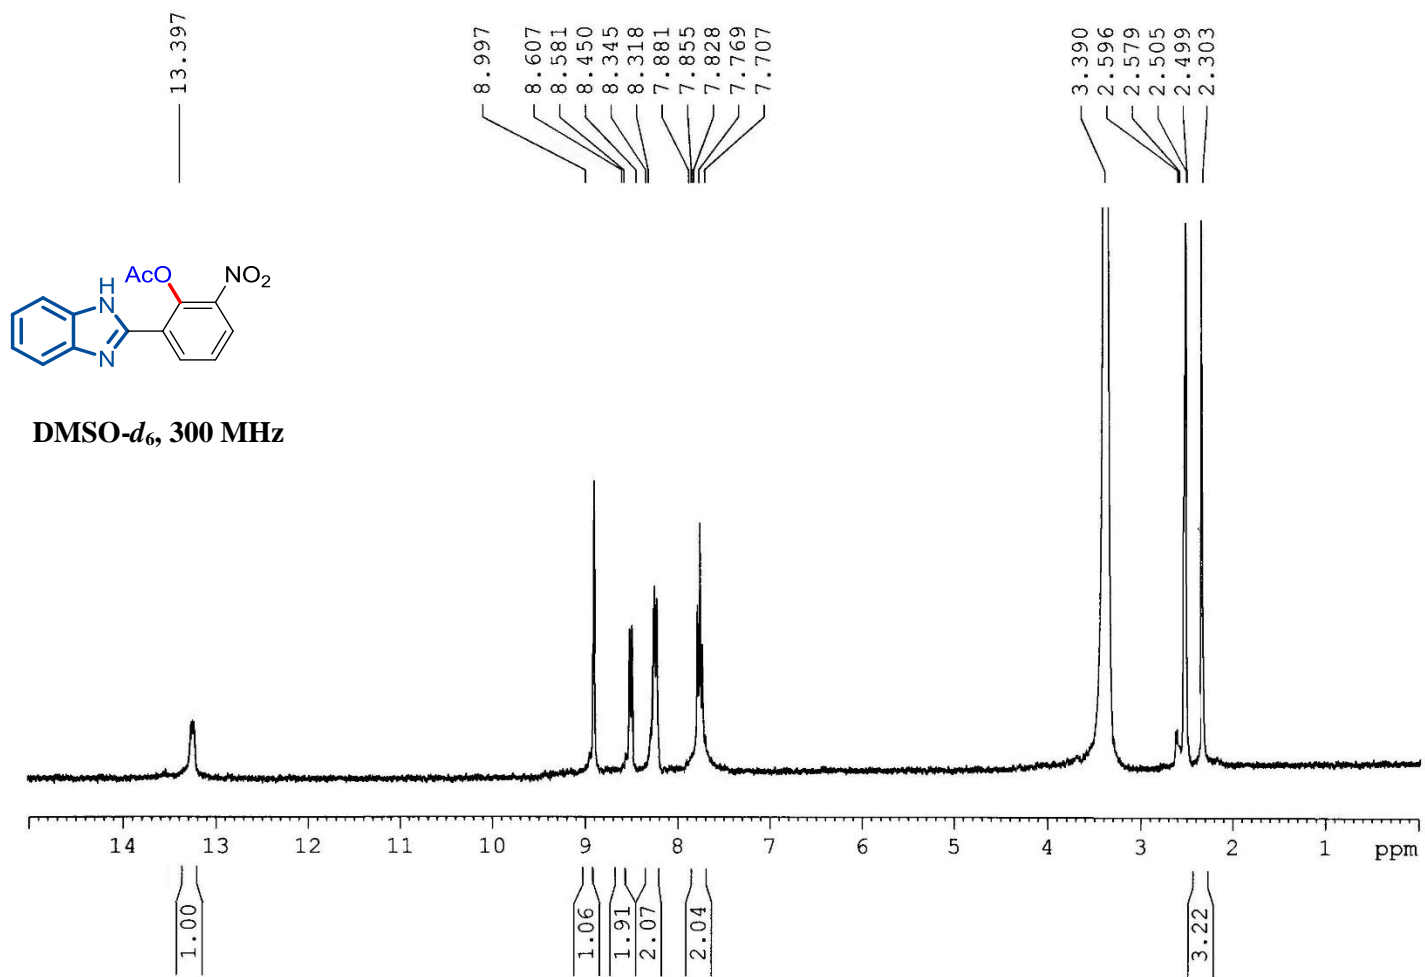



# <sup>13</sup>C NMR of Compound 2e

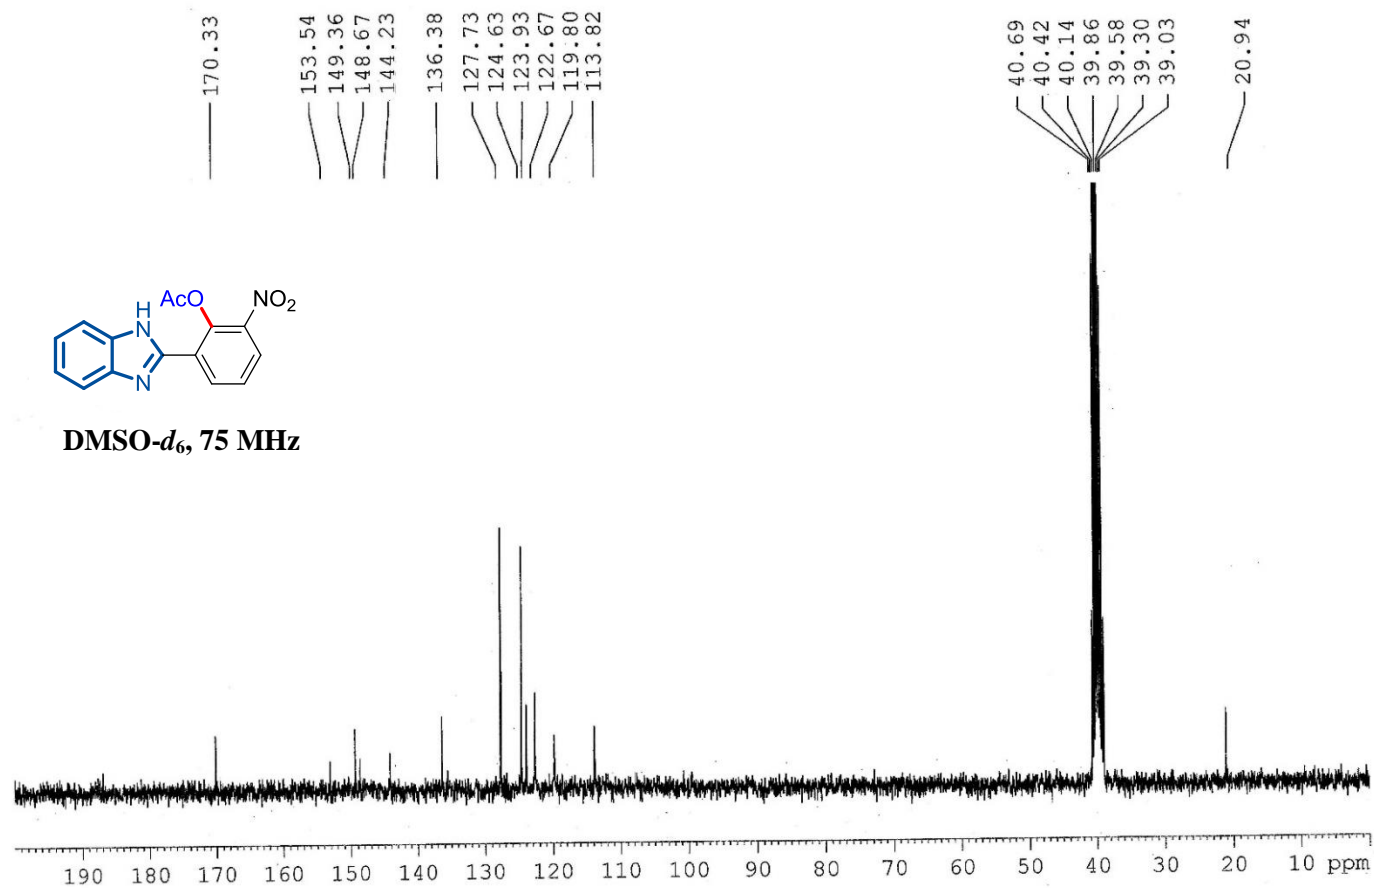

# <sup>1</sup>H NMR of Compound 2f

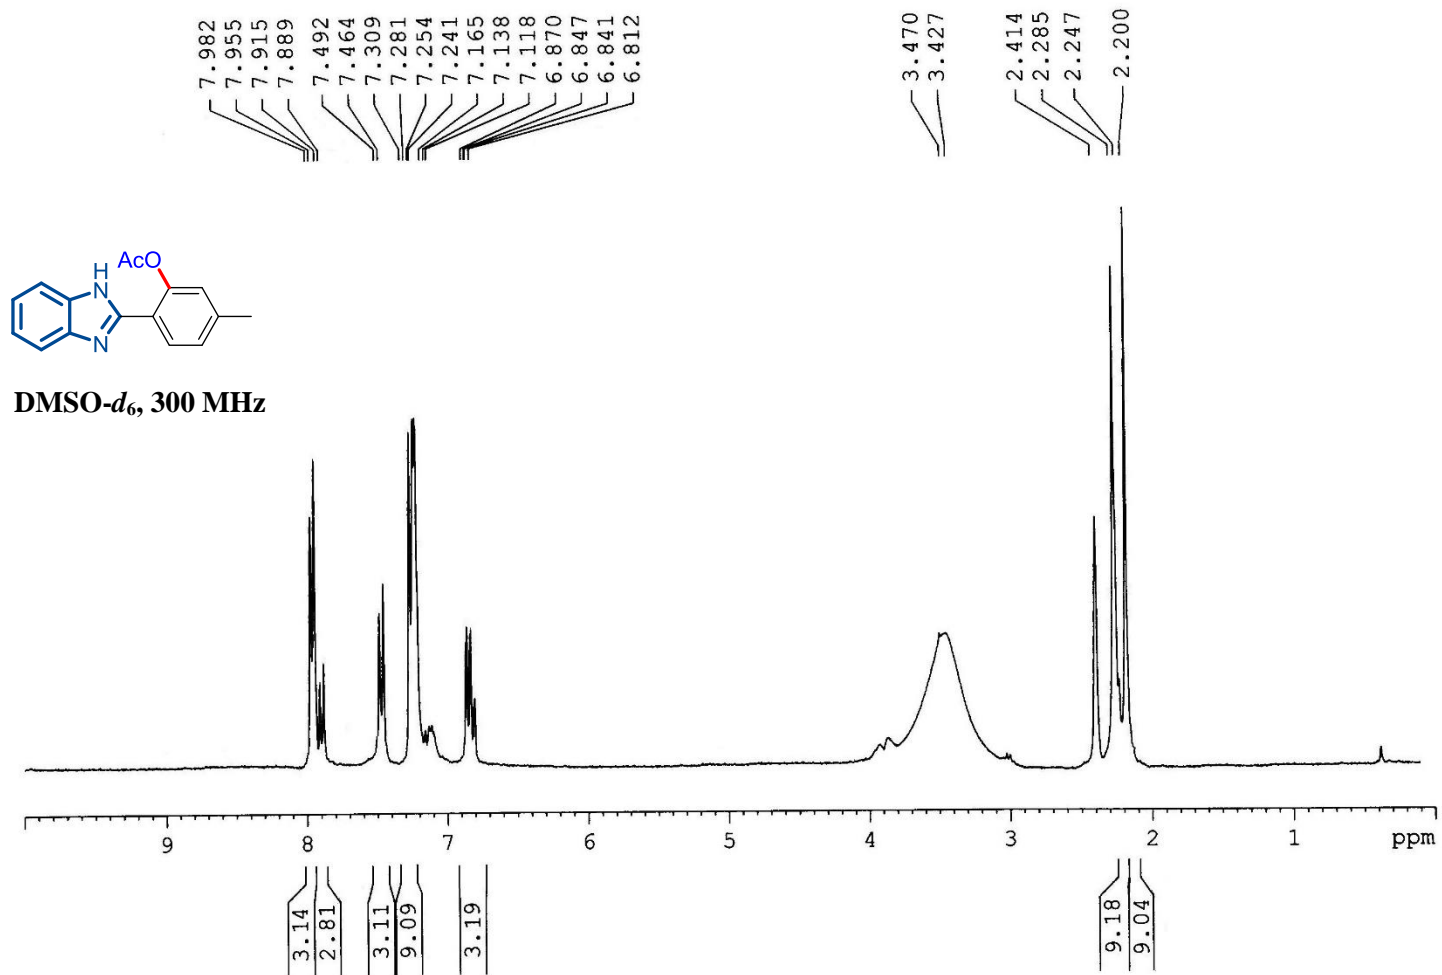

# <sup>13</sup>C NMR of Compound 2f

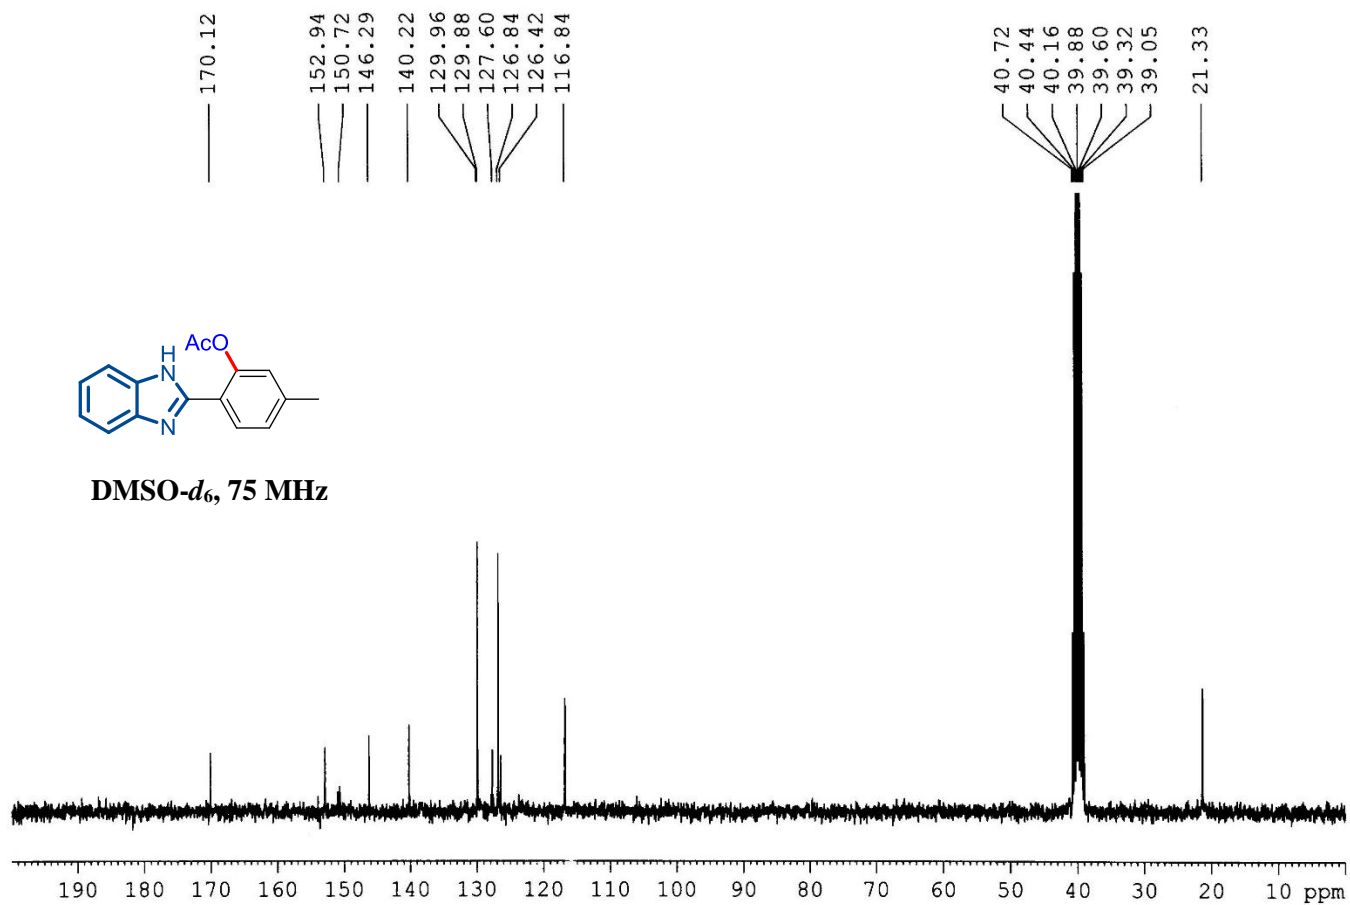

# <sup>1</sup>H NMR of Compound 2g

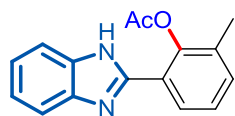

DMSO-*d*<sub>6</sub>, 300 MHz

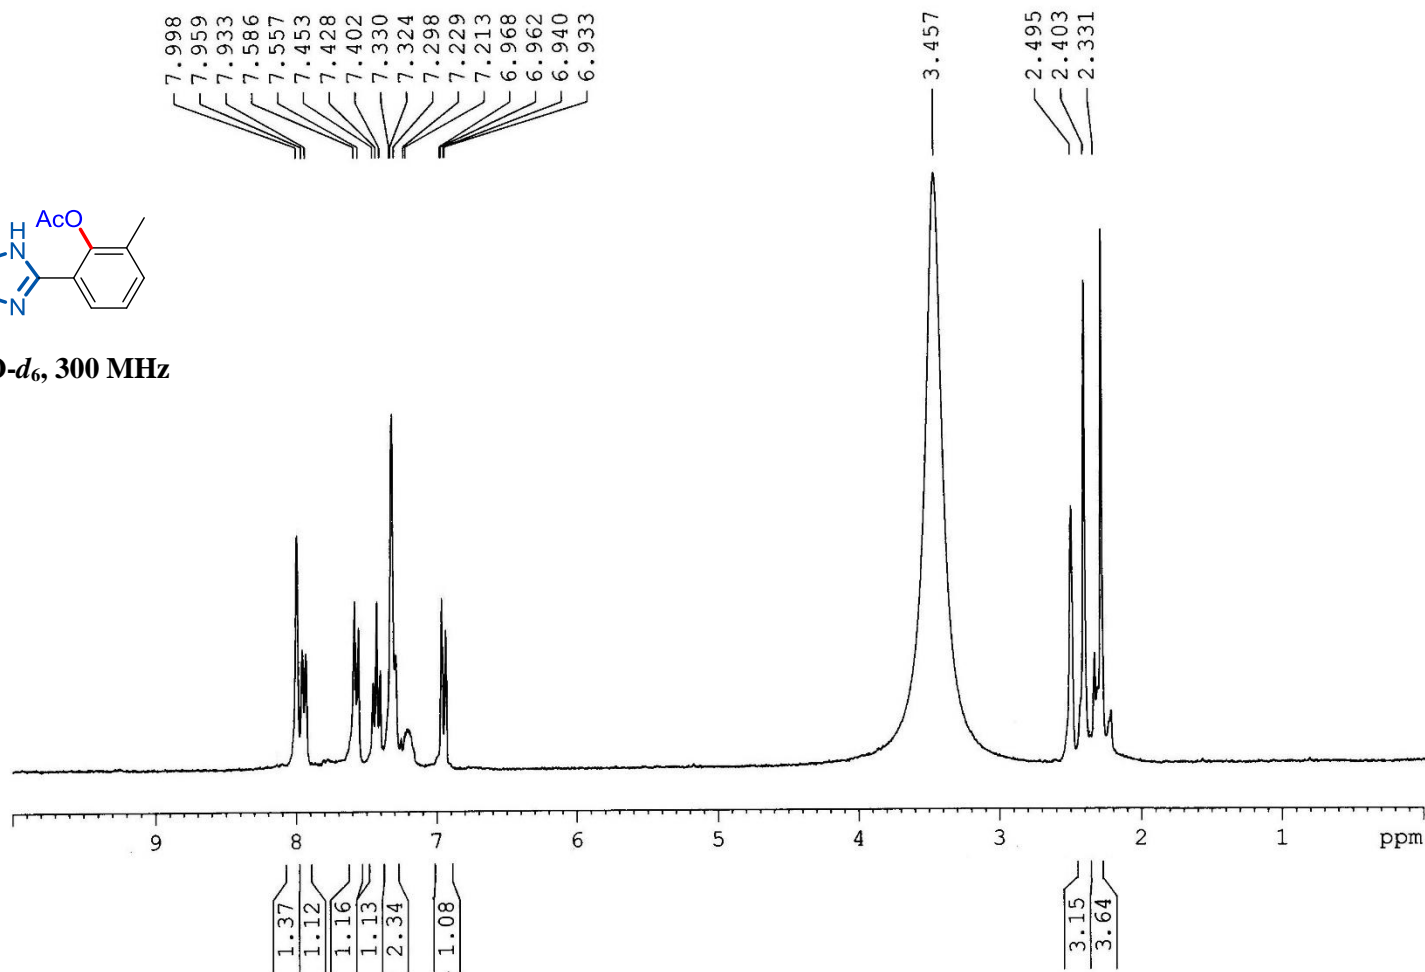

# <sup>13</sup>C NMR of Compound 2g

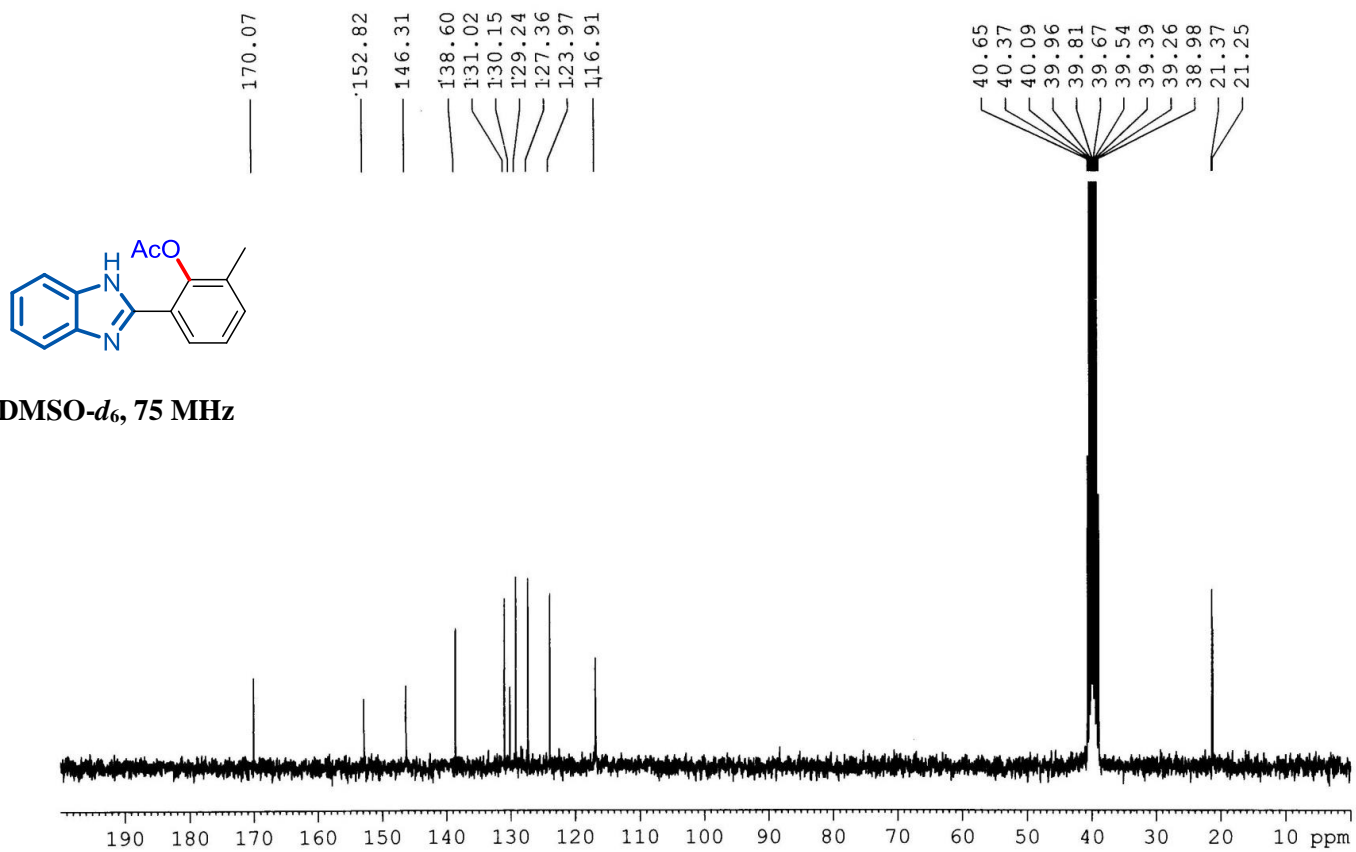

# <sup>1</sup>H NMR of Compound 2h

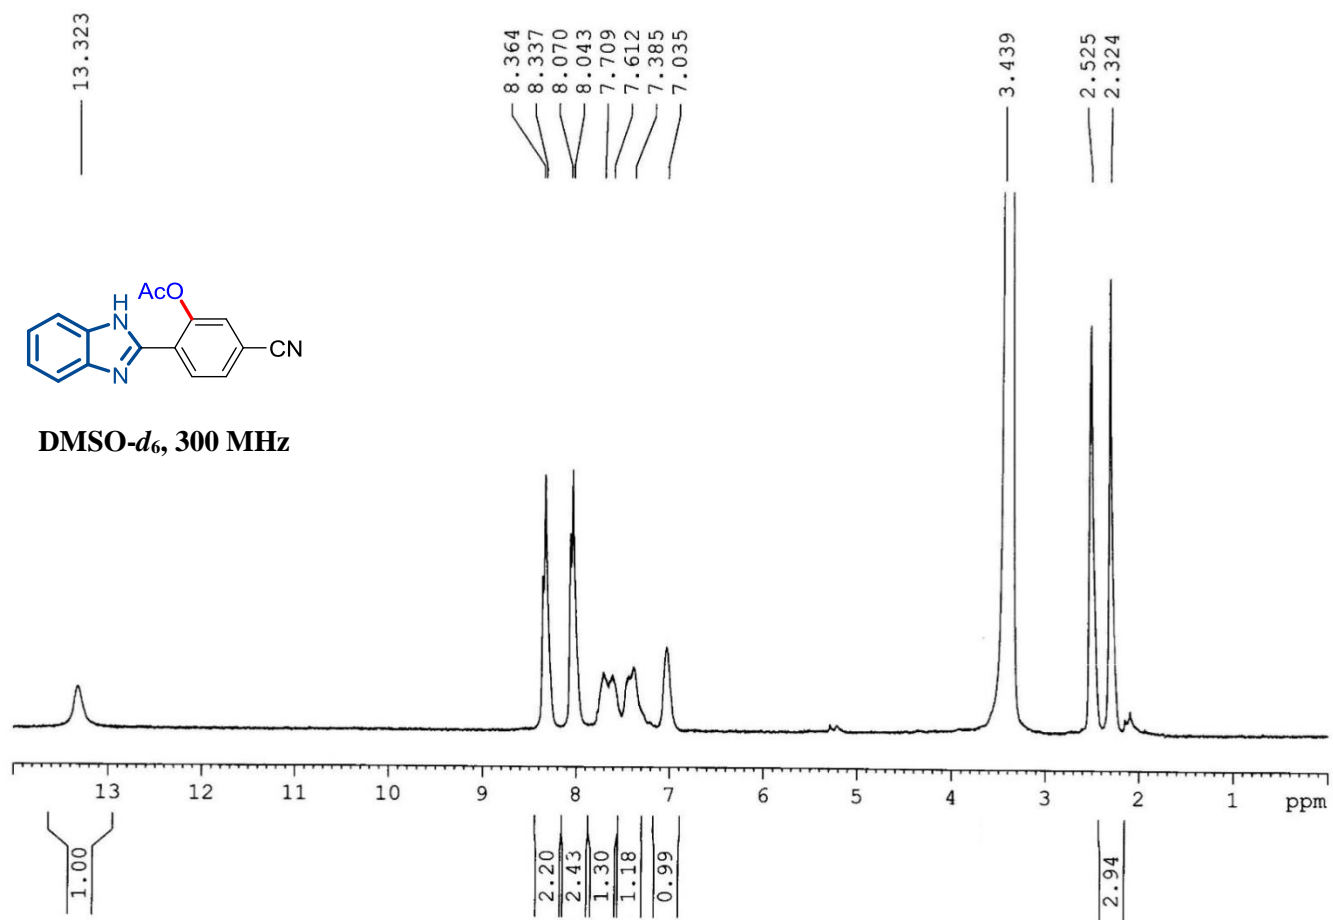

# <sup>13</sup>C NMR of Compound 2h

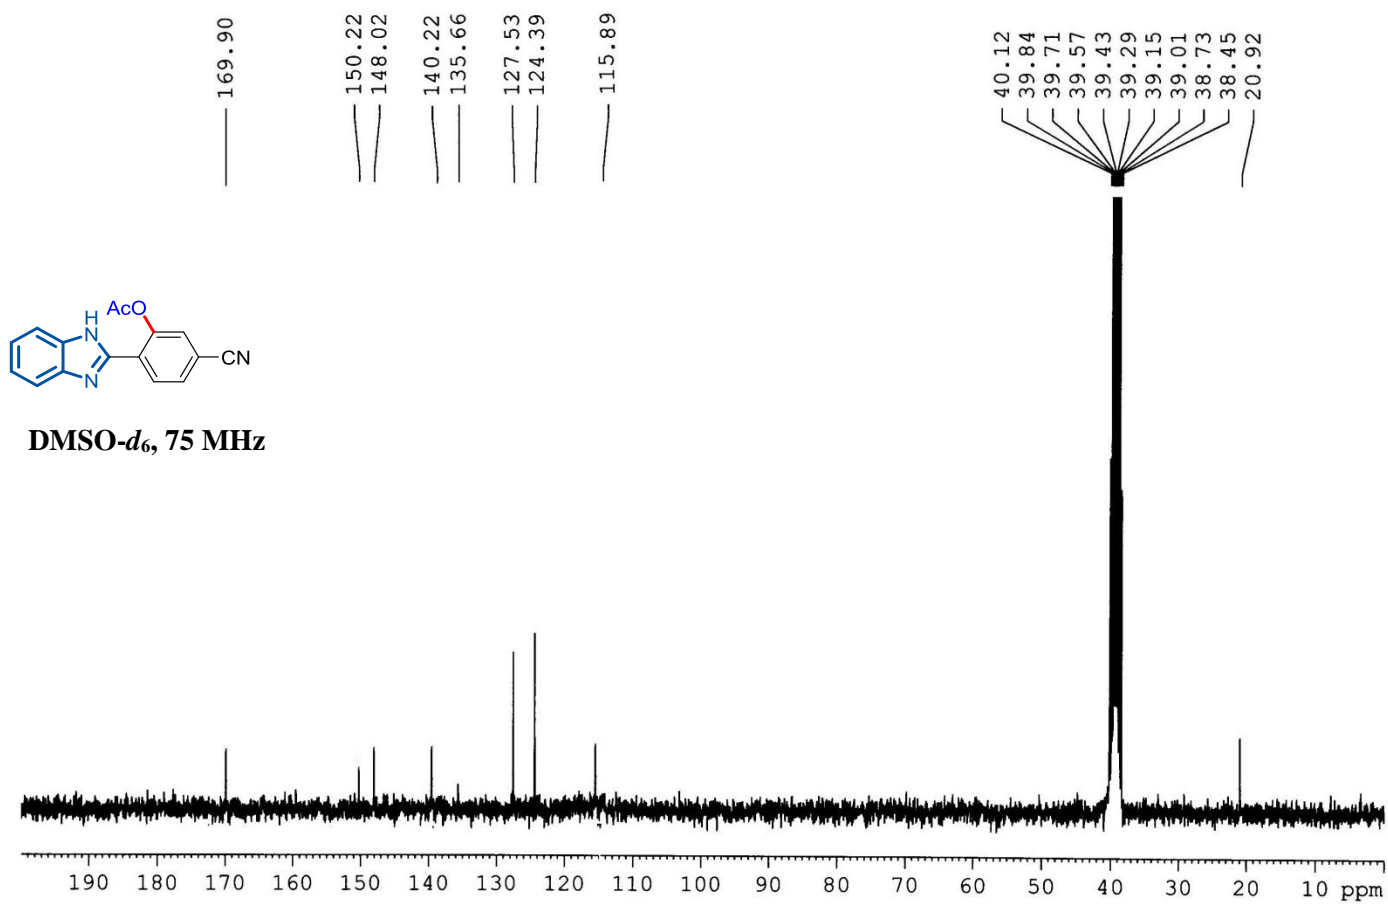

# <sup>1</sup>H NMR of Compound 2i

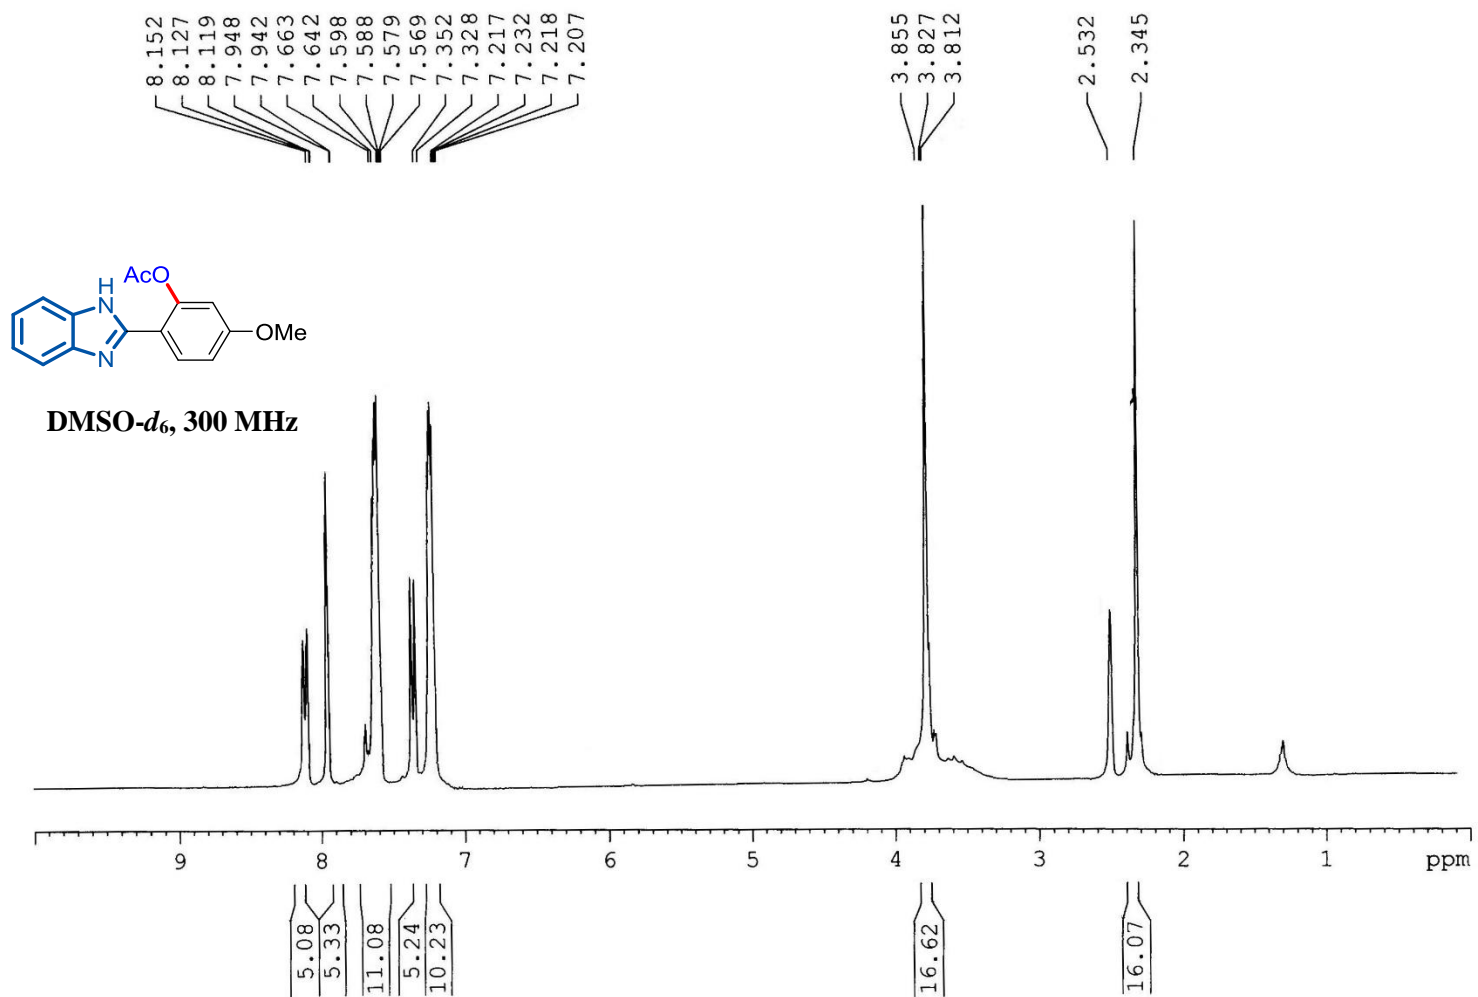



# <sup>13</sup>C NMR of Compound 2i

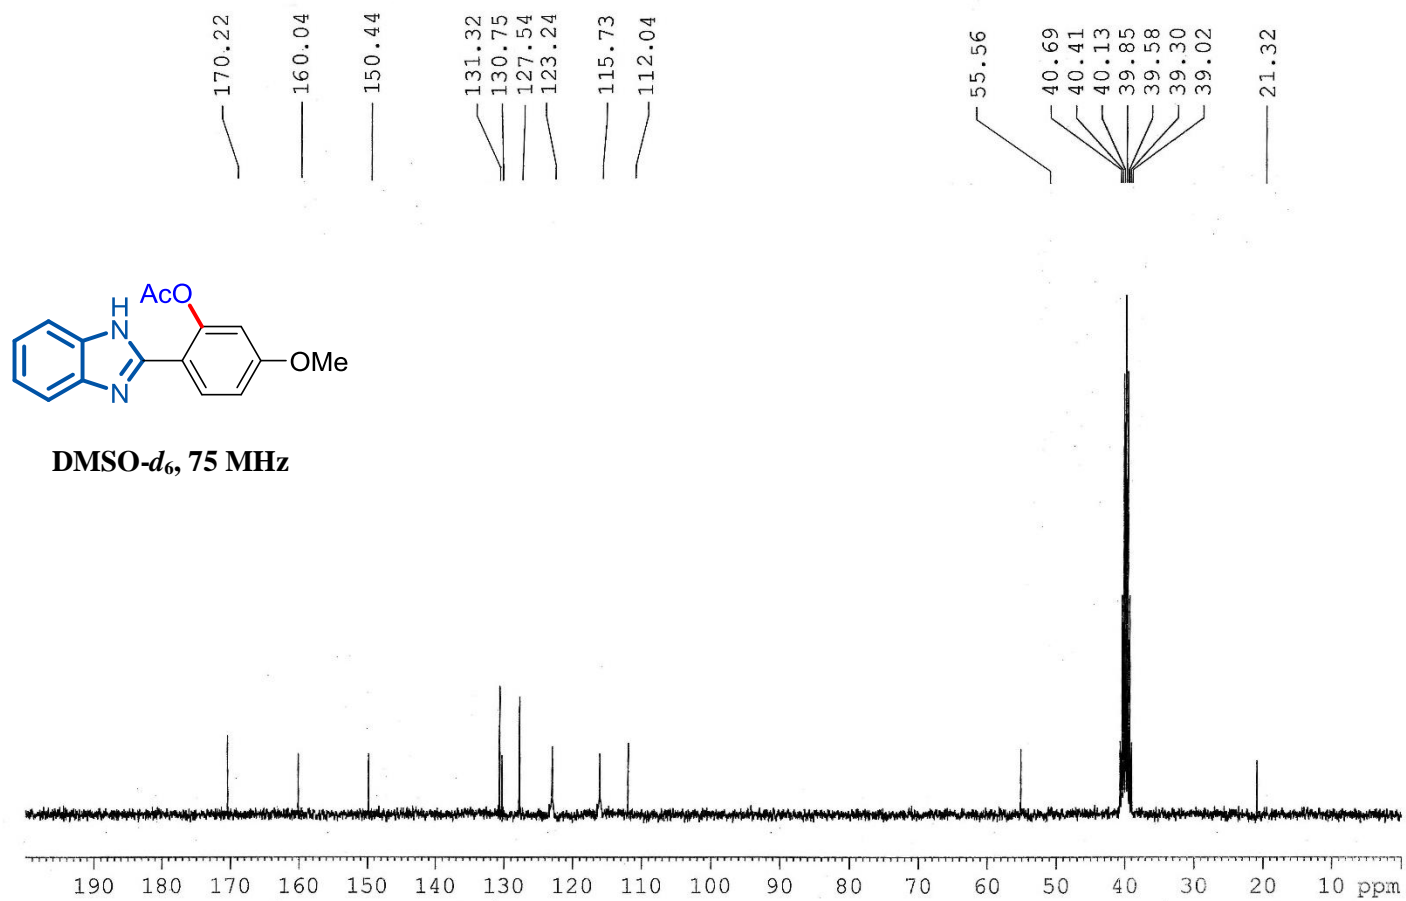

# <sup>1</sup>H NMR of Compound 2j

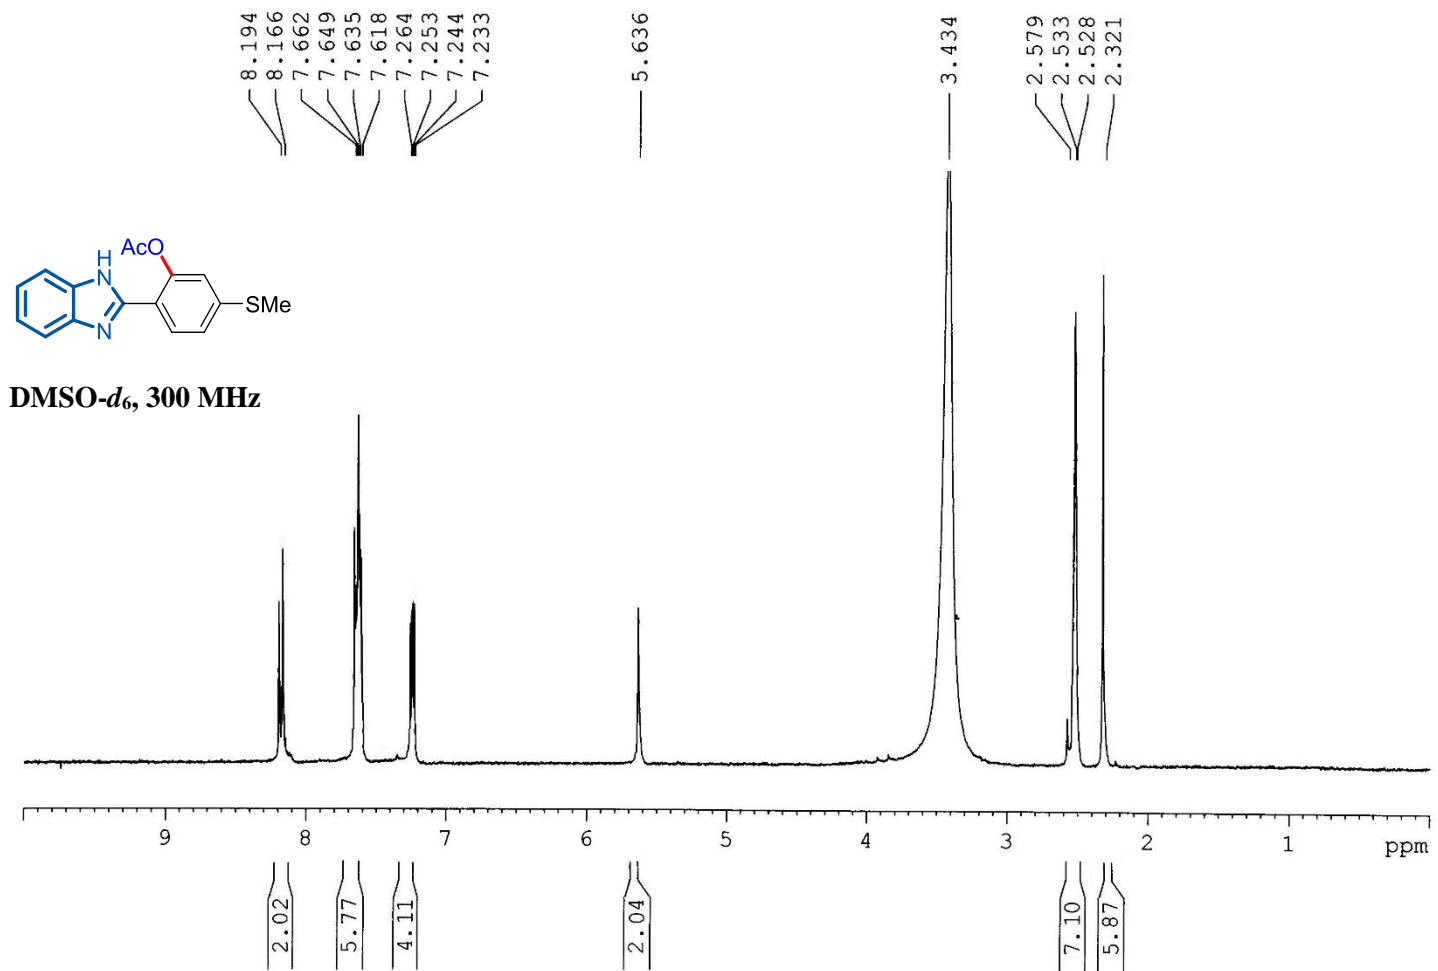

# <sup>13</sup>C NMR of Compound 2j

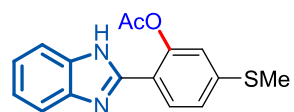

DMSO-*d*<sub>6</sub>, 75 MHz

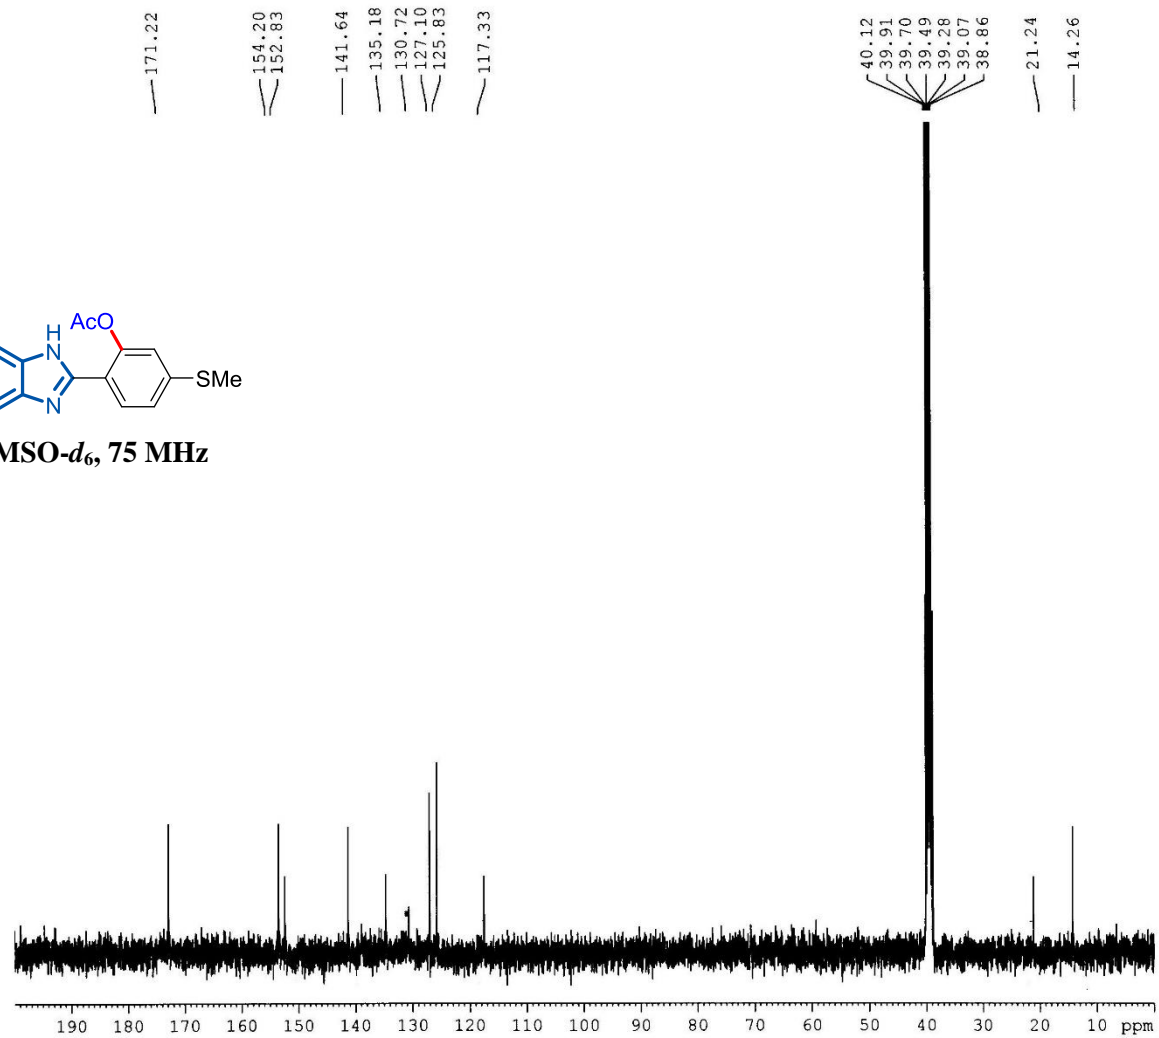

# <sup>1</sup>H NMR of Compound 2k

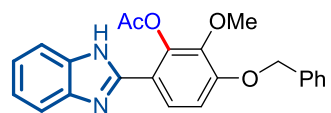

DMSO-*d*<sub>6</sub>, 600 MHz

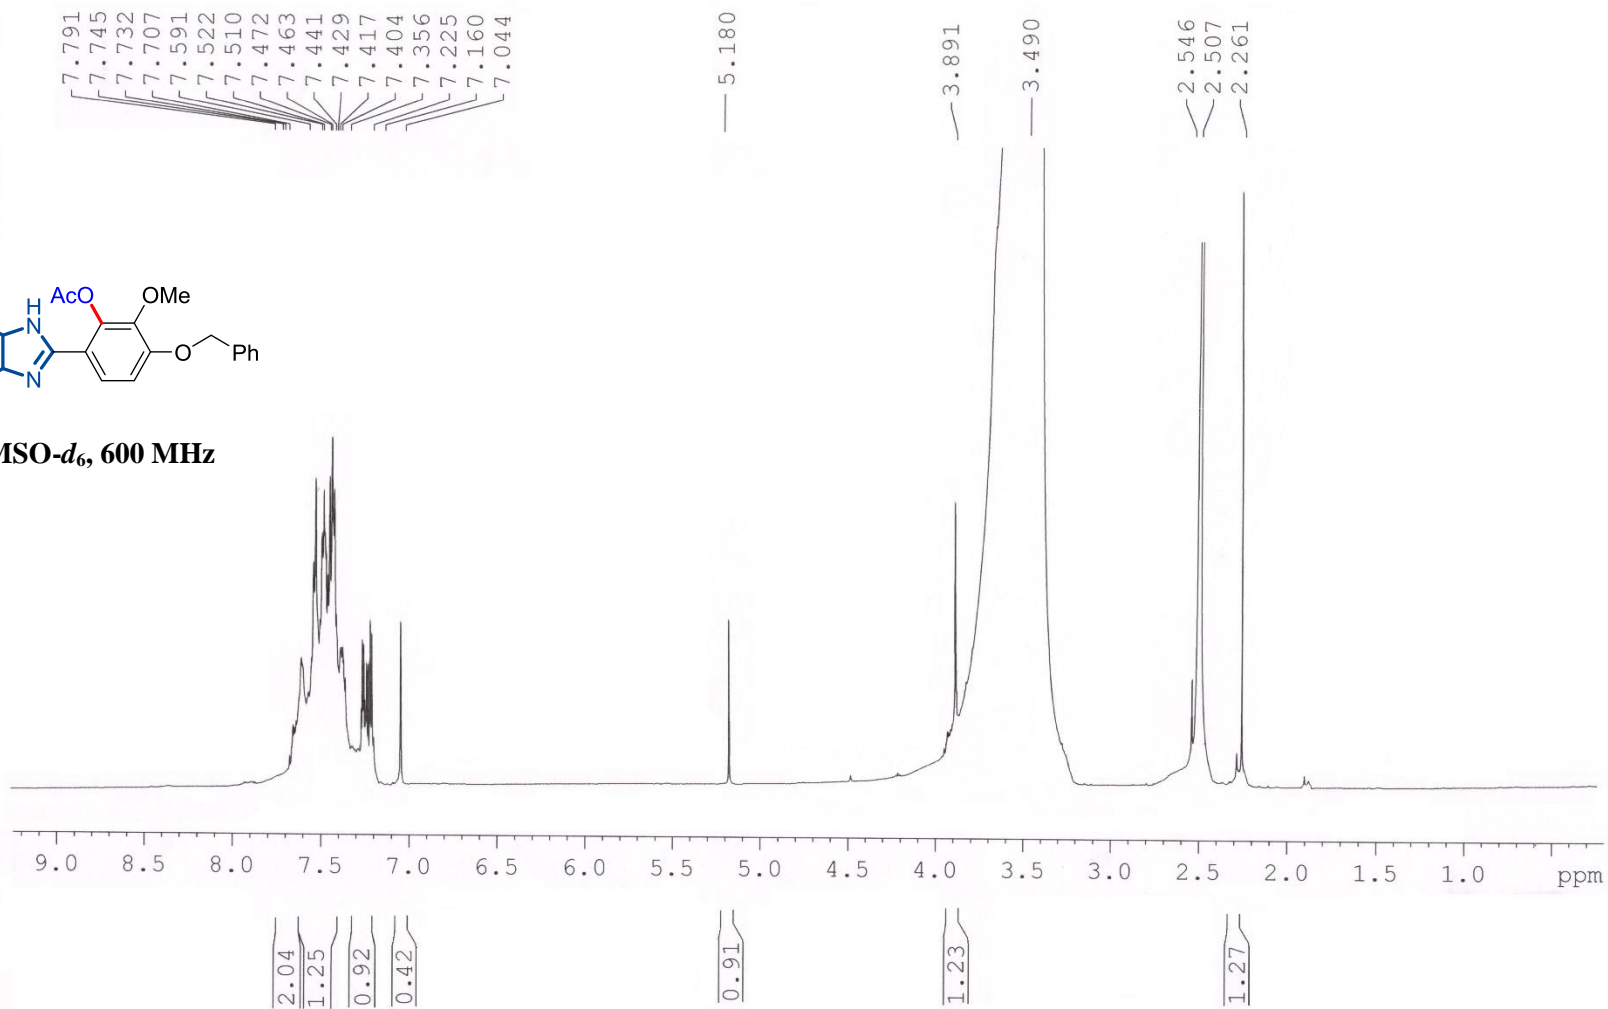

# <sup>13</sup>C NMR of Compound 2k

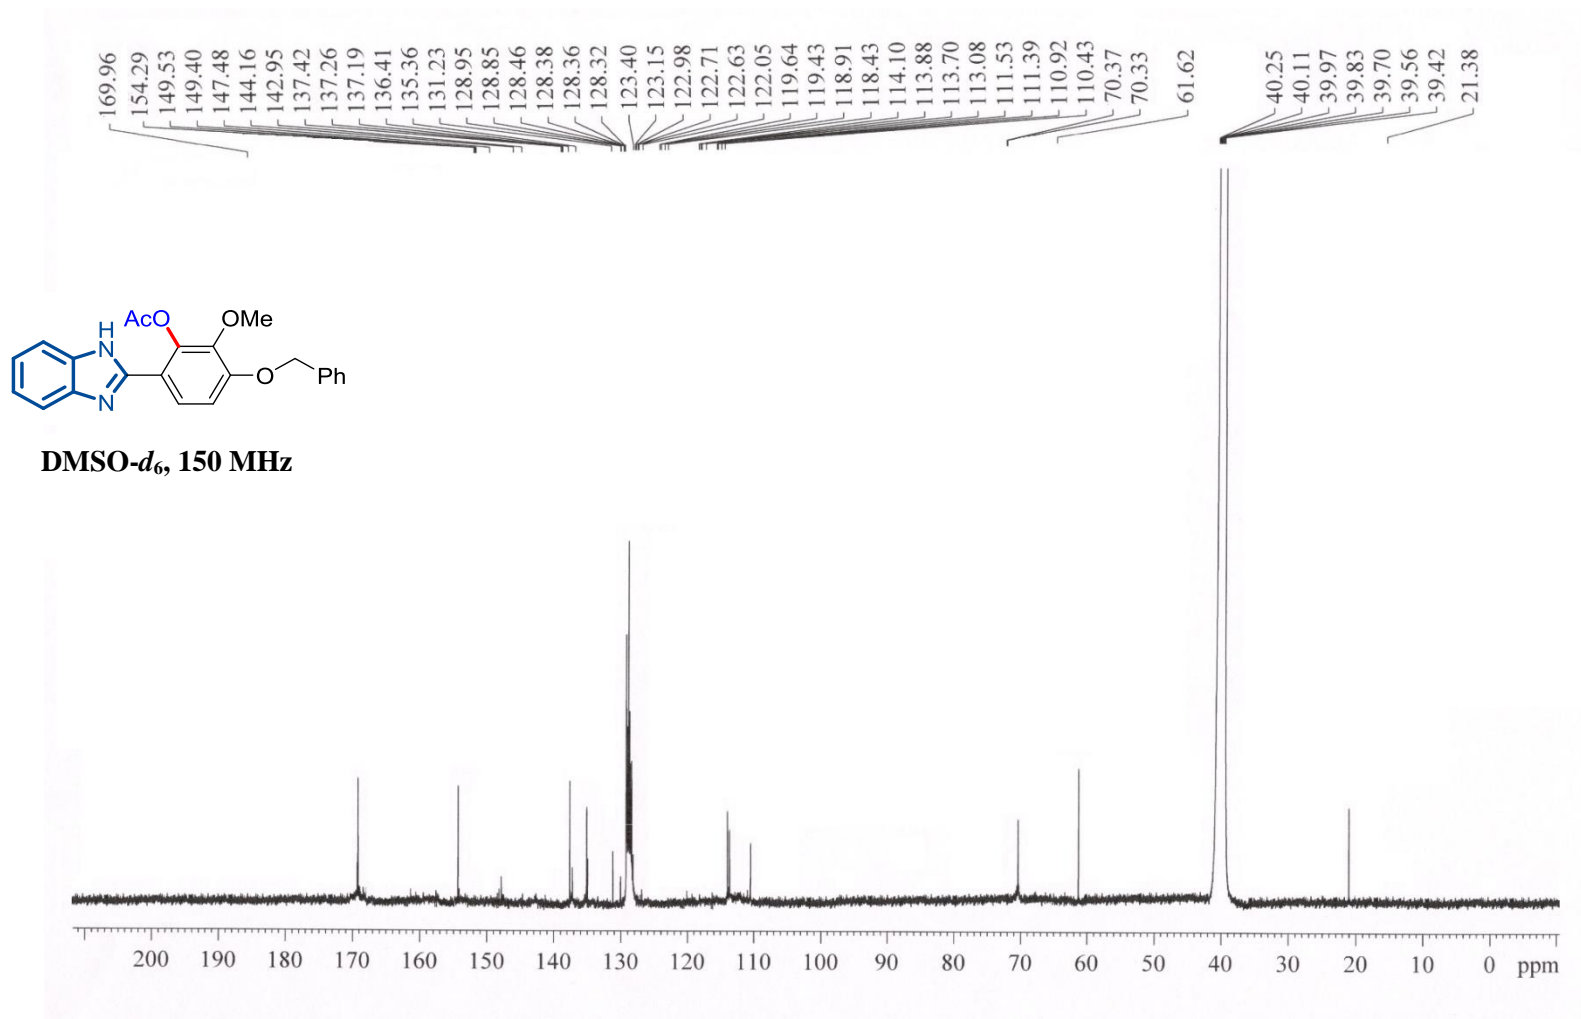

# <sup>1</sup>H NMR of Compound 2l

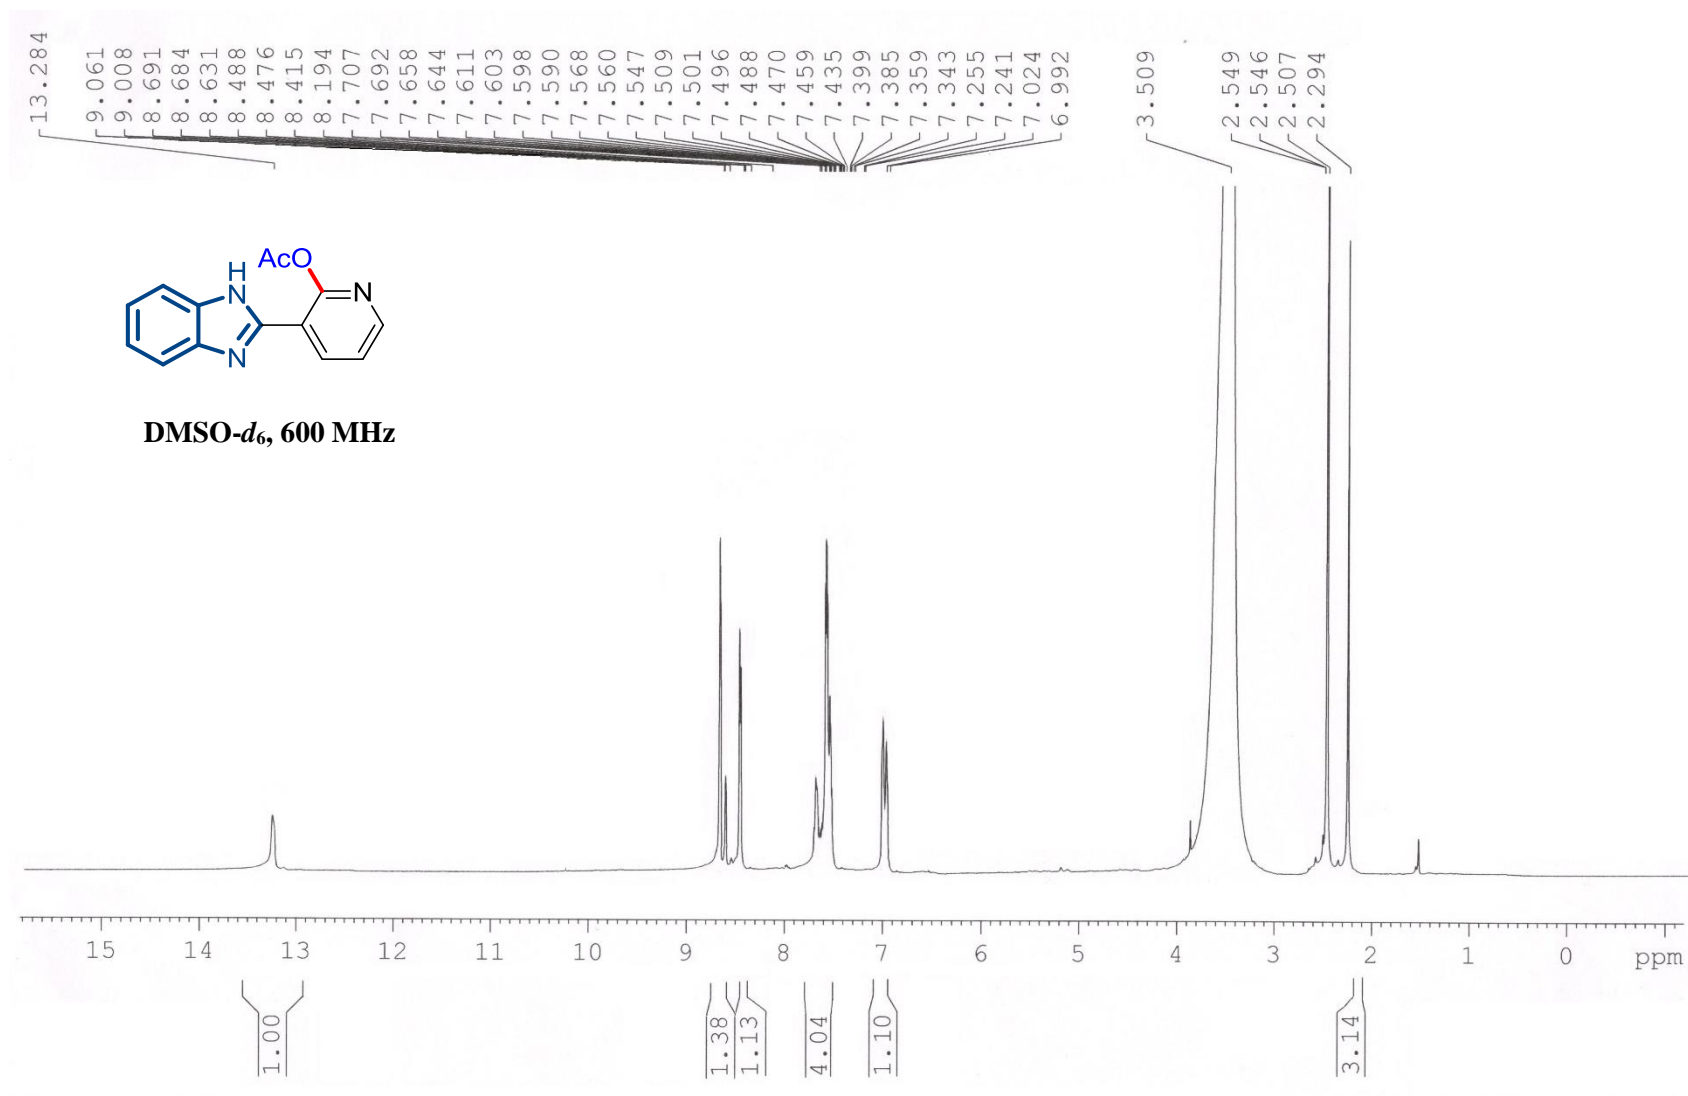

# <sup>13</sup>C NMR of Compound 2l

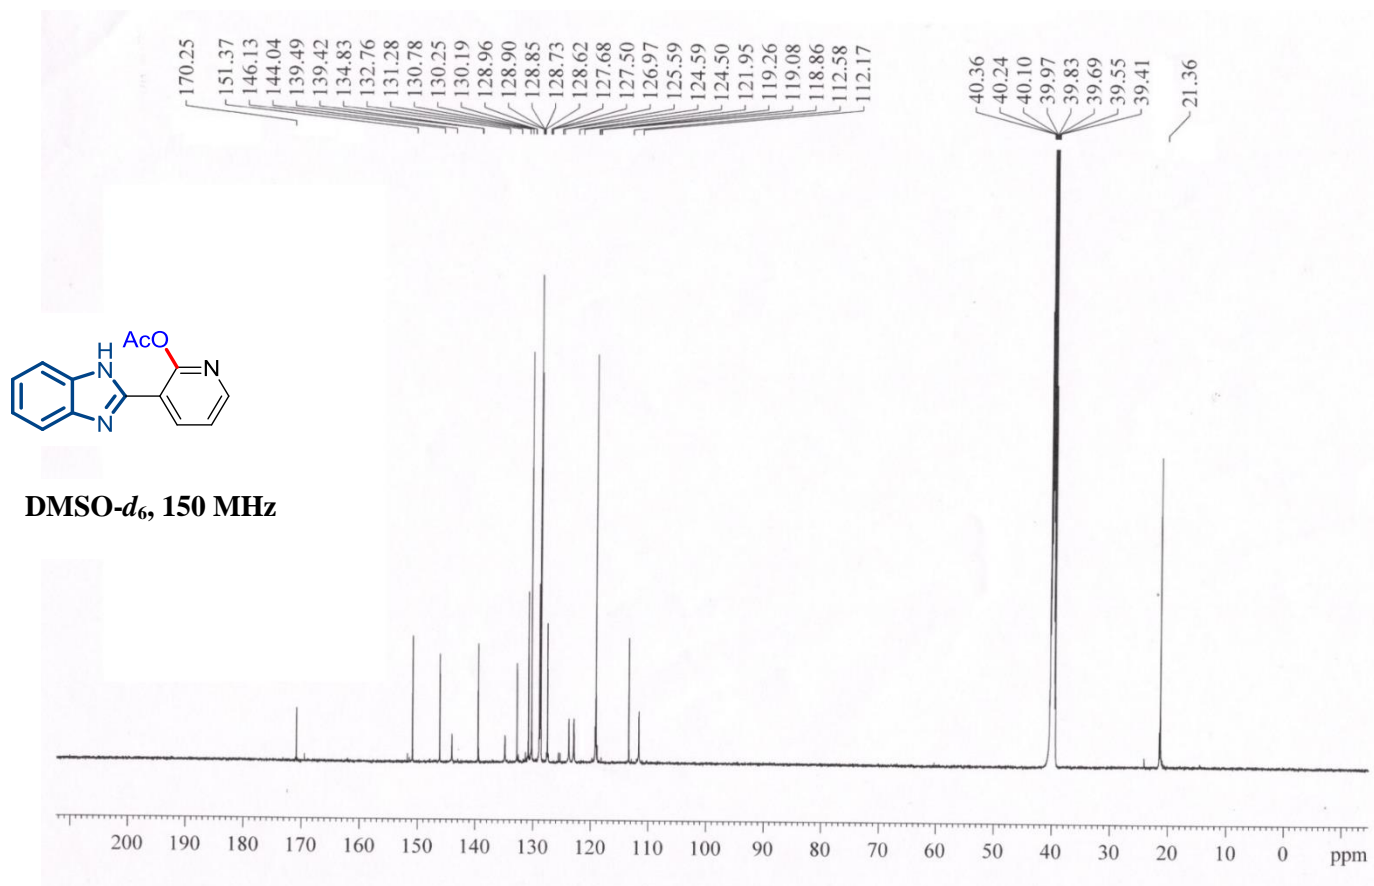

# $^1\text{H}$ NMR of Compound 2m

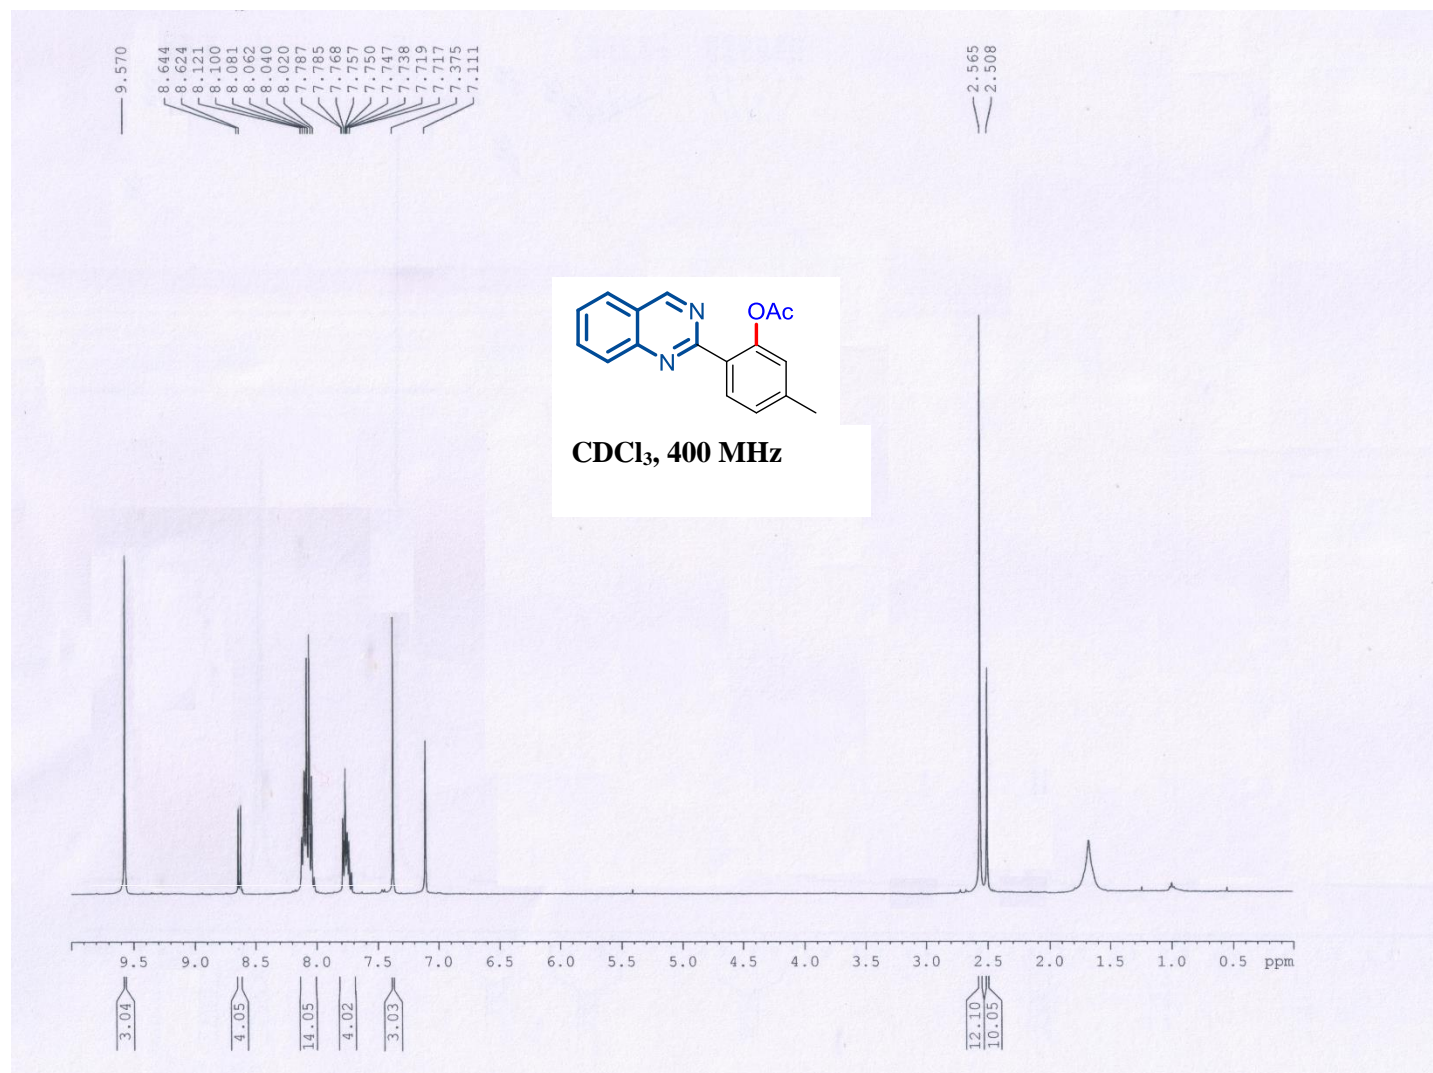



# $^{13}\text{C}$ NMR of Compound 2m

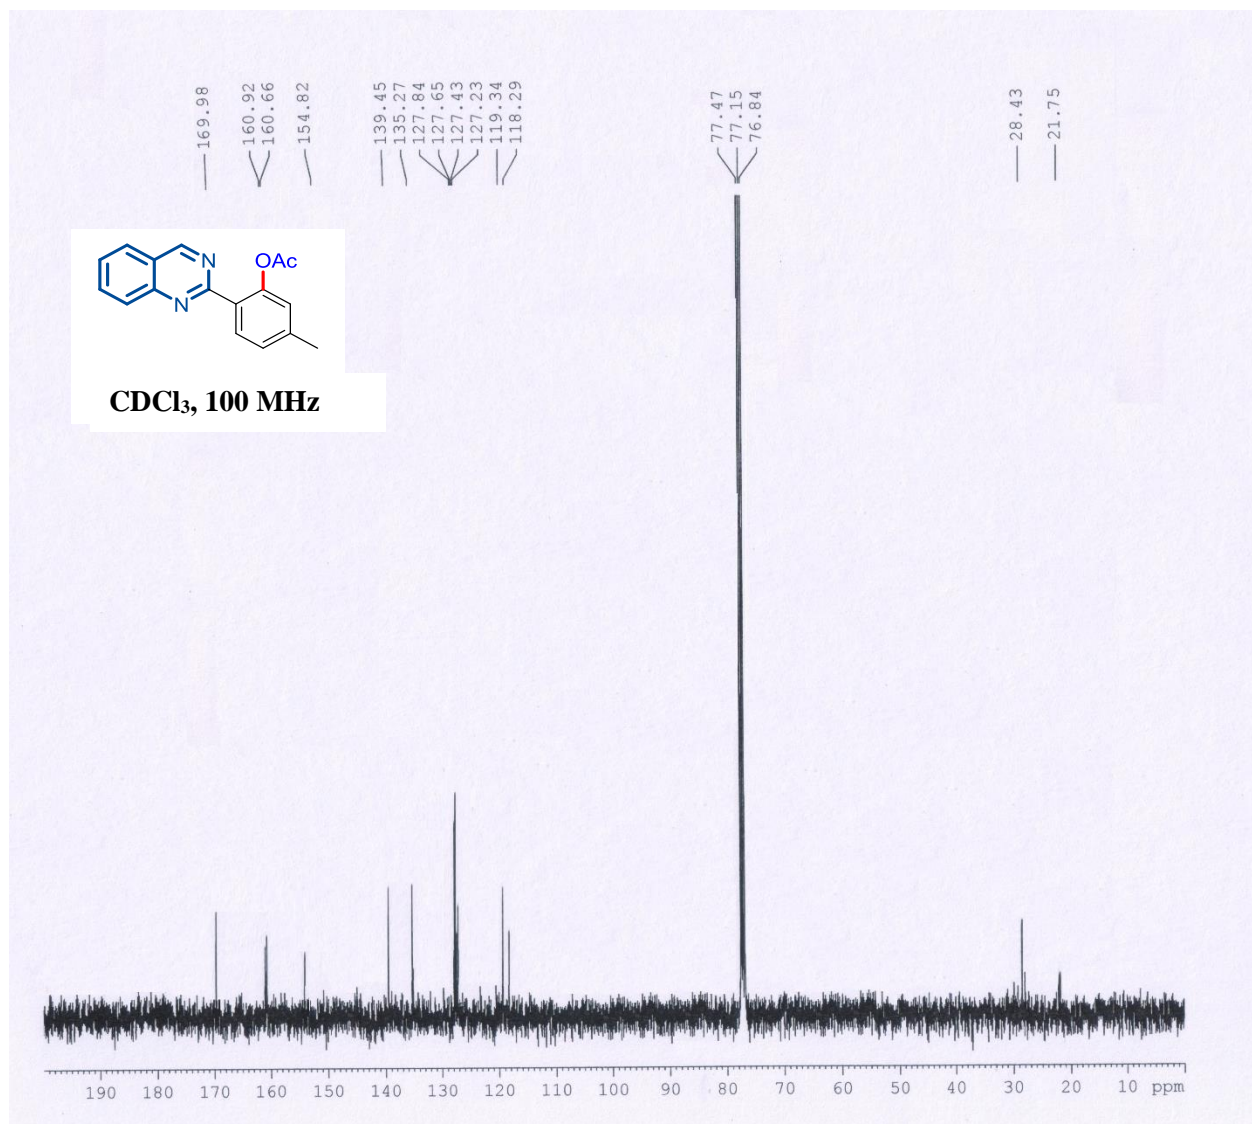

# <sup>1</sup>H NMR of Compound 2n

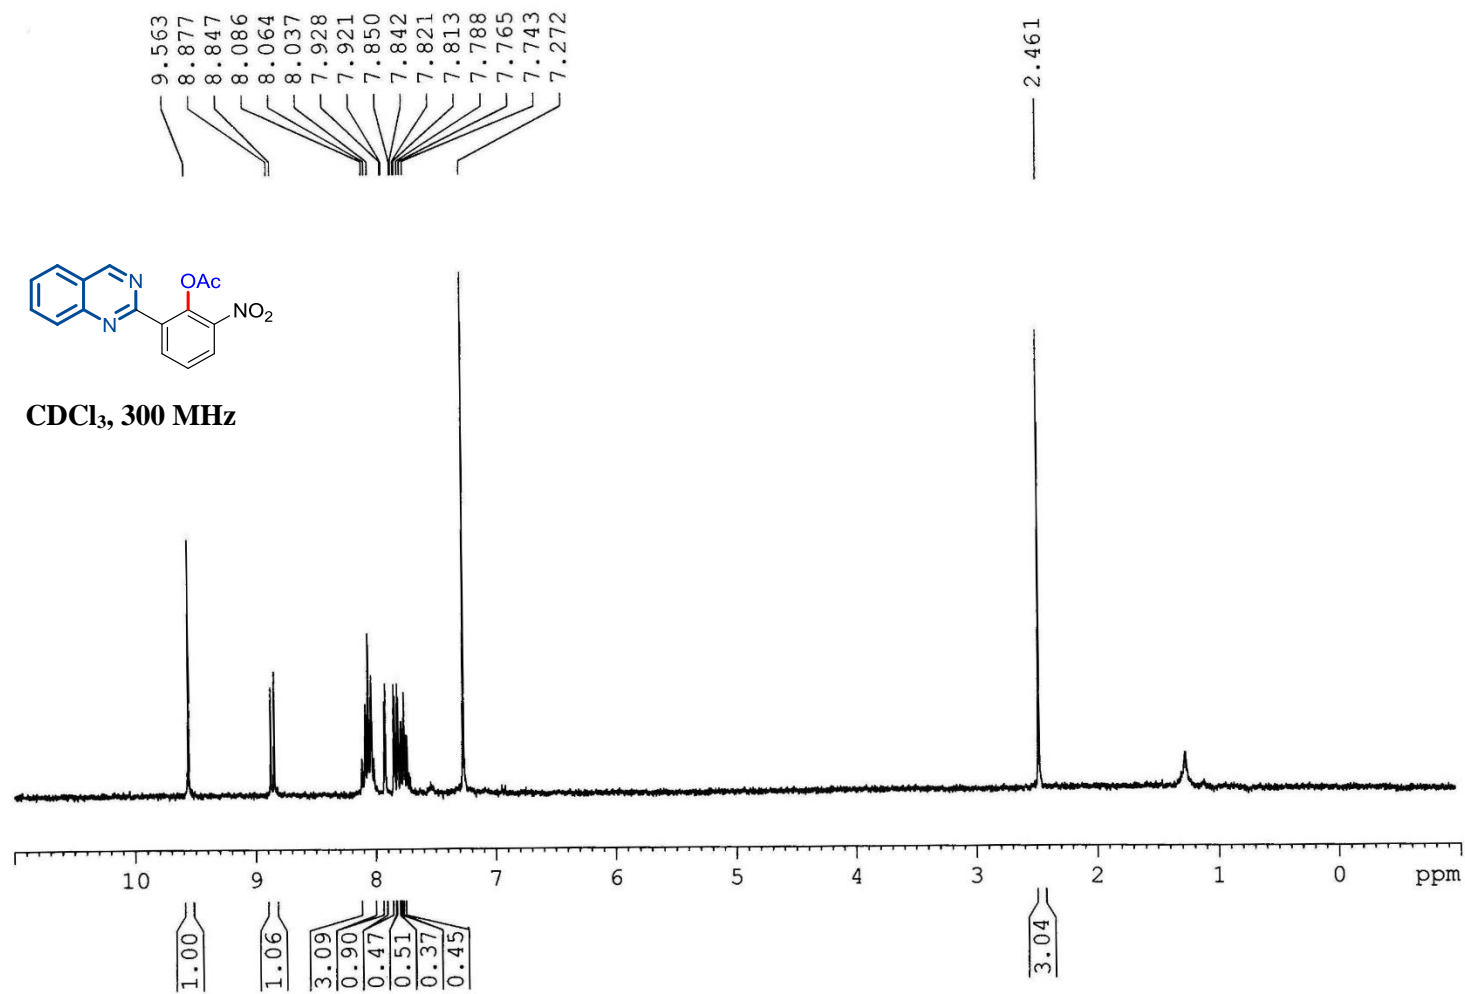

# <sup>13</sup>C NMR of Compound 2n

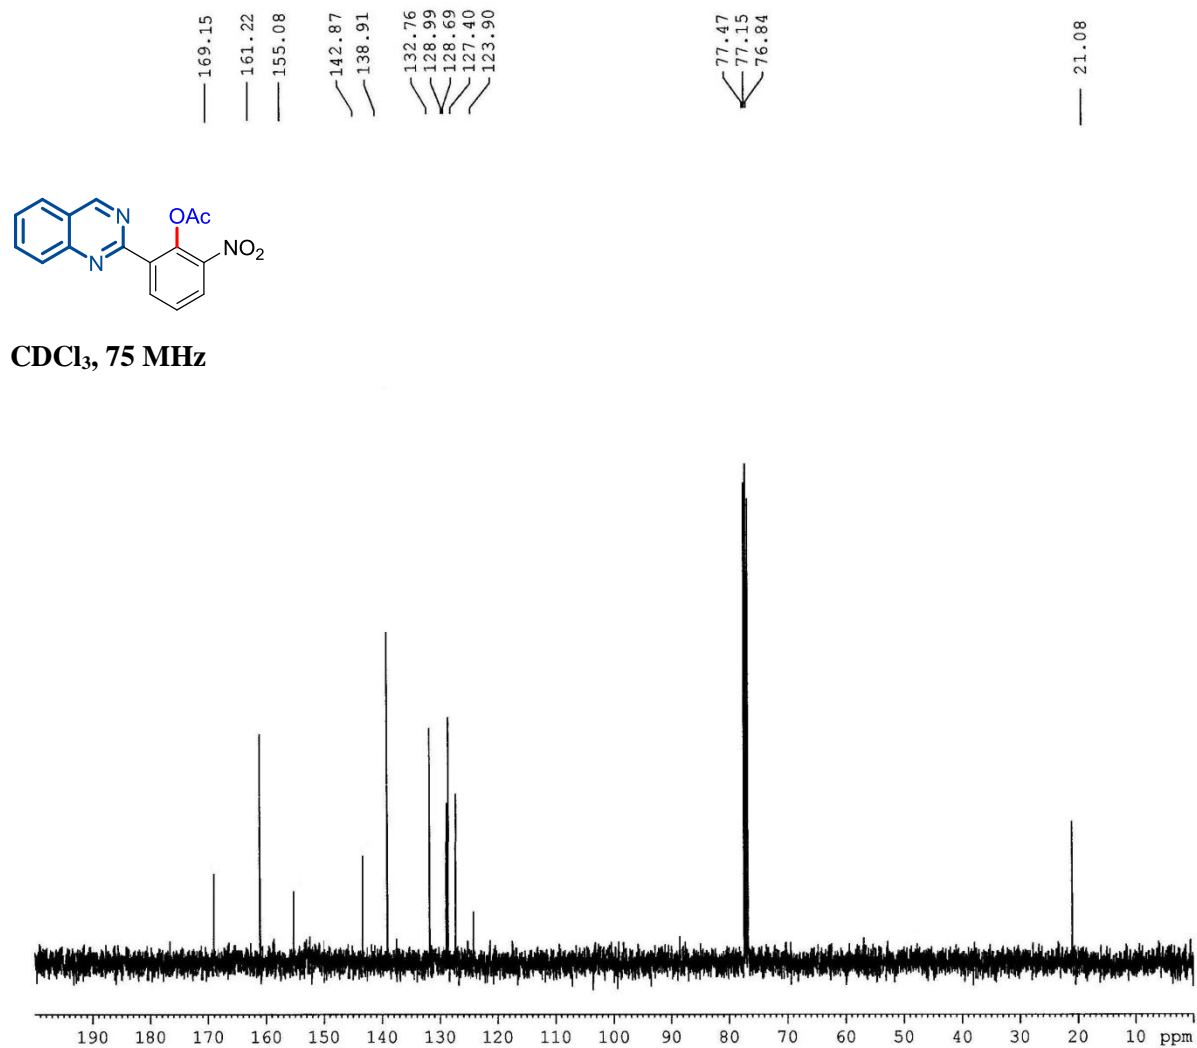

# <sup>1</sup>H NMR of Compound 3a

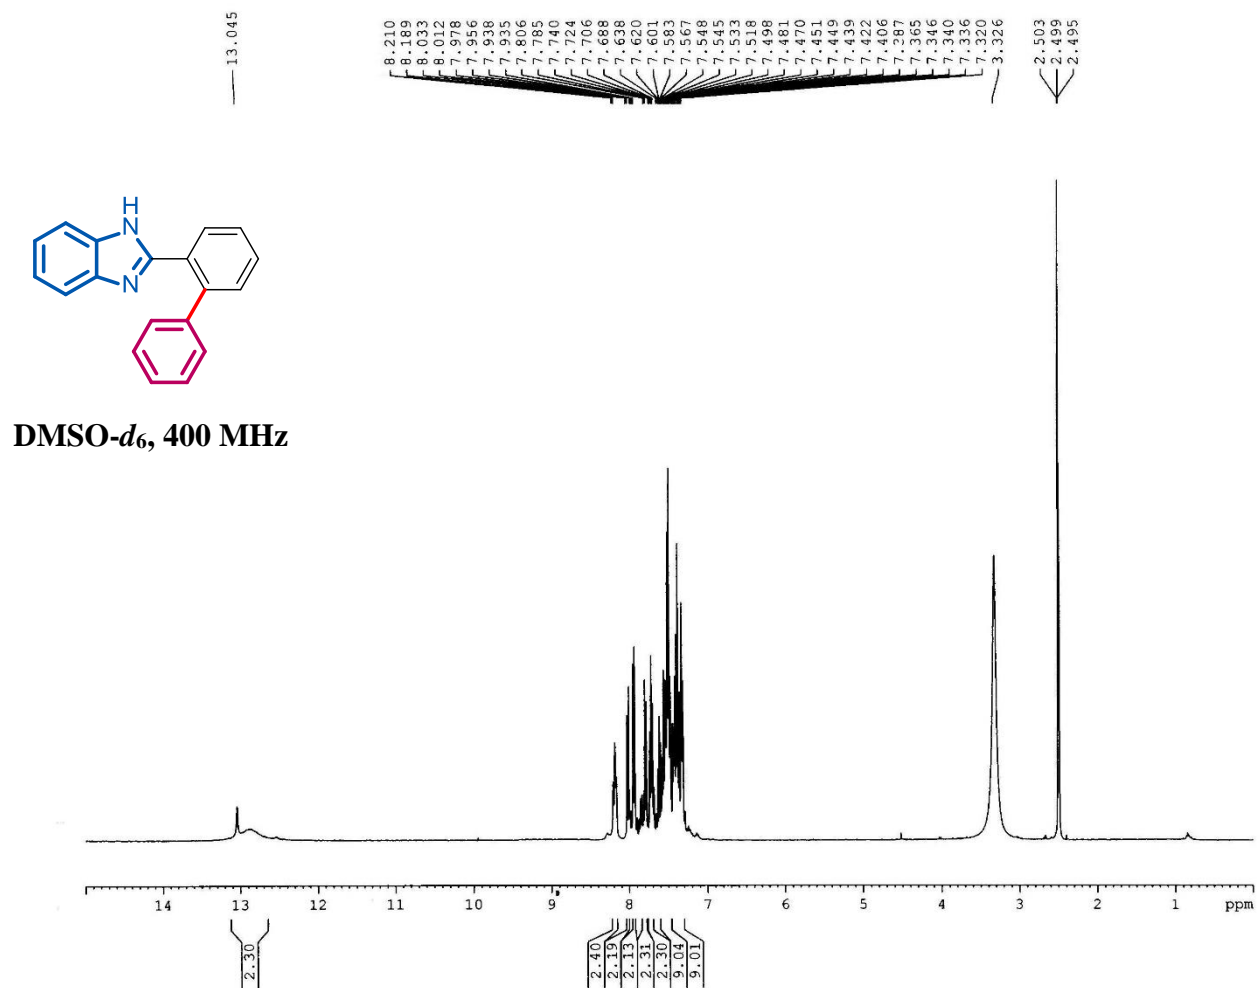

# <sup>13</sup>C NMR of Compound 3a

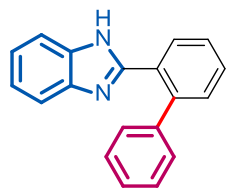

DMSO-*d*<sub>6</sub>, 100 MHz

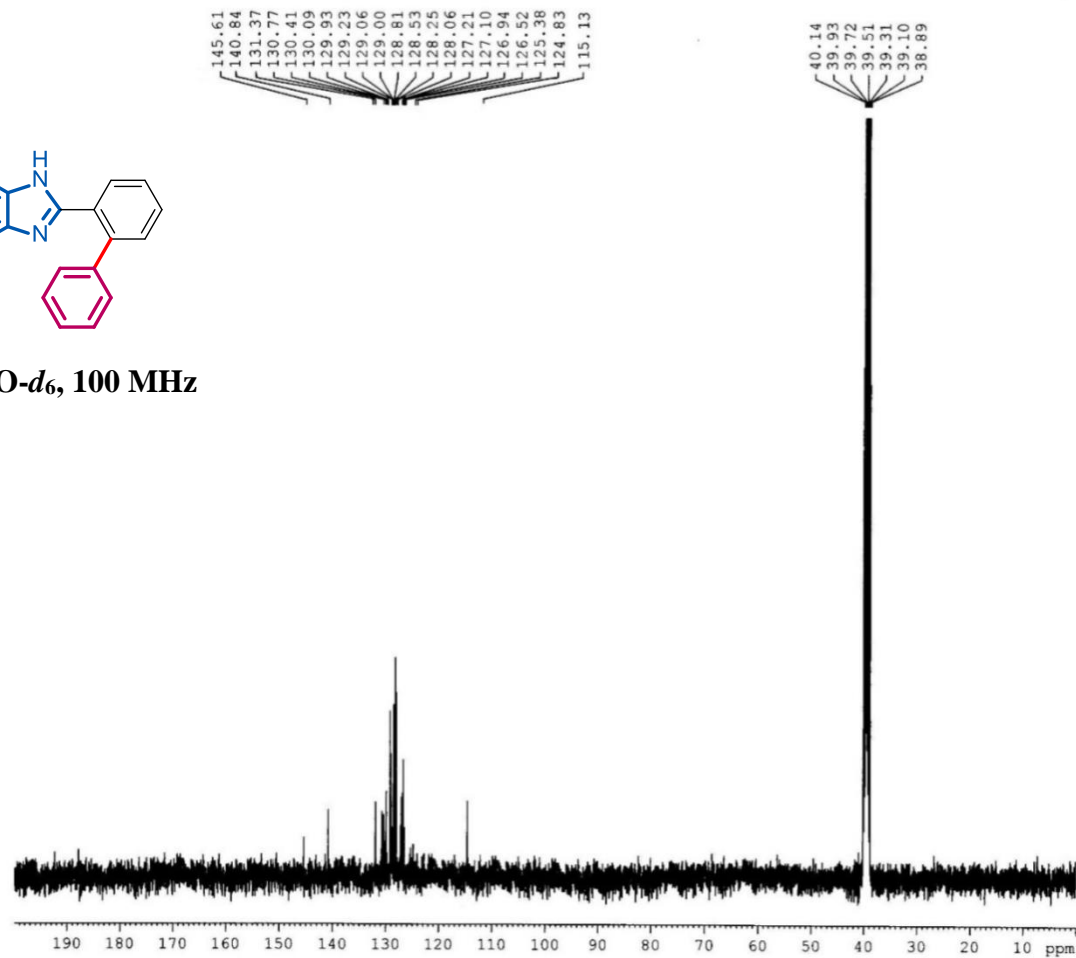

# <sup>1</sup>H NMR of Compound 3b

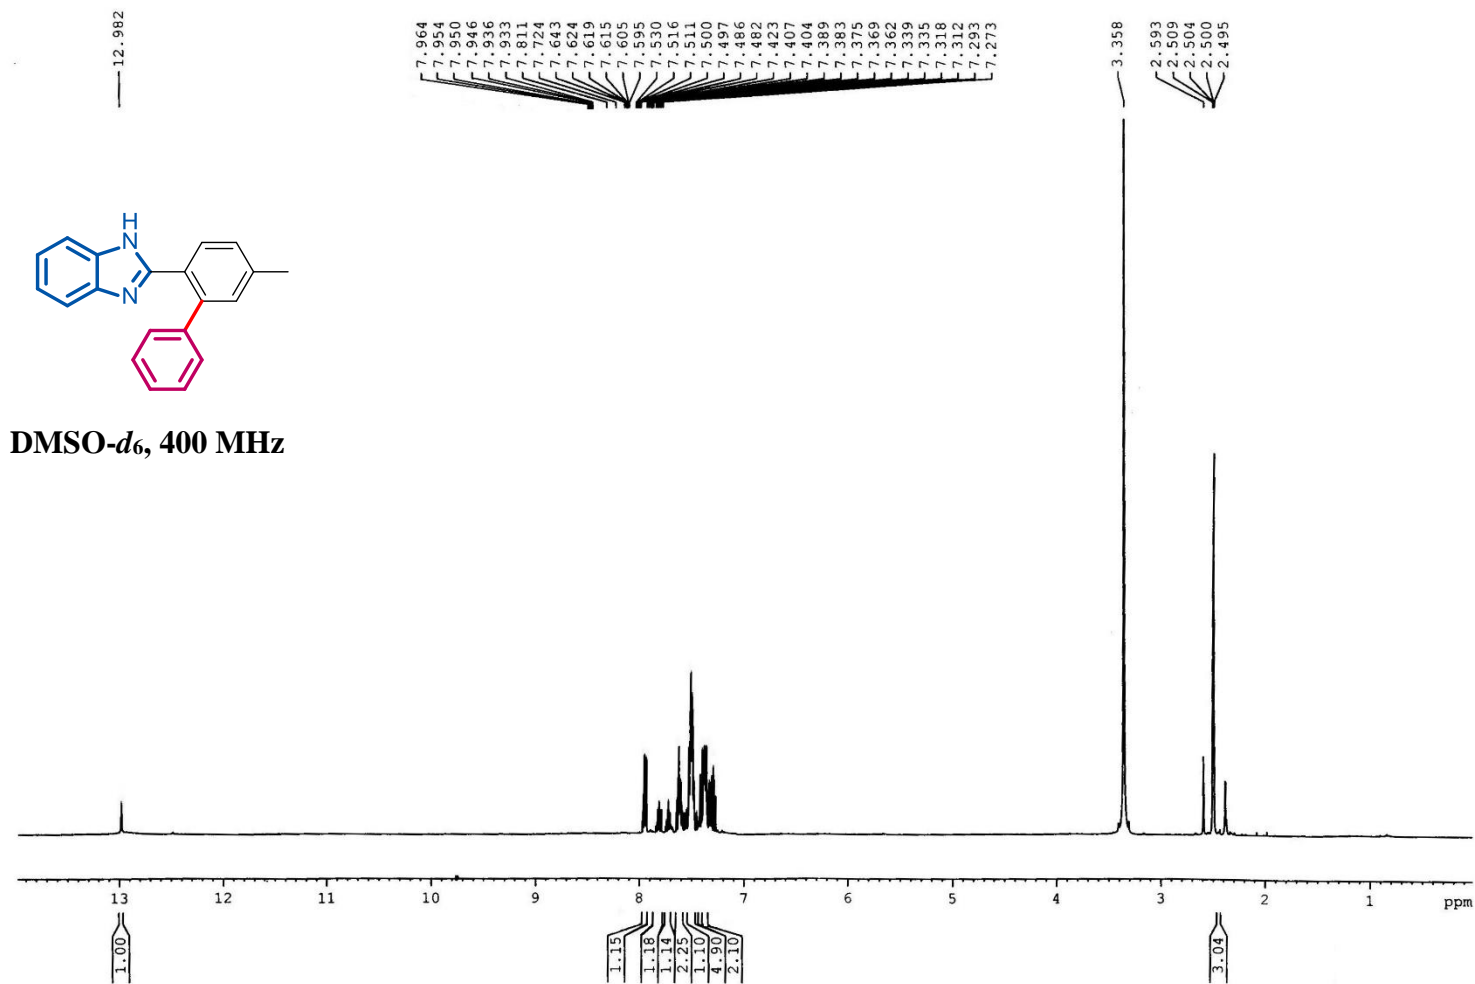

# <sup>13</sup>C NMR of Compound 3b

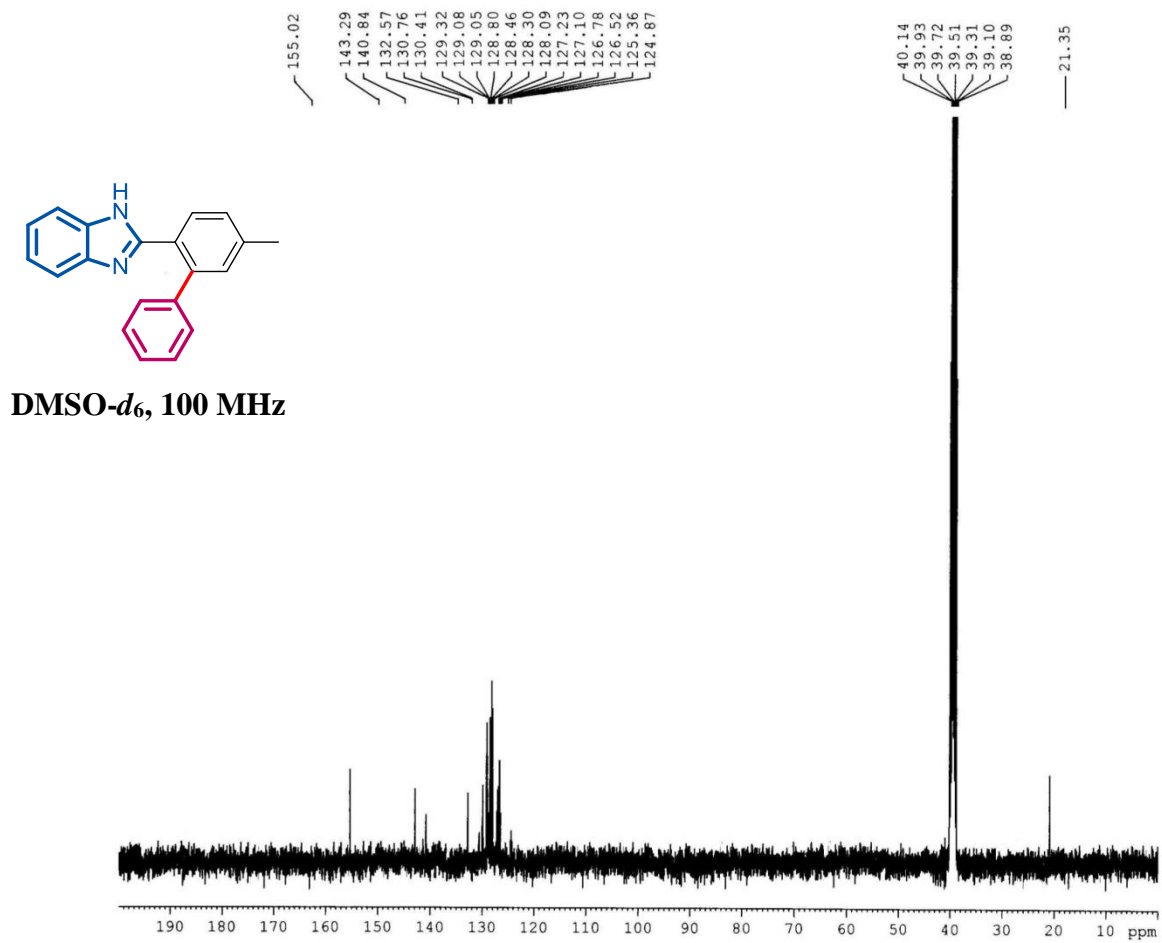

# <sup>1</sup>H NMR of Compound 3c

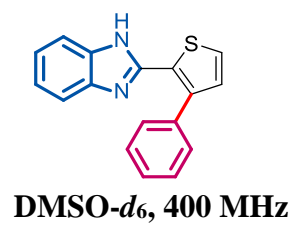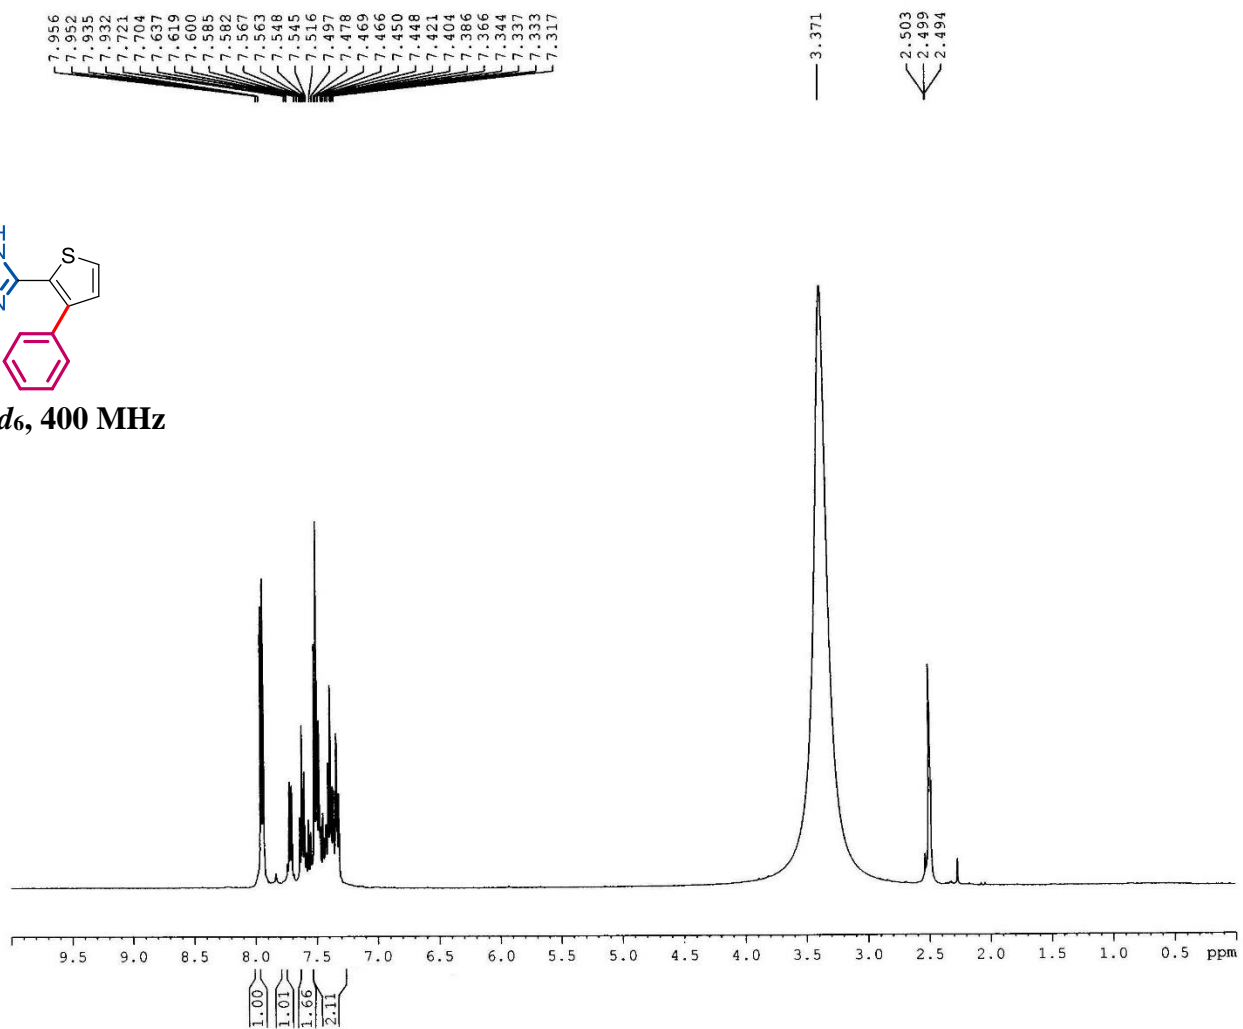



# <sup>13</sup>C NMR of Compound 3c

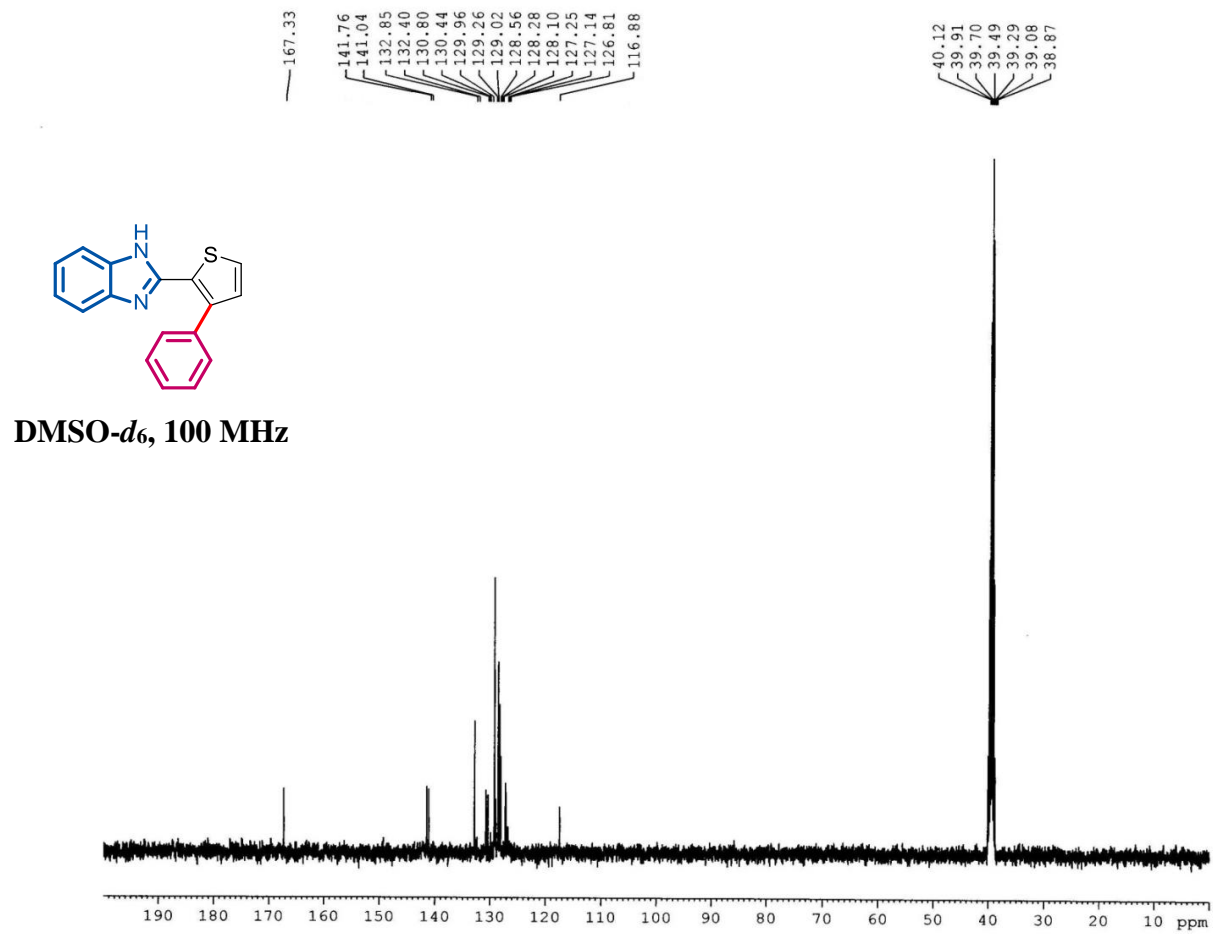

# <sup>1</sup>H NMR of Compound 3d

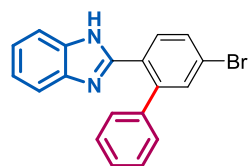

DMSO-*d*<sub>6</sub>, 400 MHz

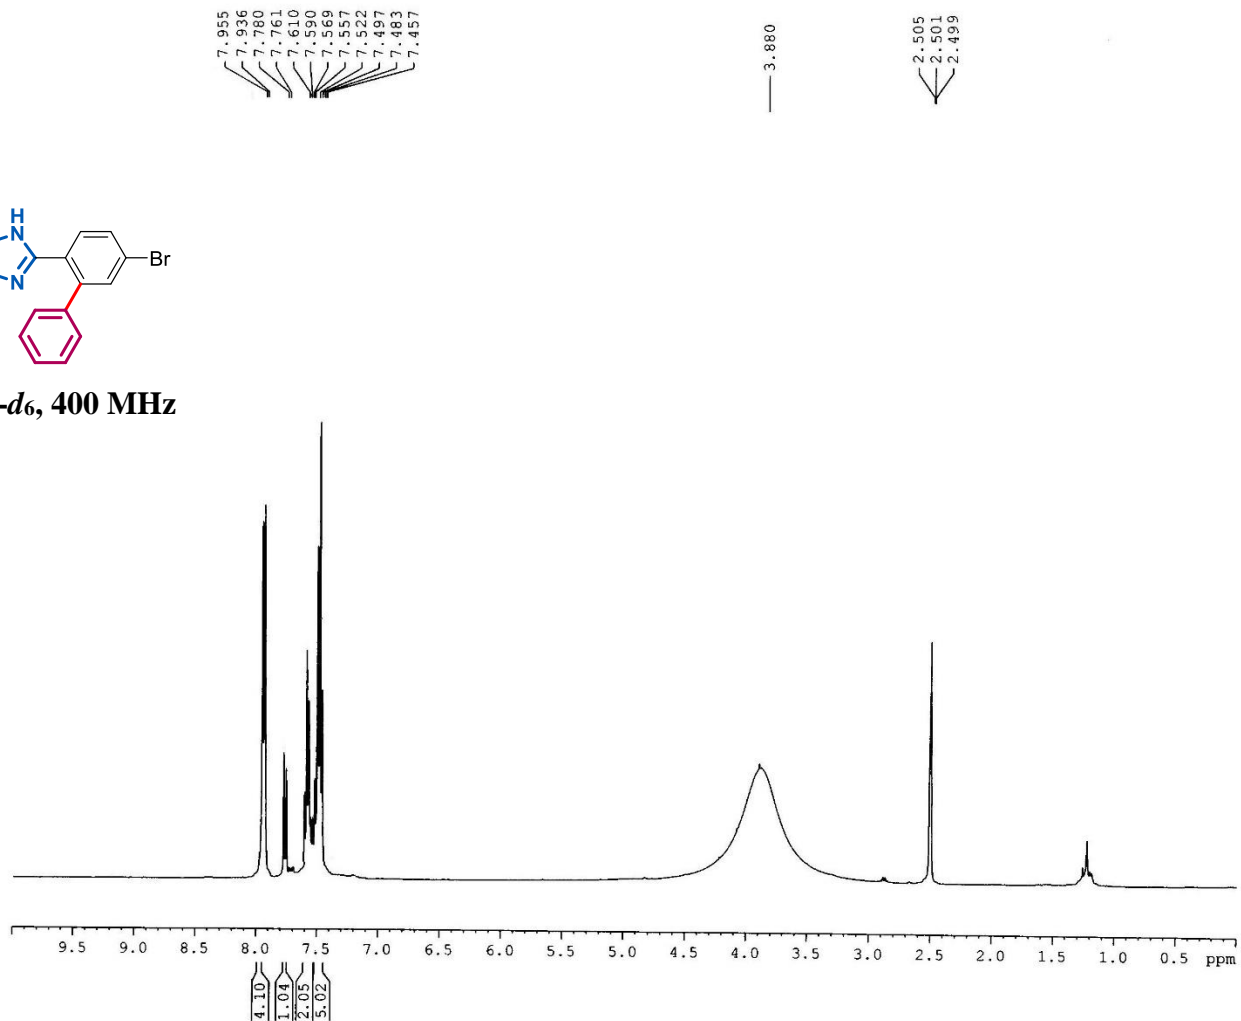

# <sup>13</sup>C NMR of Compound 3d

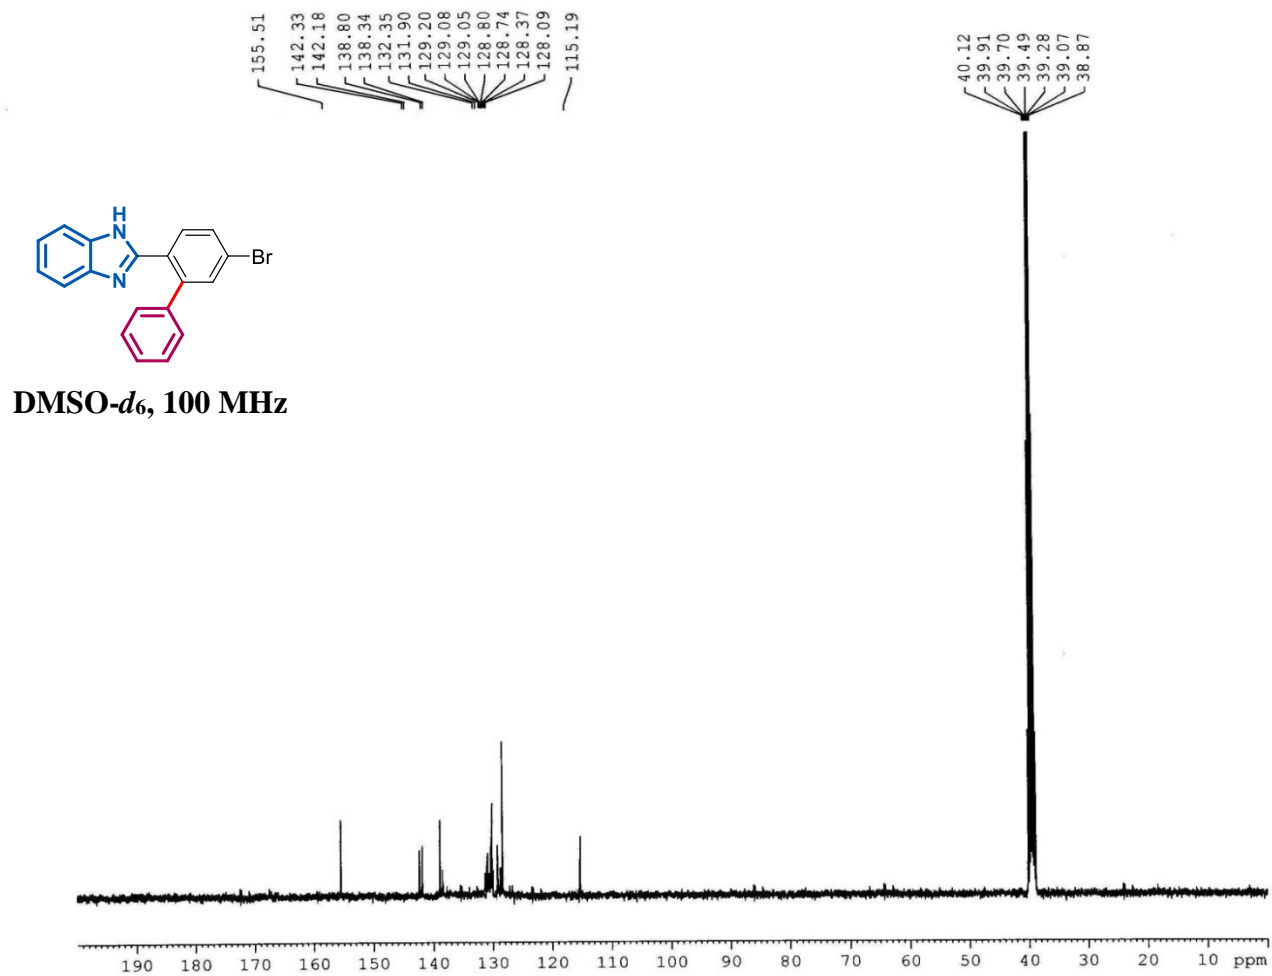

# <sup>1</sup>H NMR of Compound 3e

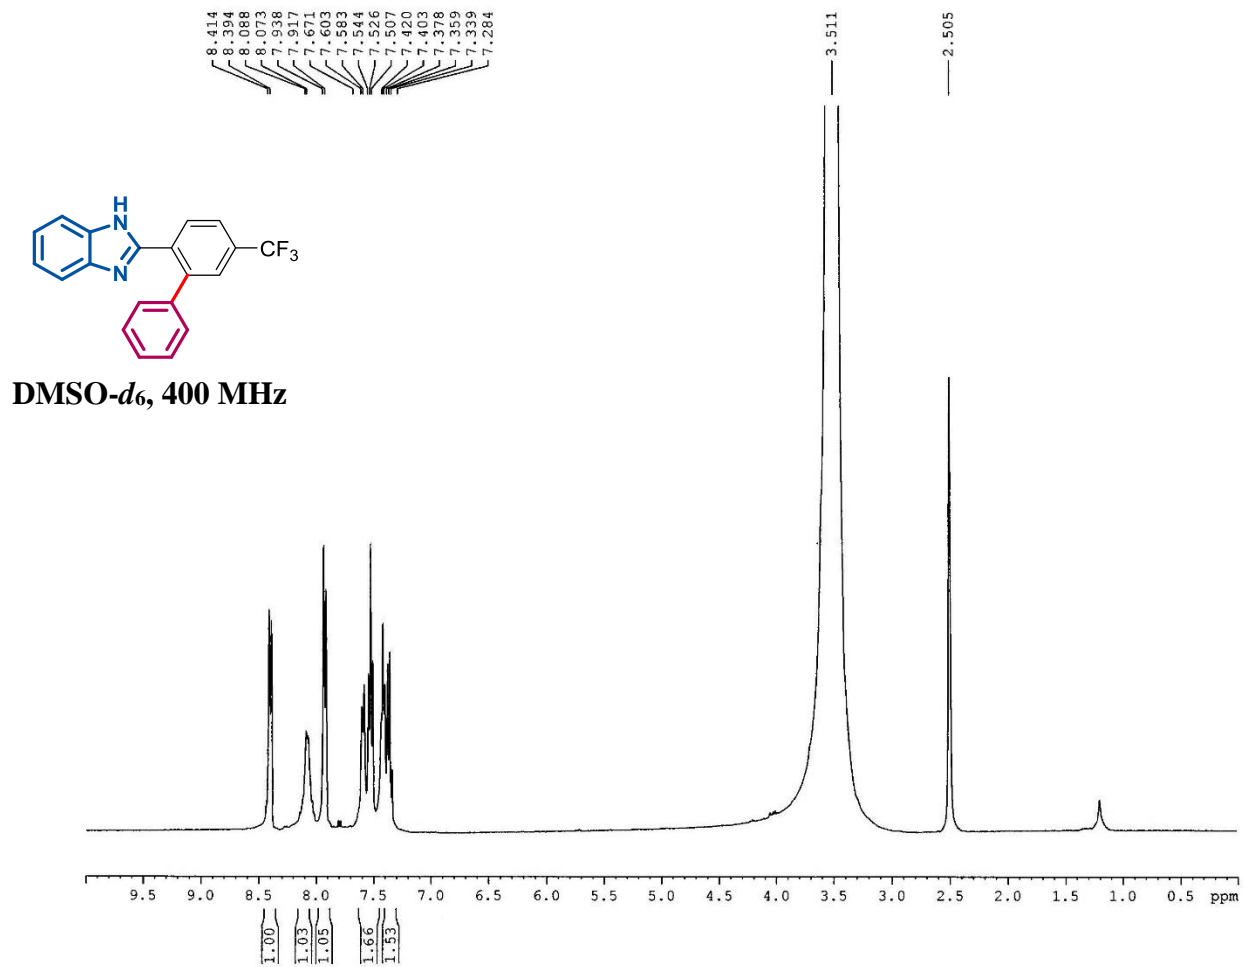

# <sup>13</sup>C NMR of Compound 3e

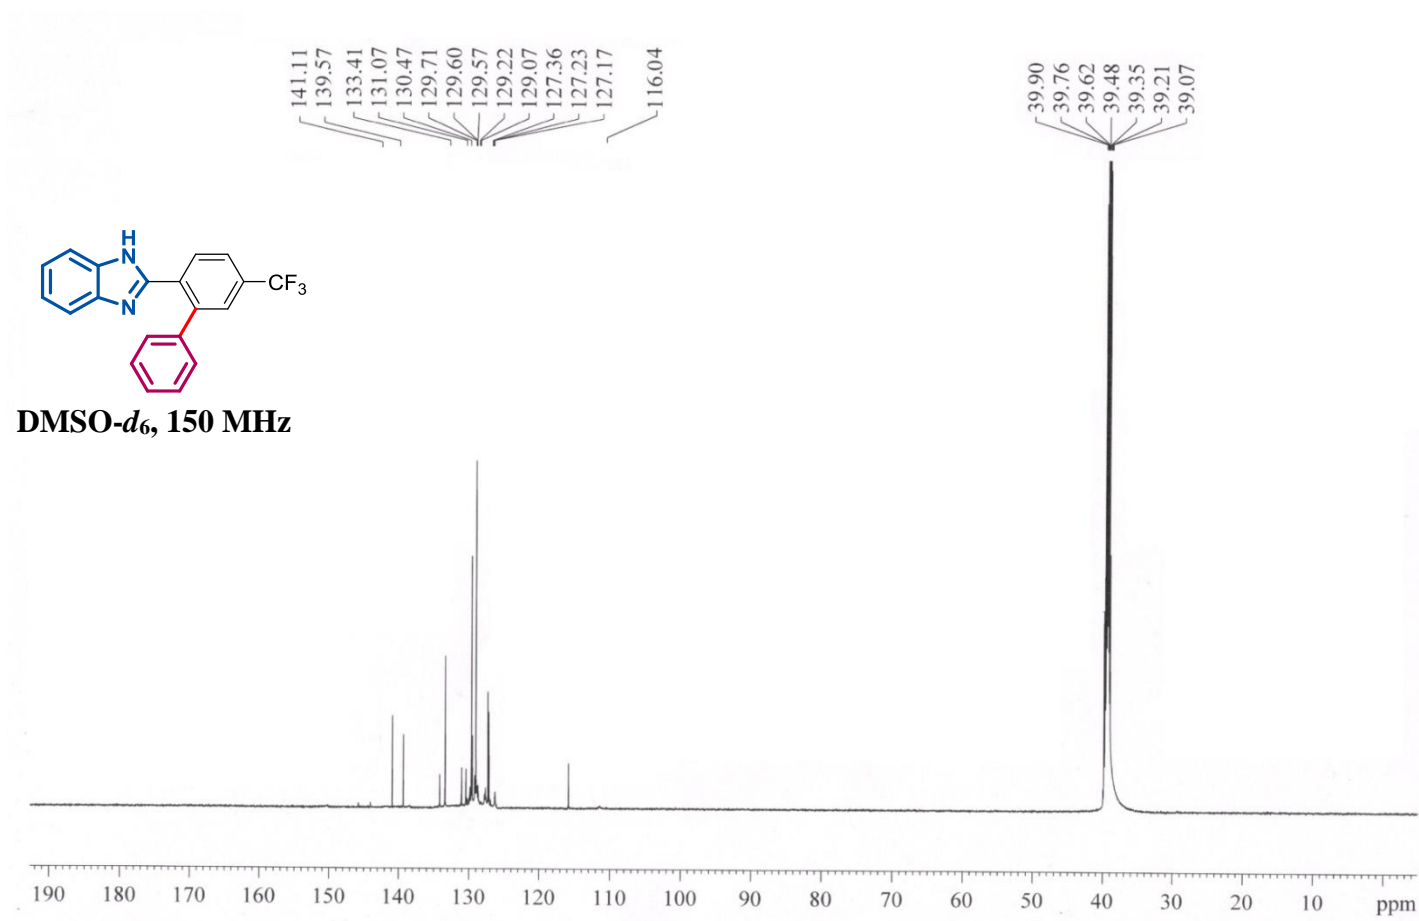

# <sup>1</sup>H NMR of Compound 3f

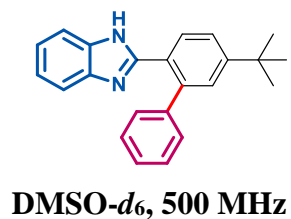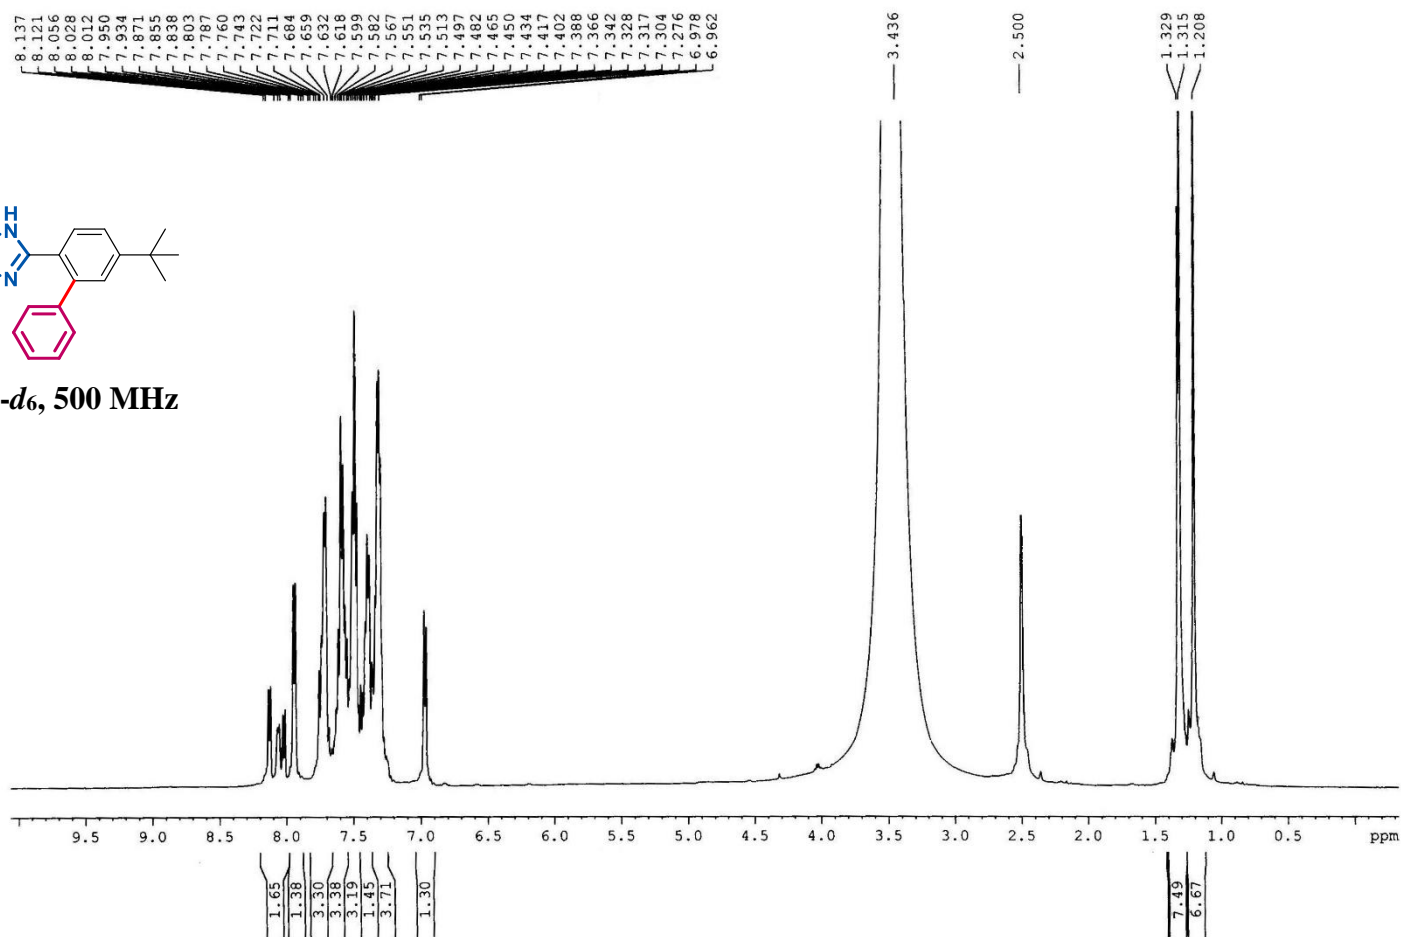

# <sup>13</sup>C NMR of Compound 3f

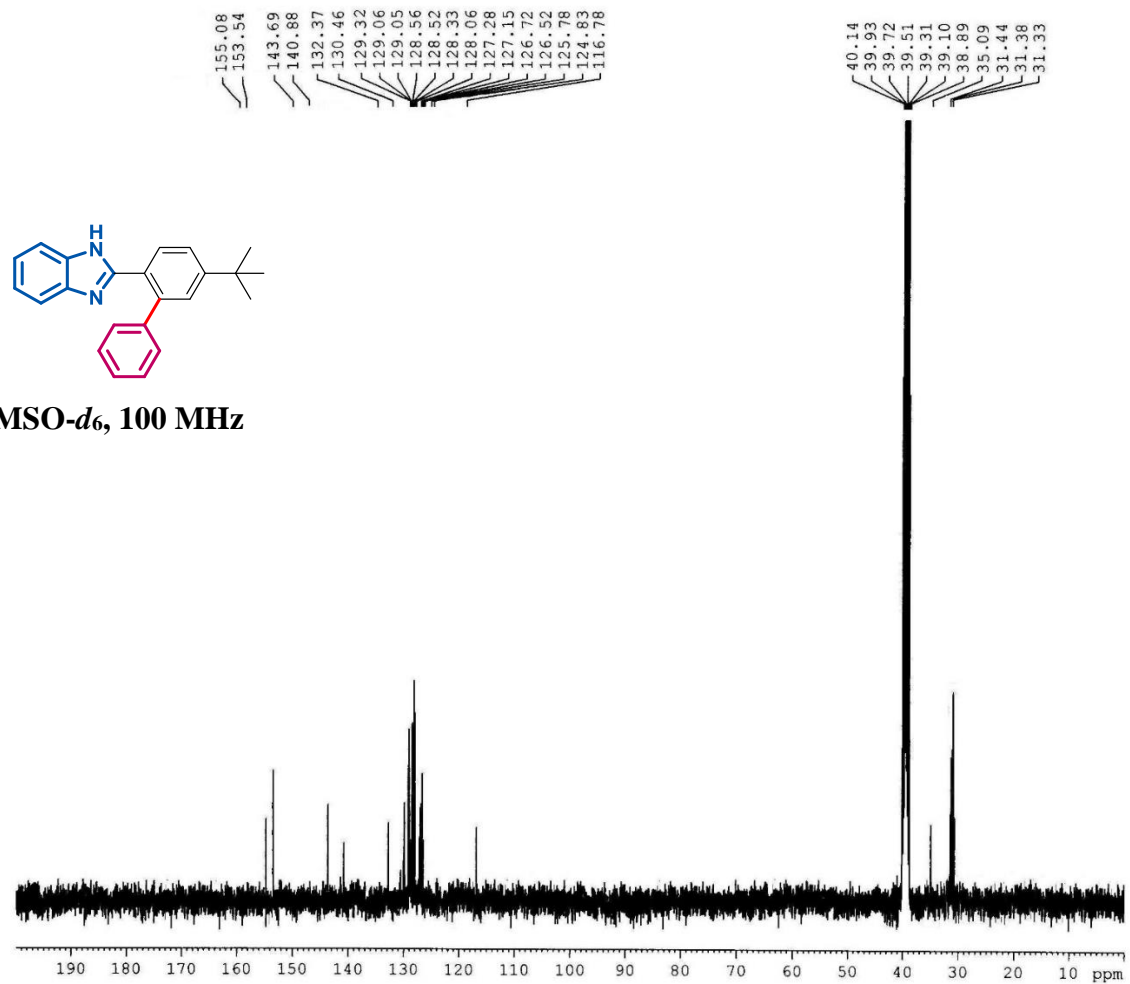

# <sup>1</sup>H NMR of Compound 4a

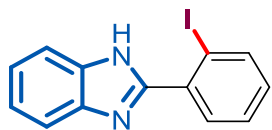

DMSO-*d*<sub>6</sub>, 300 MHz

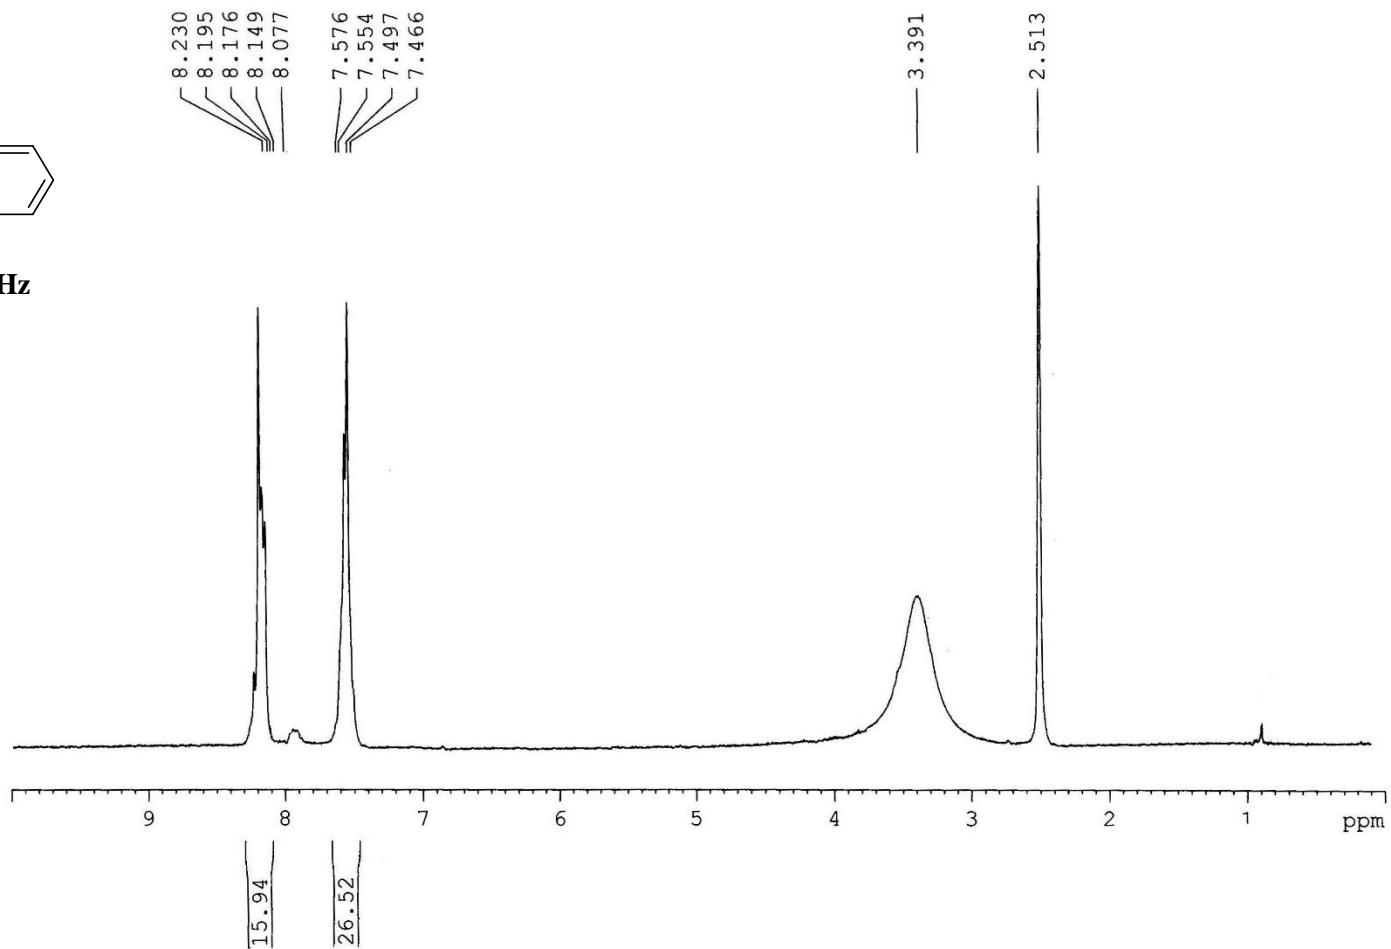



# <sup>13</sup>C NMR of Compound 4a

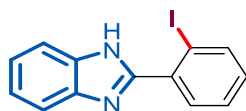

DMSO-*d*<sub>6</sub>, 75 MHz

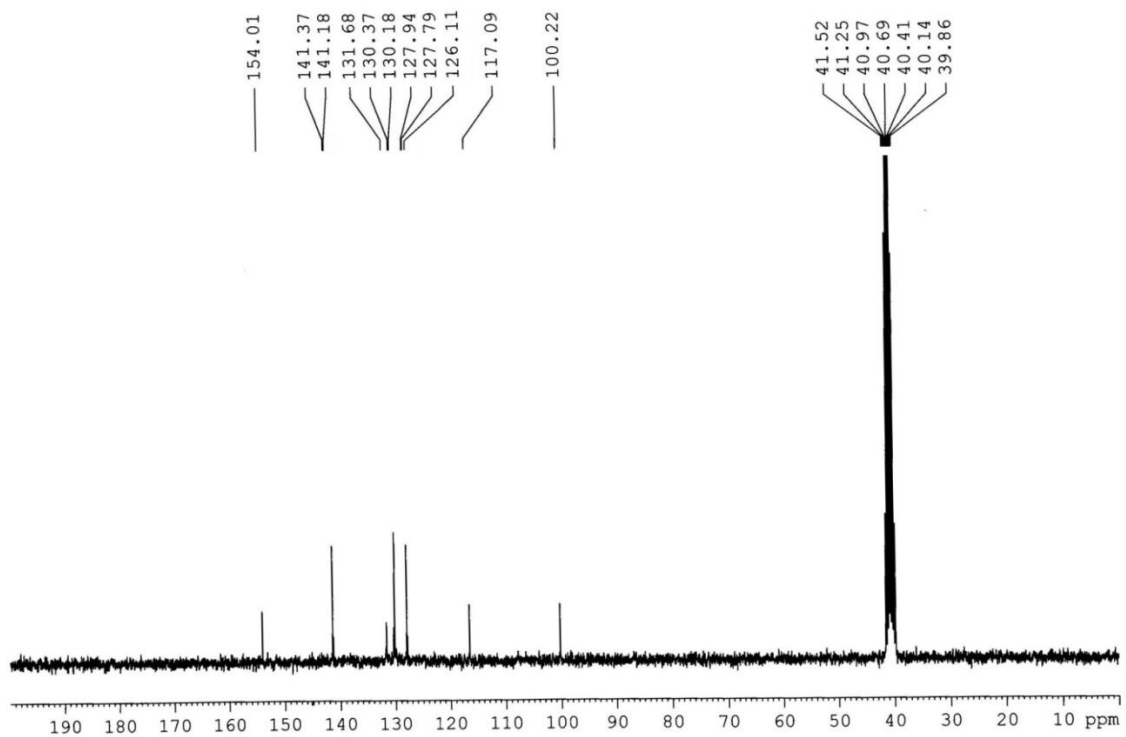

# <sup>1</sup>H NMR of Compound 4b

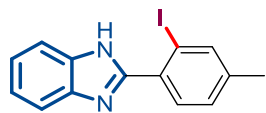

DMSO-*d*<sub>6</sub>, 300 MHz

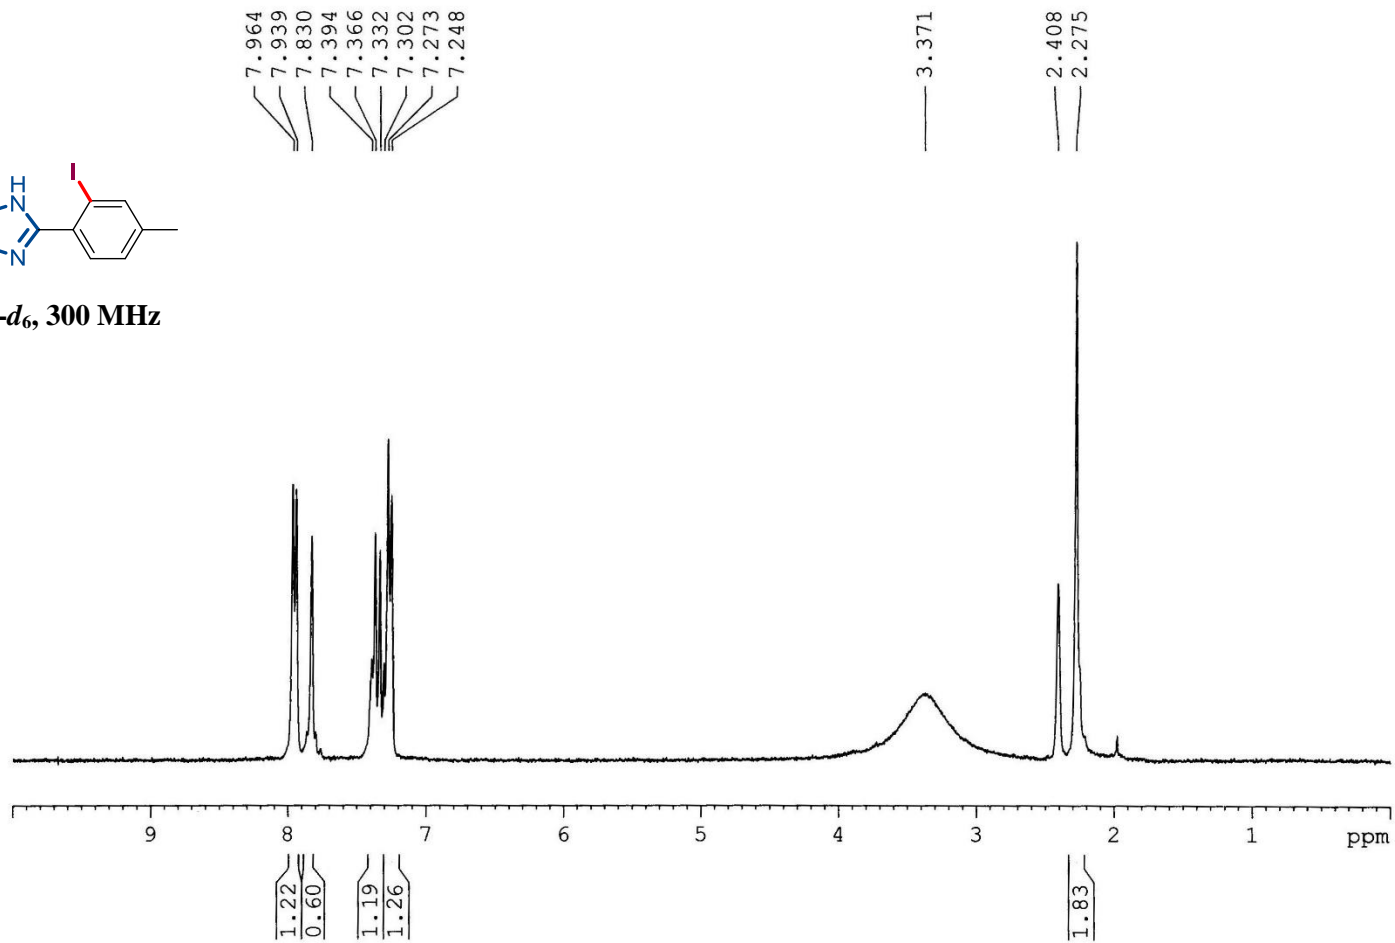

# <sup>13</sup>C NMR of Compound 4b

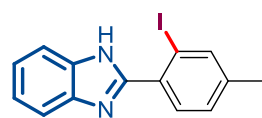

DMSO-*d*<sub>6</sub>, 75 MHz

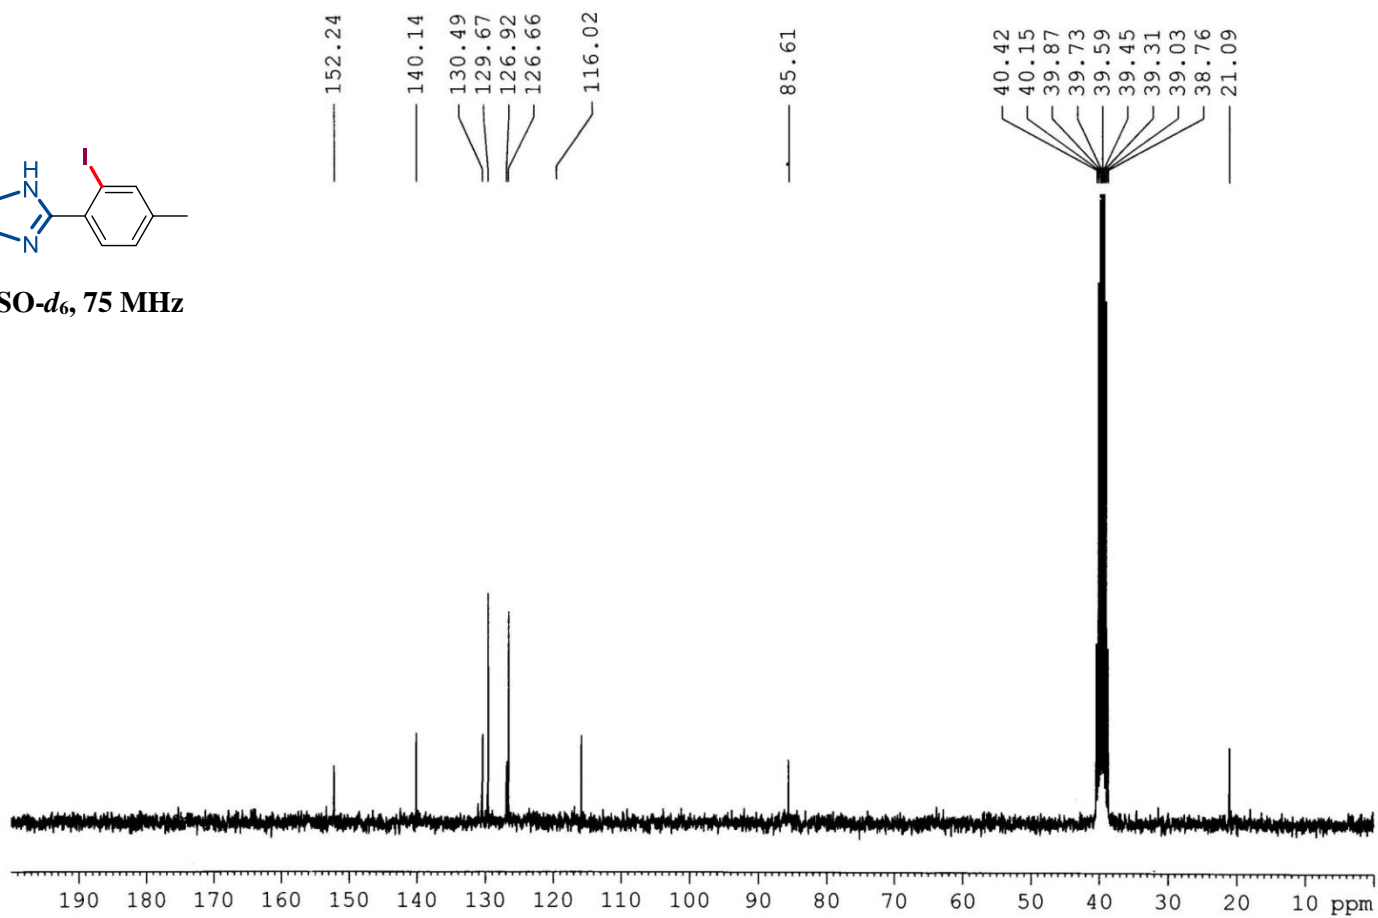

# <sup>1</sup>H NMR of Compound 4c

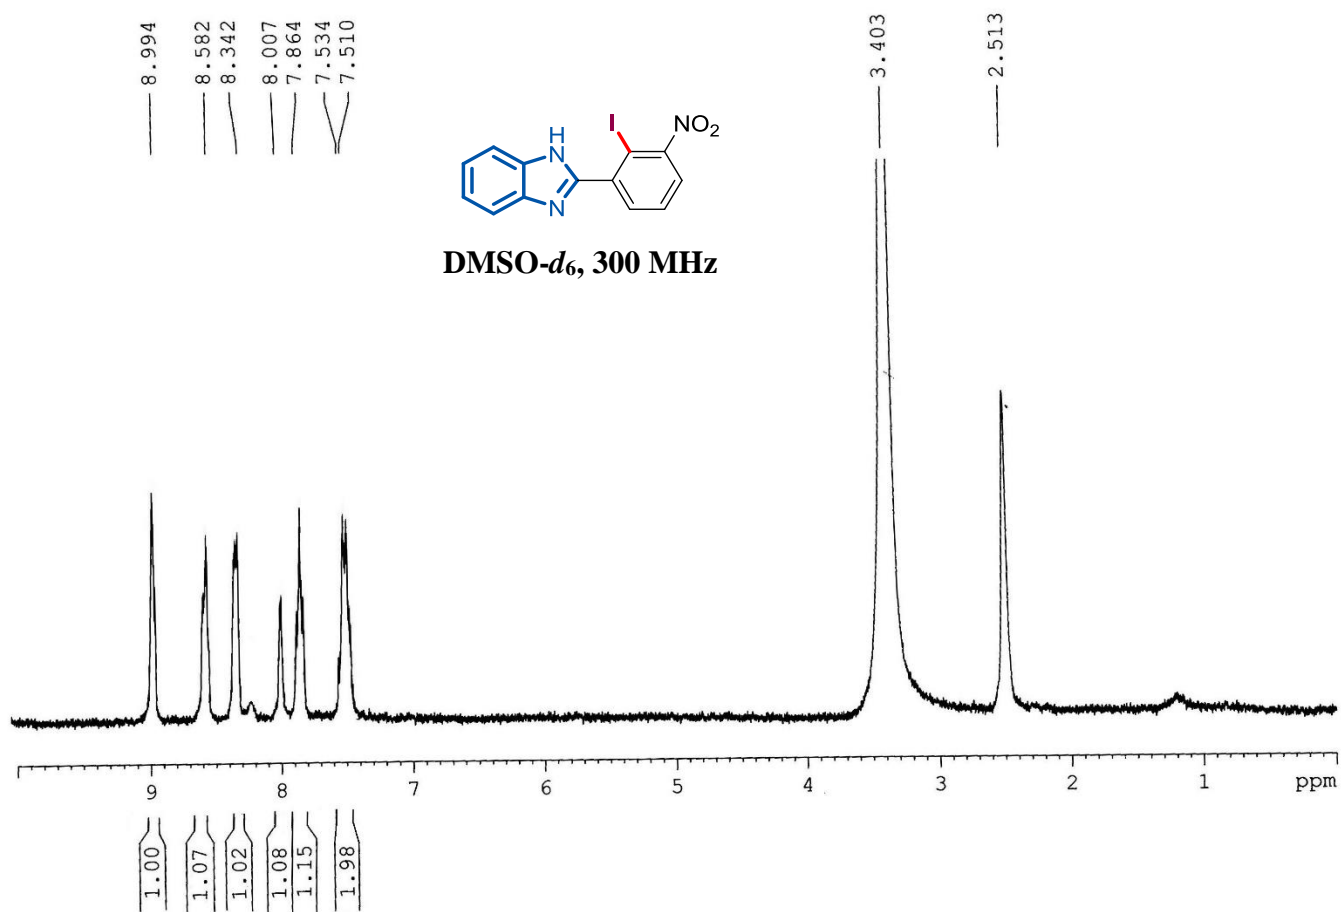

# <sup>13</sup>C NMR of Compound 4c

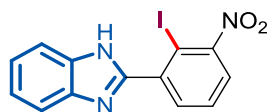

DMSO-*d*<sub>6</sub>, 75 MHz

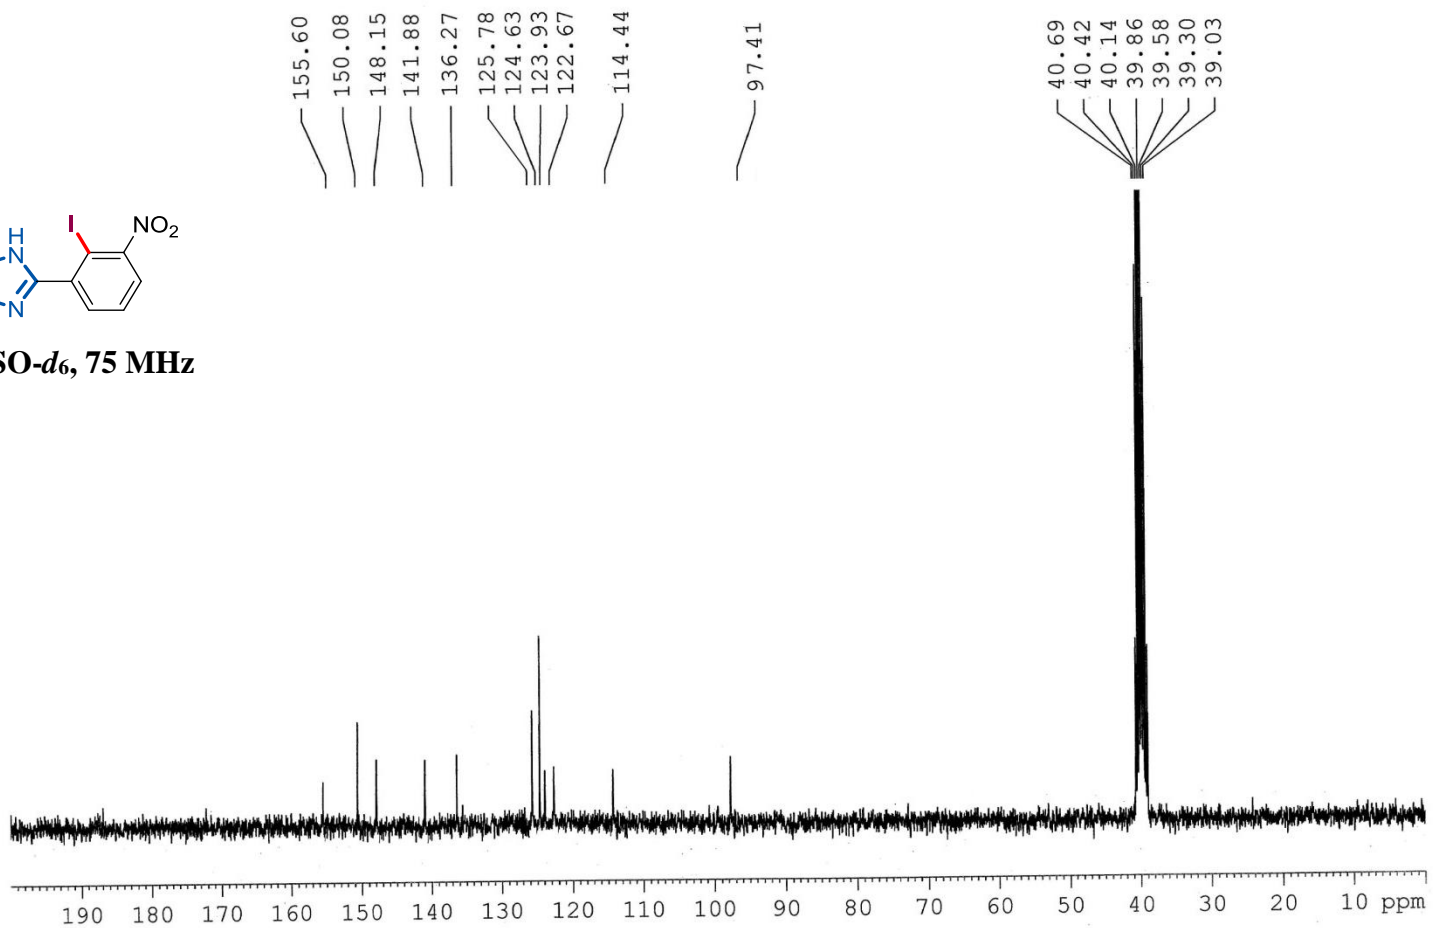

# <sup>1</sup>H NMR of Compound 4d

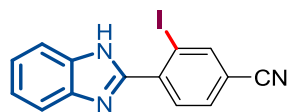

DMSO-*d*<sub>6</sub>, 300 MHz

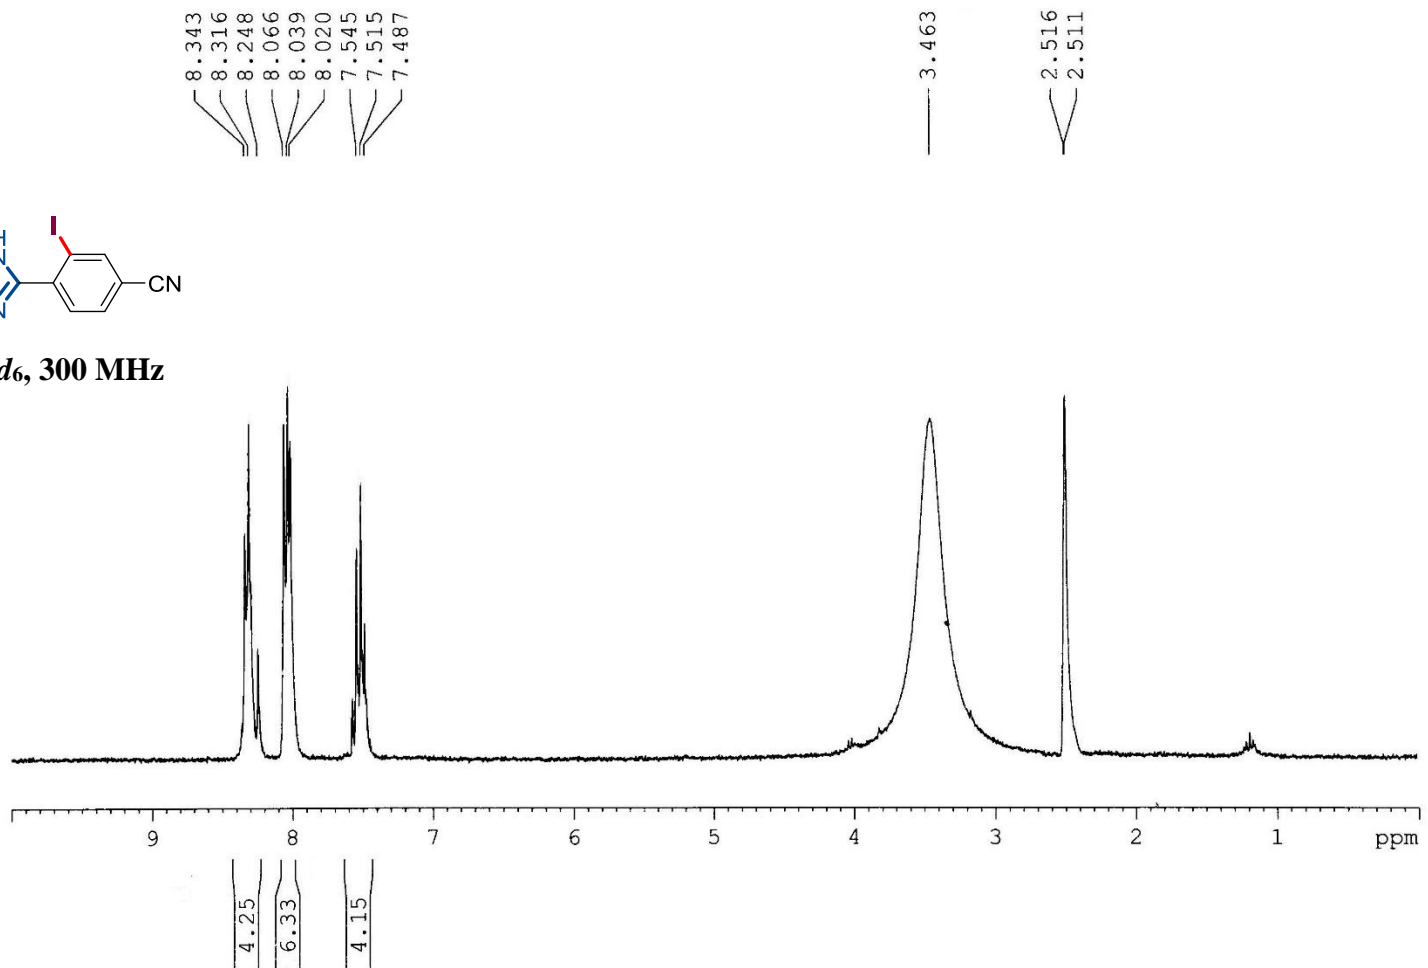

# <sup>13</sup>C NMR of Compound 4d

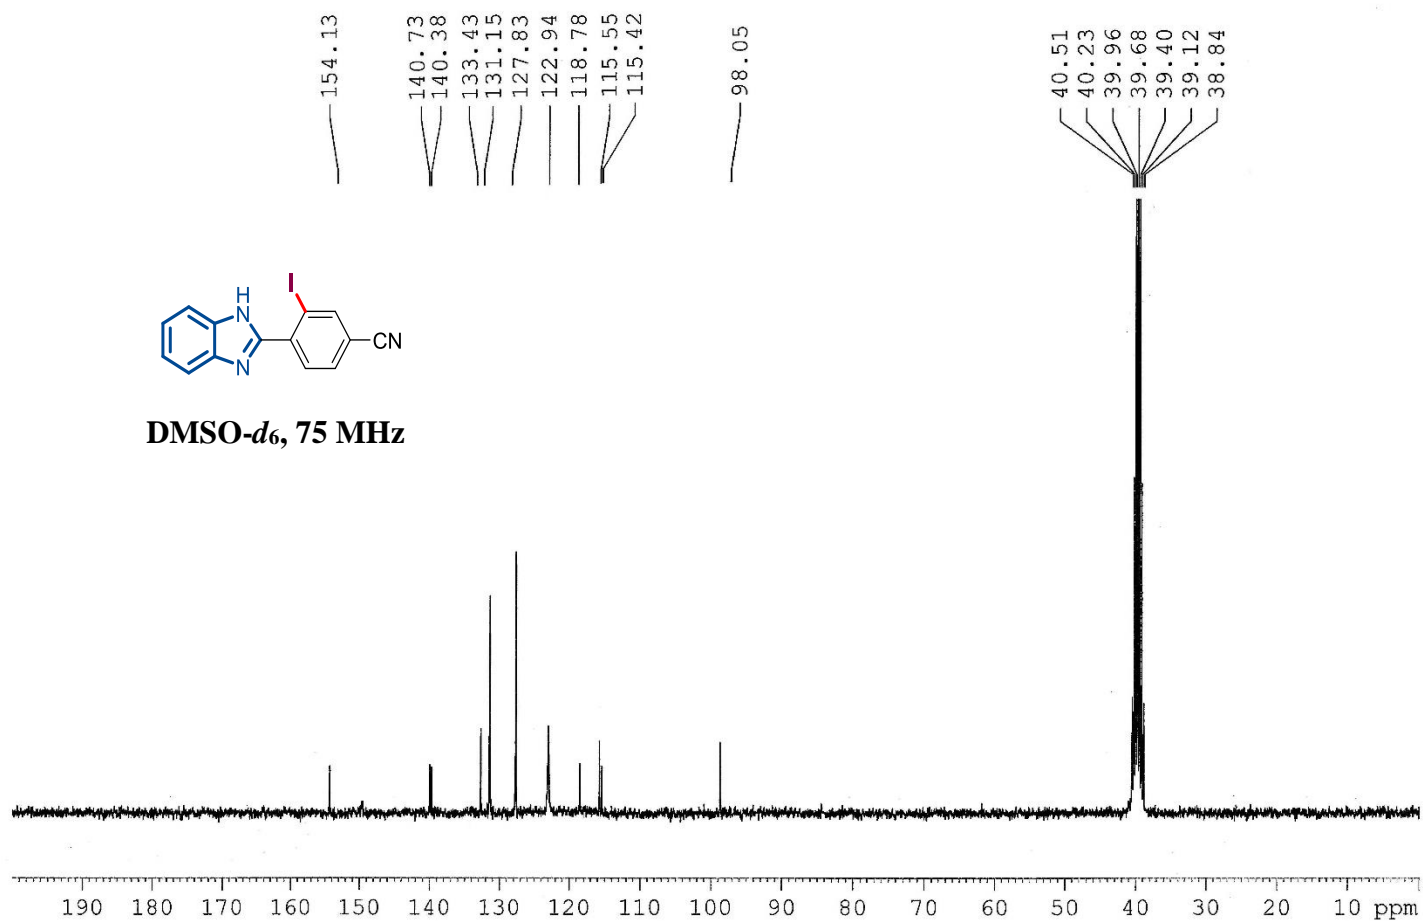

# <sup>1</sup>H NMR of Compound 4e

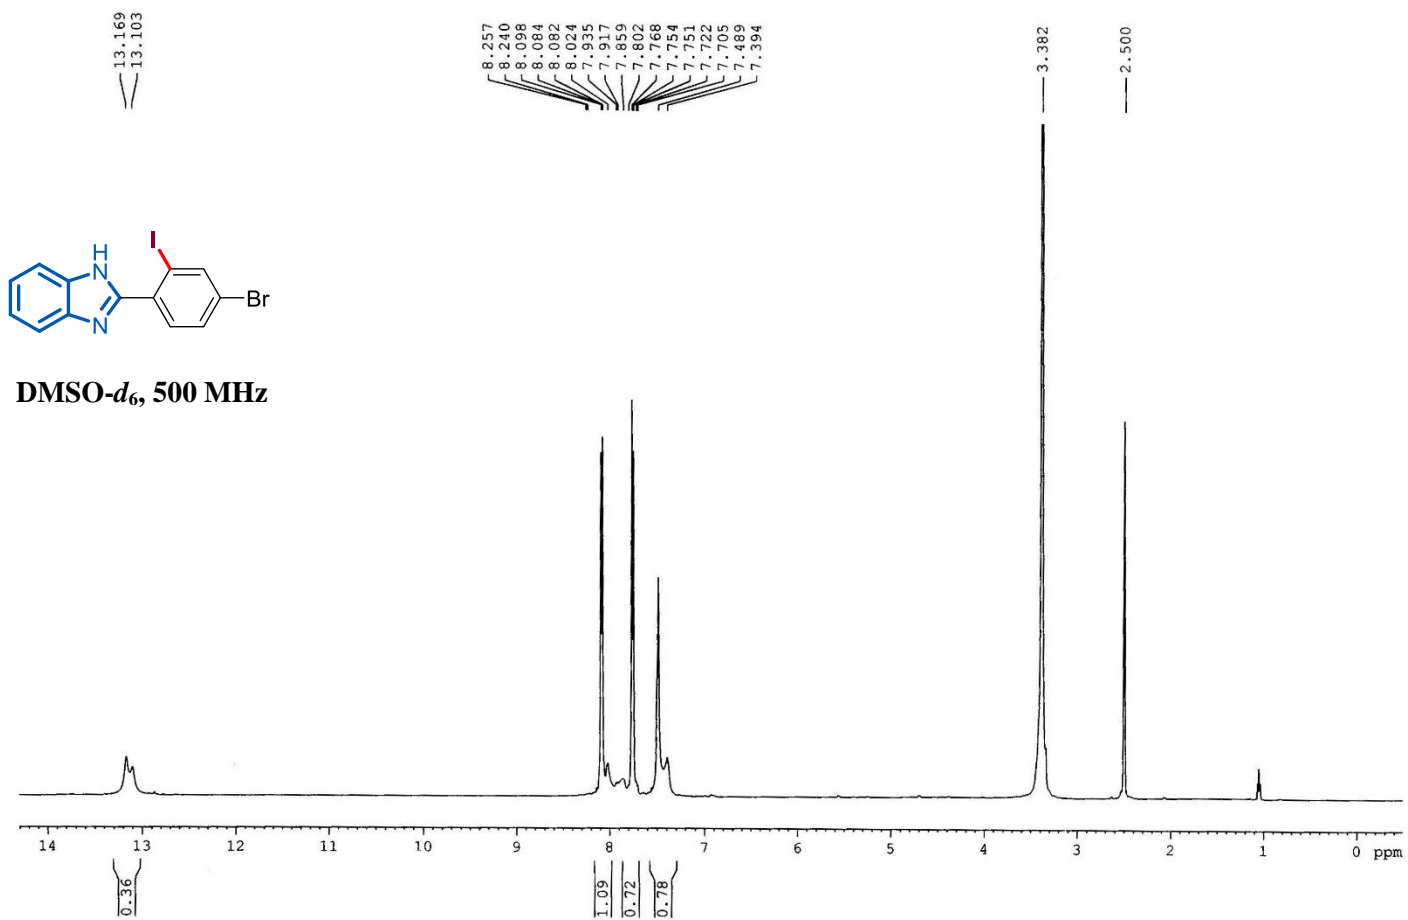



# <sup>13</sup>C NMR of Compound 4e

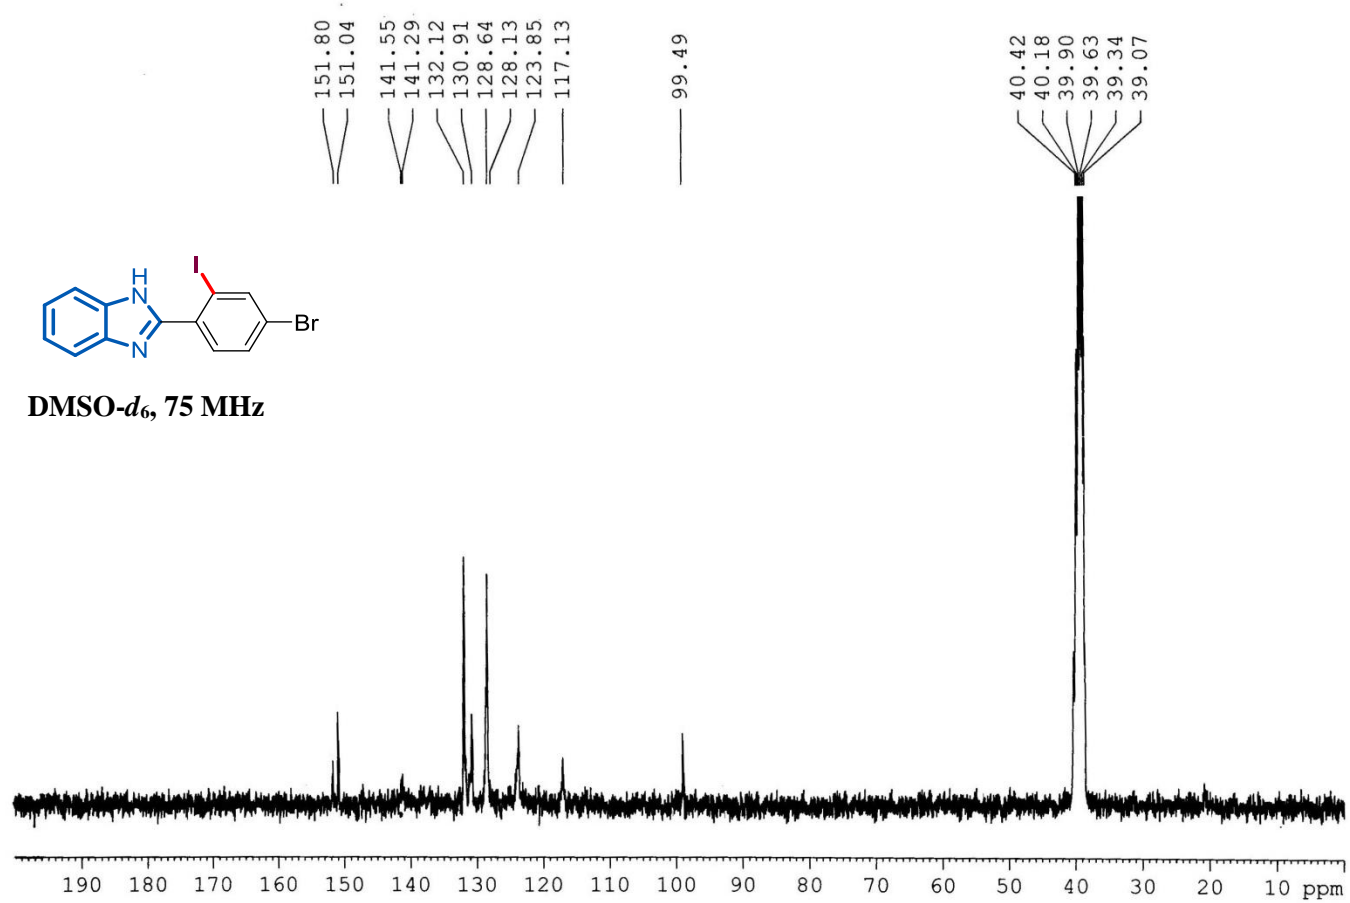

# <sup>1</sup>H NMR of Compound 4f

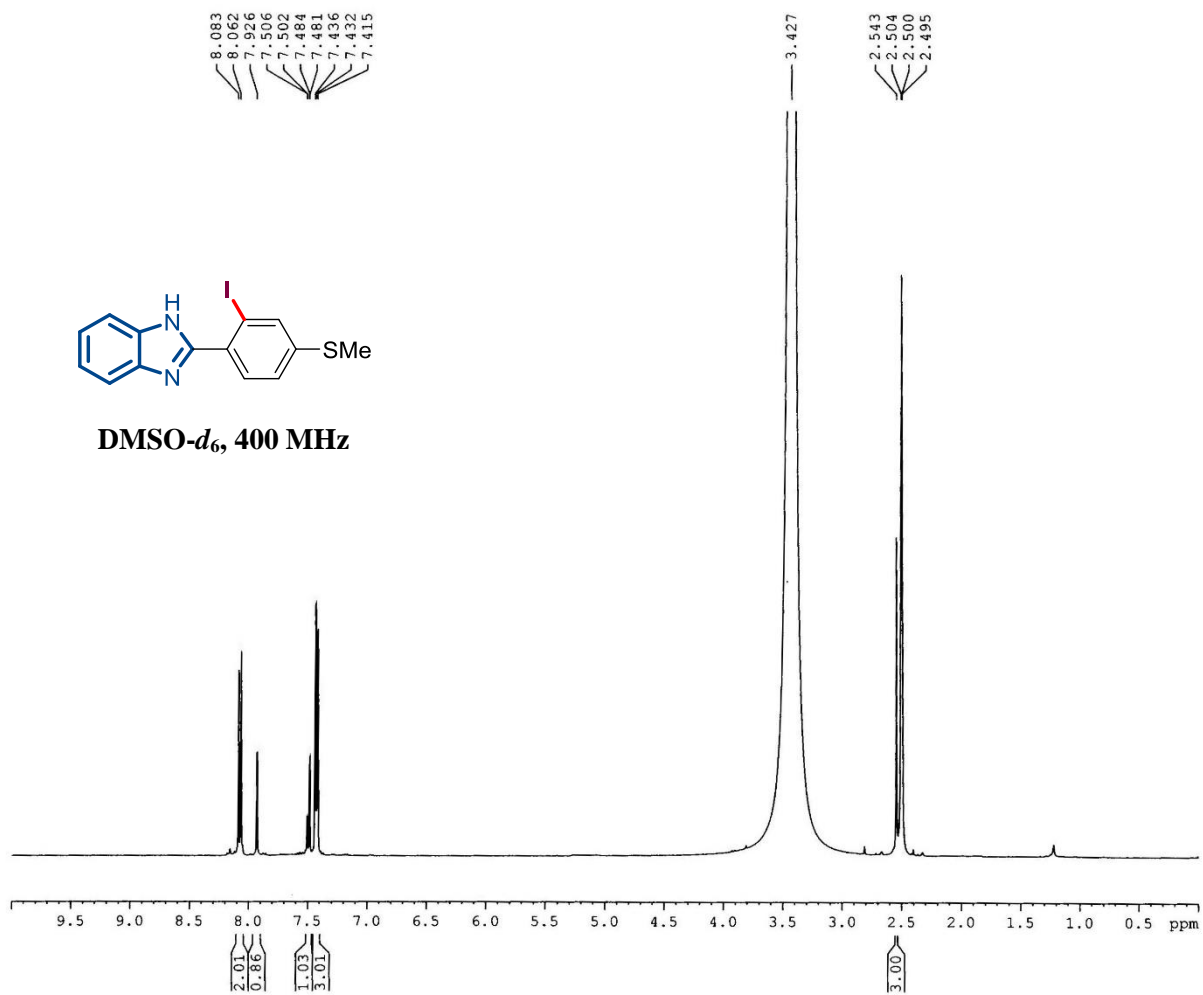

# <sup>13</sup>C NMR of Compound 4f

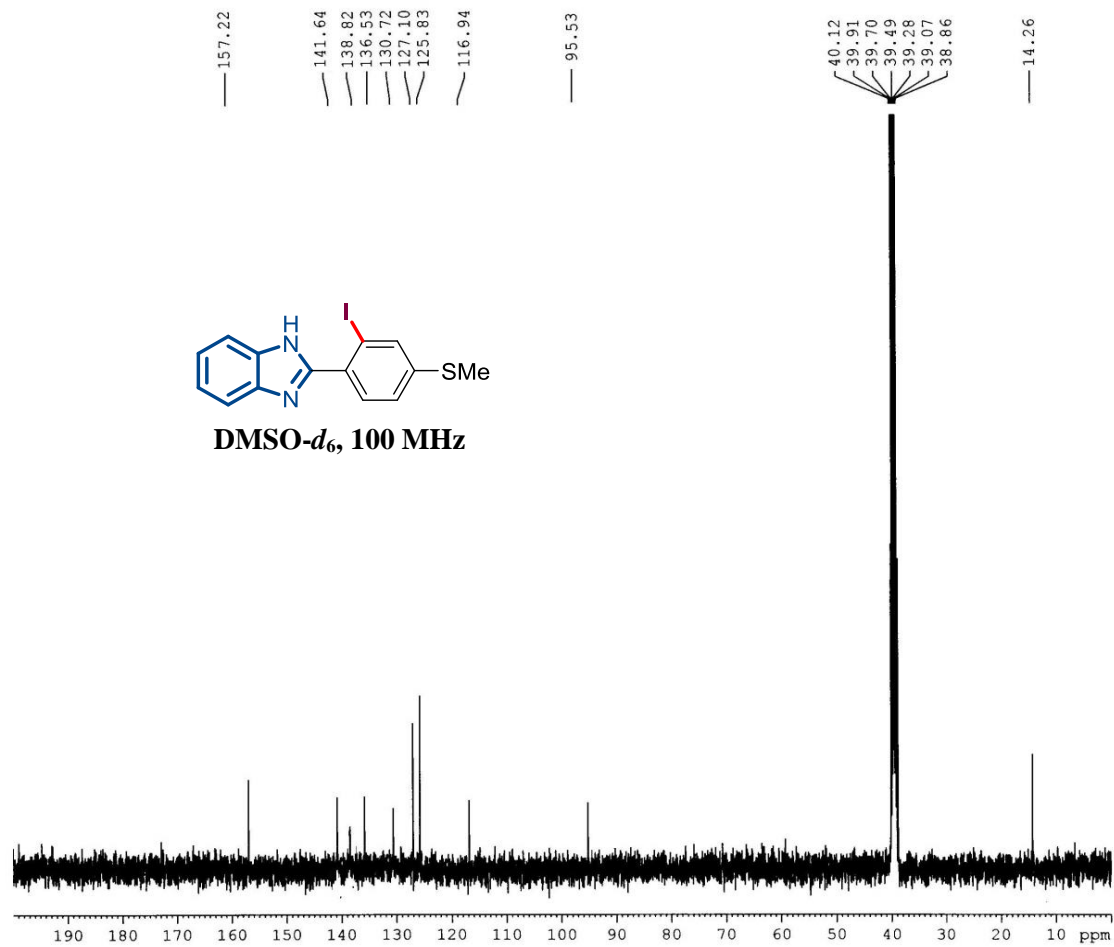

# <sup>1</sup>H NMR of Compound 4g

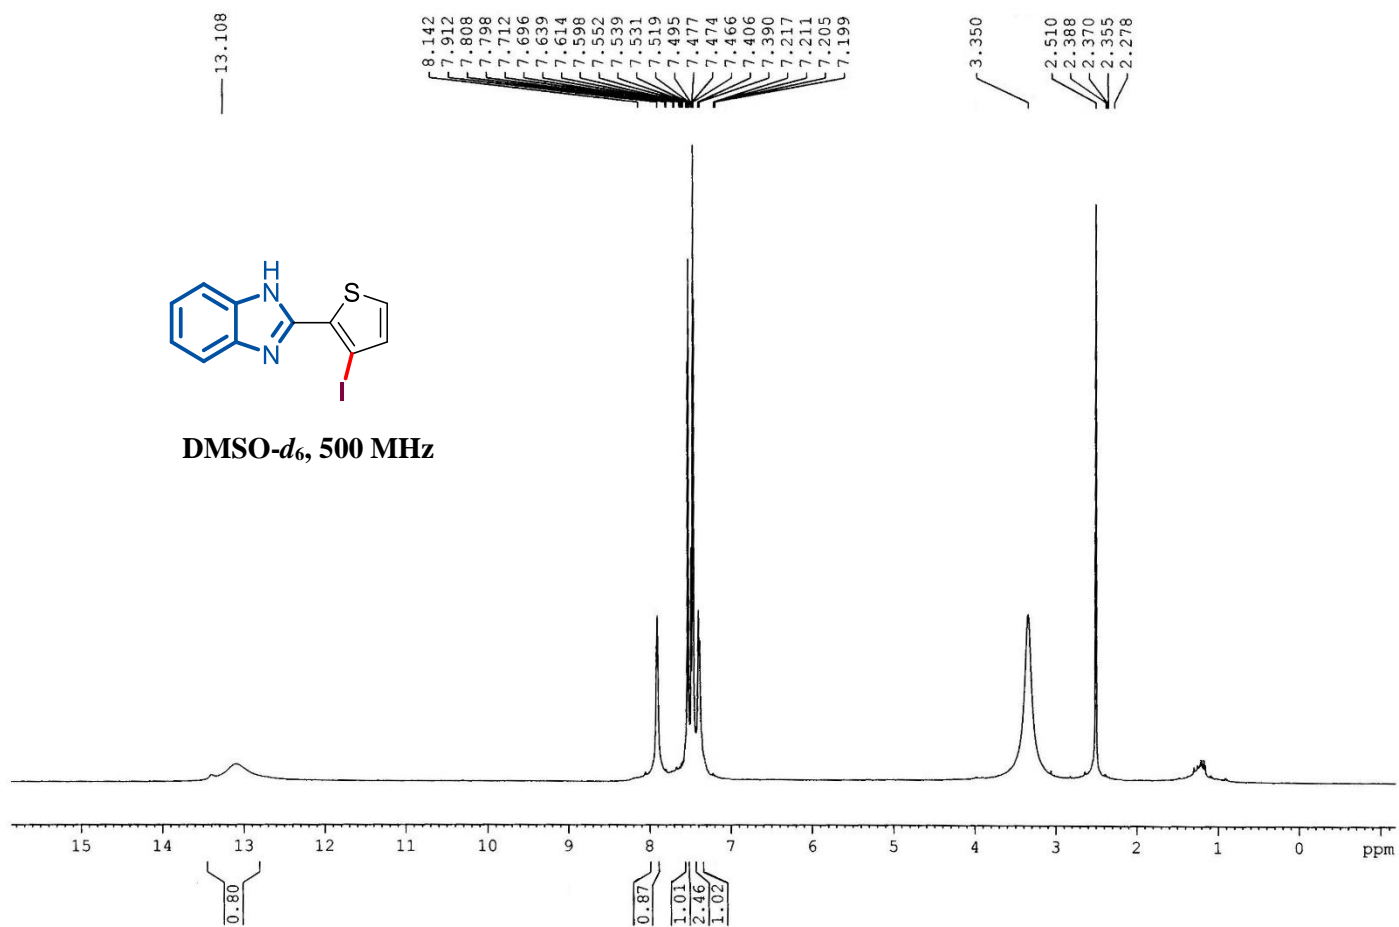

# <sup>13</sup>C NMR of Compound 4g

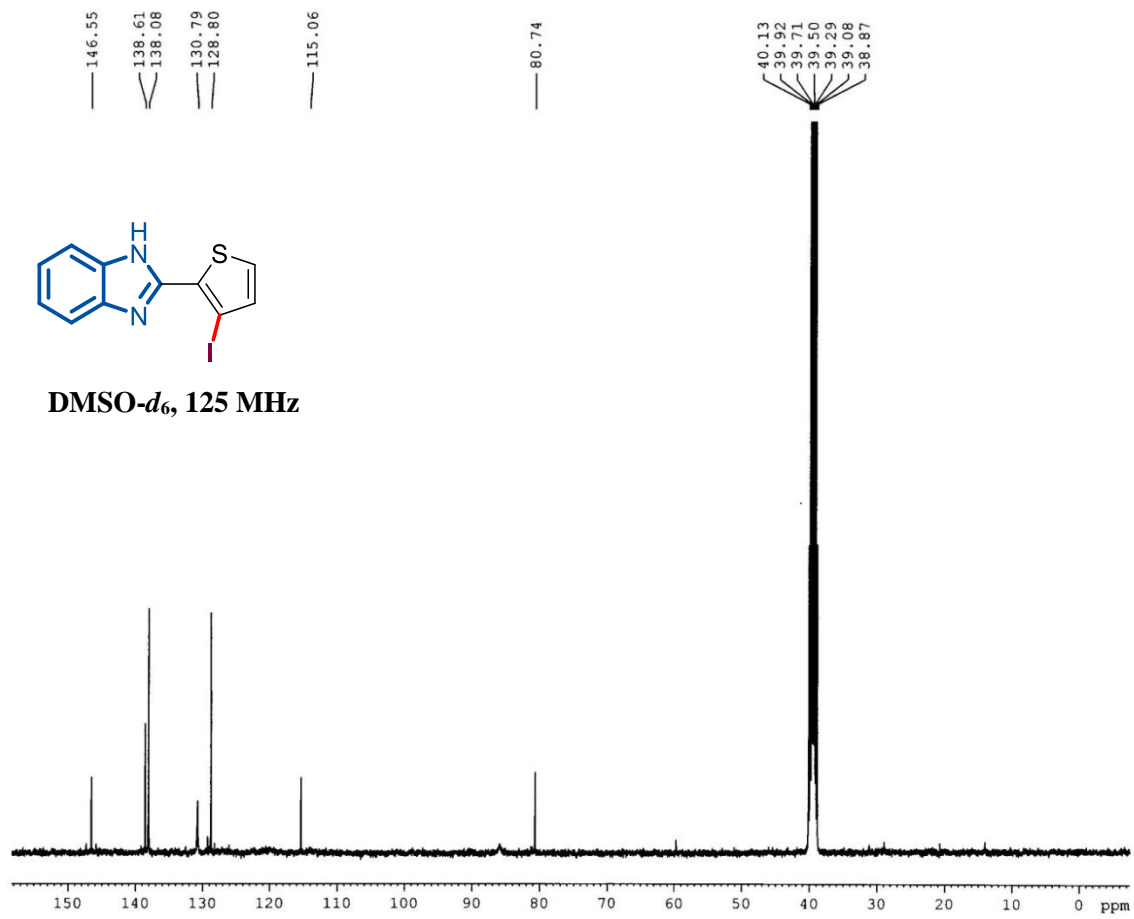

# <sup>1</sup>H NMR of Compound 4h

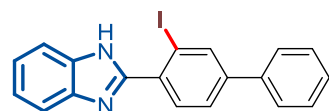

DMSO-*d*<sub>6</sub>, 400 MHz

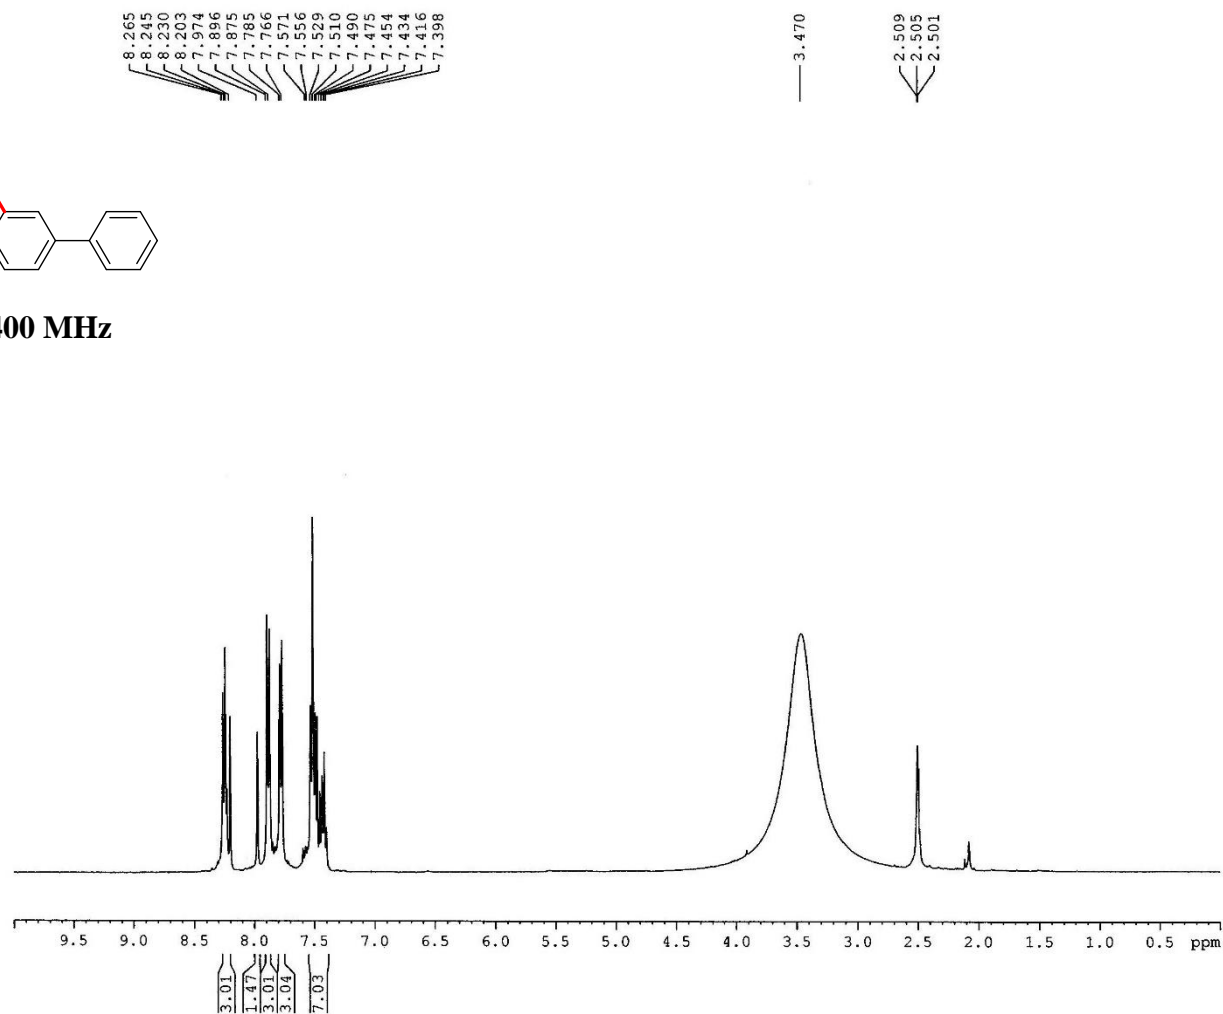

# <sup>13</sup>C NMR of Compound 4h

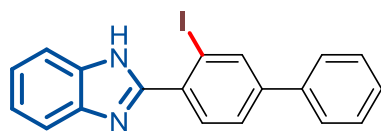

DMSO-*d*<sub>6</sub>, 100 MHz

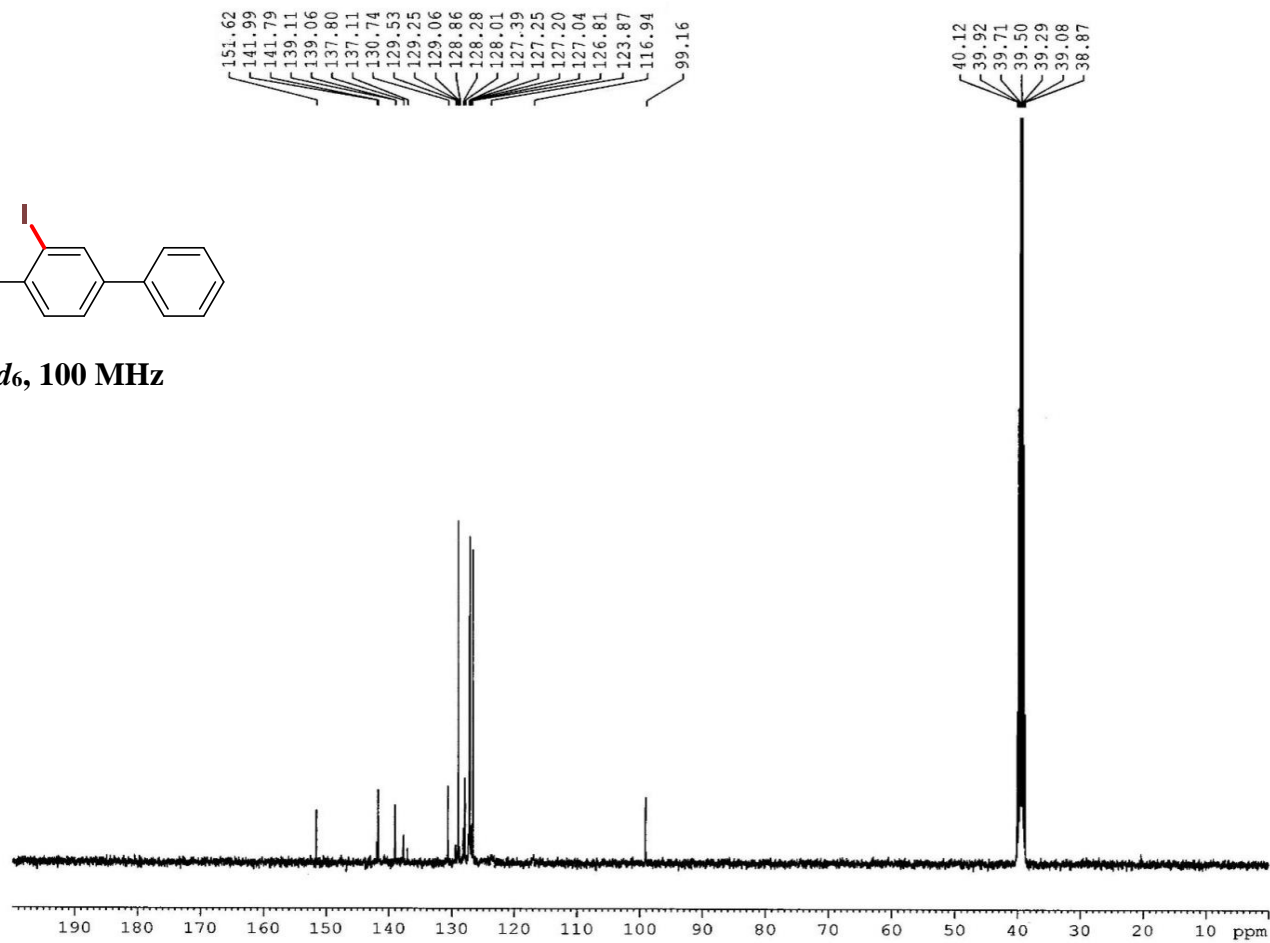

# <sup>1</sup>H NMR of Compound 4i

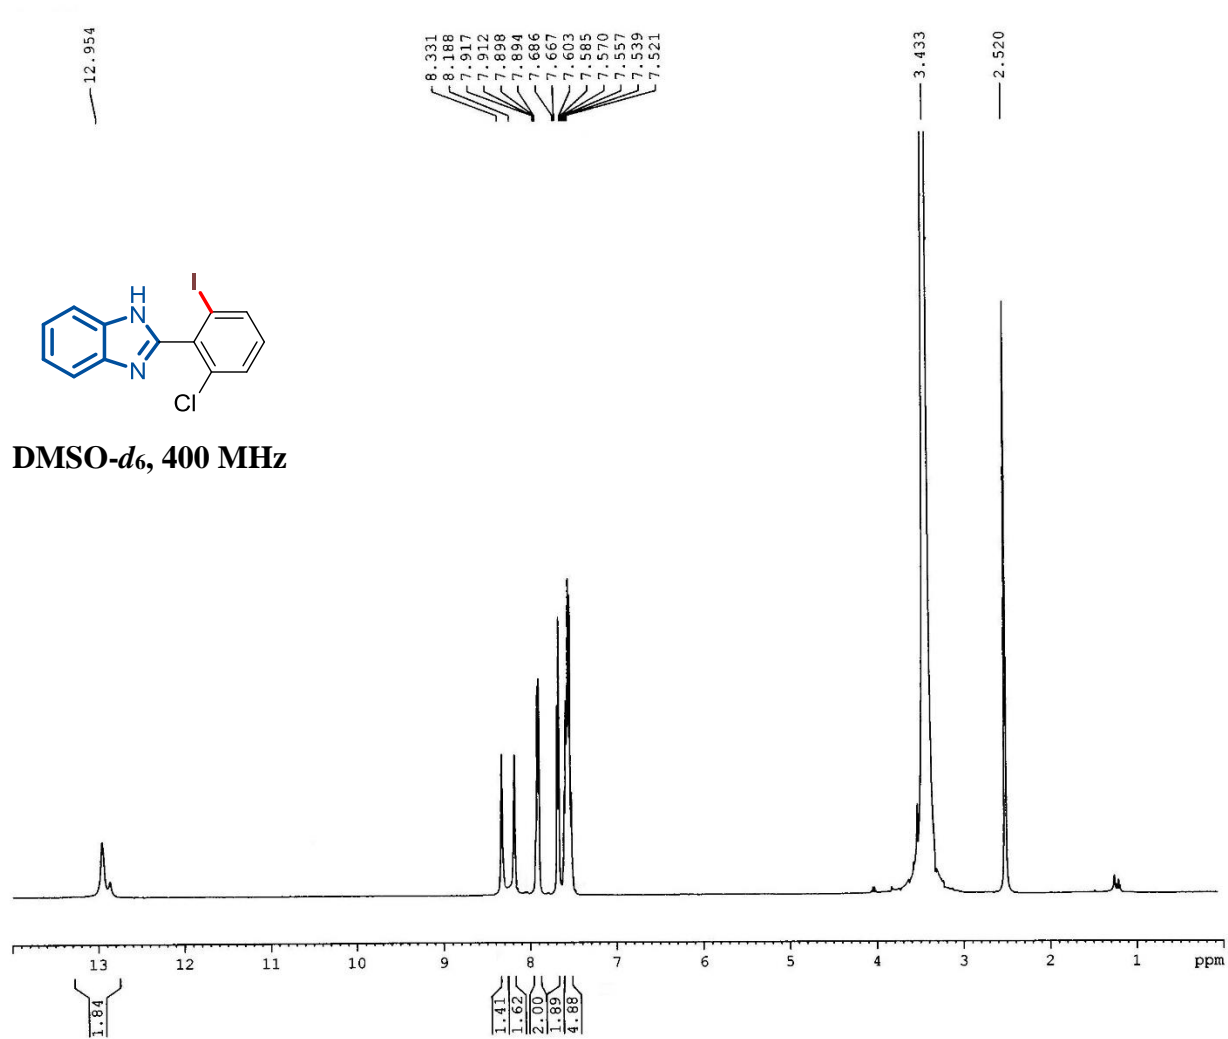



# <sup>13</sup>C NMR of Compound 4i

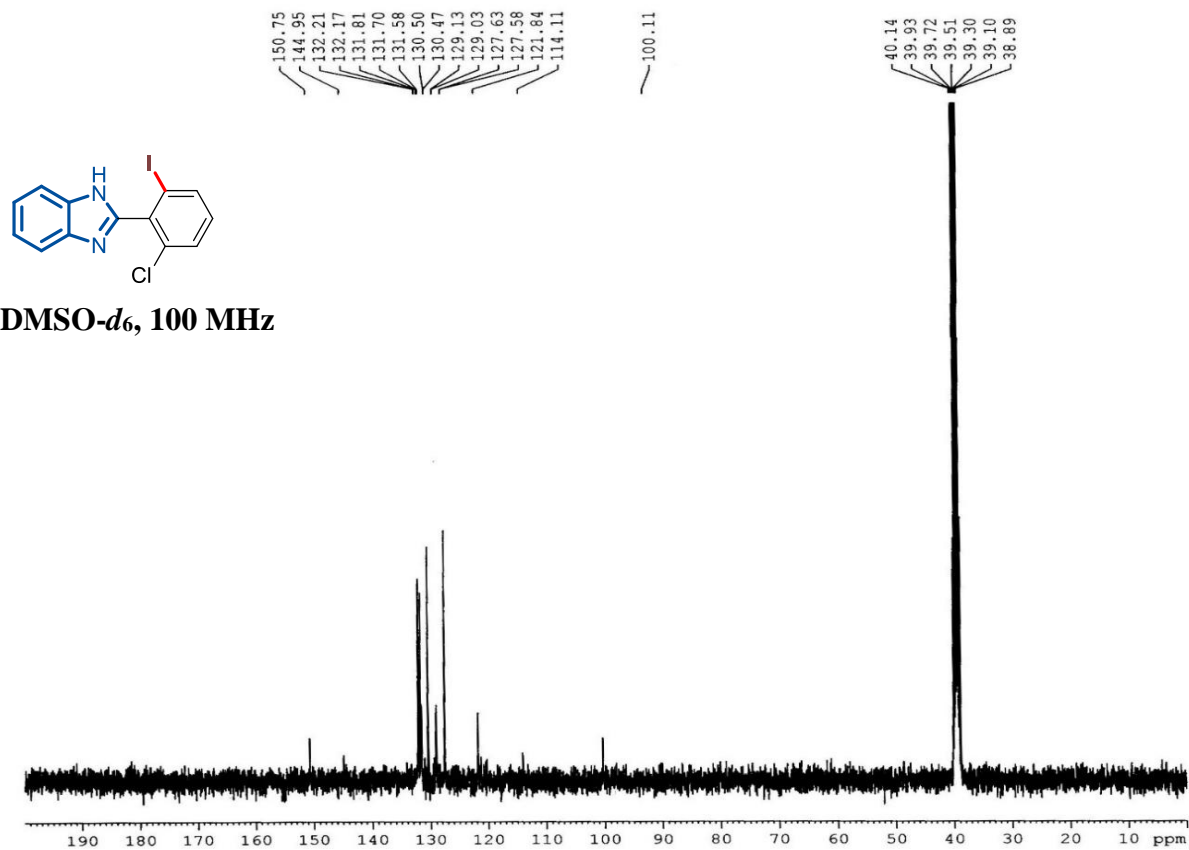

# <sup>1</sup>H NMR of Compound 4j

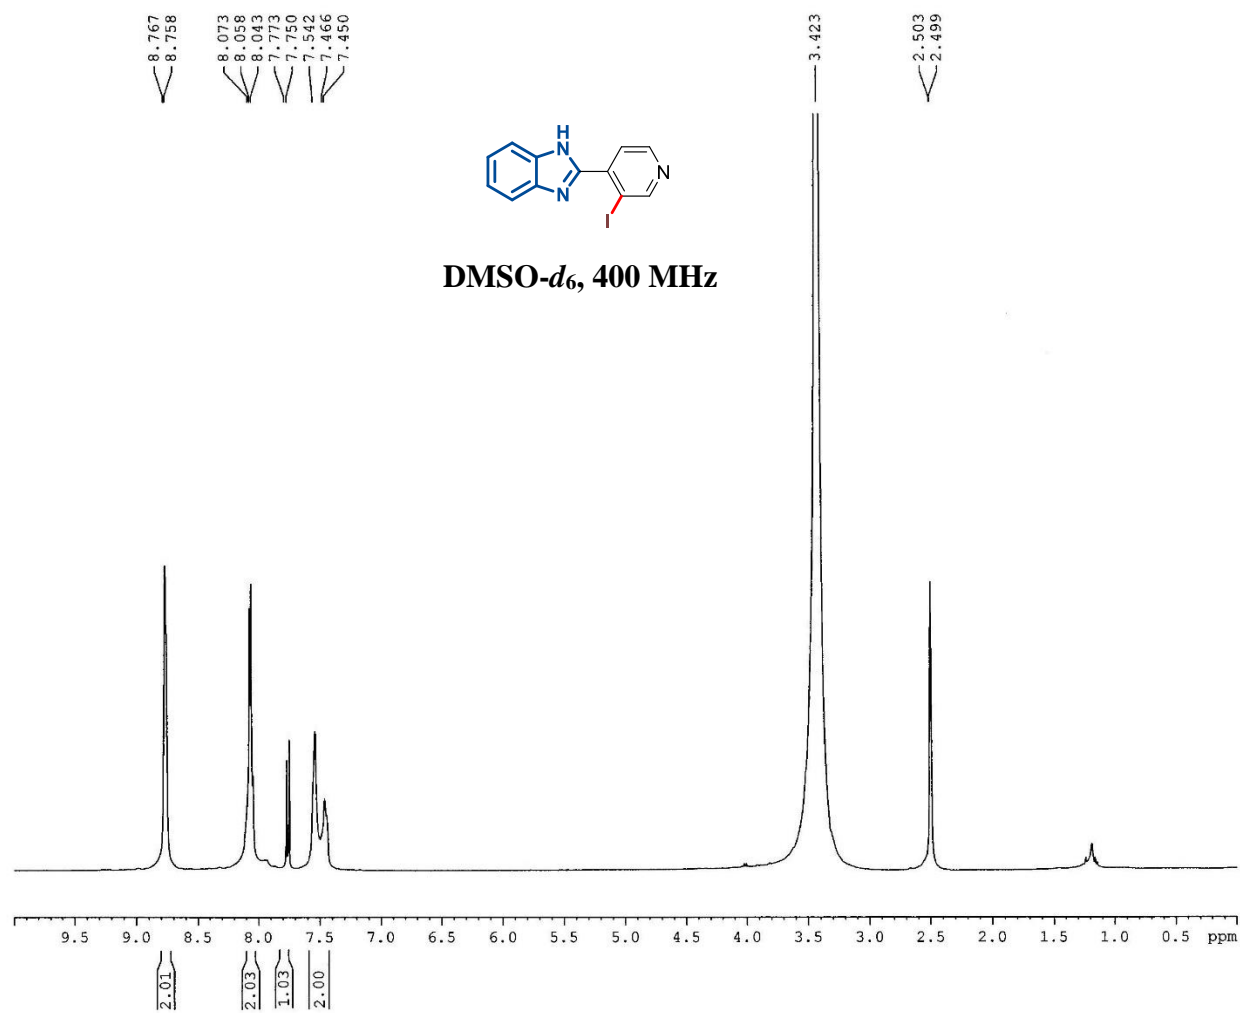

# <sup>13</sup>C NMR of Compound 4j

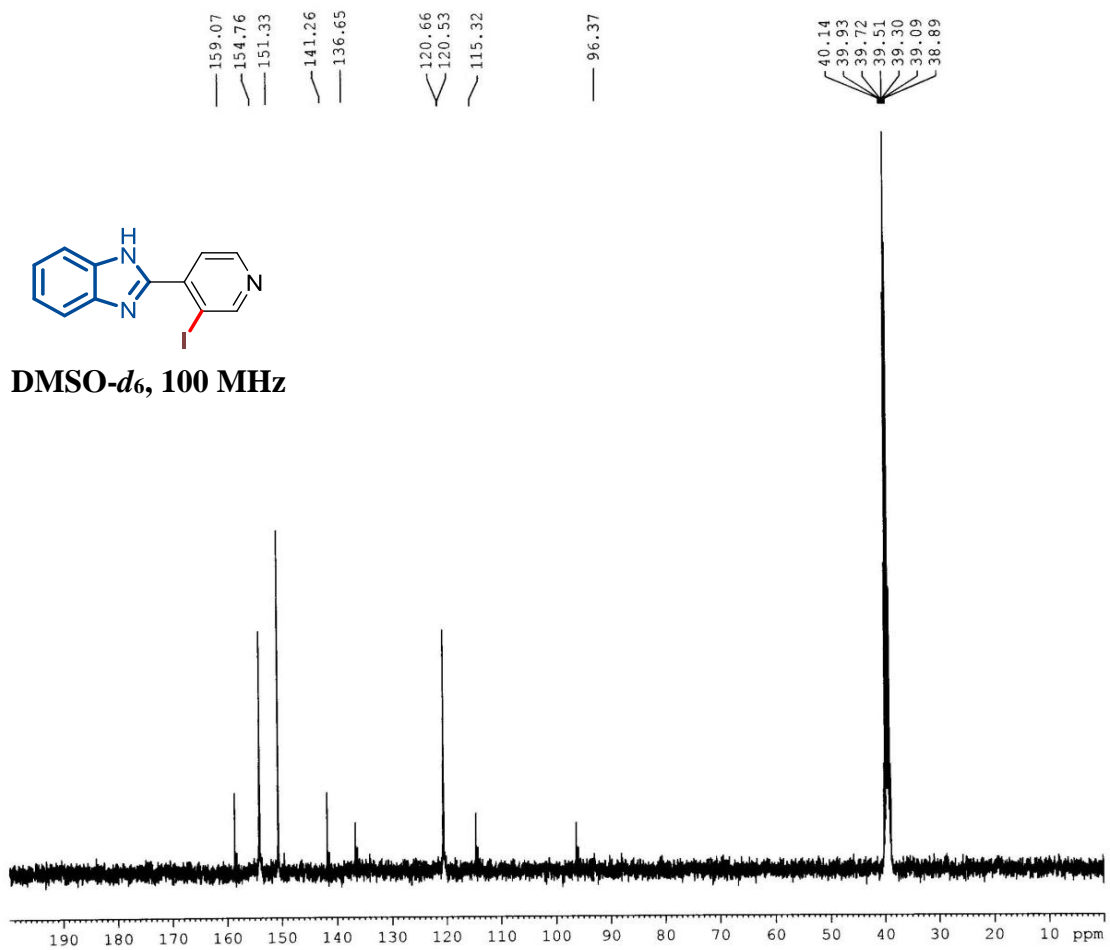

# <sup>1</sup>H NMR of Compound 4k

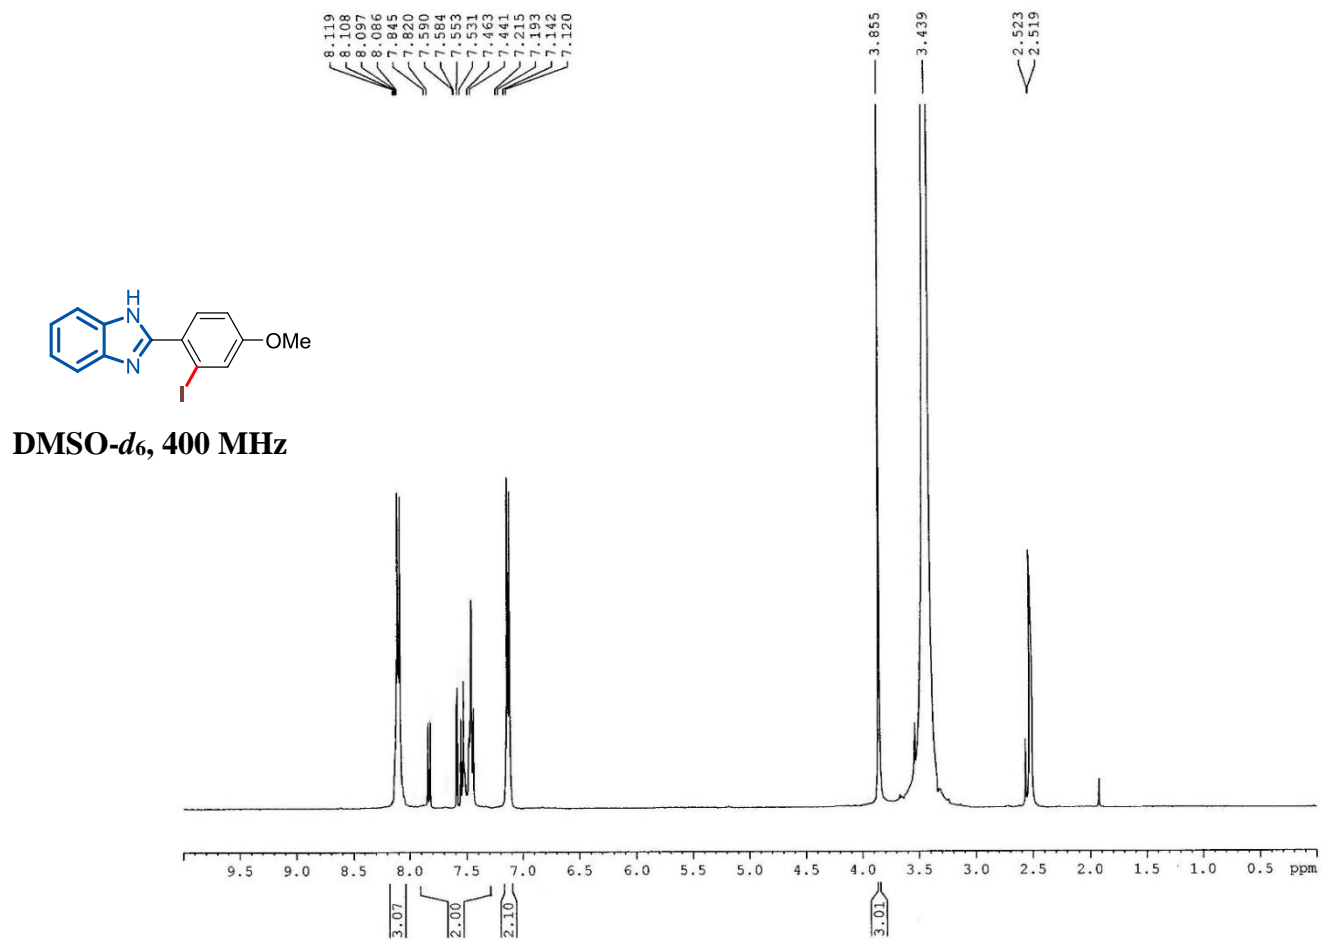

# <sup>13</sup>C NMR of Compound 4k

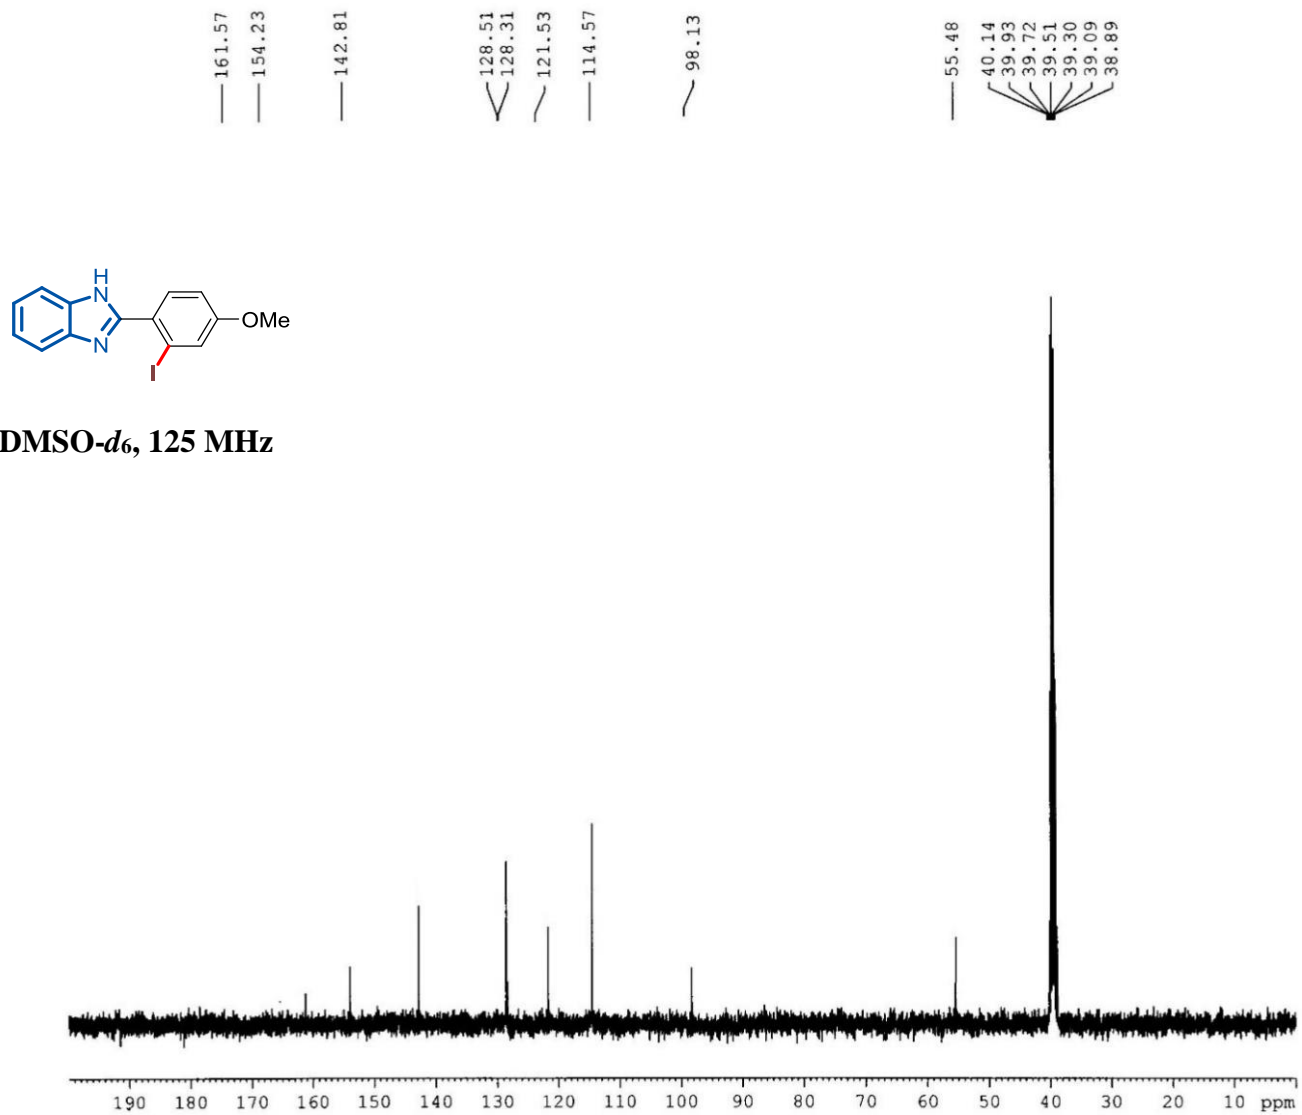

# <sup>1</sup>H NMR of Compound 4l

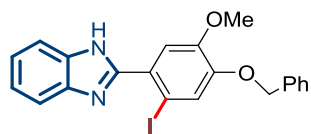

DMSO-*d*<sub>6</sub>, 600 MHz

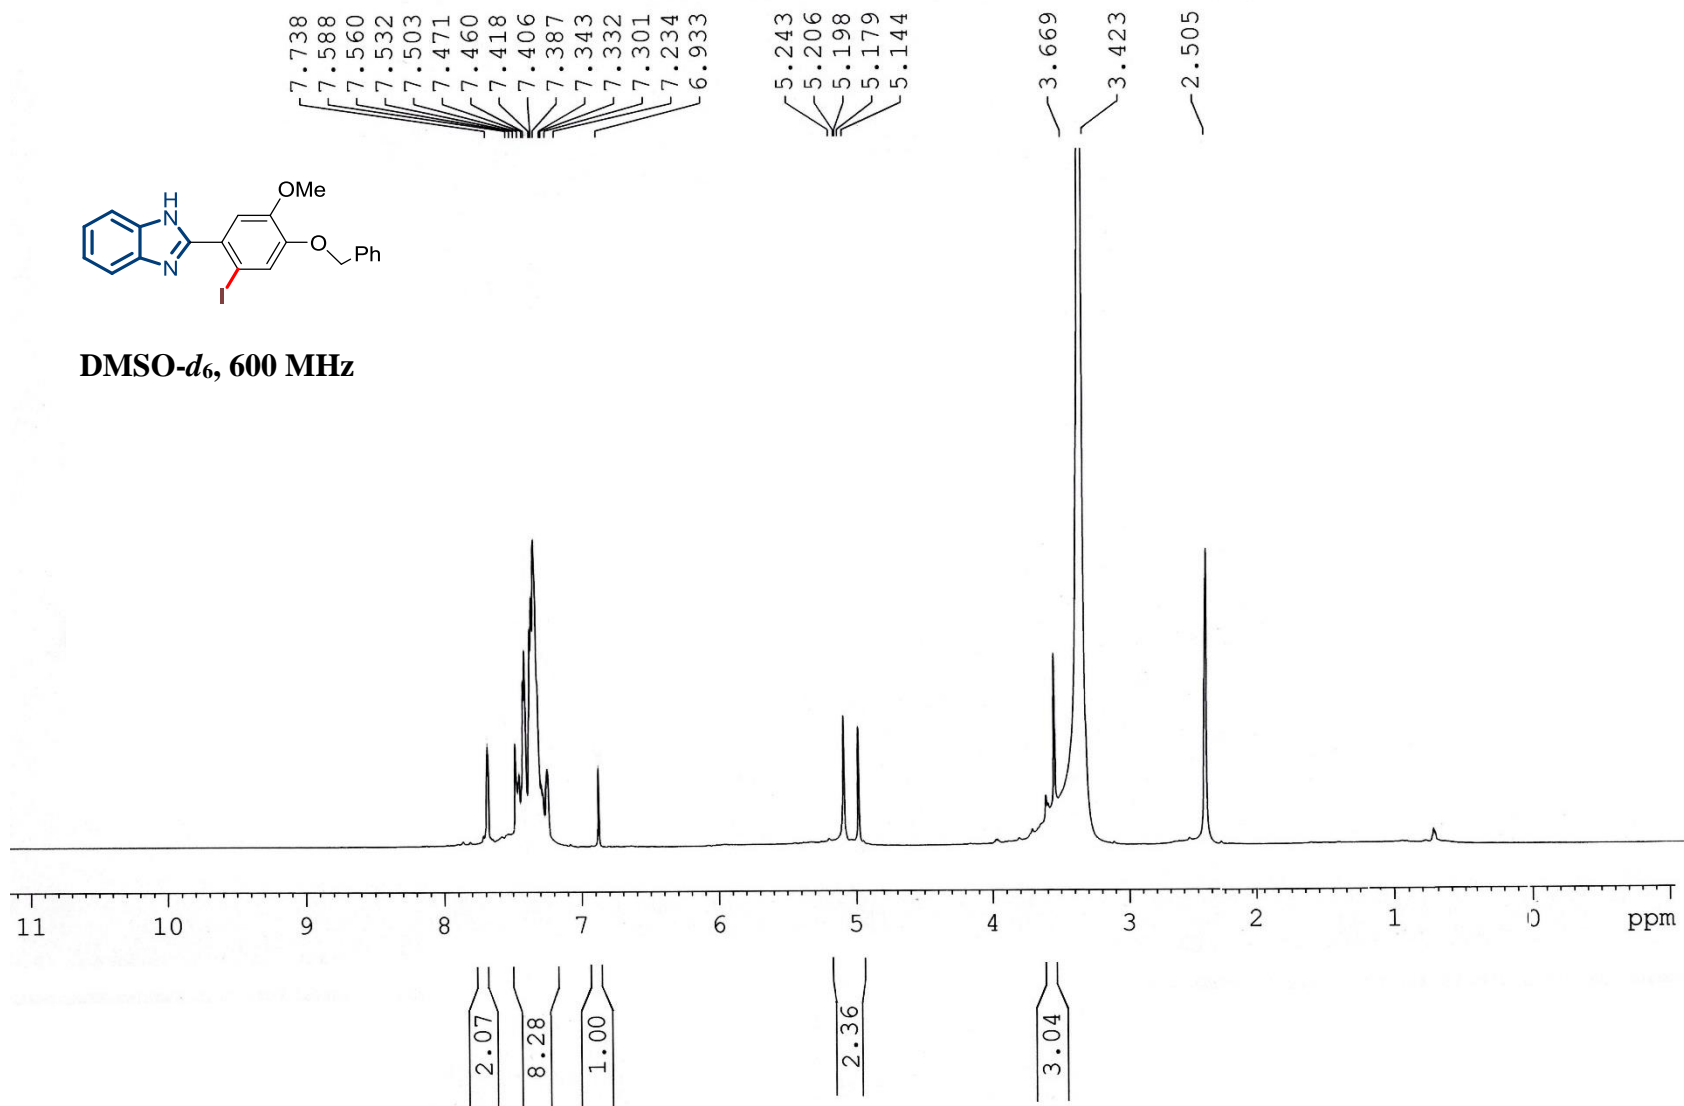

# <sup>13</sup>C NMR of Compound 4l

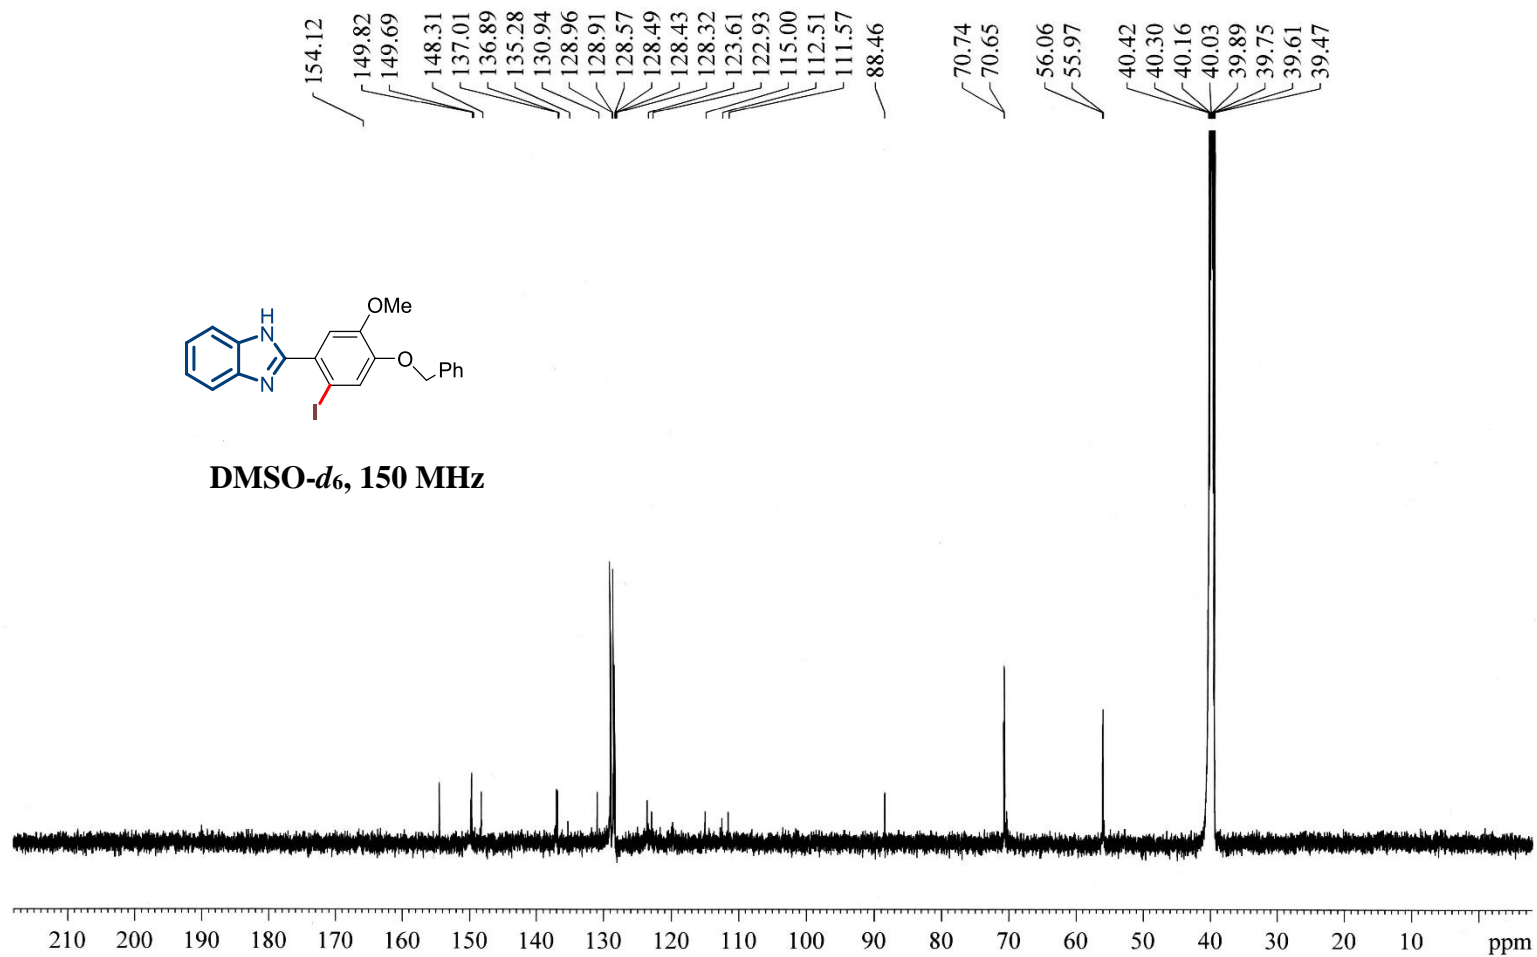

# $^1\text{H}$ NMR of Compound 4m

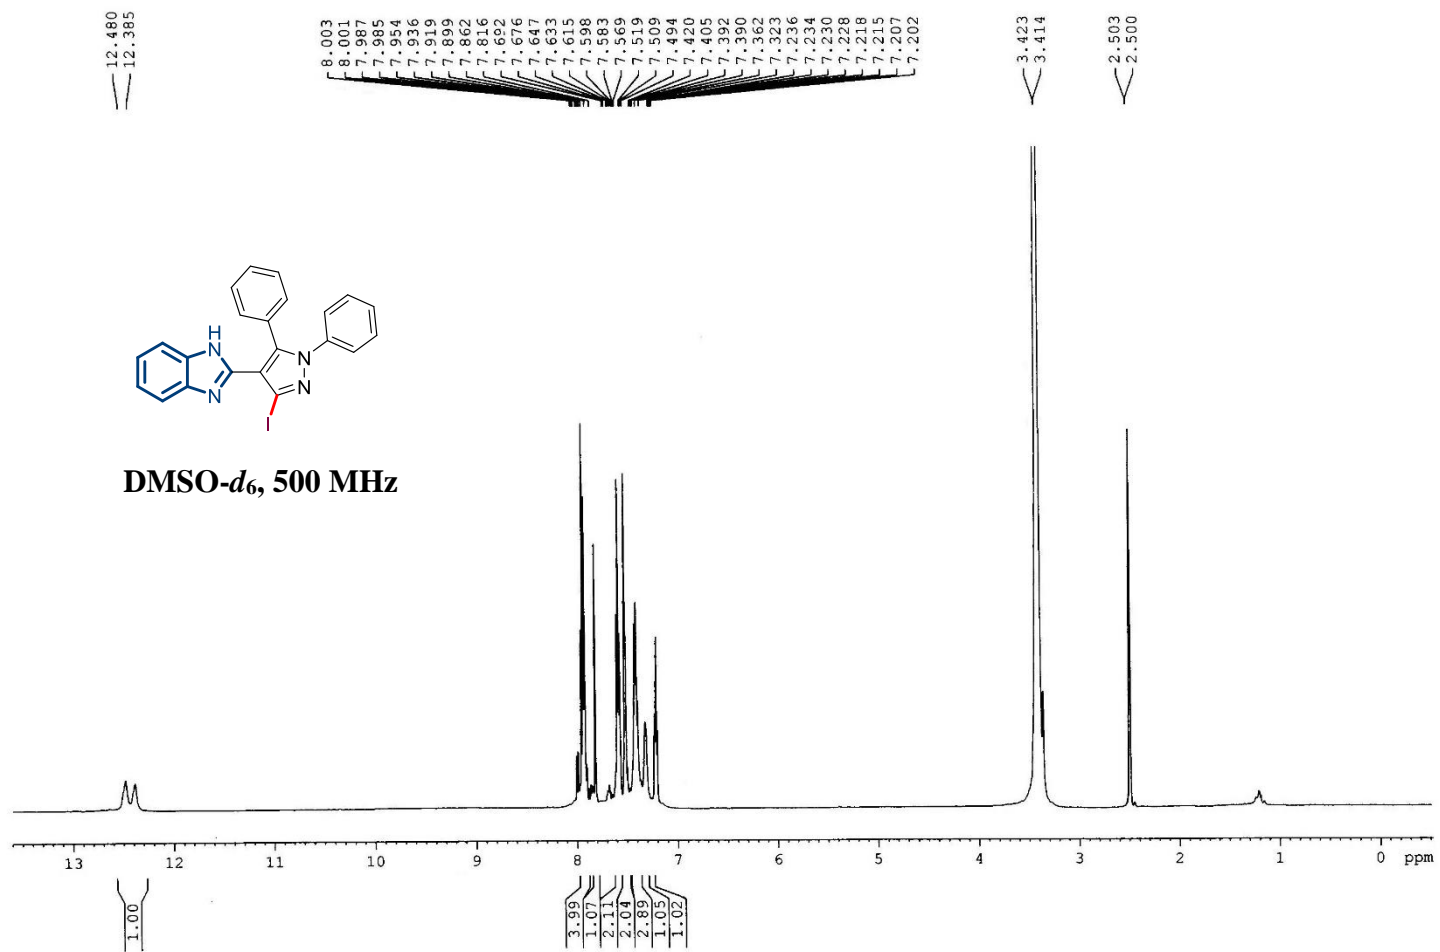



# <sup>13</sup>C NMR of Compound 4m

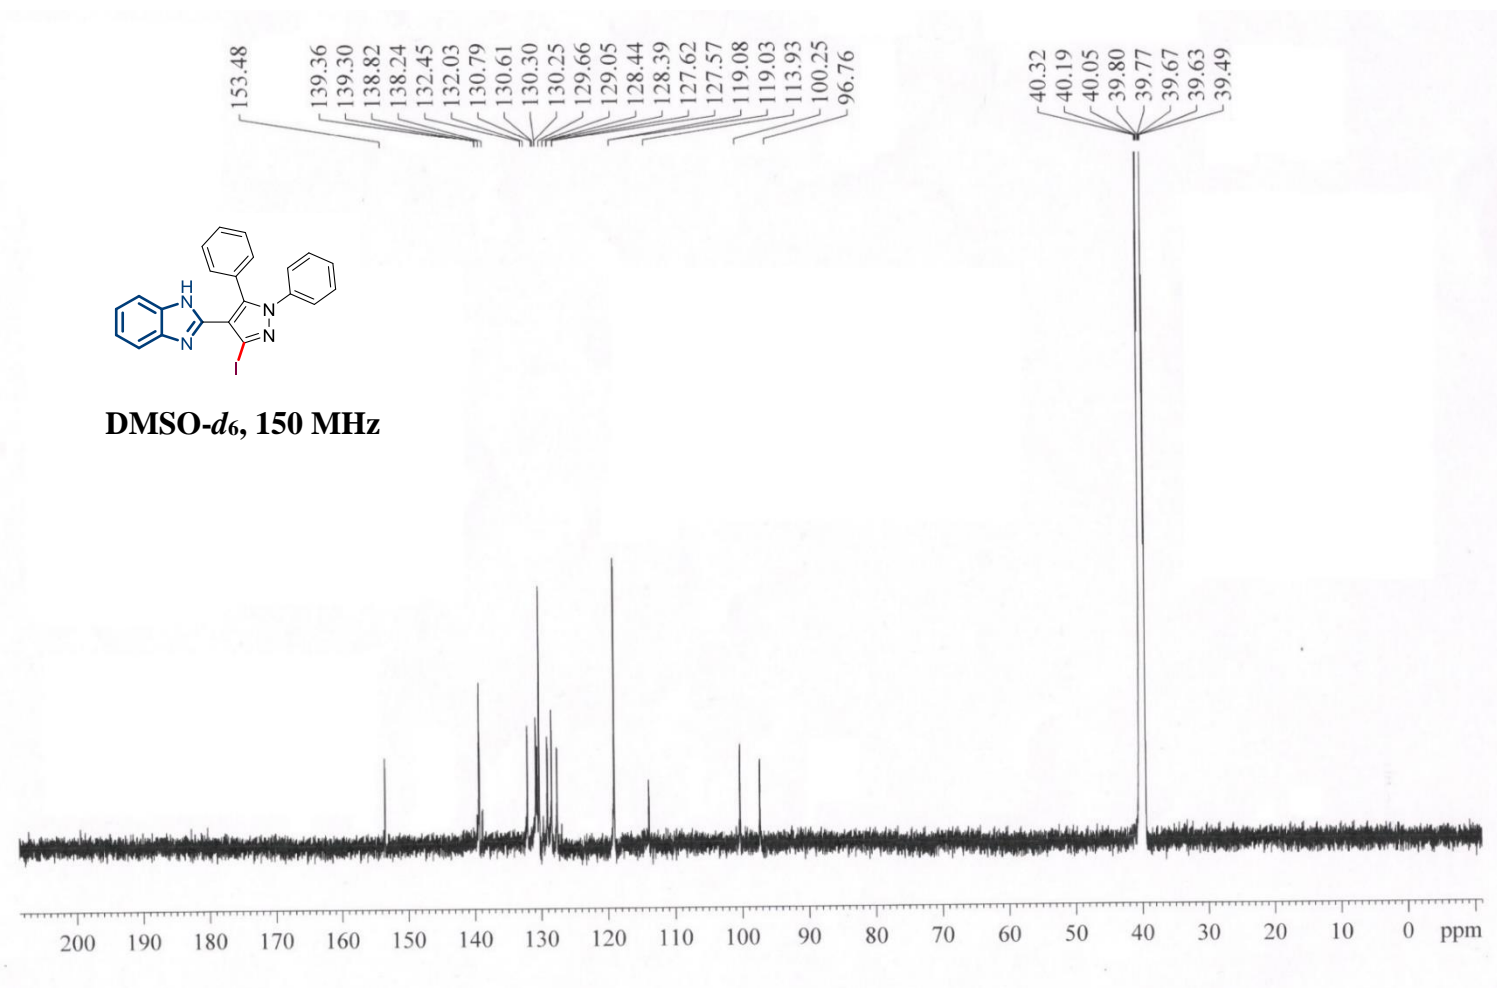

# <sup>1</sup>H NMR of Compound 4n

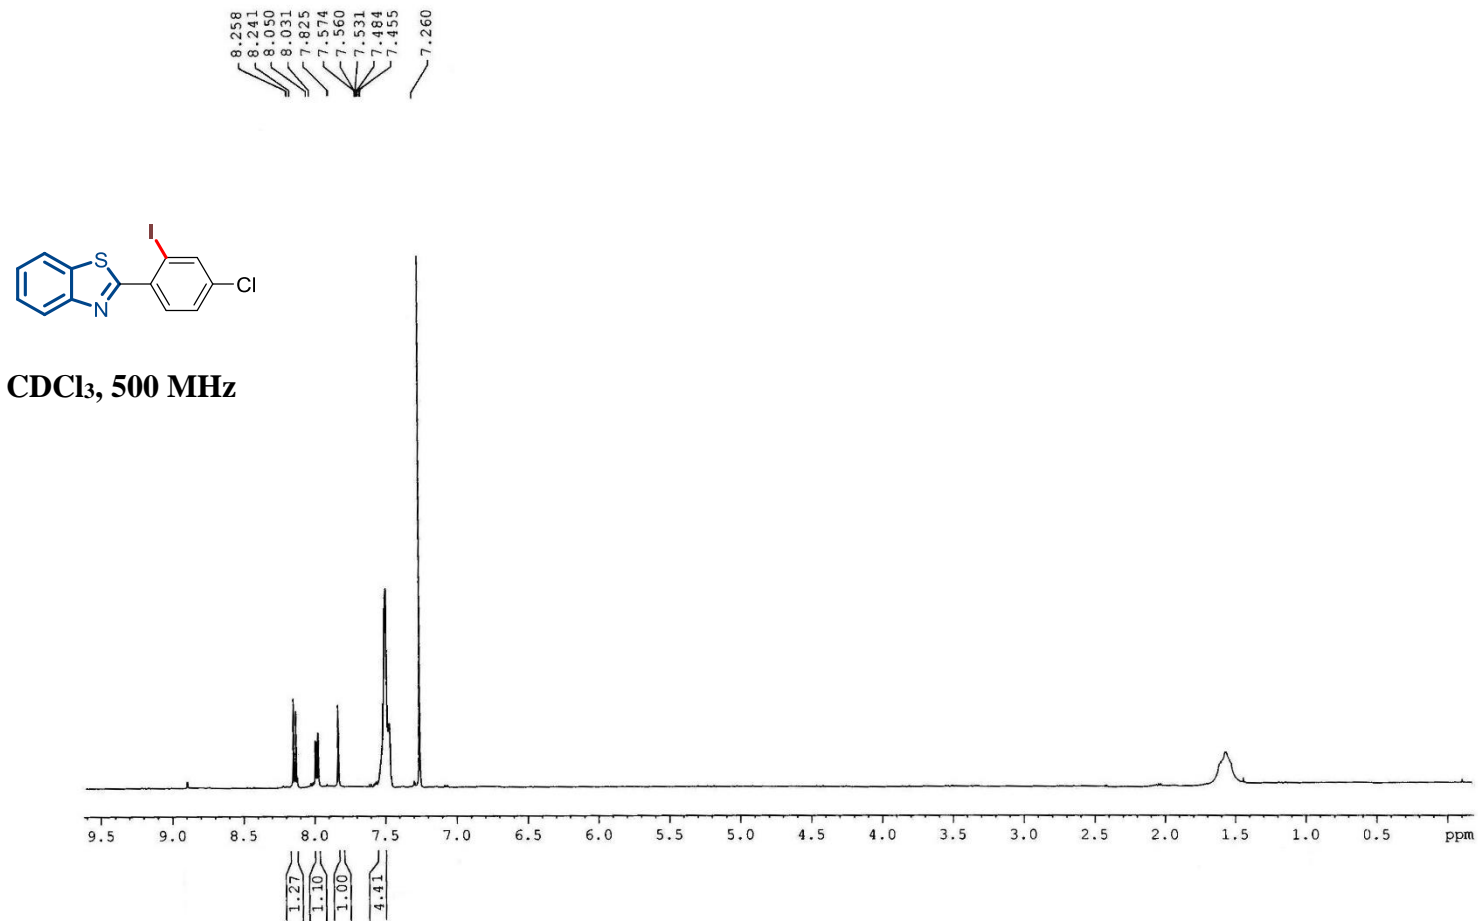

# <sup>13</sup>C NMR of Compound 4n

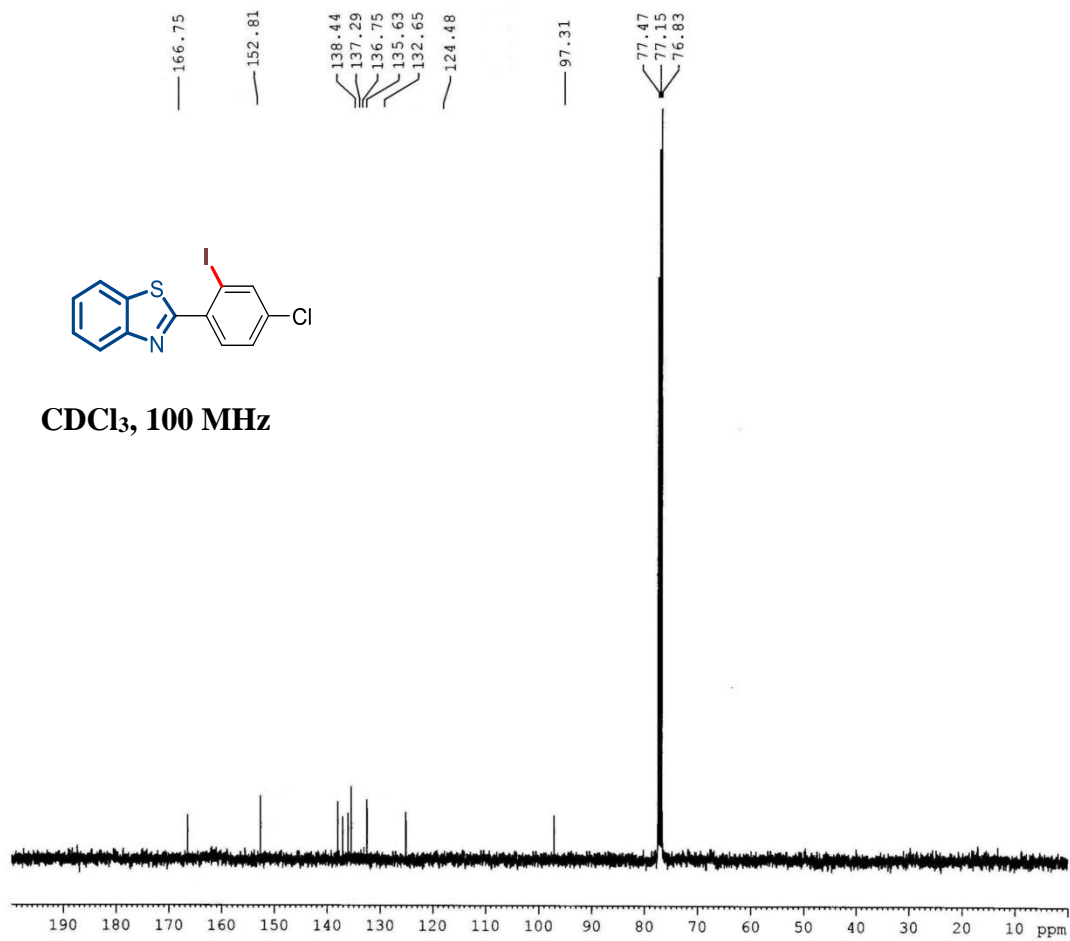

# <sup>1</sup>H NMR of Compound 4o

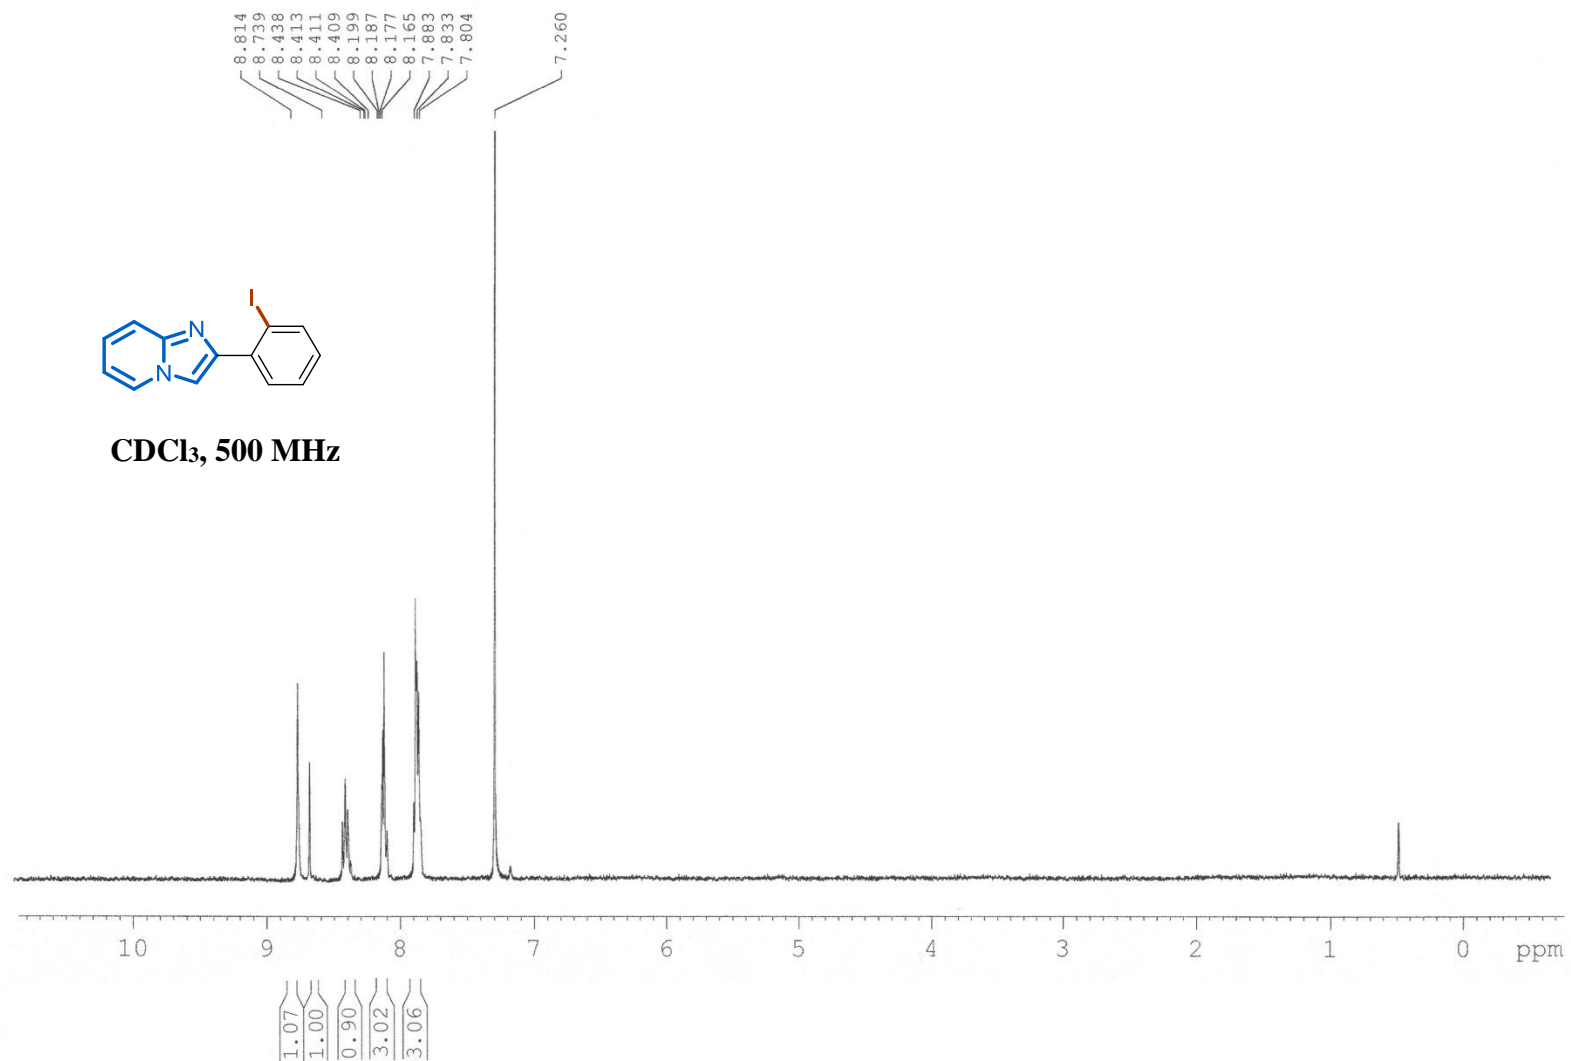

# <sup>3</sup>C NMR of Compound 4o

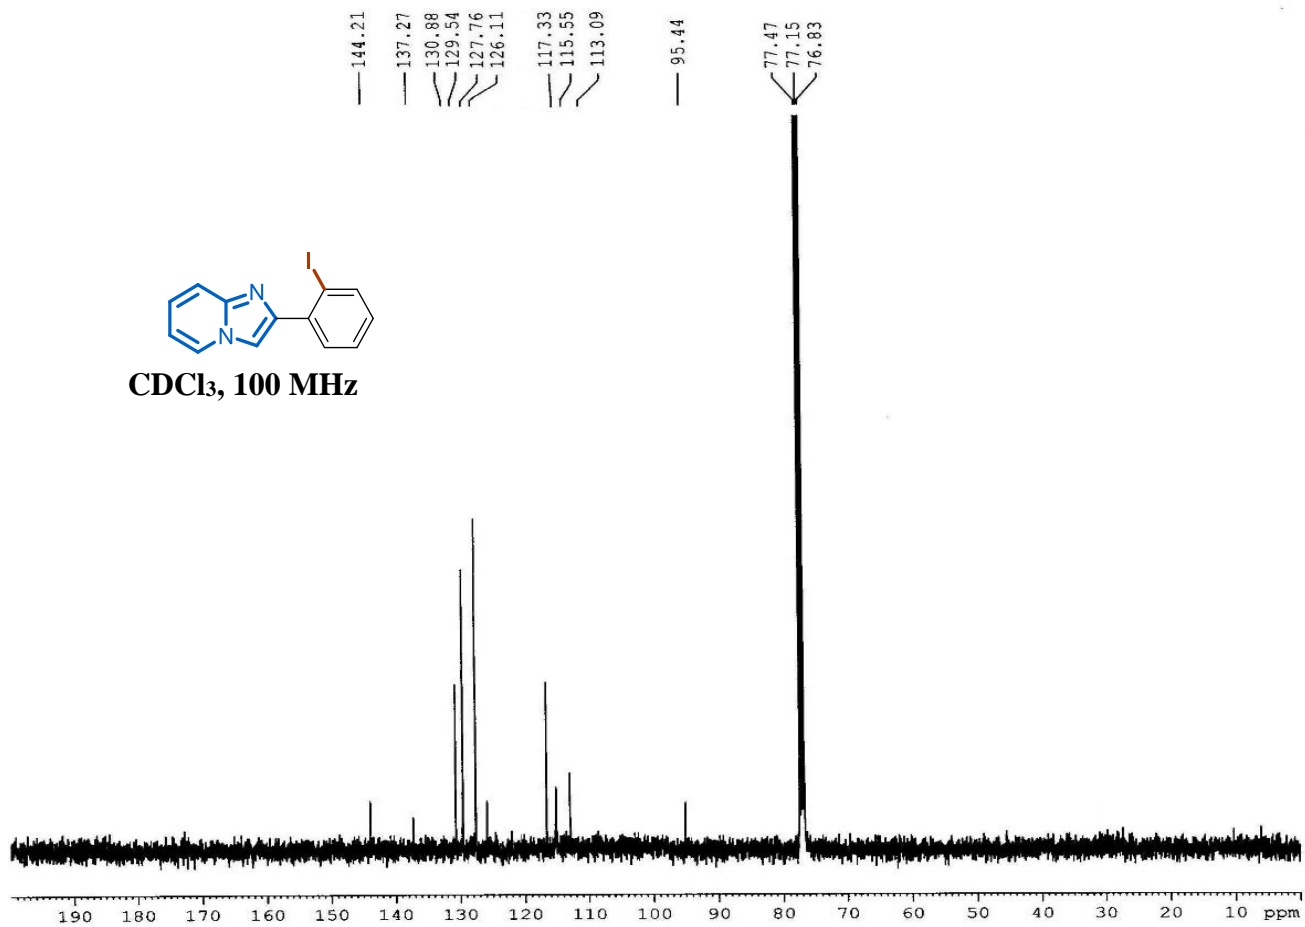

# <sup>1</sup>H NMR of Compound 4p

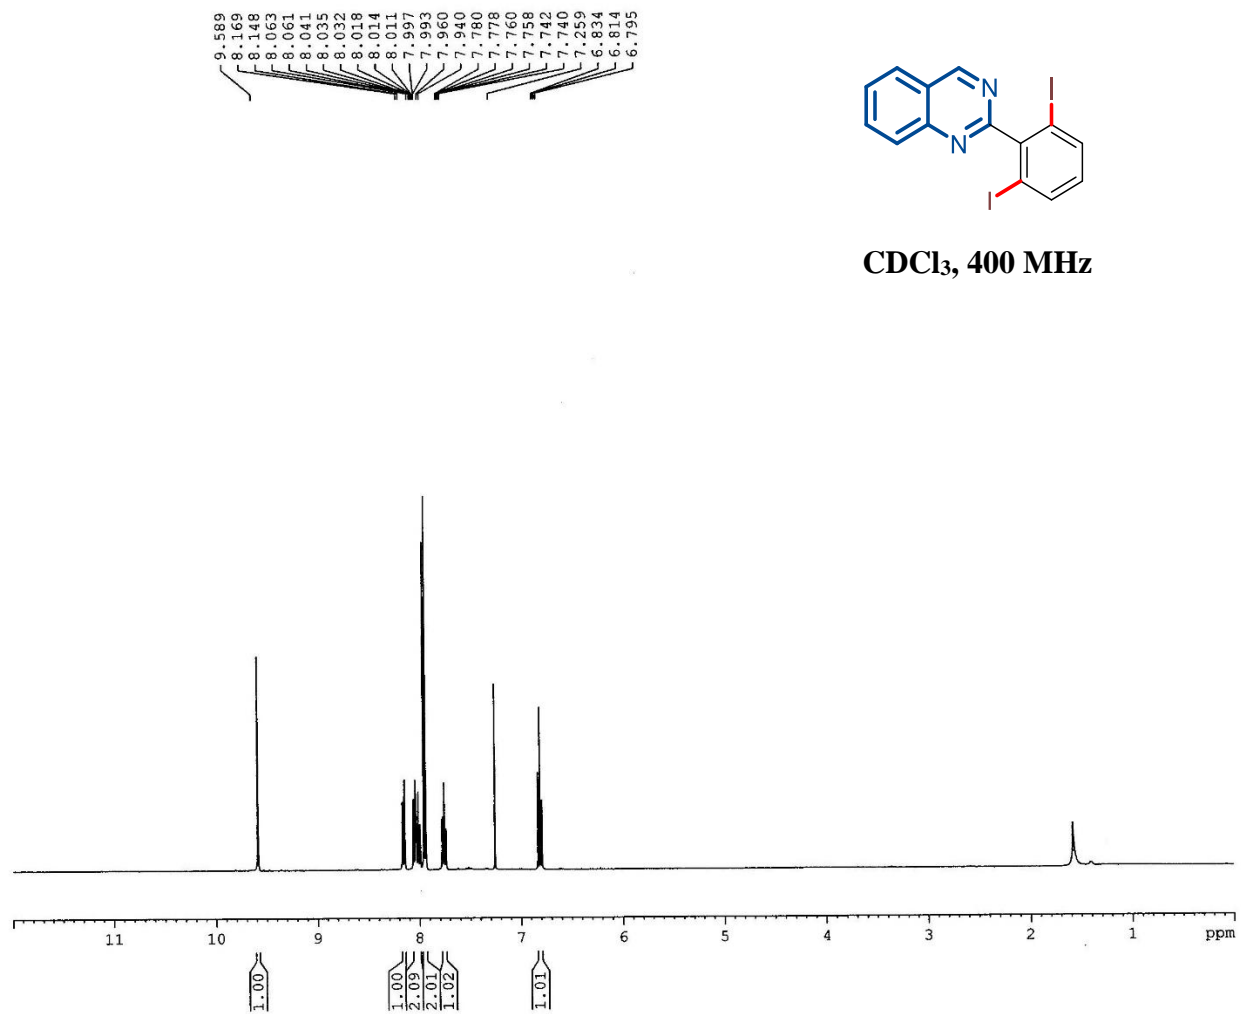

# <sup>13</sup>C NMR of Compound 4p

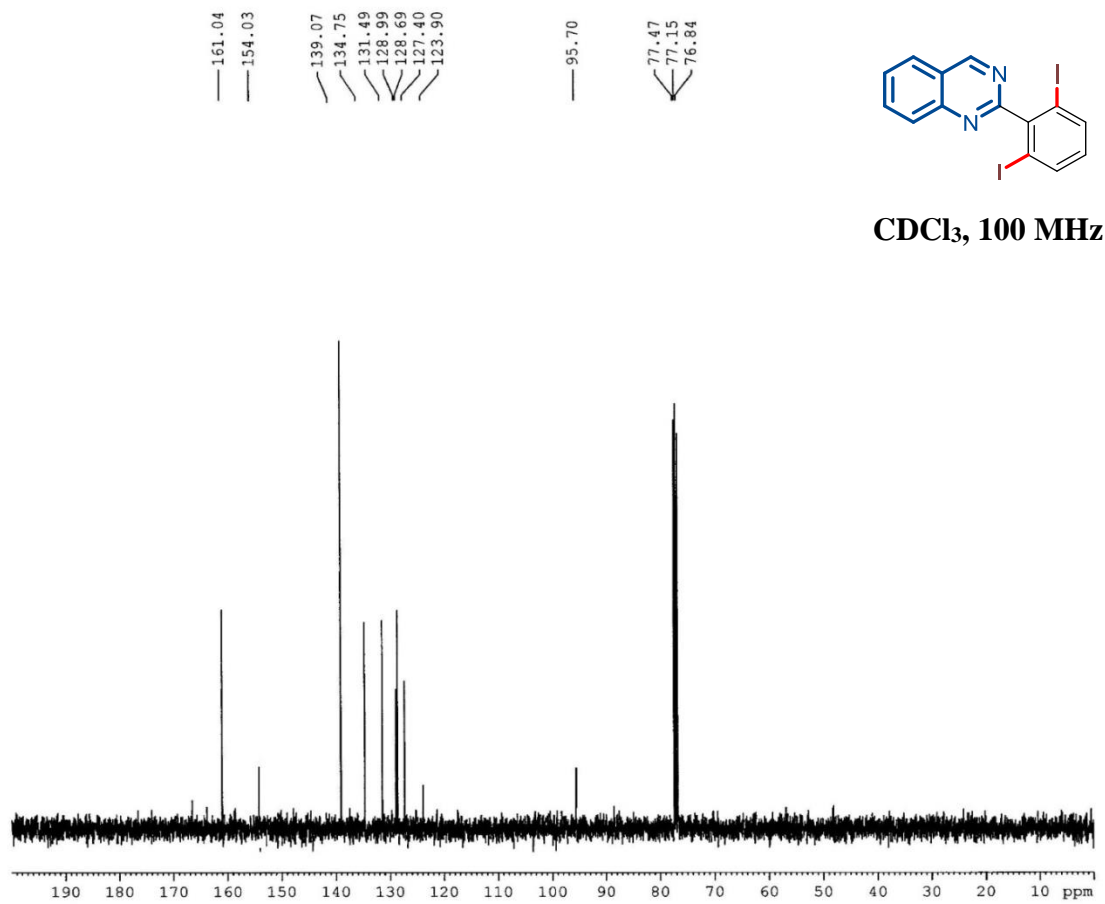

# <sup>1</sup>H NMR of Compound 4q

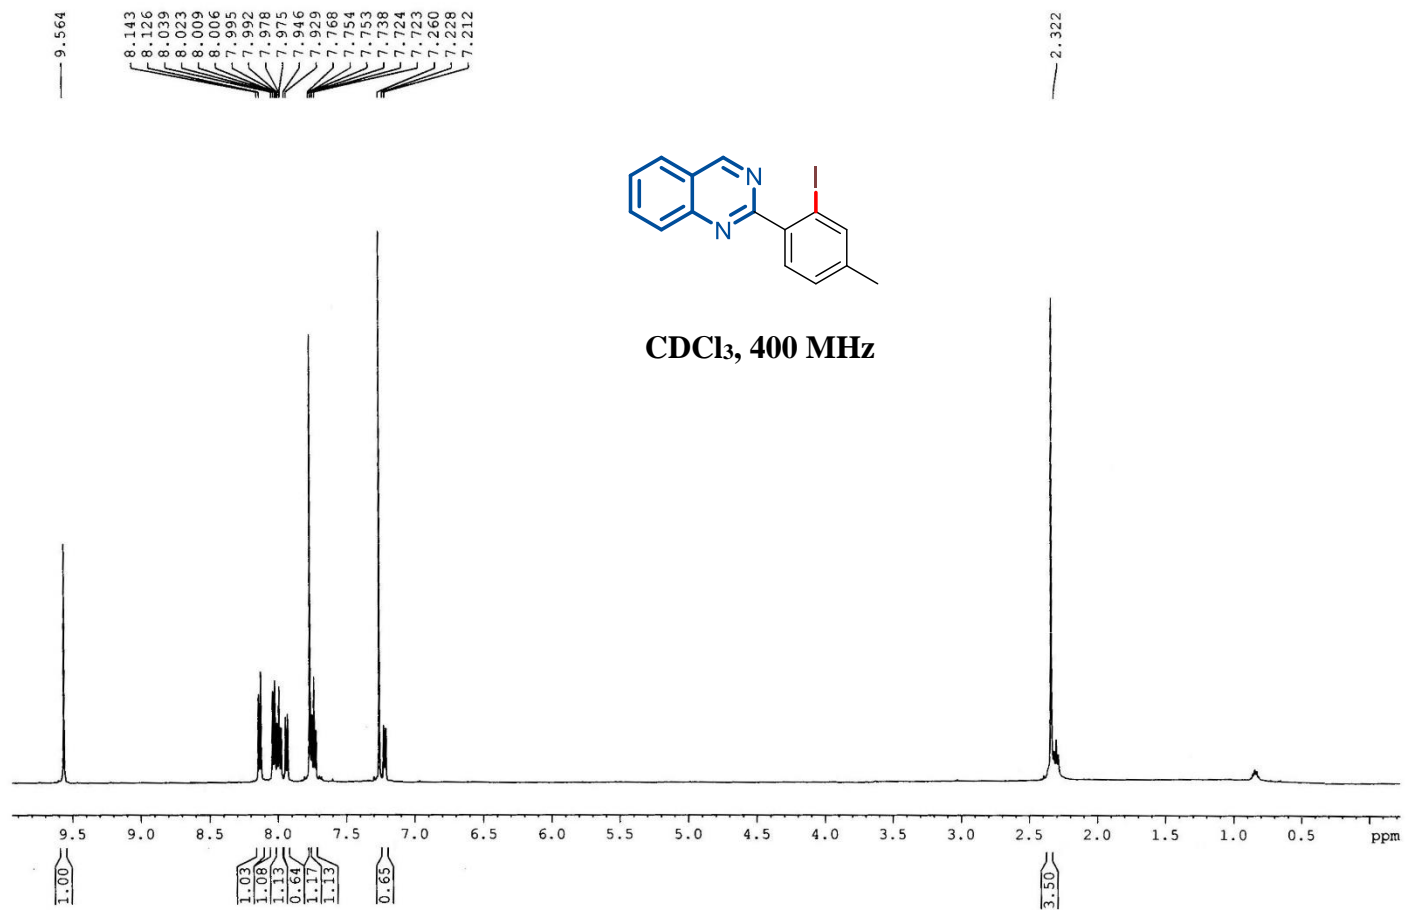



# <sup>13</sup>C NMR of Compound 4q

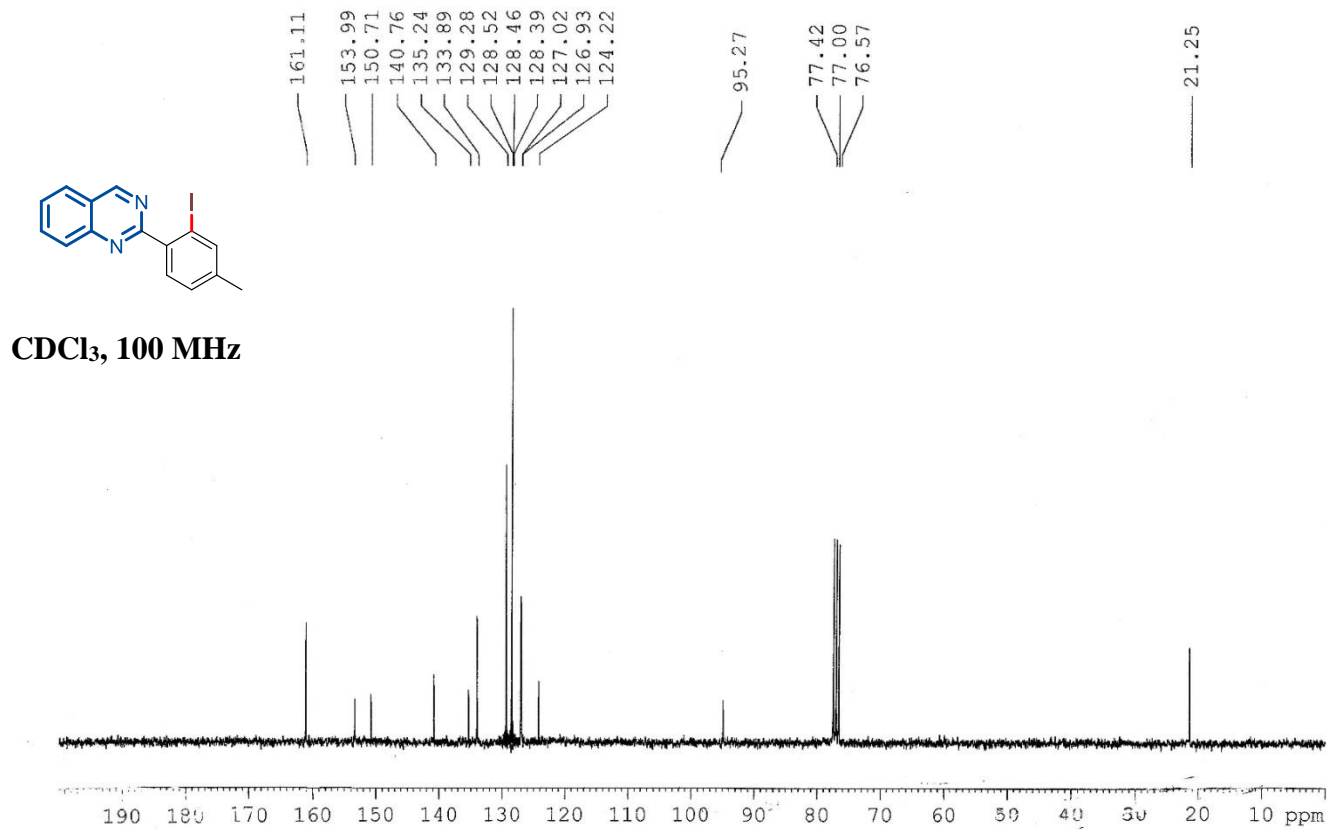

# <sup>1</sup>H NMR of Compound 4r

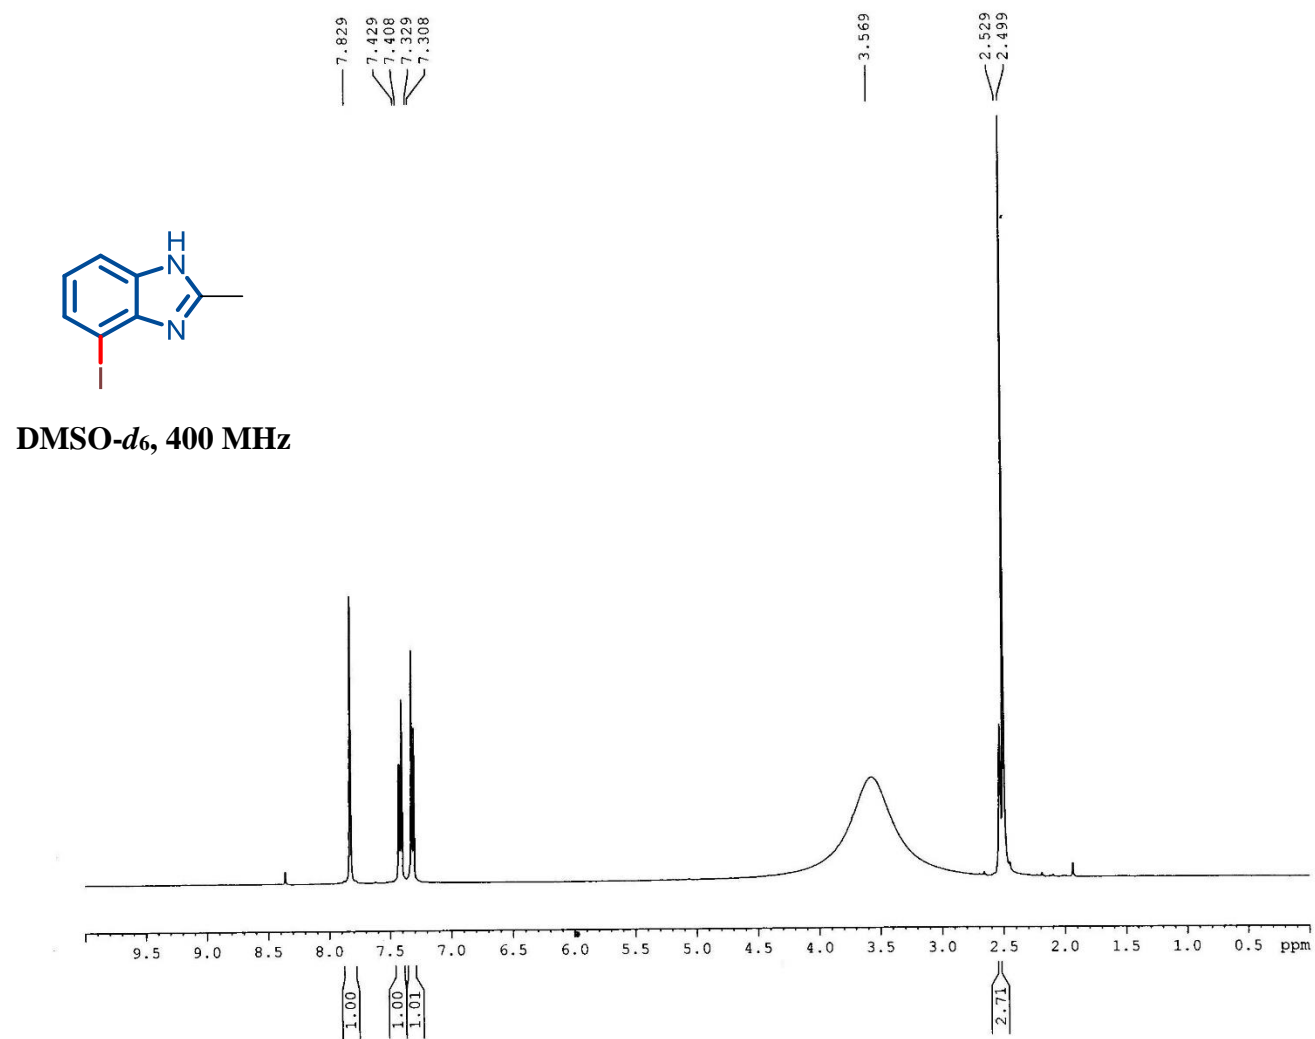

# $^{13}\text{C}$ NMR of Compound 4r

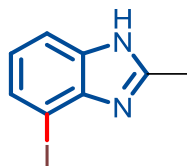

DMSO-*d*<sub>6</sub>, 100 MHz

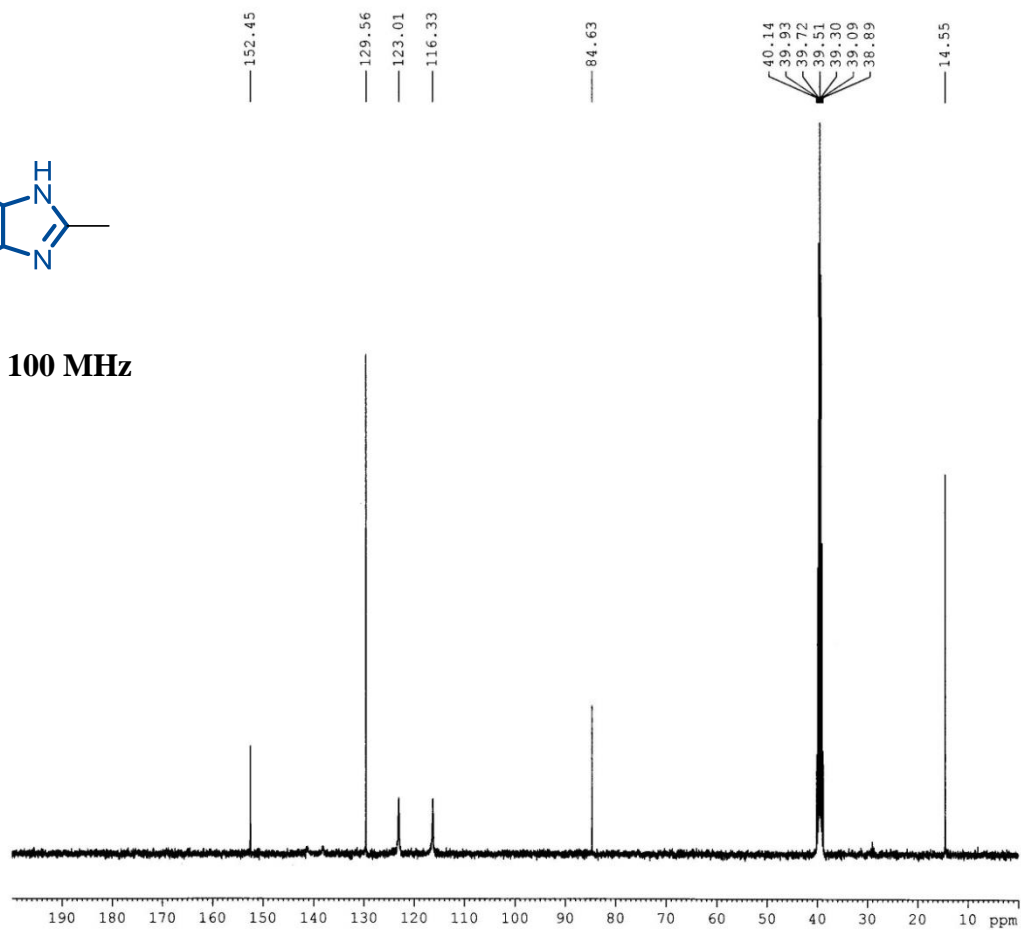

# <sup>1</sup>H NMR of Compound 5a

8.489  
8.485  
8.166  
8.160  
8.149  
8.142  
8.064  
8.058  
8.043  
8.039  
7.536  
7.511  
7.363  
7.359  
7.353  
7.347  
7.233

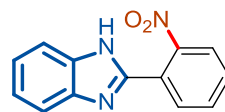

CDCl<sub>3</sub>, 400 MHz

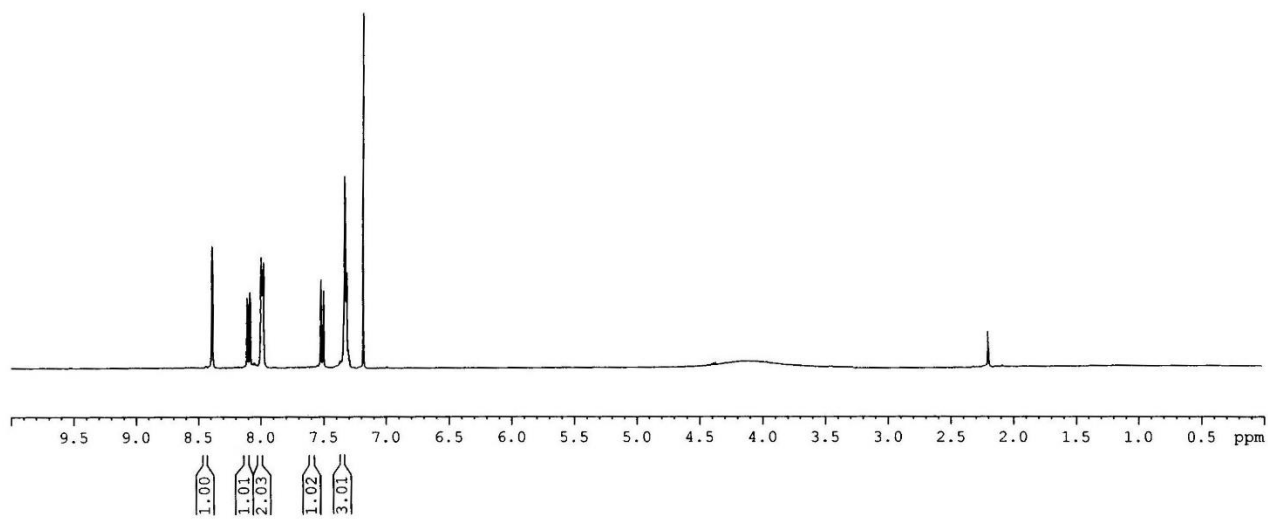

# <sup>13</sup>C NMR of Compound 5a

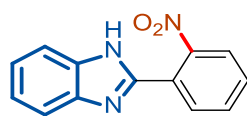

CDCl<sub>3</sub>, 100 MHz

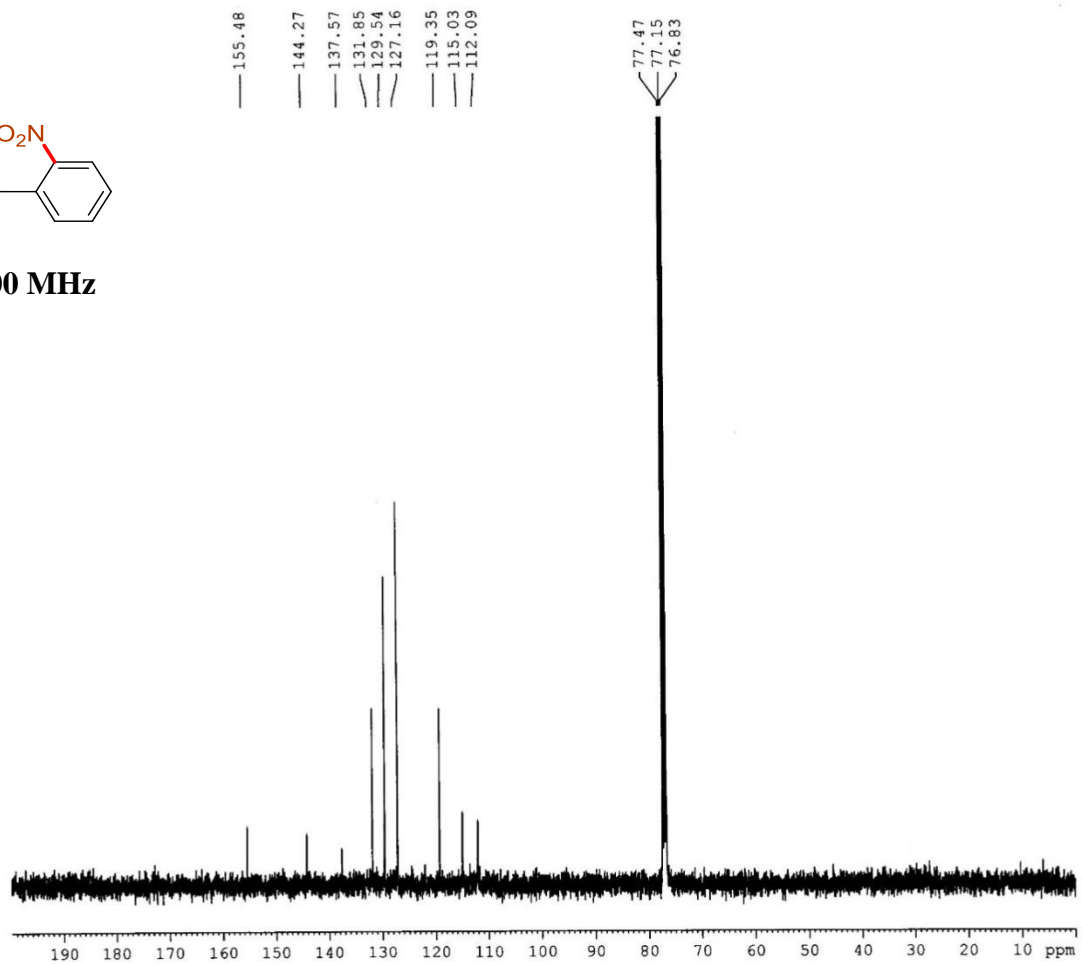

# $^1\text{H}$ NMR of Compound 5b

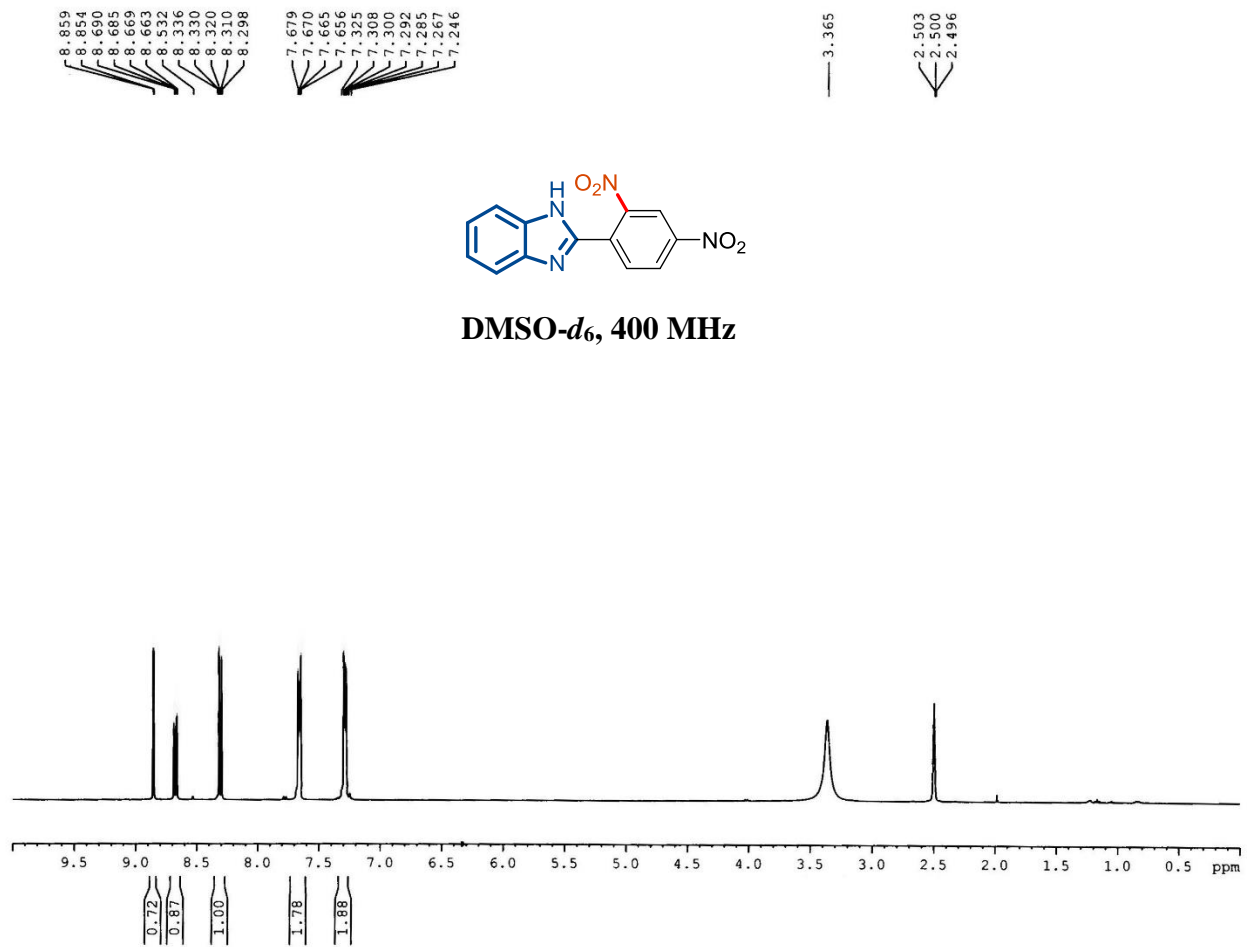

# <sup>13</sup>C NMR of Compound 5b

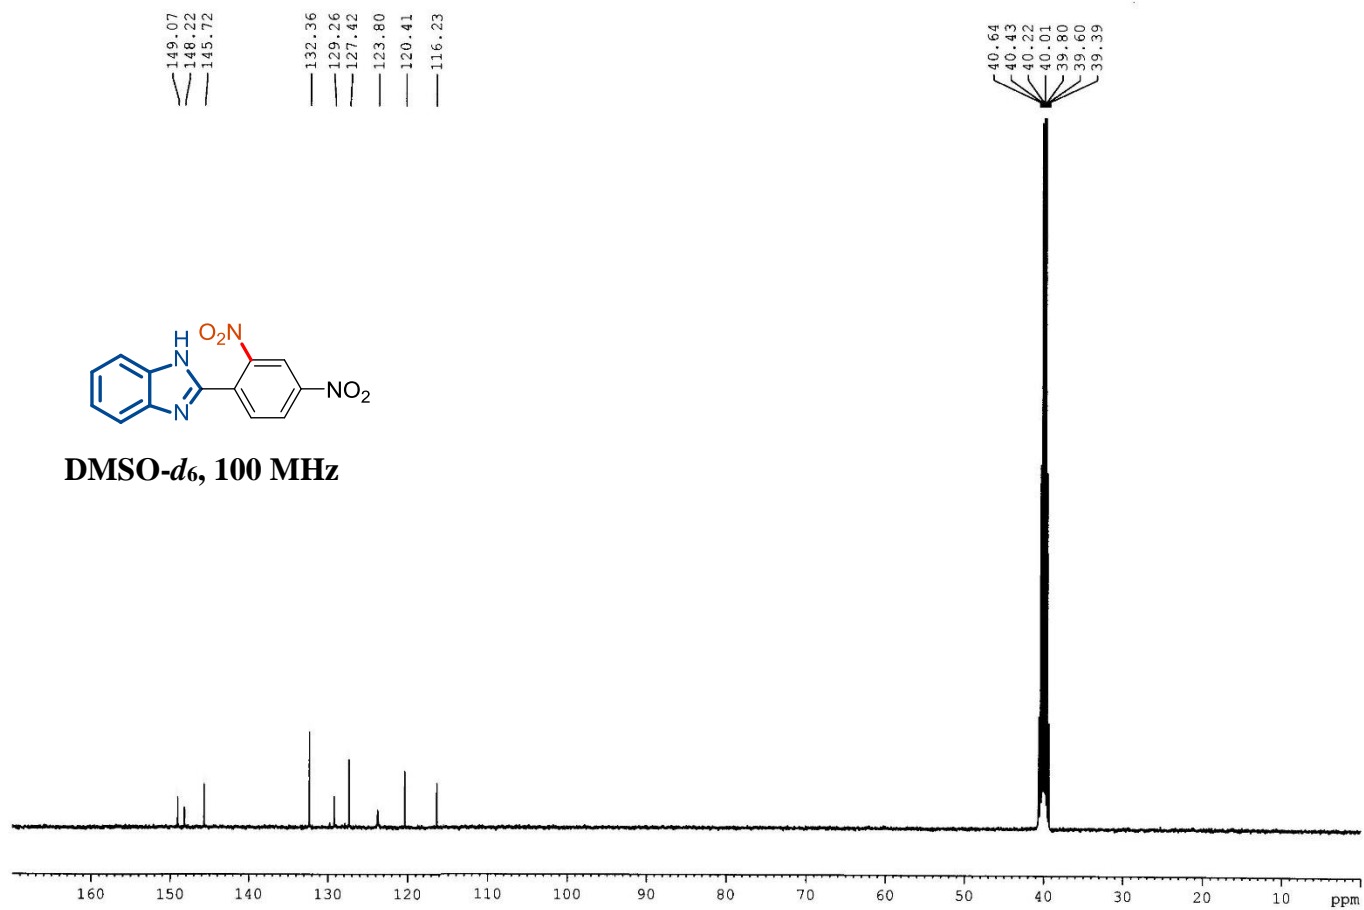

# $^1\text{H}$ NMR of Compound 5c

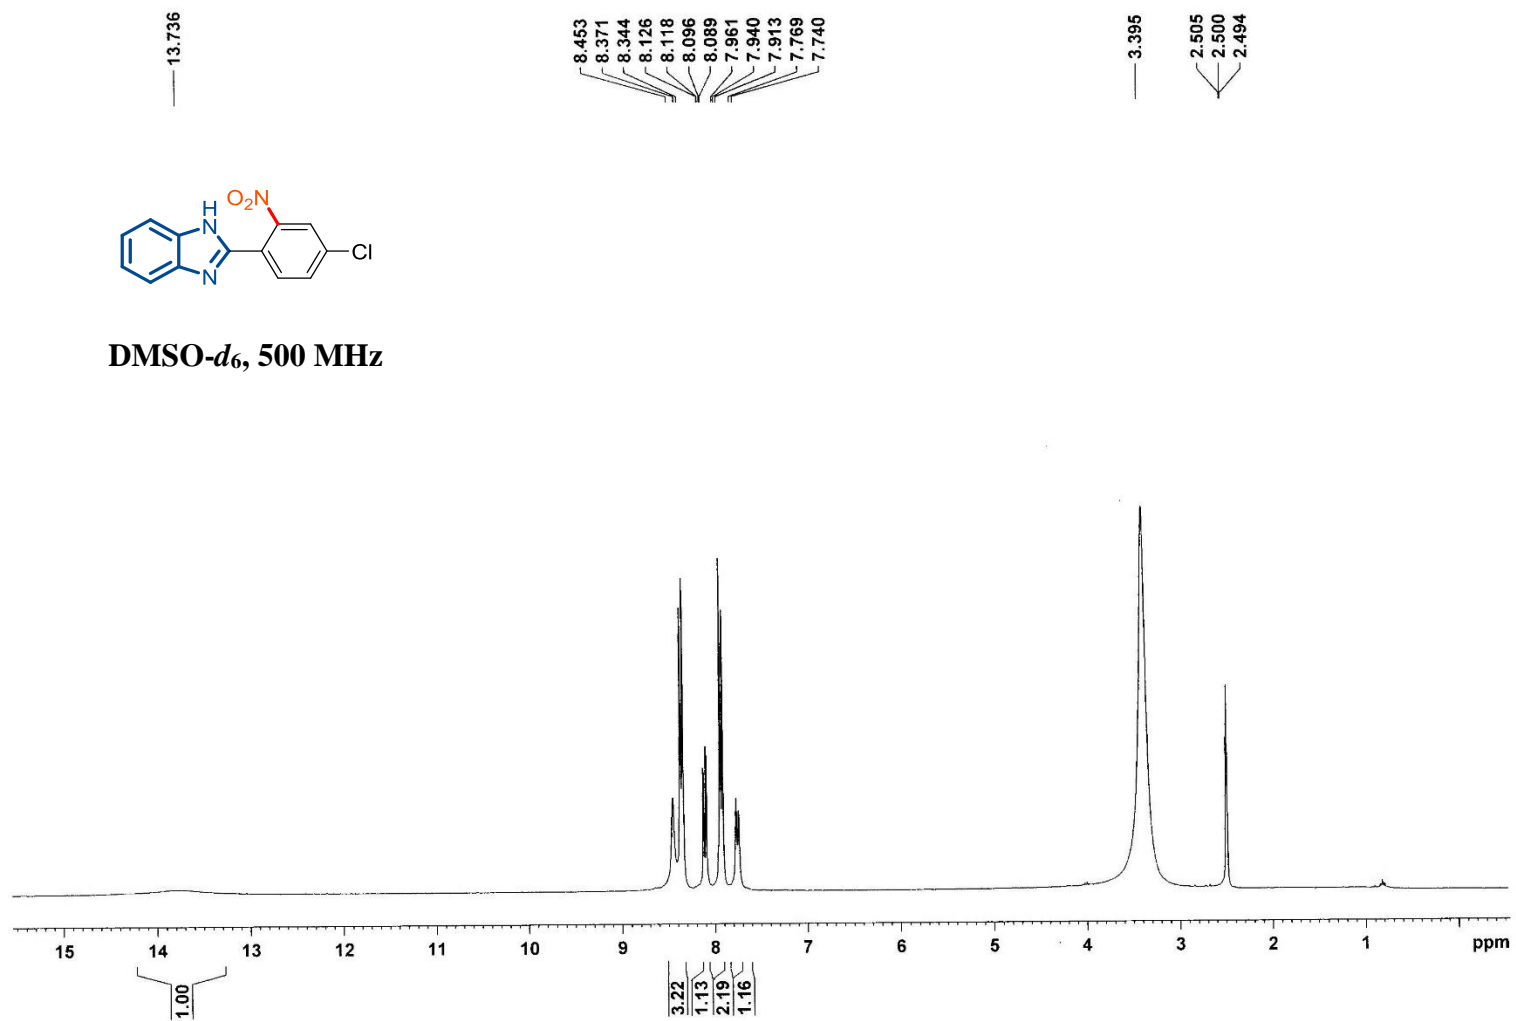



# $^{13}\text{C}$ NMR of Compound 5c

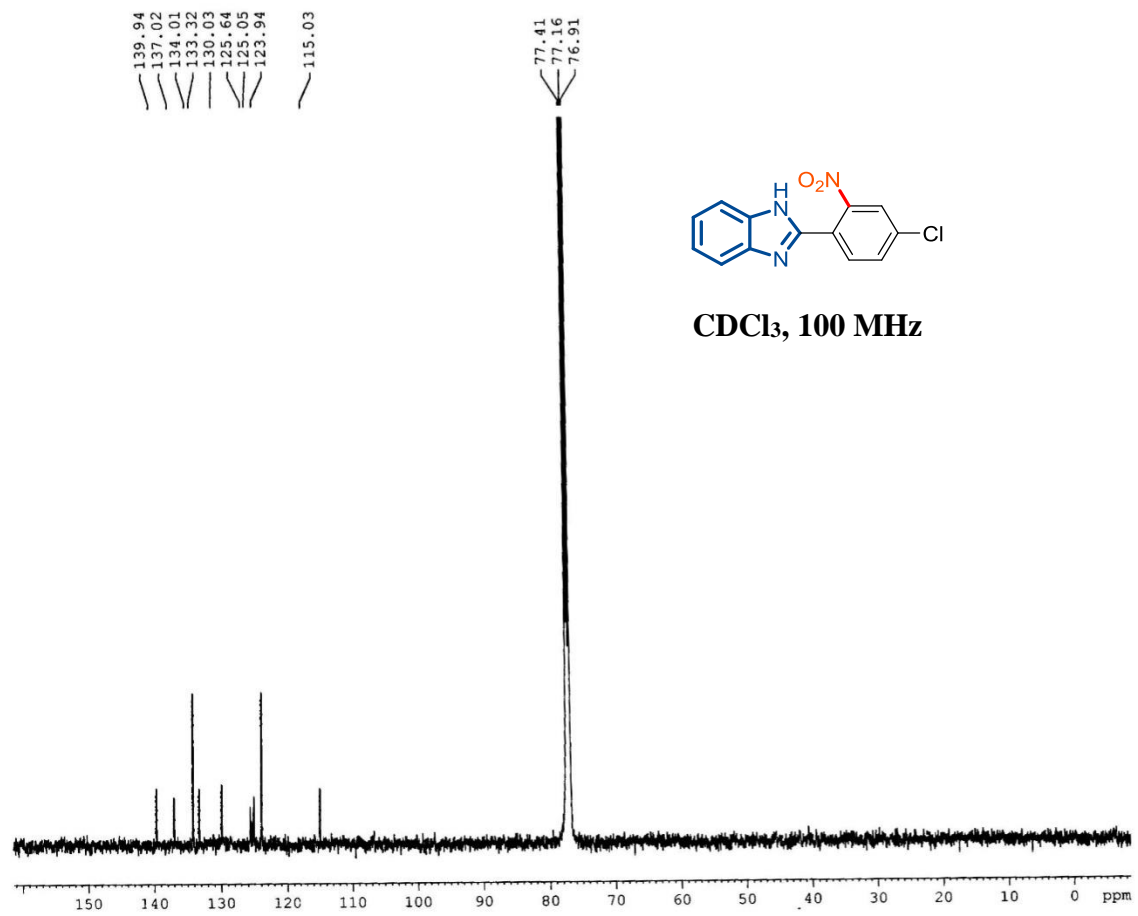

# $^1\text{H}$ NMR of compound 5d

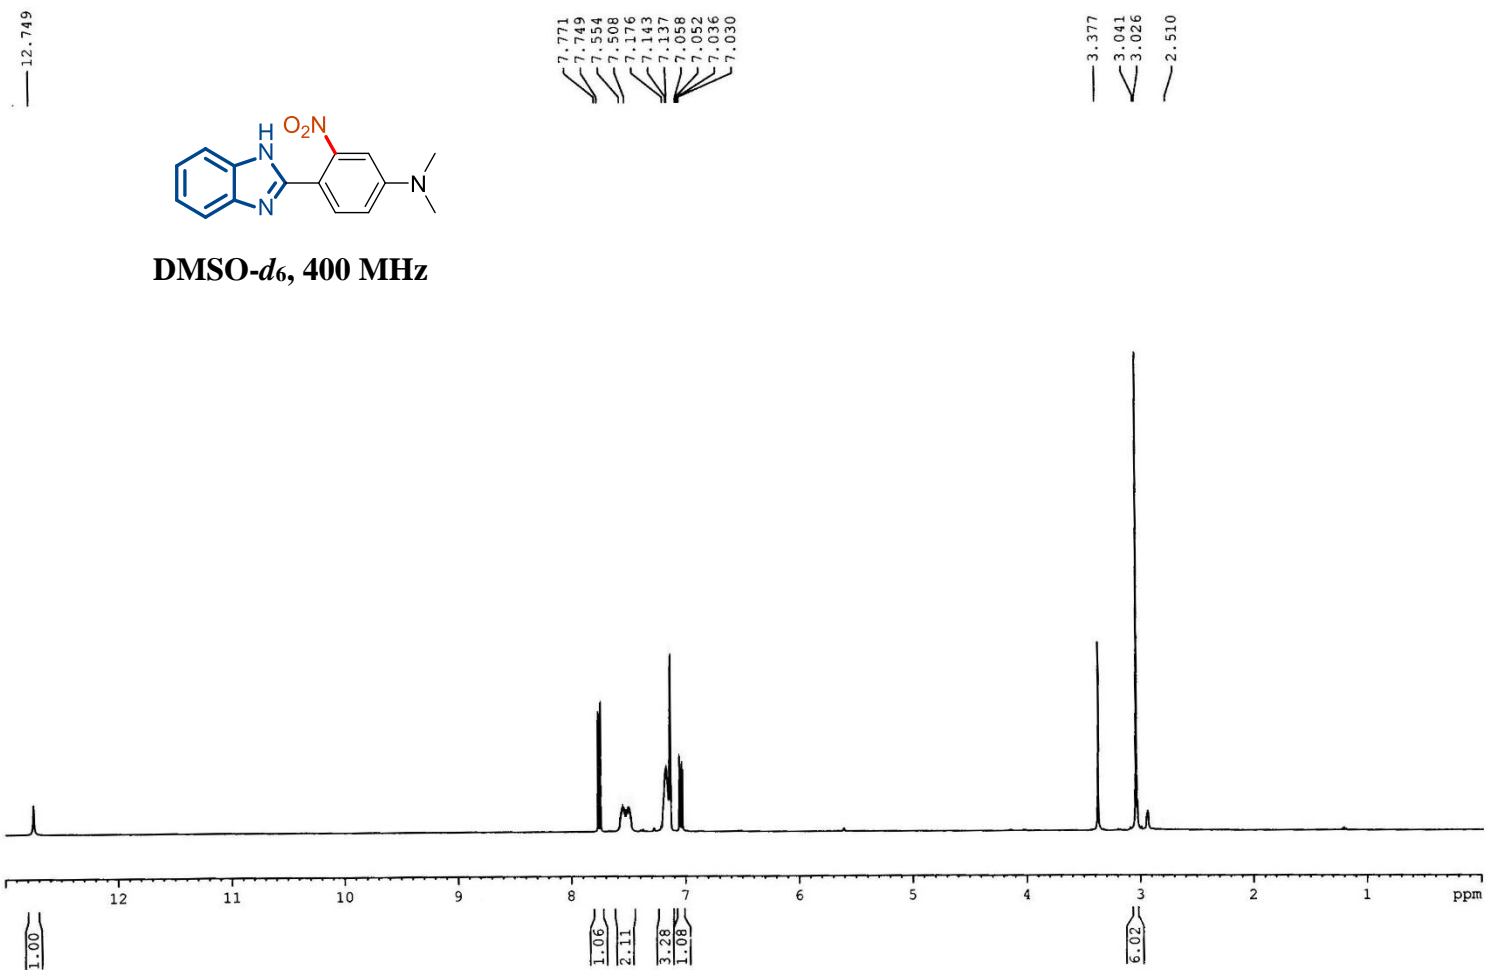

# $^{13}\text{C}$ NMR of compound 5d

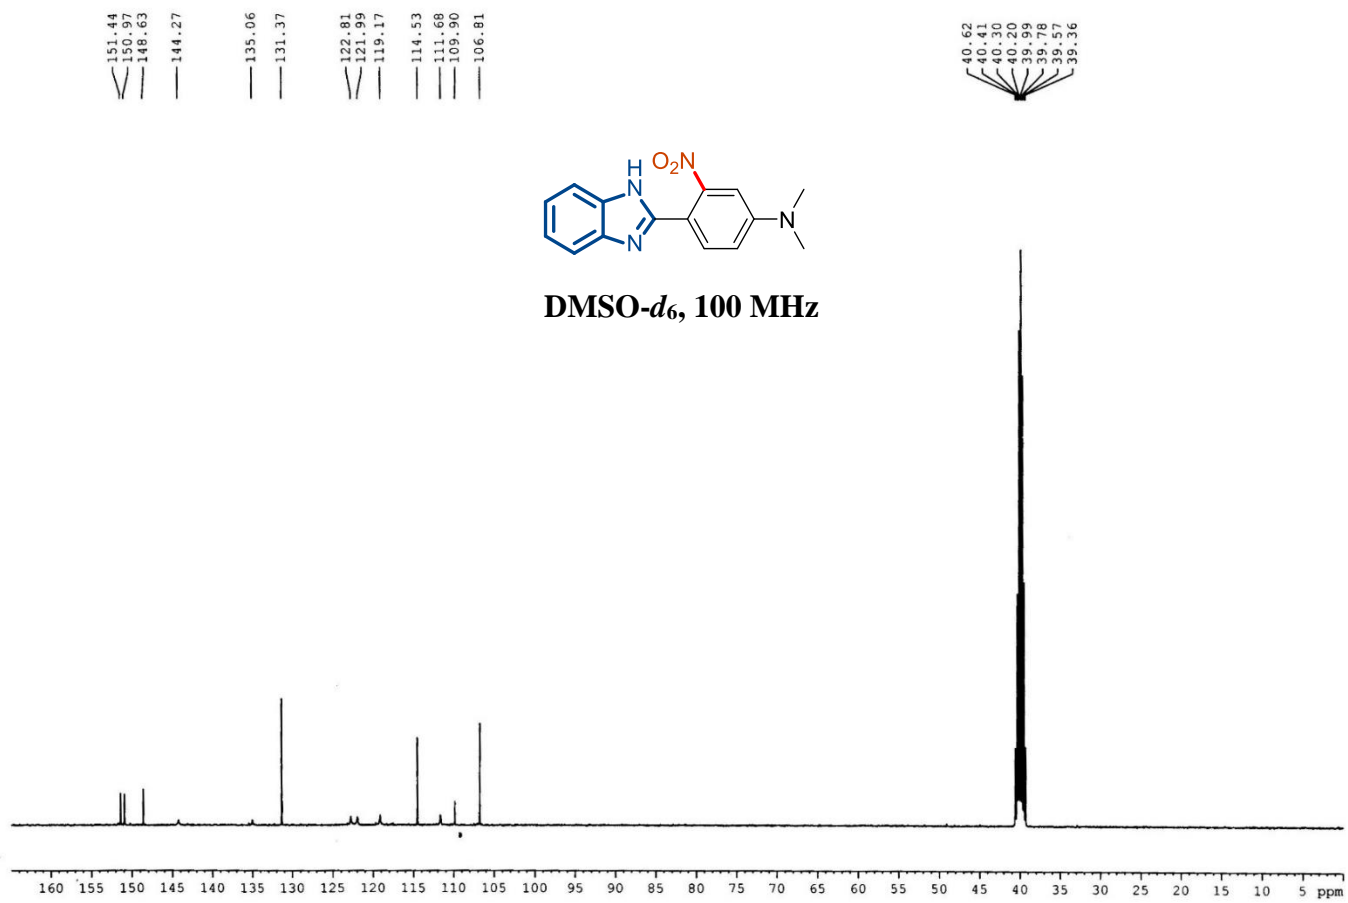

# <sup>1</sup>H NMR of compound 5e

8.521  
8.515  
8.220  
8.213  
8.190  
8.183  
7.745  
7.742  
7.732  
7.729  
7.662  
7.633  
7.574  
7.571  
7.557  
7.554  
7.259  
7.206  
7.194  
7.190  
7.177

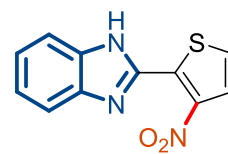

CDCl<sub>3</sub>, 300 MHz

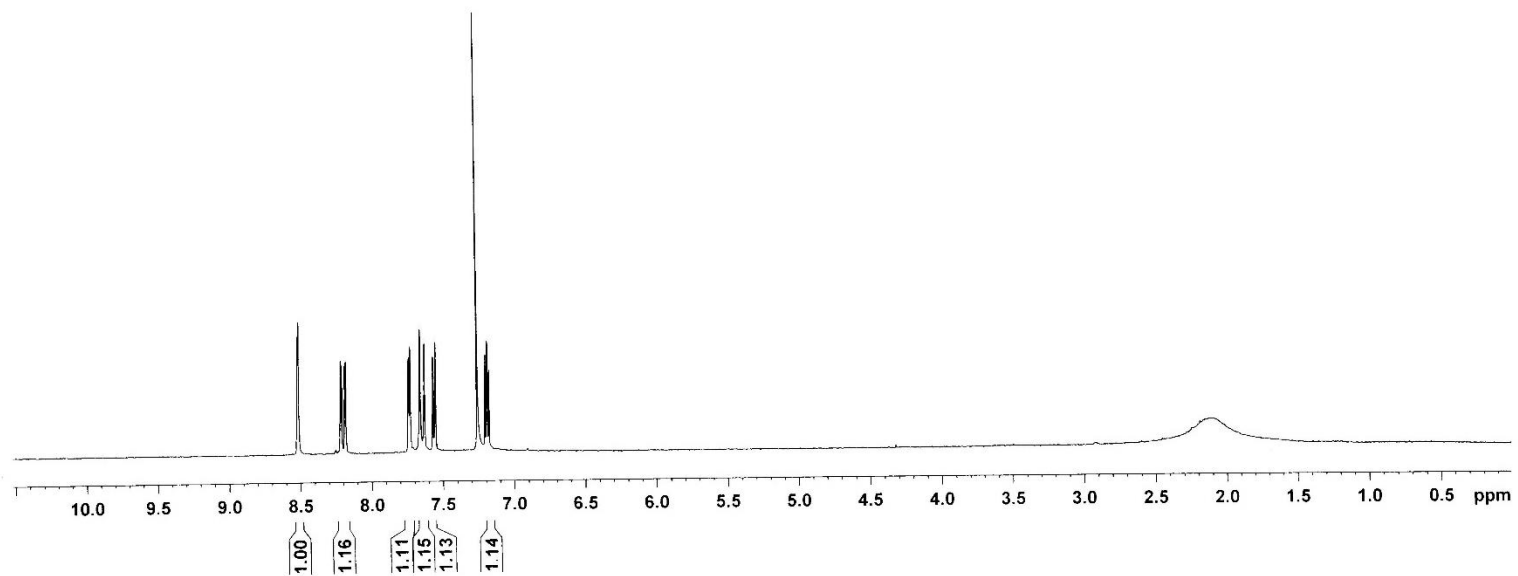

# <sup>13</sup>C NMR of compound 5e

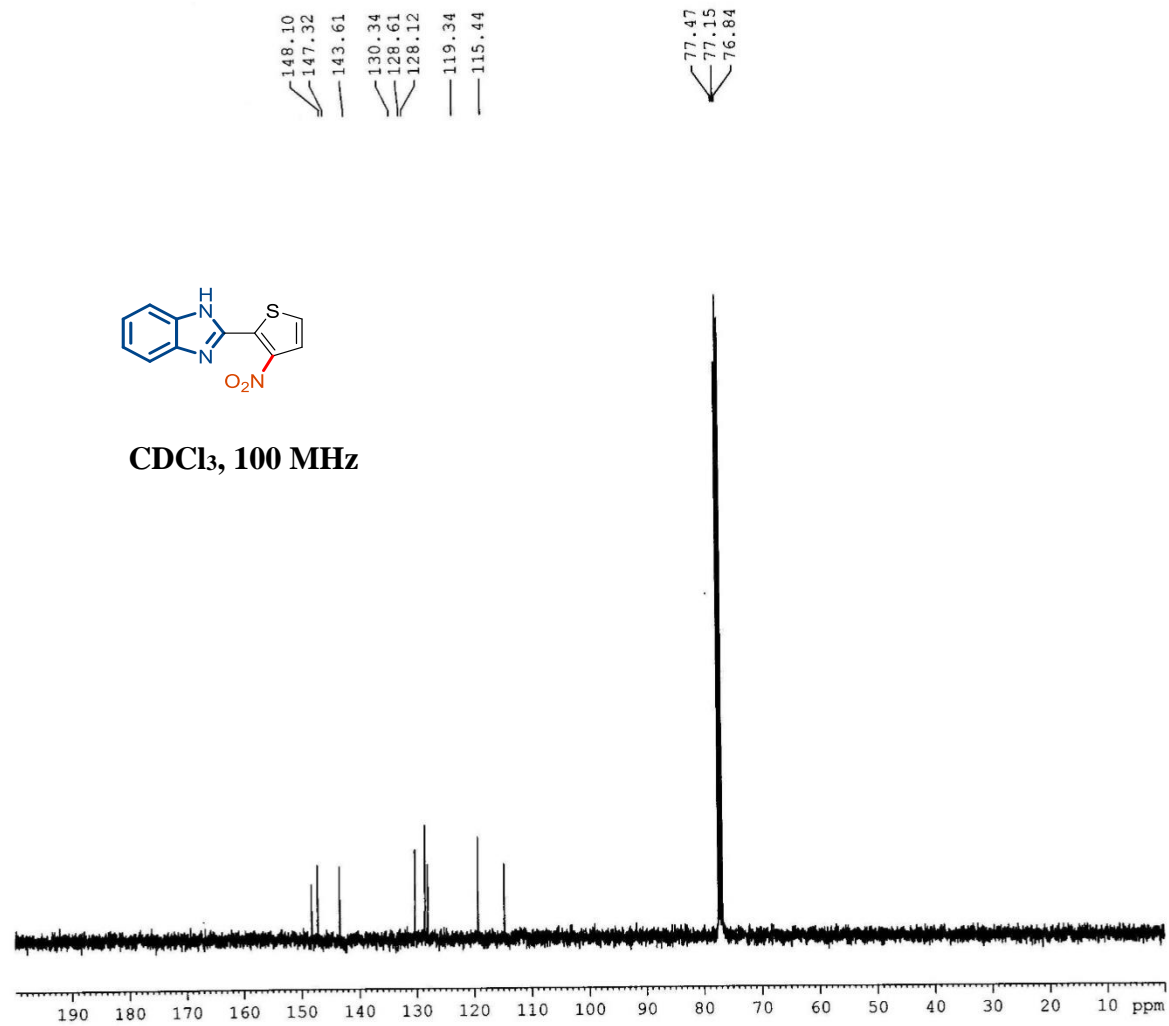

# <sup>1</sup>H NMR of compound 5f

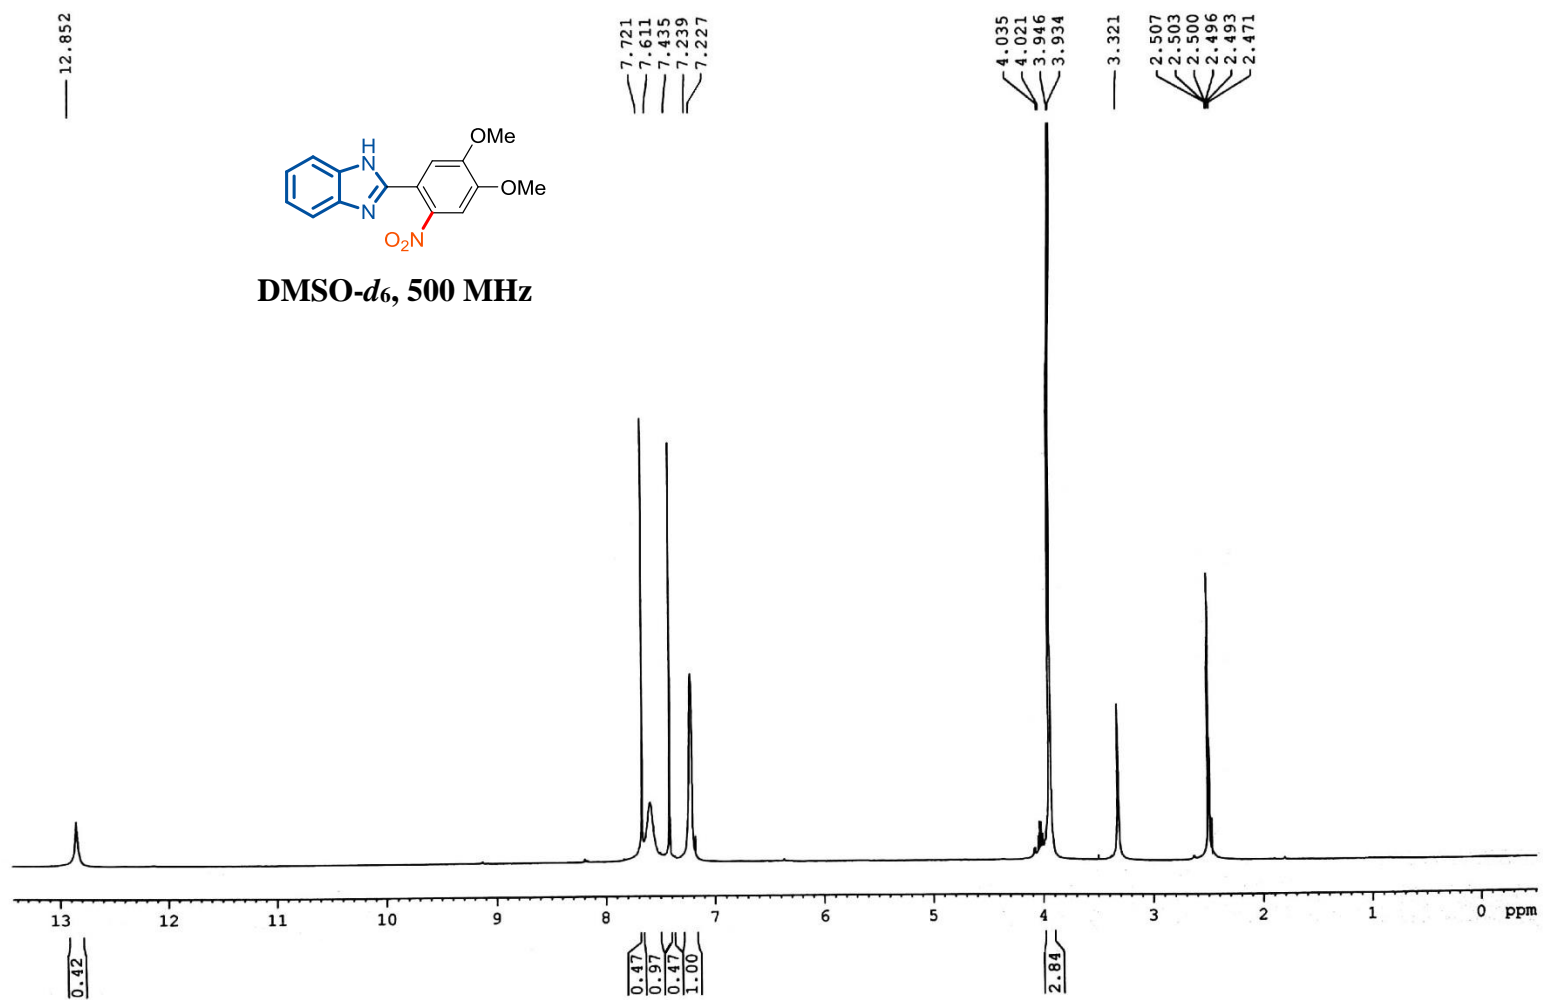

# <sup>13</sup>C NMR of compound 5f

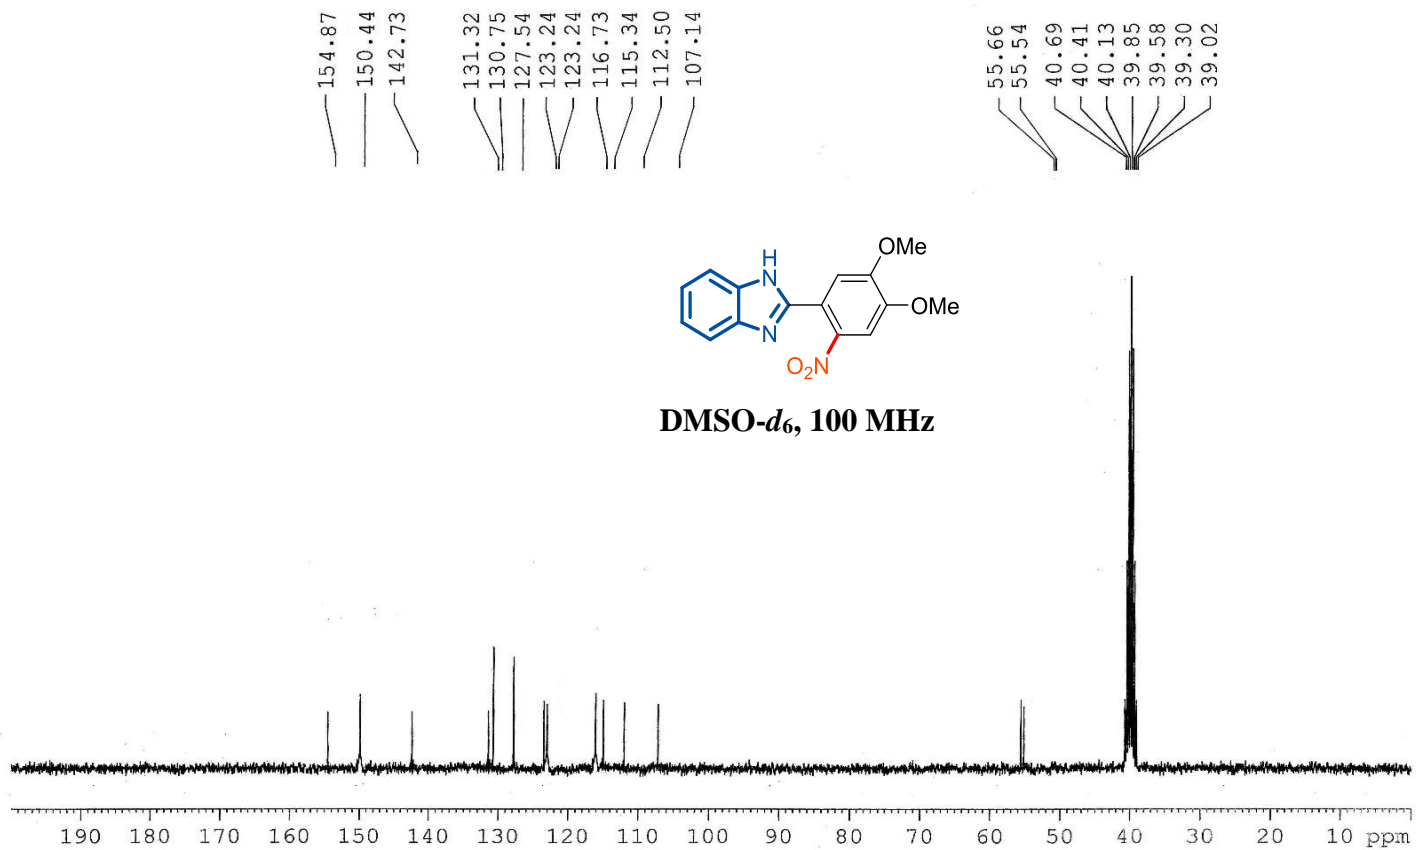

# $^1\text{H}$ NMR of compound 5g

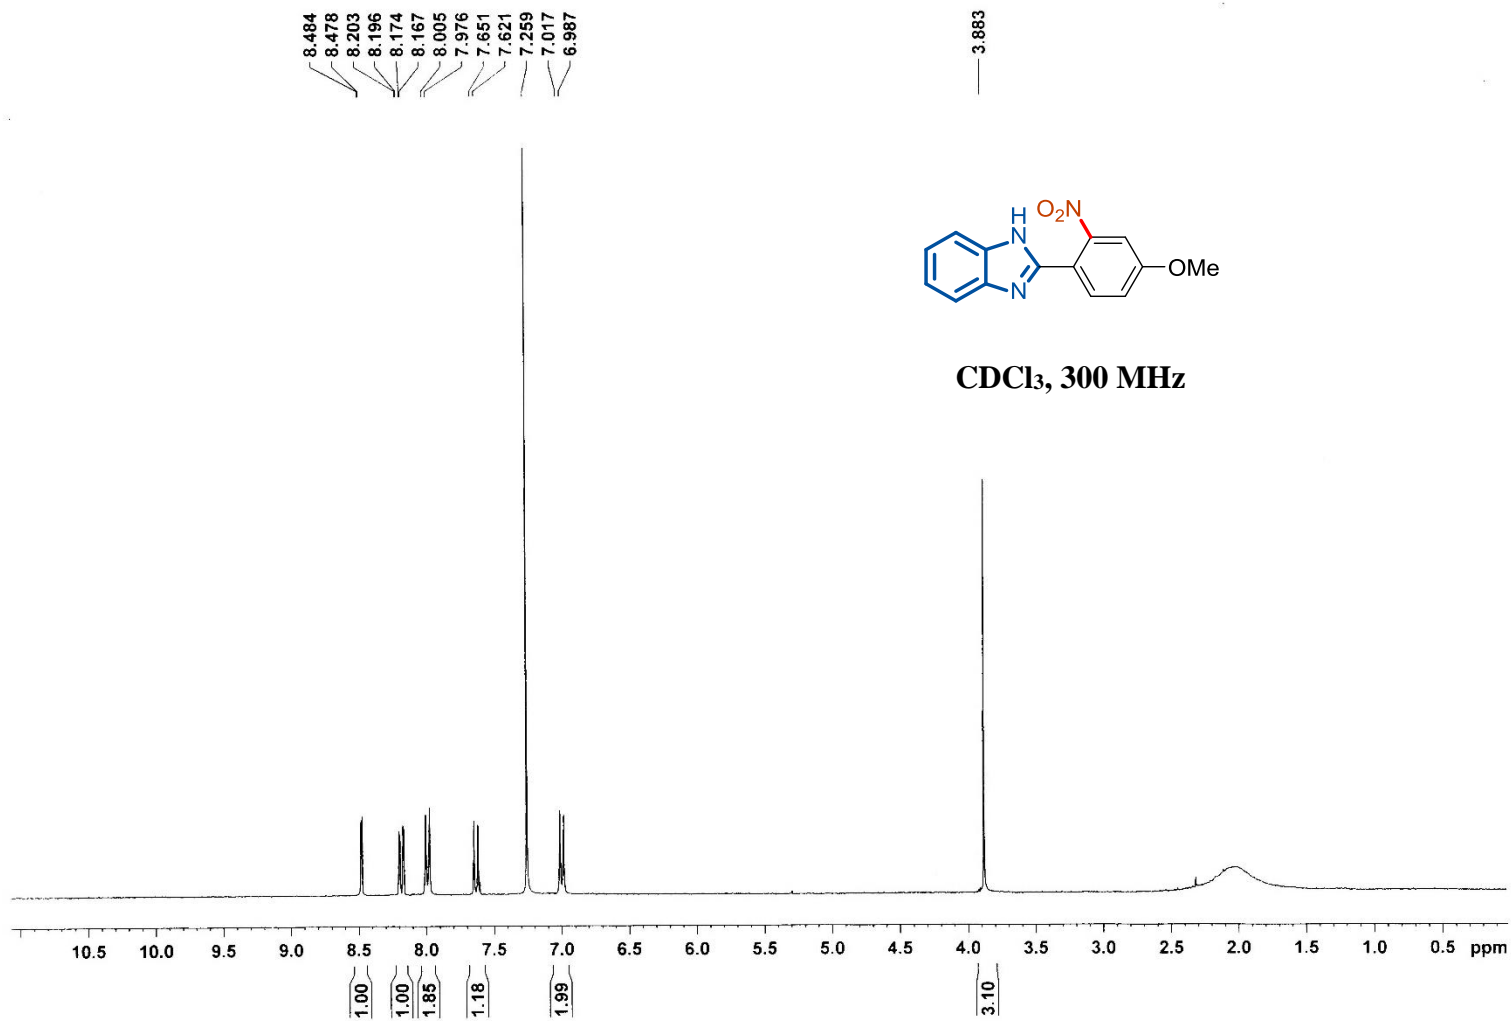



# $^{13}\text{C}$ NMR of compound 5g

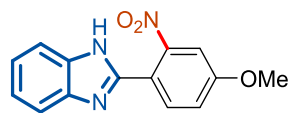

$\text{CDCl}_3$ , 100 MHz

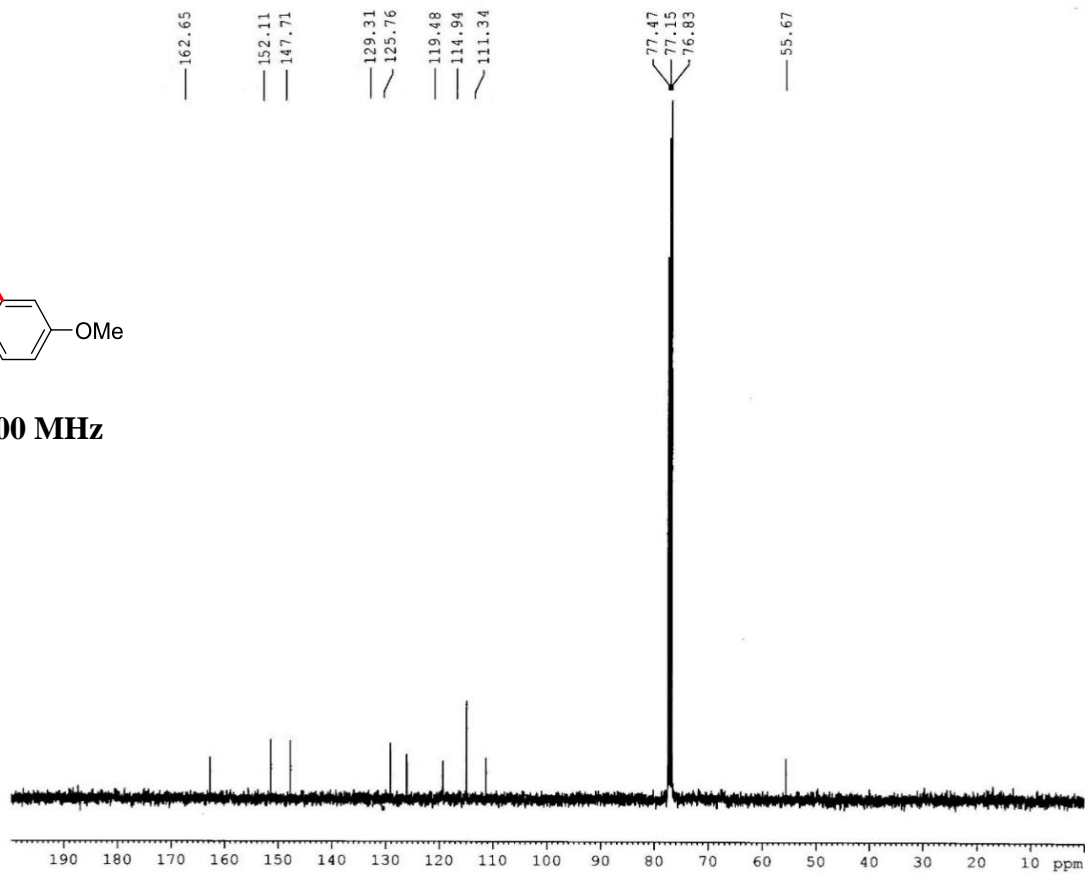

# <sup>1</sup>H NMR of compound 5h

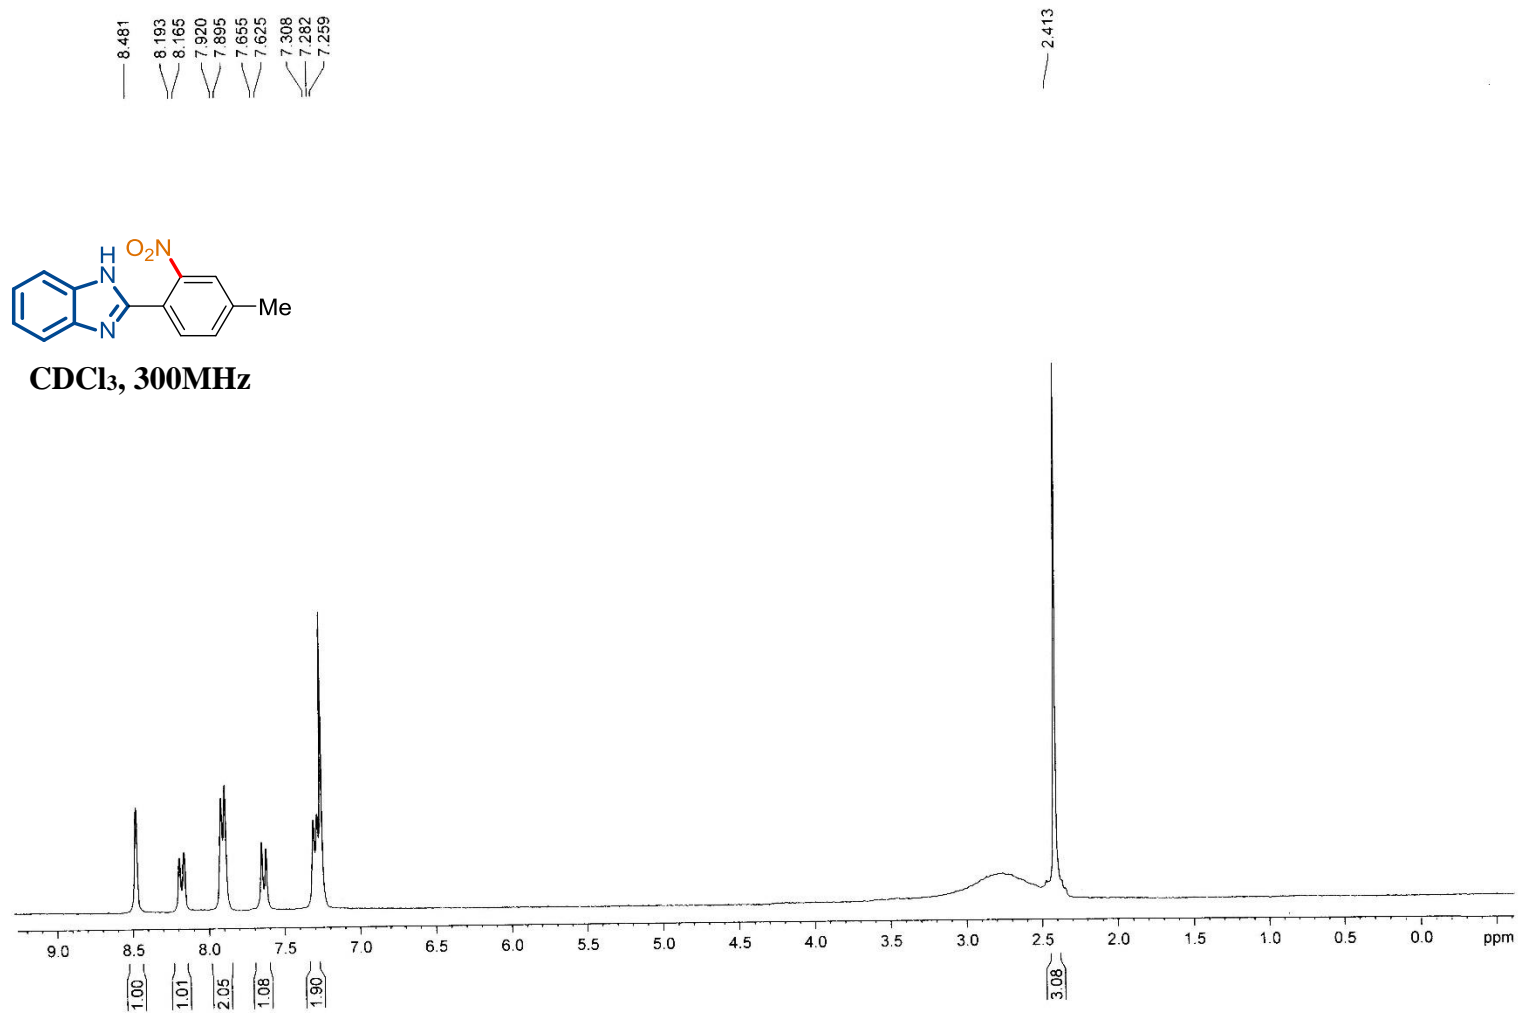

# $^{13}\text{C}$ NMR of compound 5h

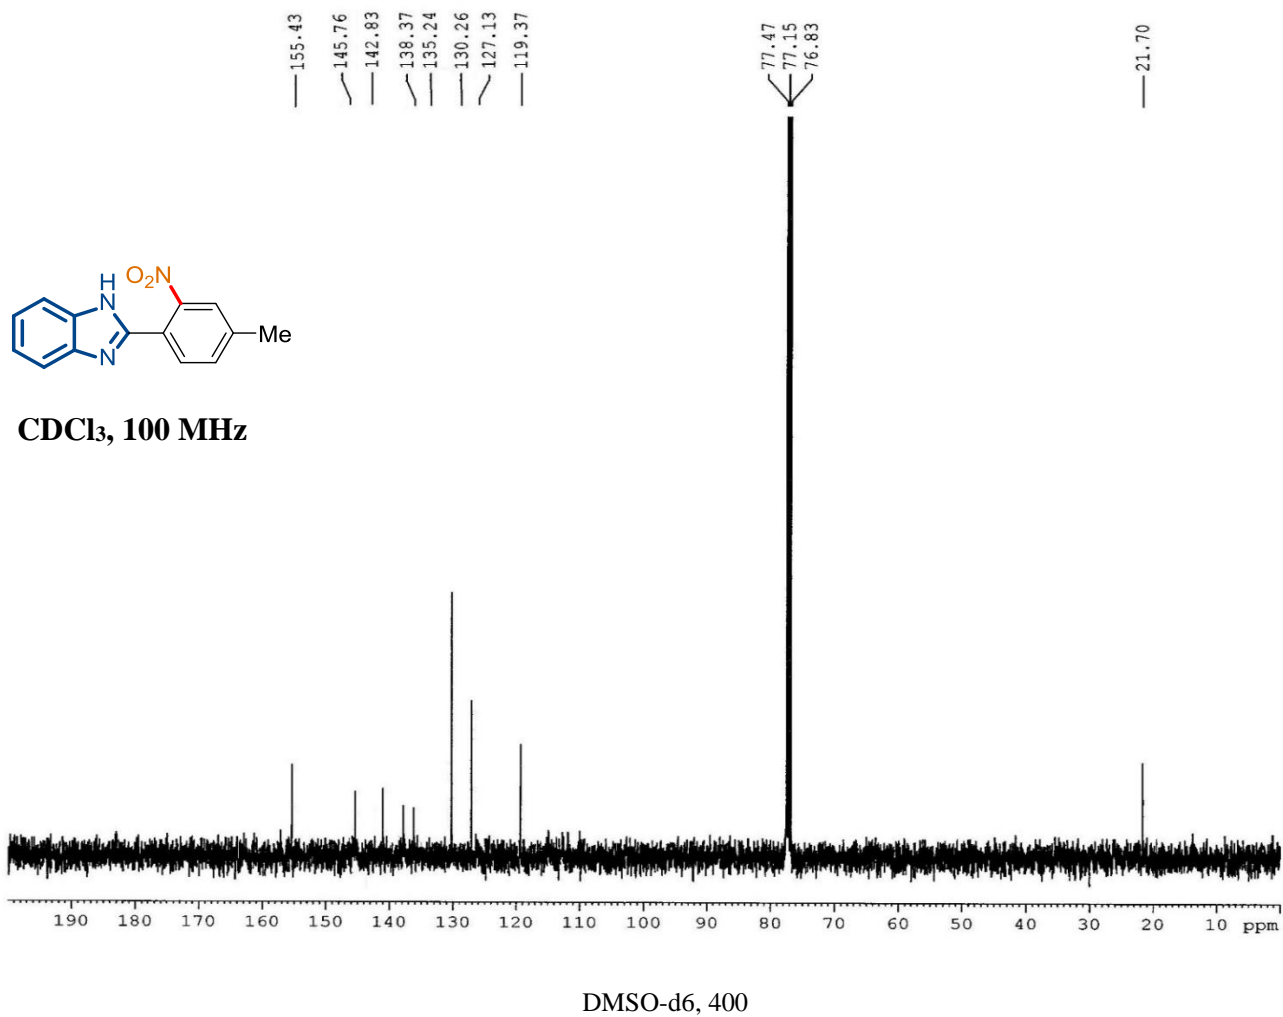

# <sup>1</sup>H NMR of compound 5i

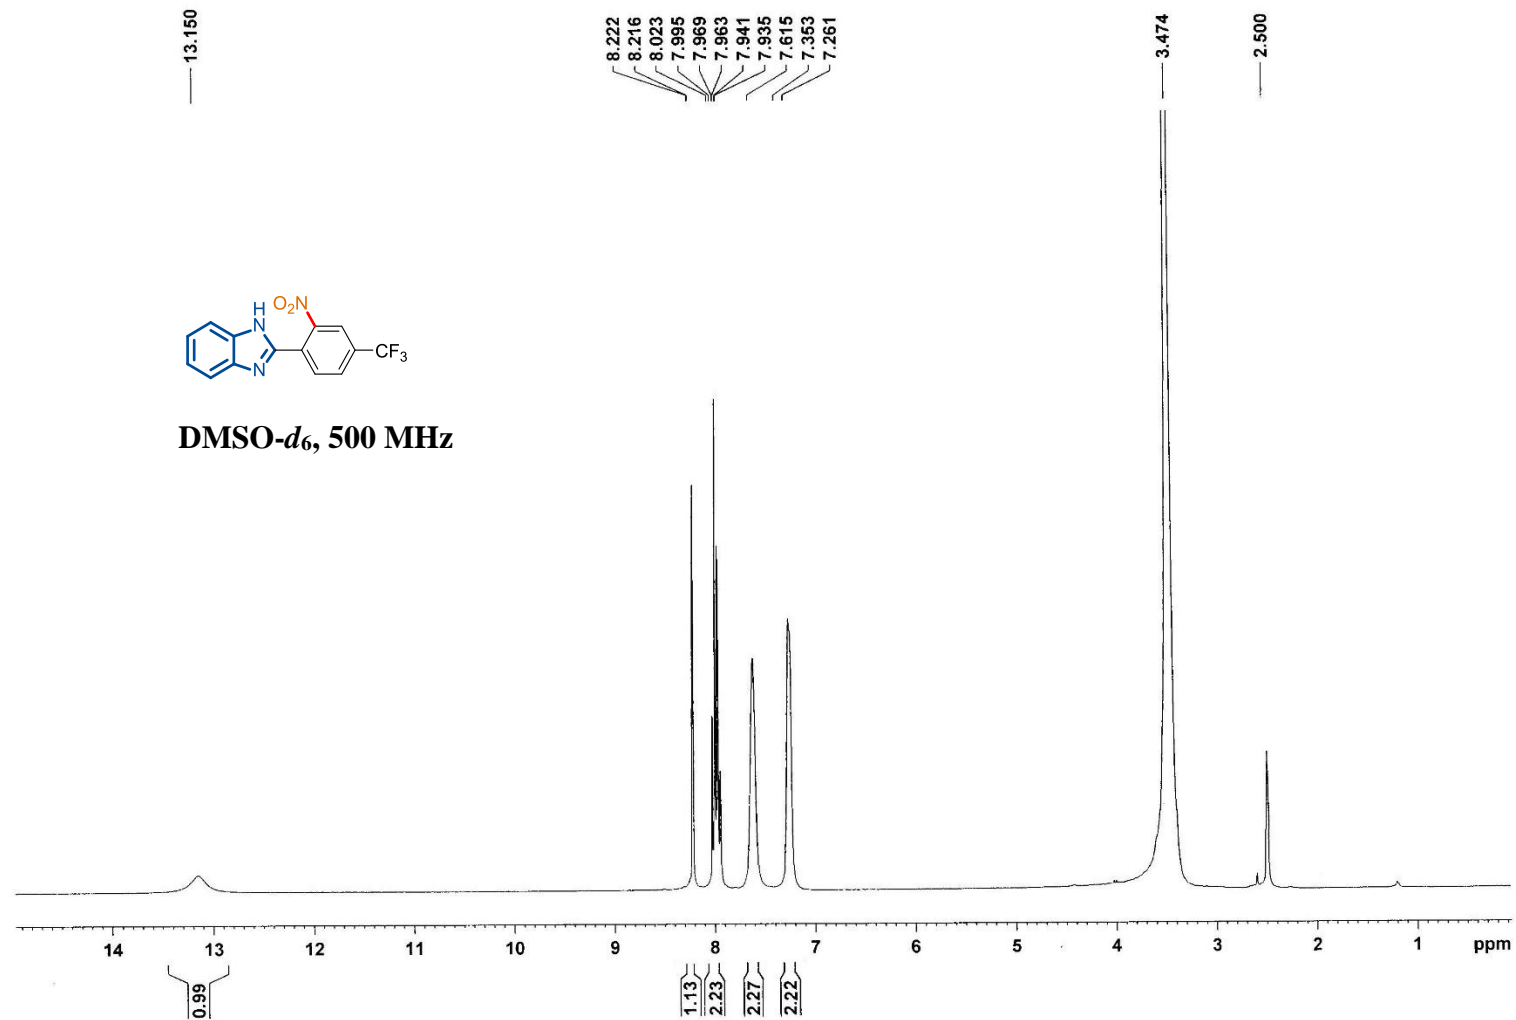

# <sup>13</sup>C NMR of compound 5i

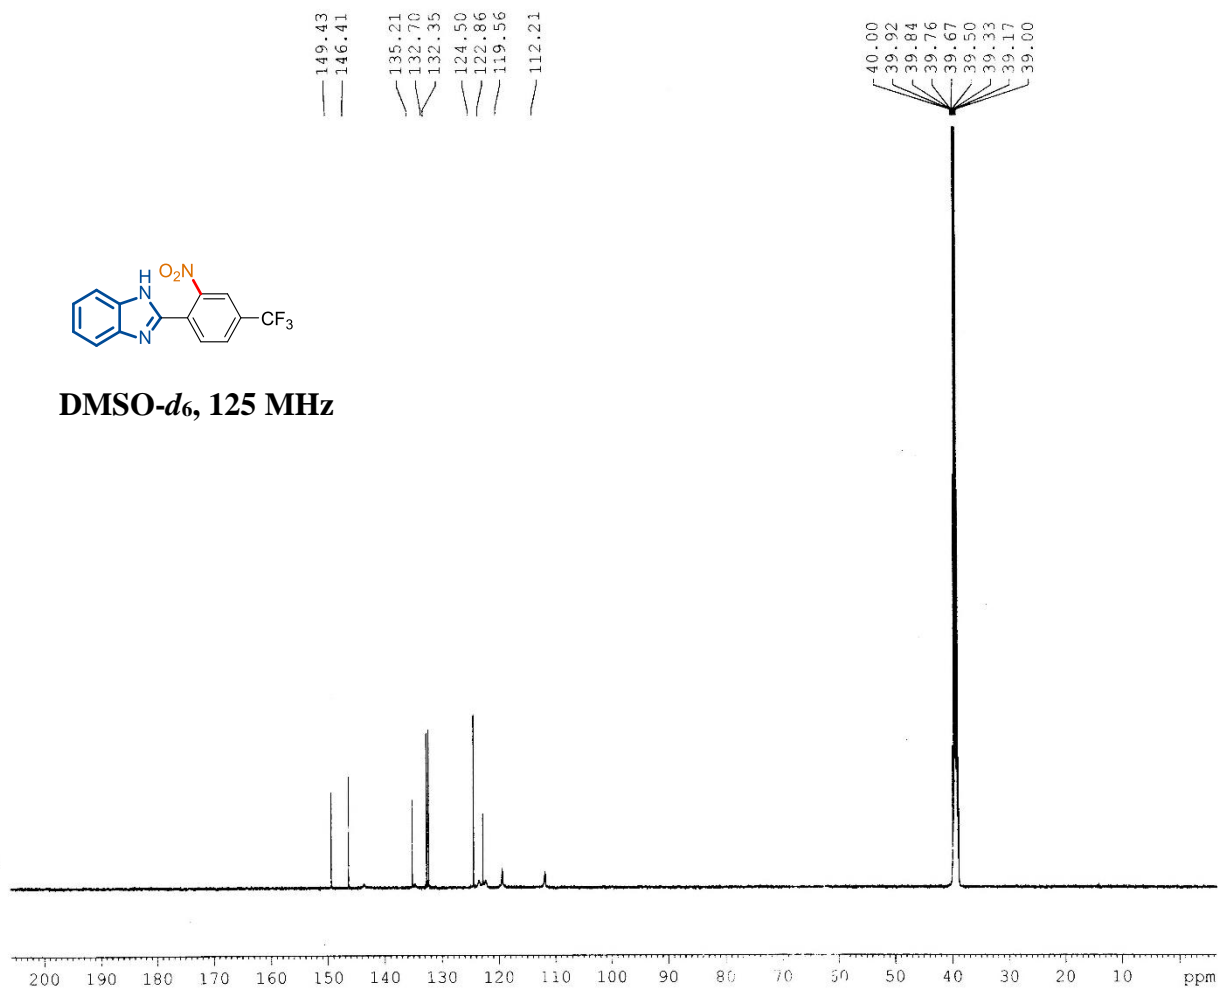

# <sup>1</sup>H NMR of compound 5j

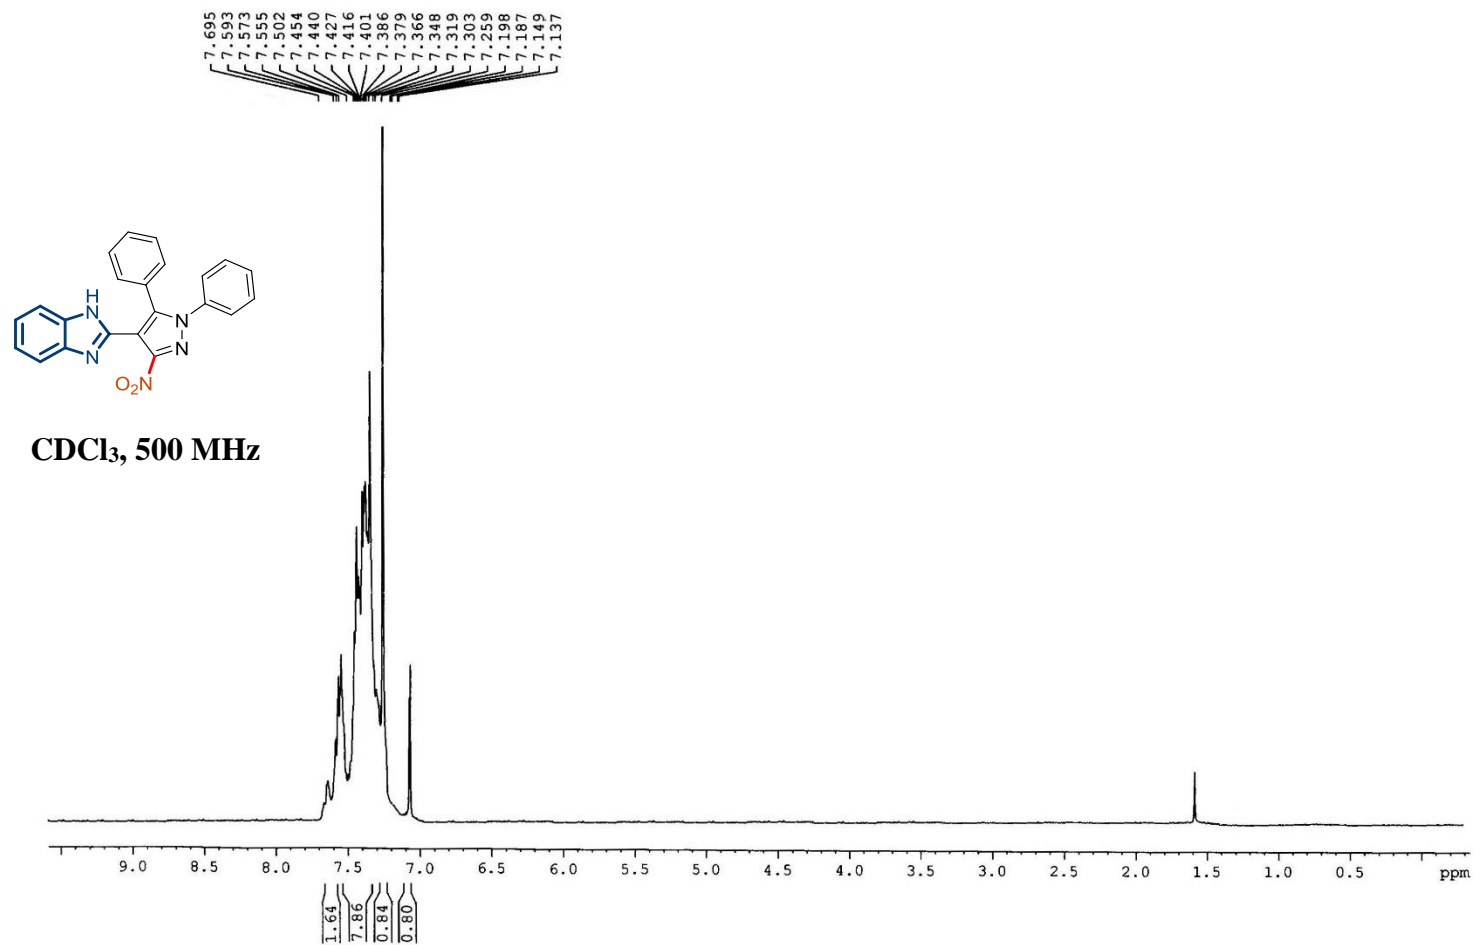

# <sup>13</sup>C NMR of compound 5j

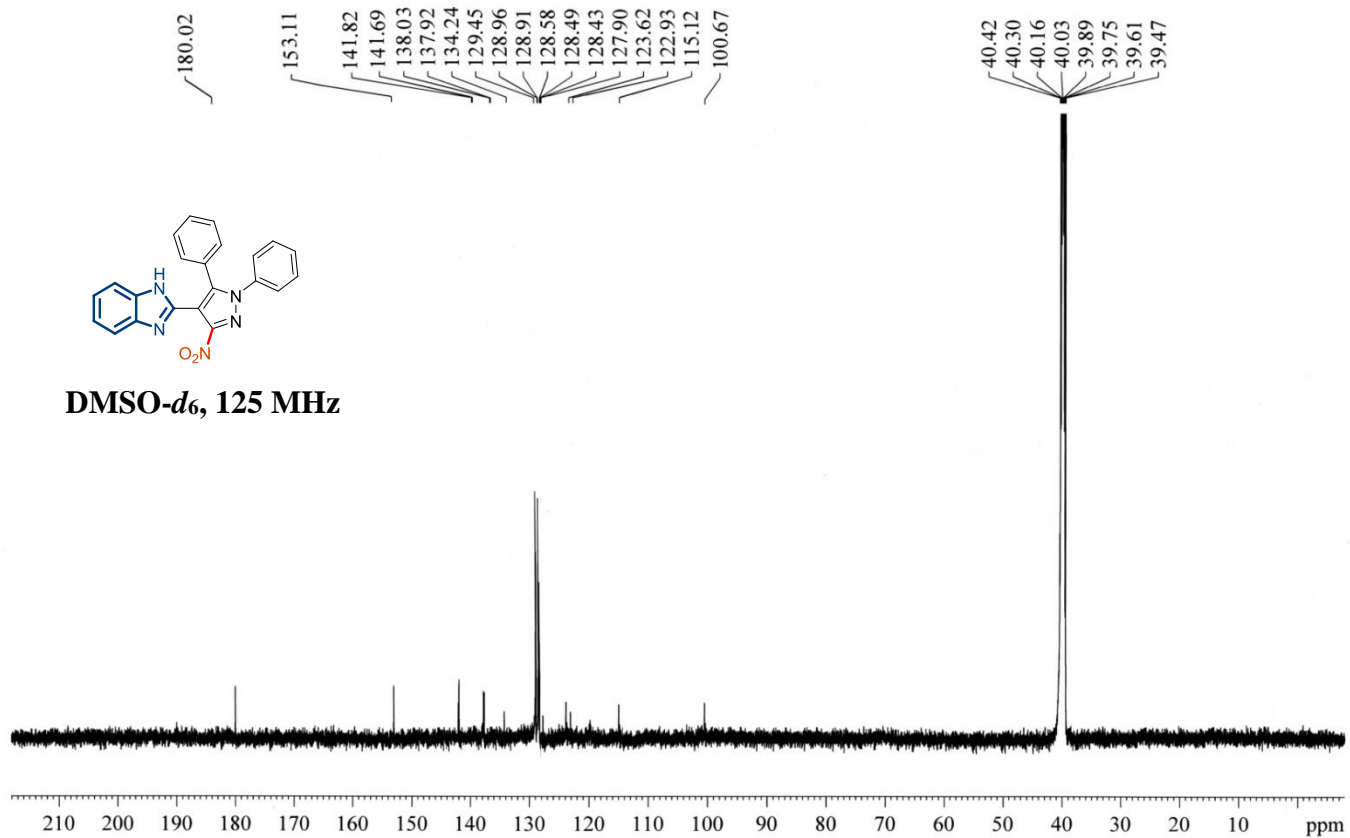

# <sup>1</sup>H NMR of compound 5k

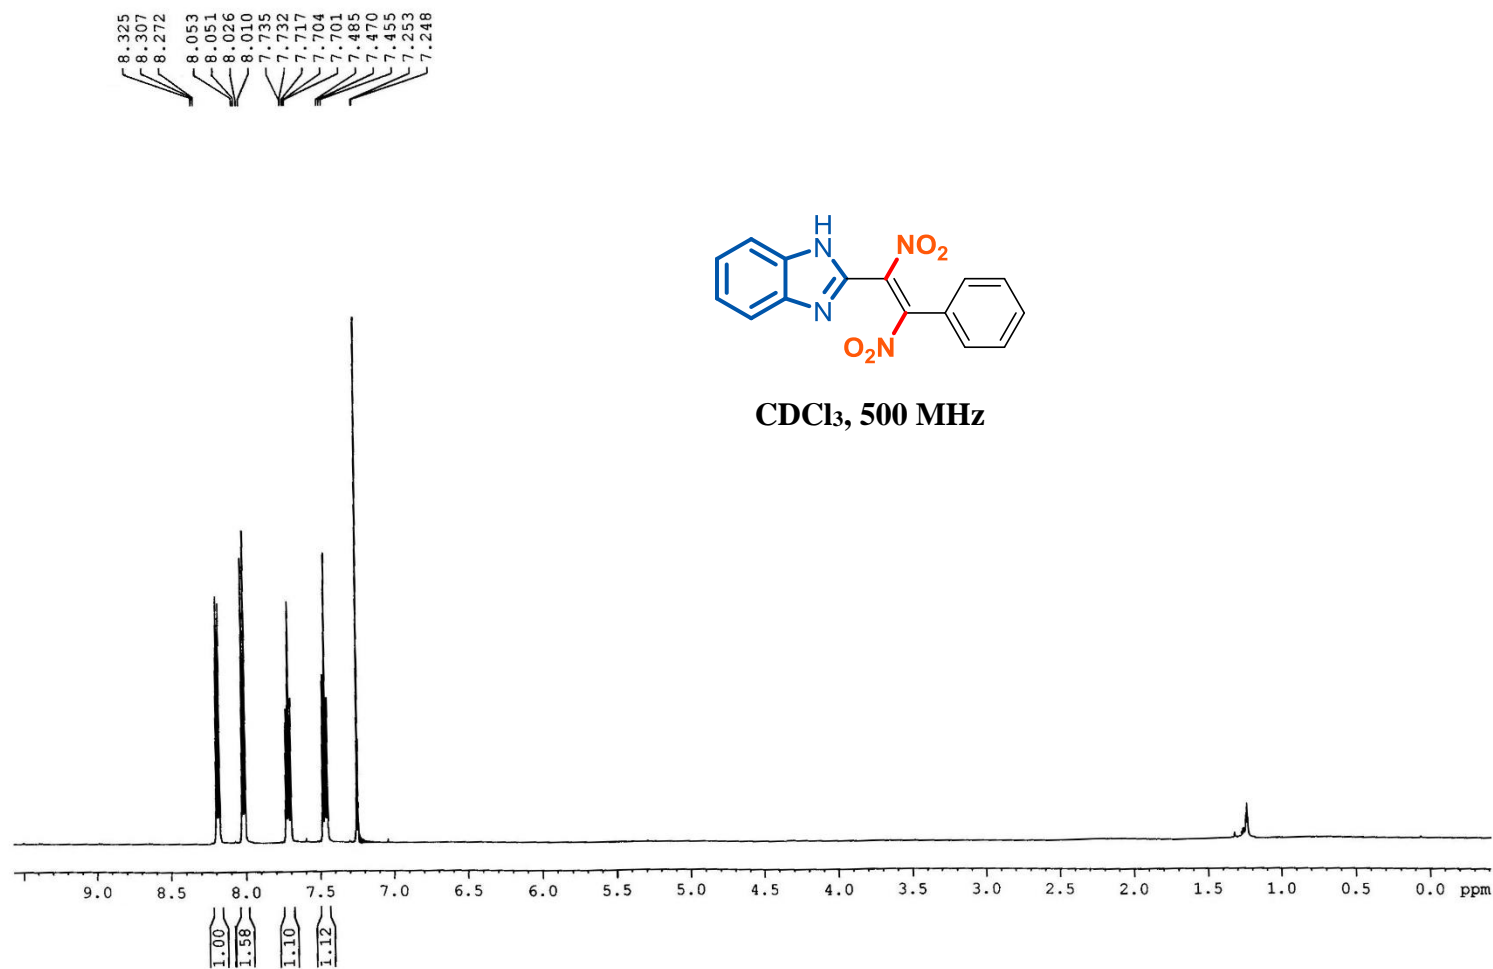



# <sup>13</sup>C NMR of compound 5k

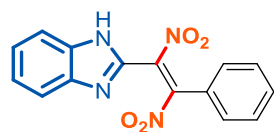

DMSO-d<sub>6</sub>, 100 MHz

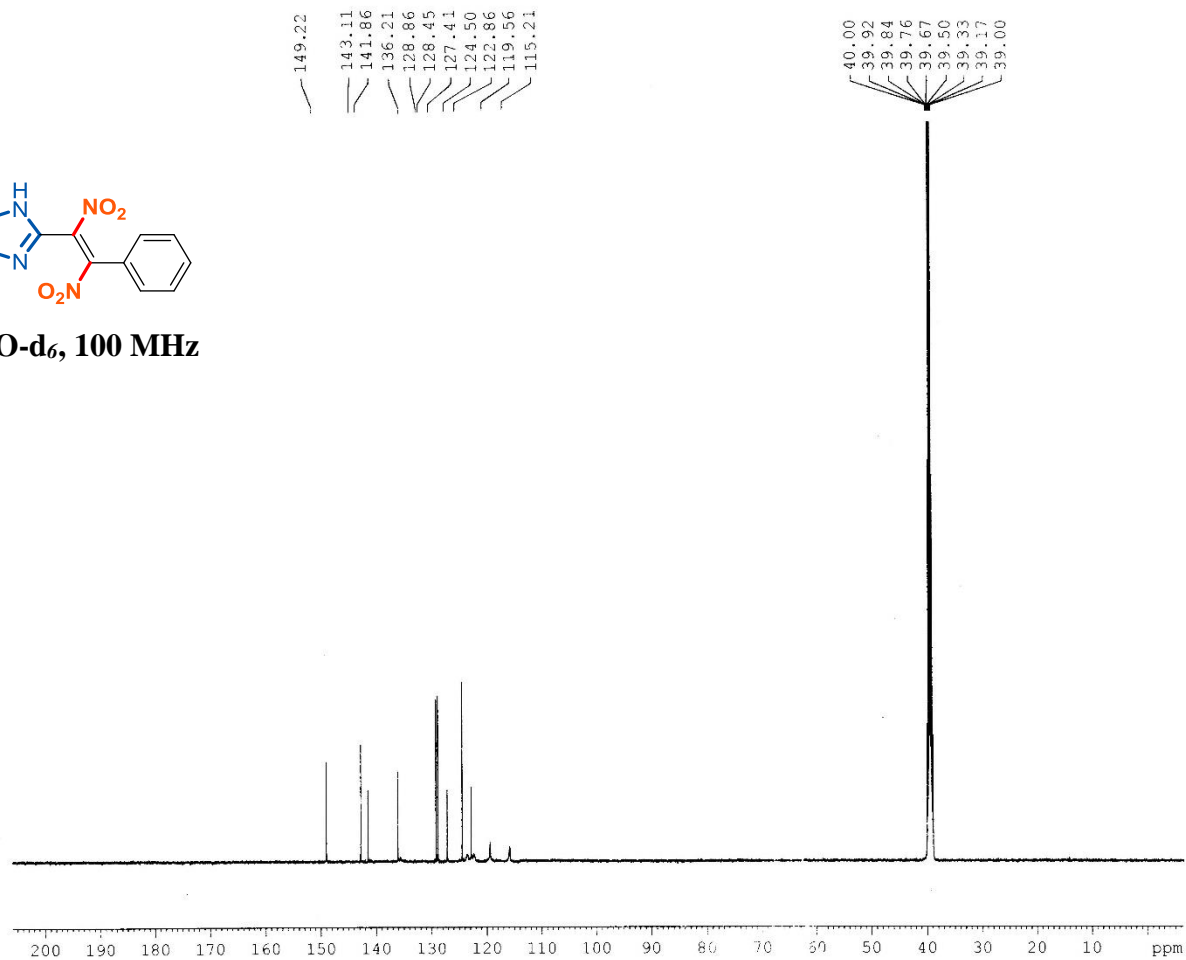

# $^1\text{H}$ NMR of compound 5l

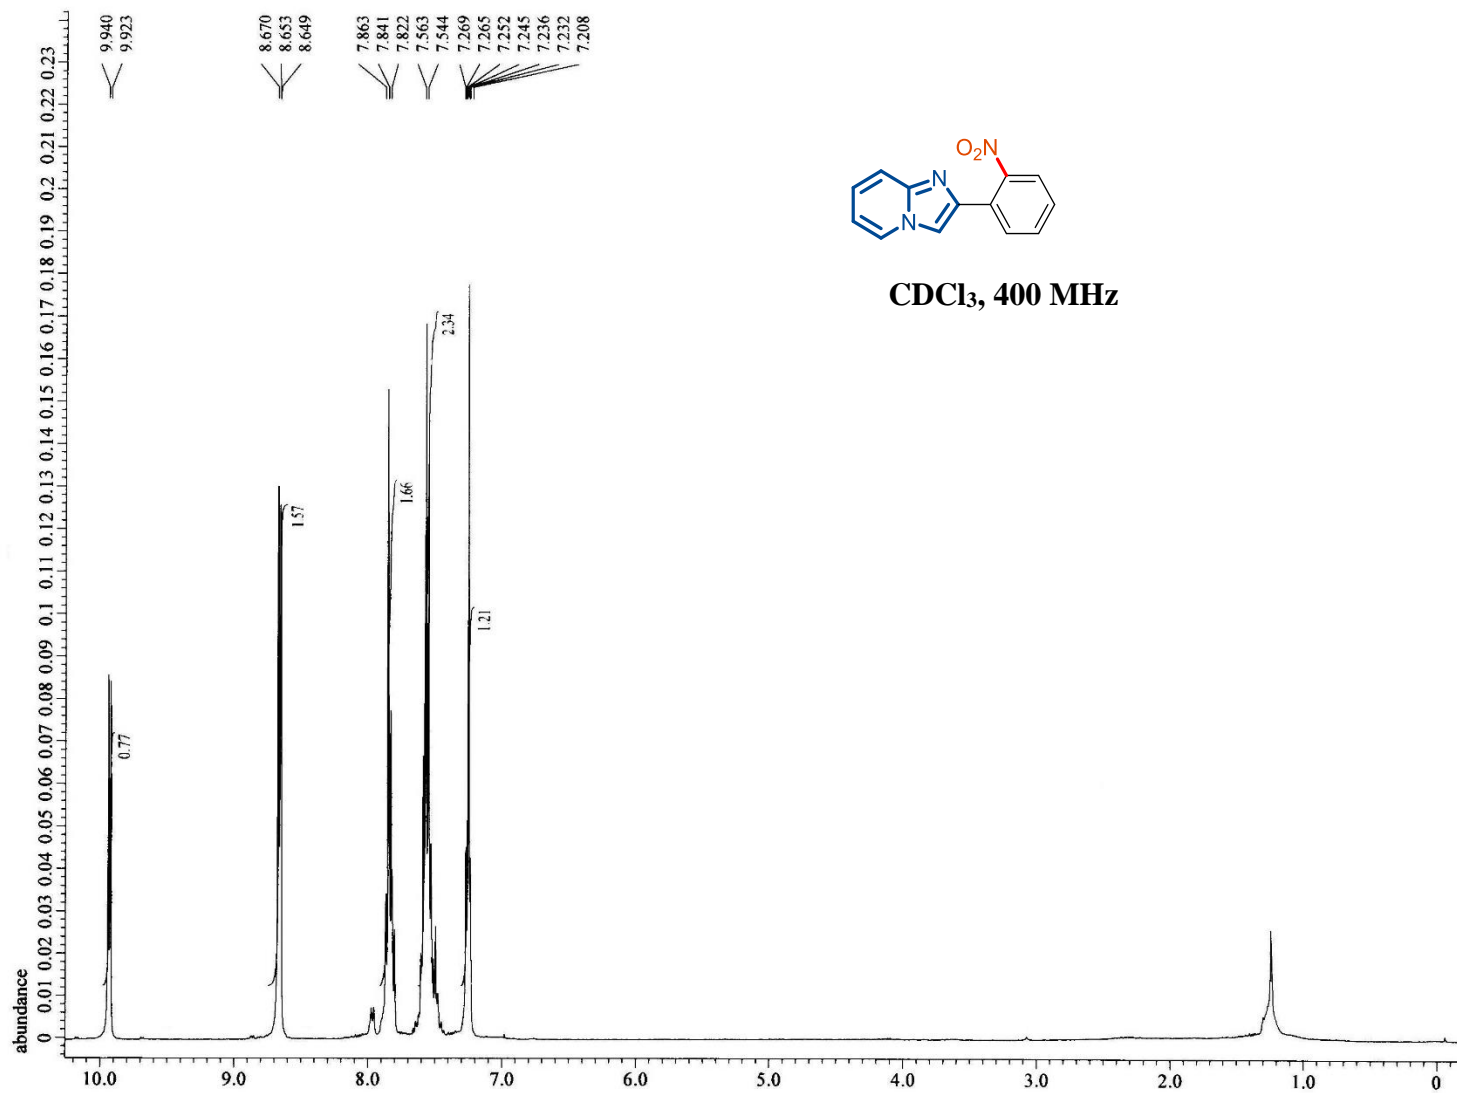

# $^{13}\text{C}$ NMR of compound 5l

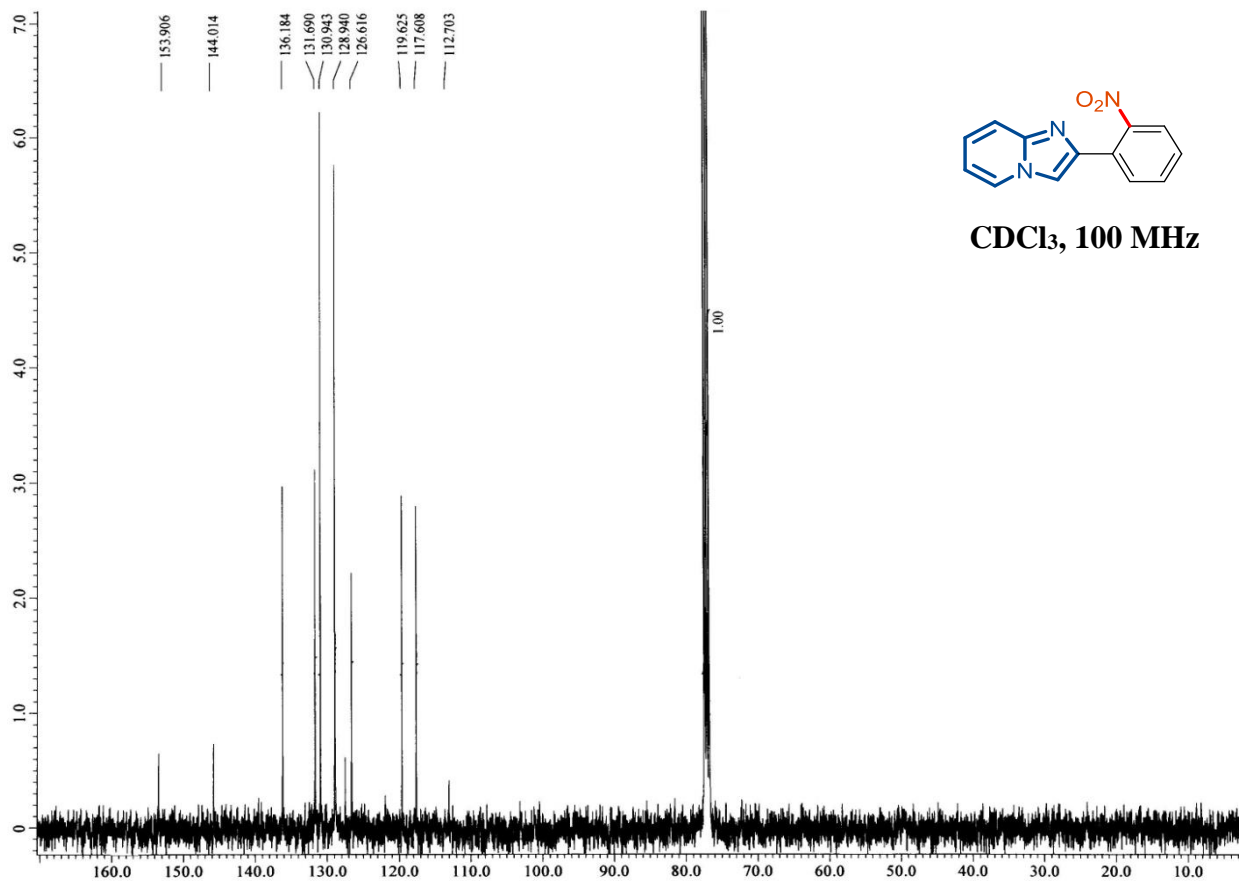

# $^1\text{H}$ NMR of compound 5m

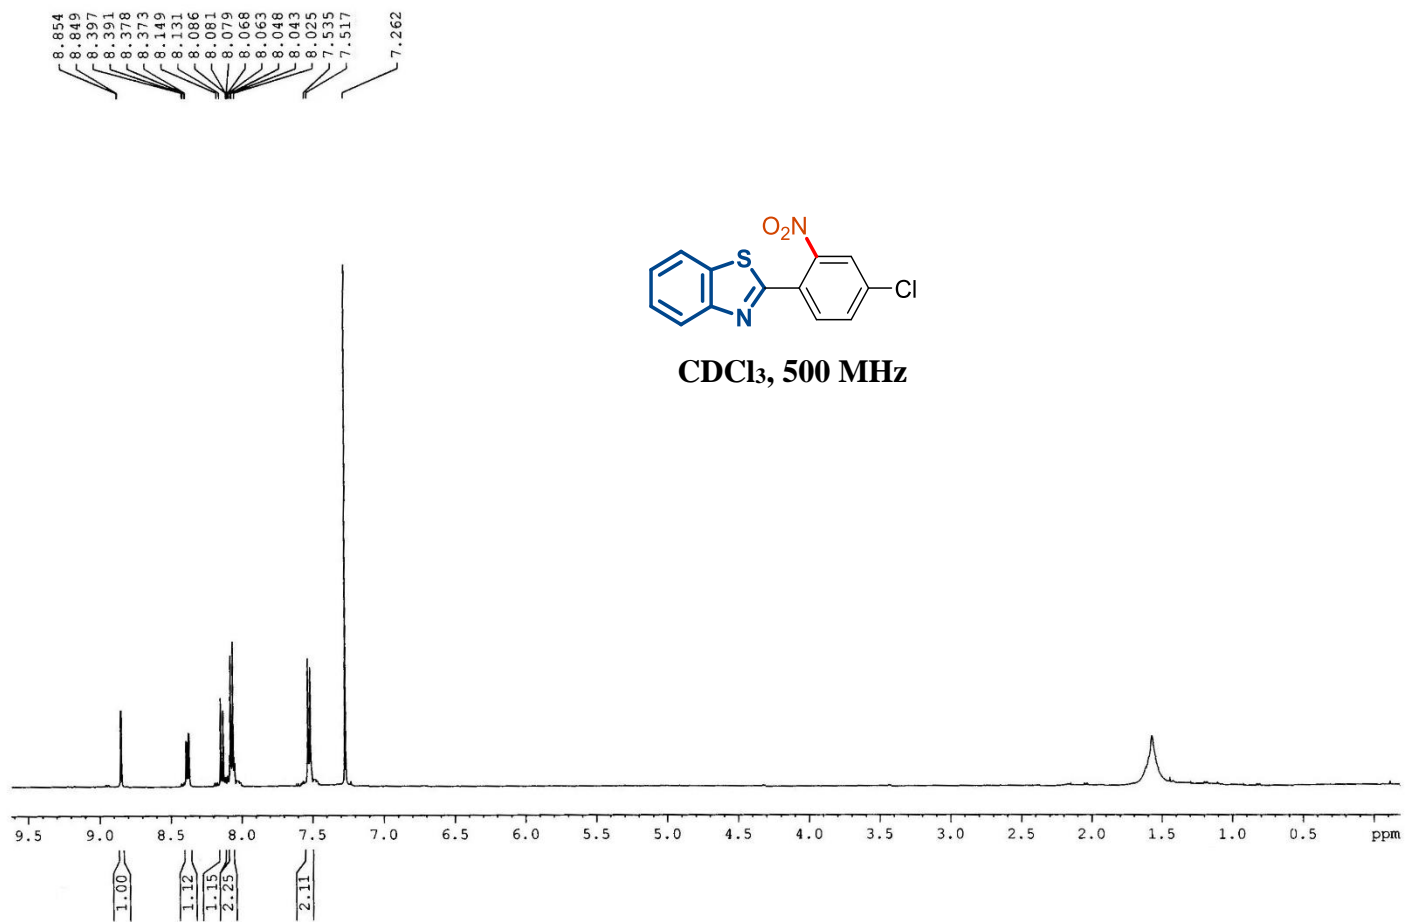

# $^{13}\text{C}$ NMR of compound 5m

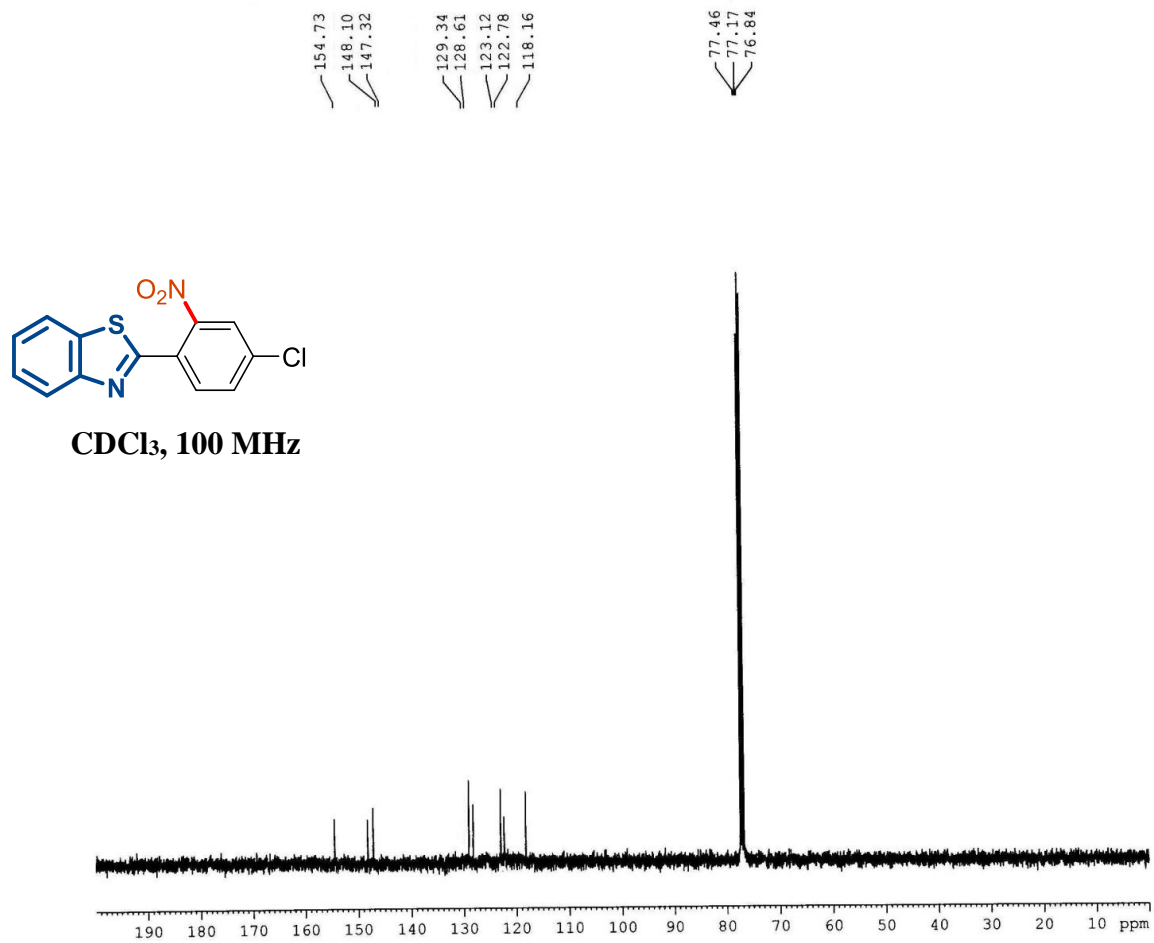

# <sup>1</sup>H NMR of compound 5n

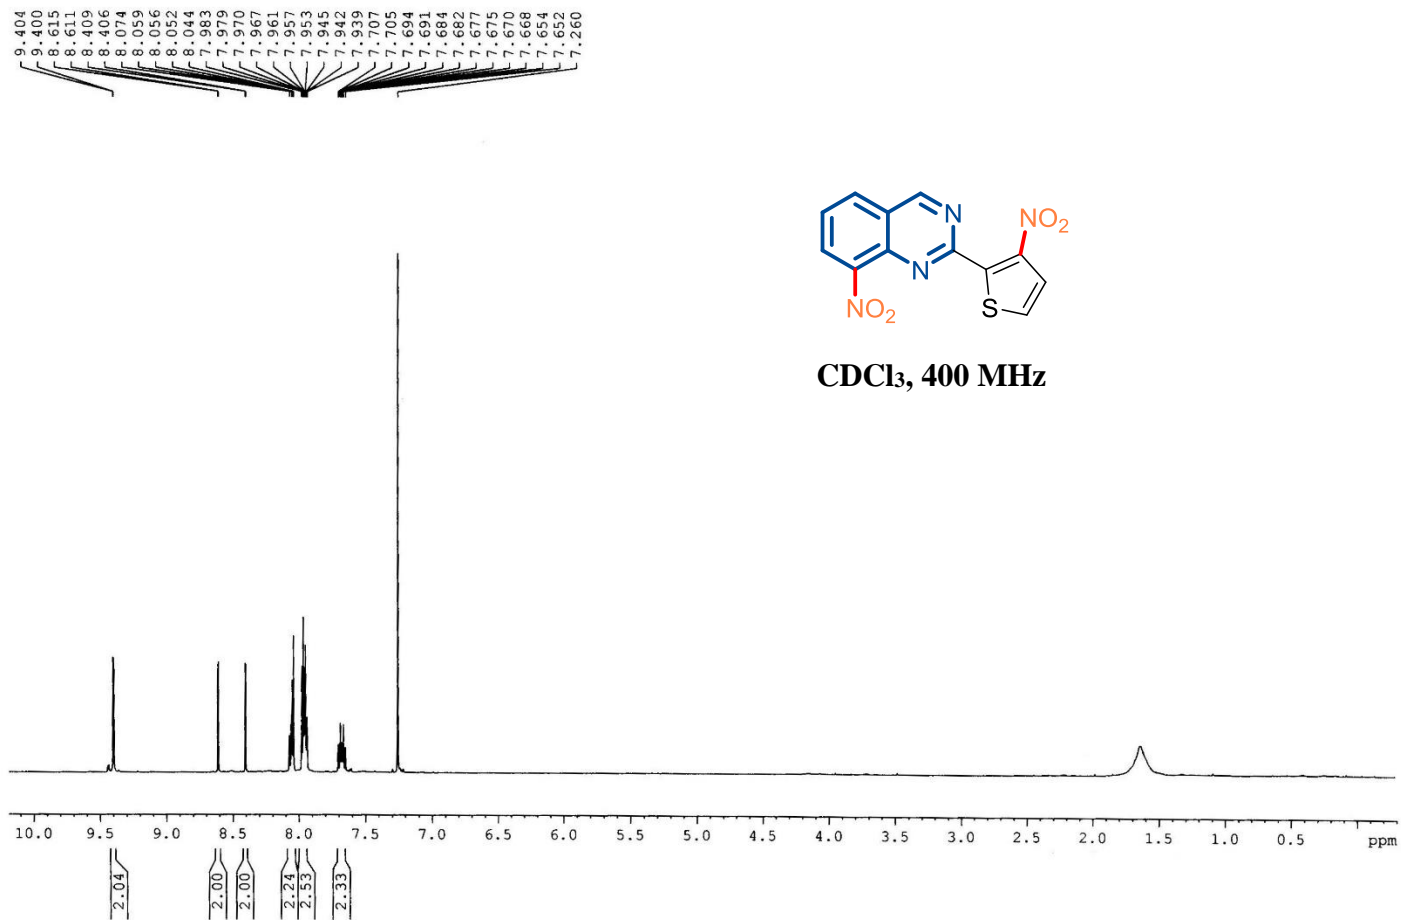

# $^{13}\text{C}$ NMR of compound 5n

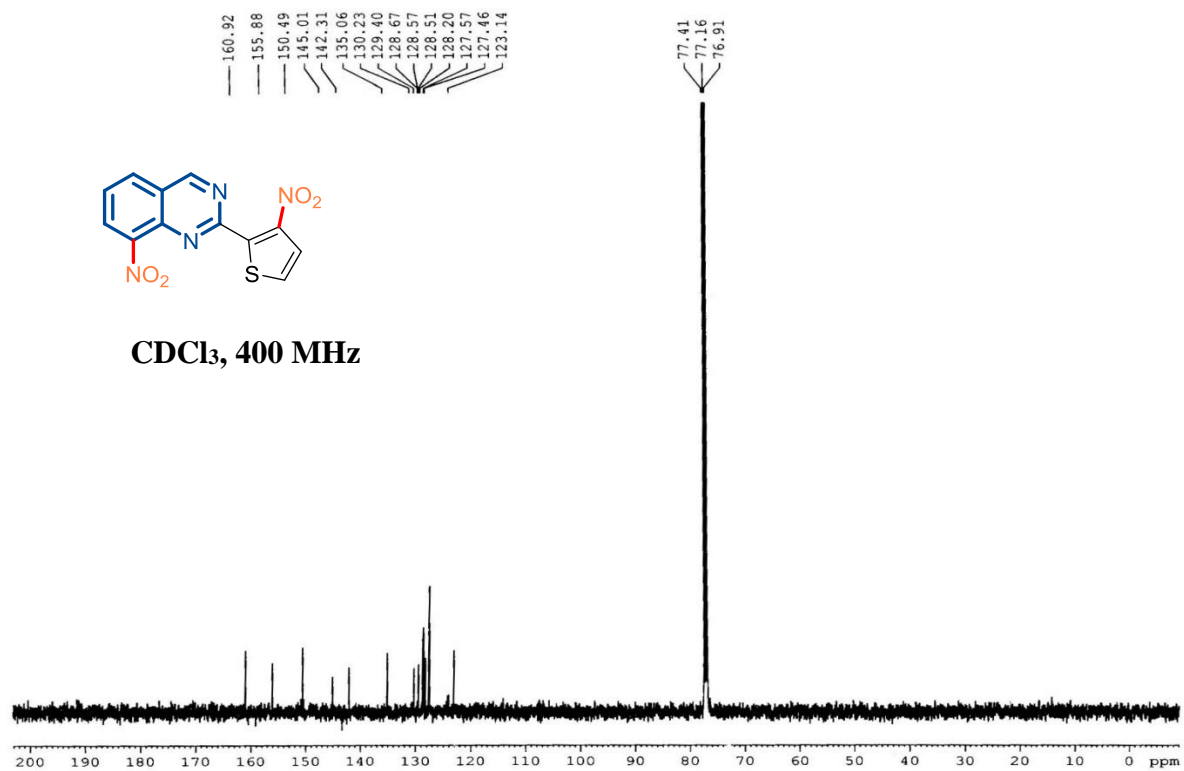

# $^1\text{H}$ NMR of compound 5o

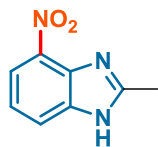

DMSO- $d_6$ , 400 MHz

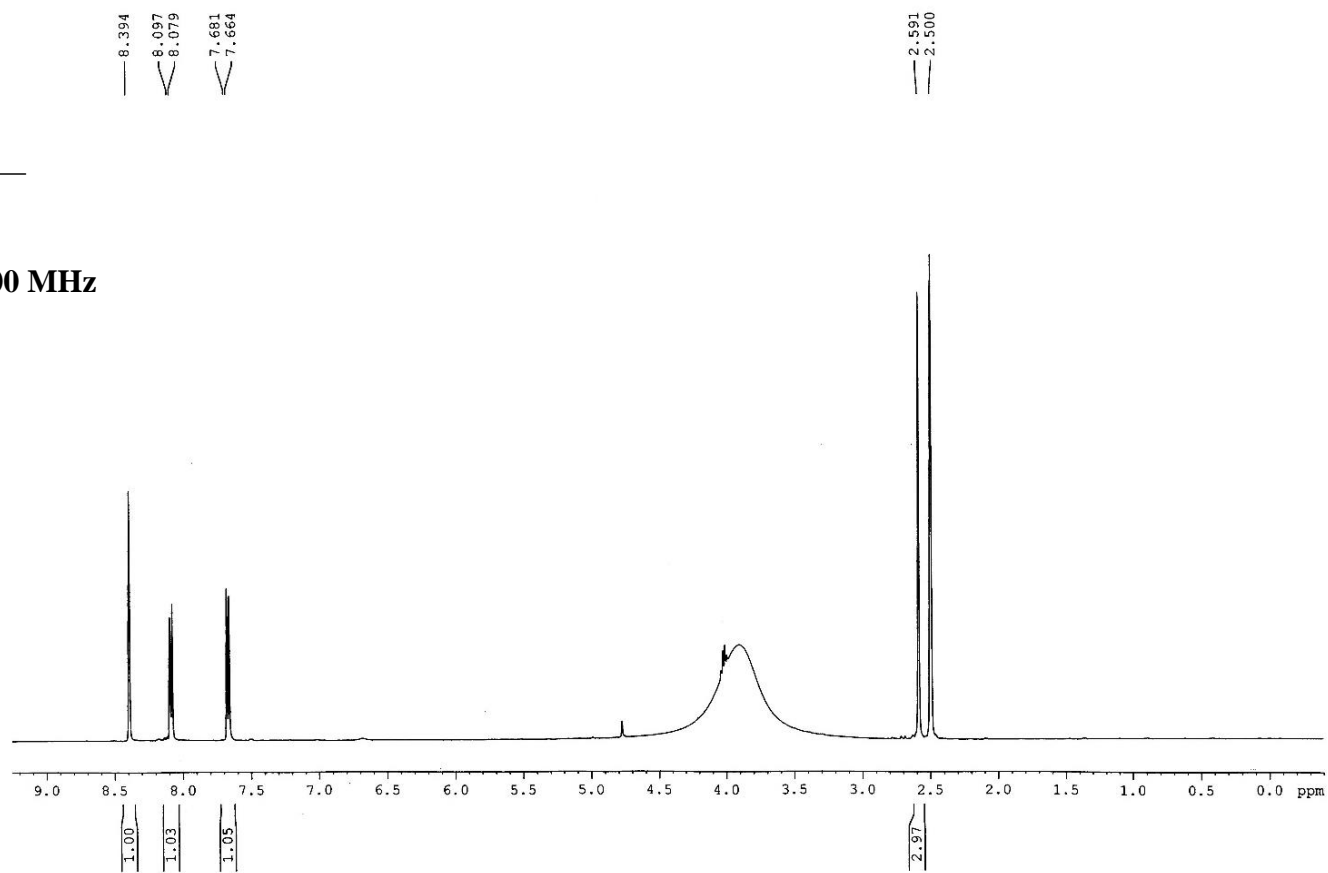



# $^{13}\text{C}$ NMR of compound 5o

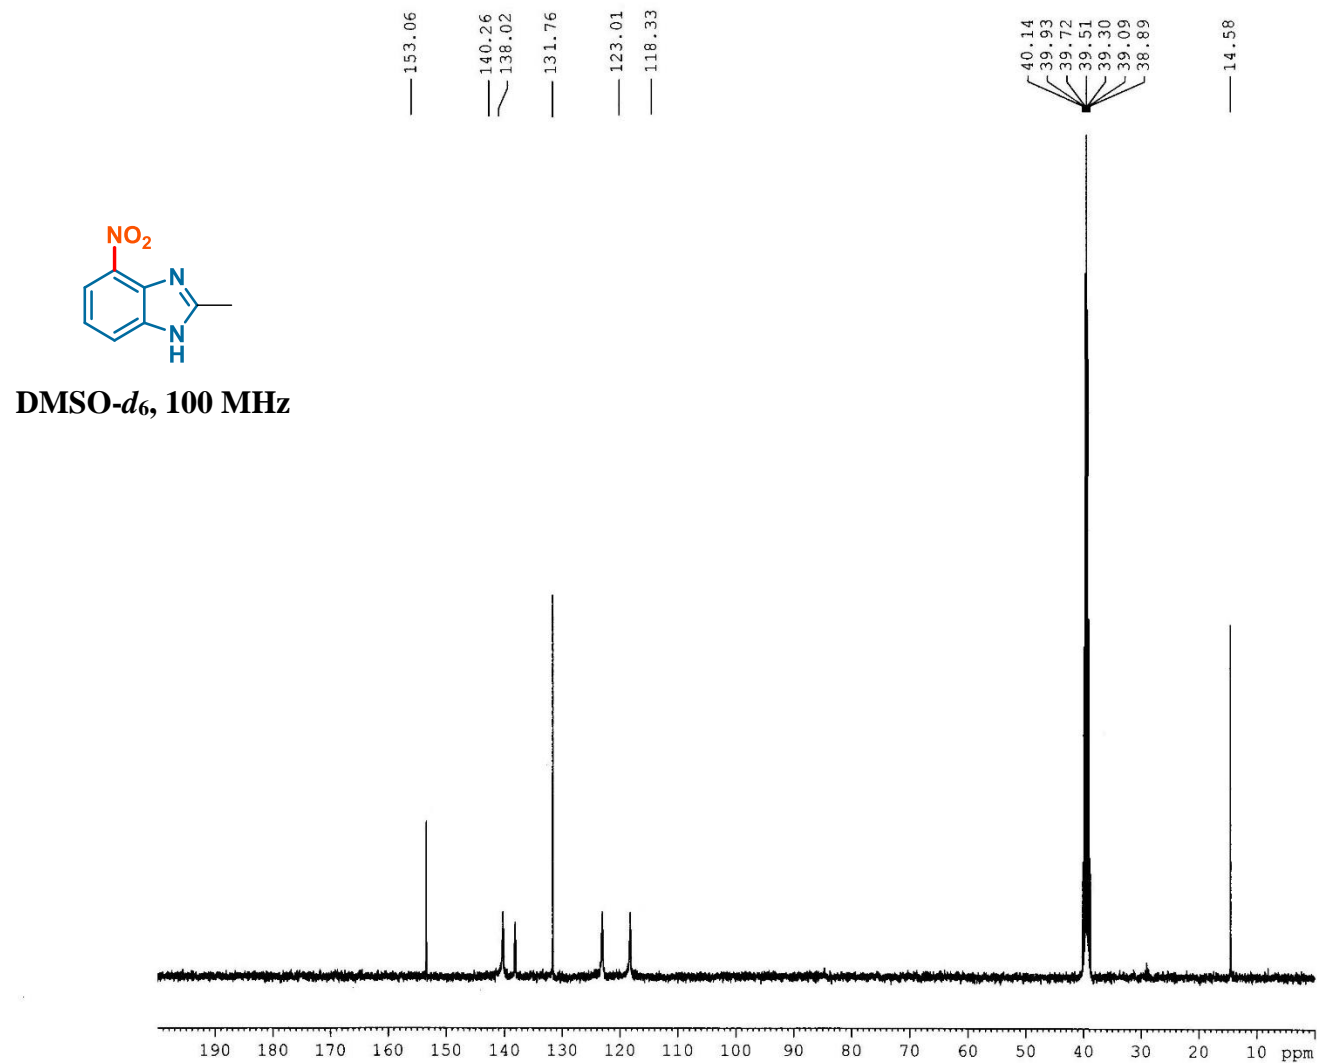

# <sup>1</sup>H NMR of compound 5p

8.472  
8.465  
8.228  
8.220  
8.212  
8.209  
8.202  
8.196  
8.147  
8.140  
8.118  
8.110  
7.779  
7.749  
7.623  
7.618  
7.607  
7.596  
7.588  
7.582  
7.573  
7.566

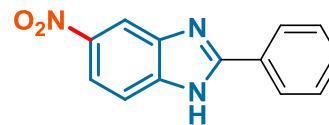

DMSO-*d*<sub>6</sub>, 500 MHz

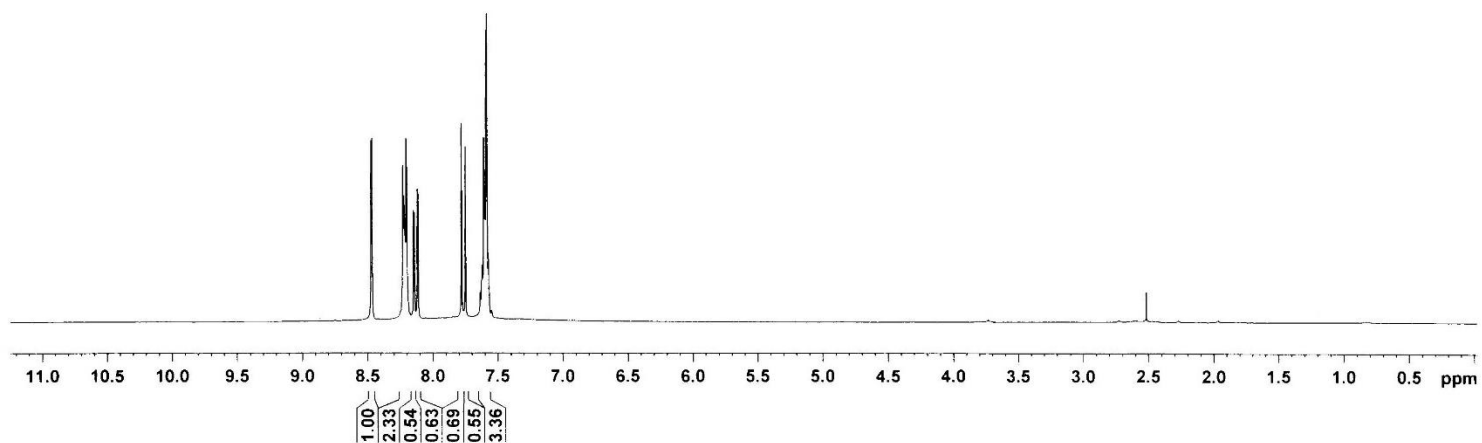

# <sup>13</sup>C NMR of compound 5p

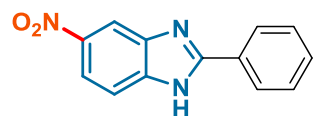

DMSO-*d*<sub>6</sub>, 100 MHz

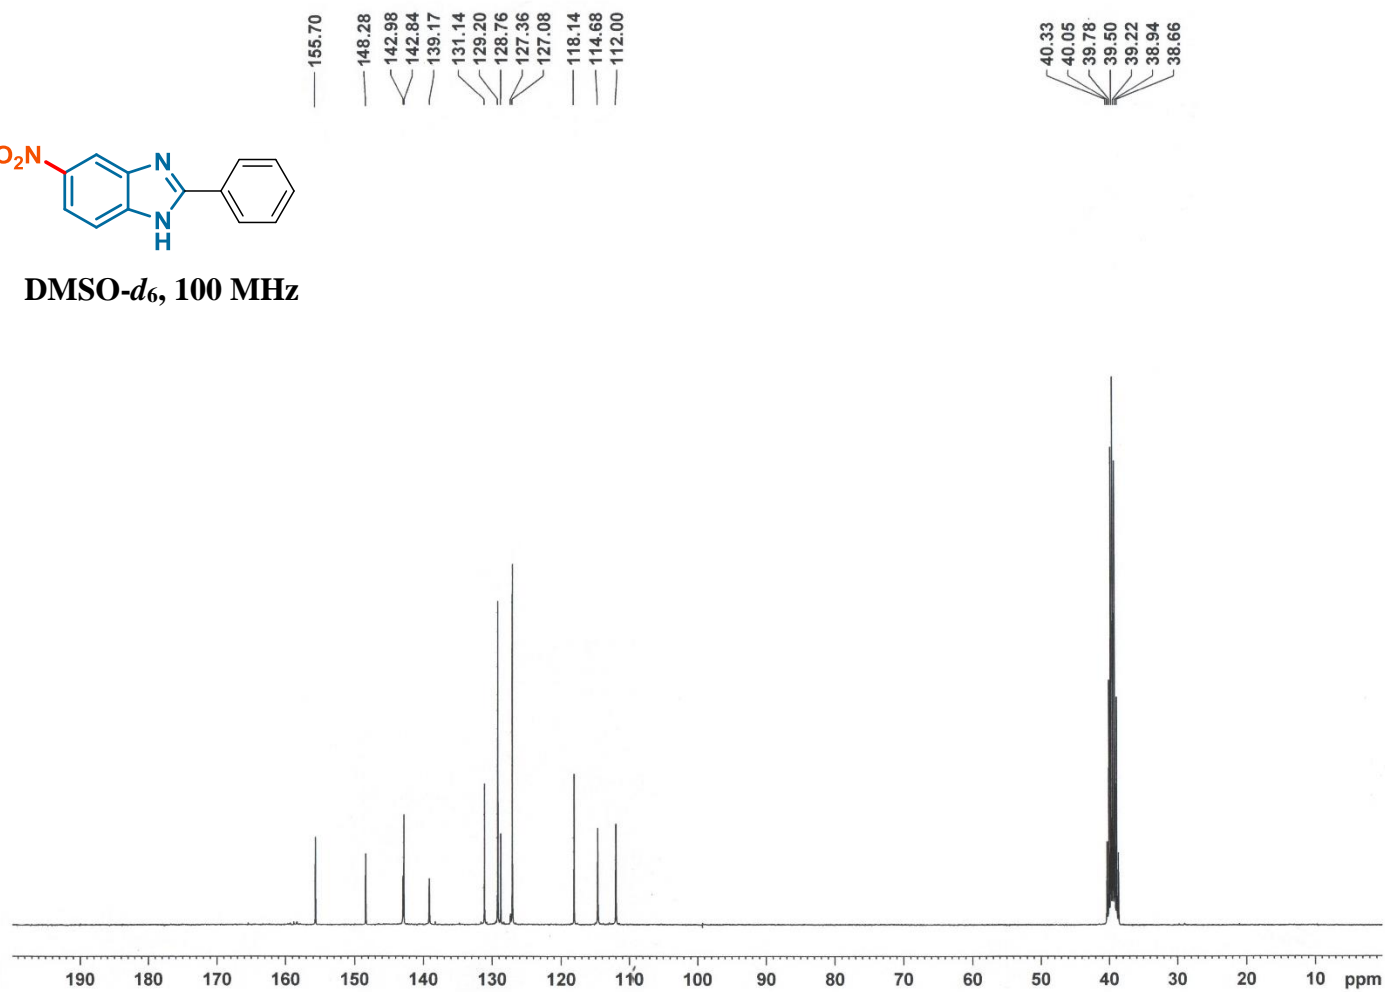

# $^1\text{H}$ NMR of compound 5q

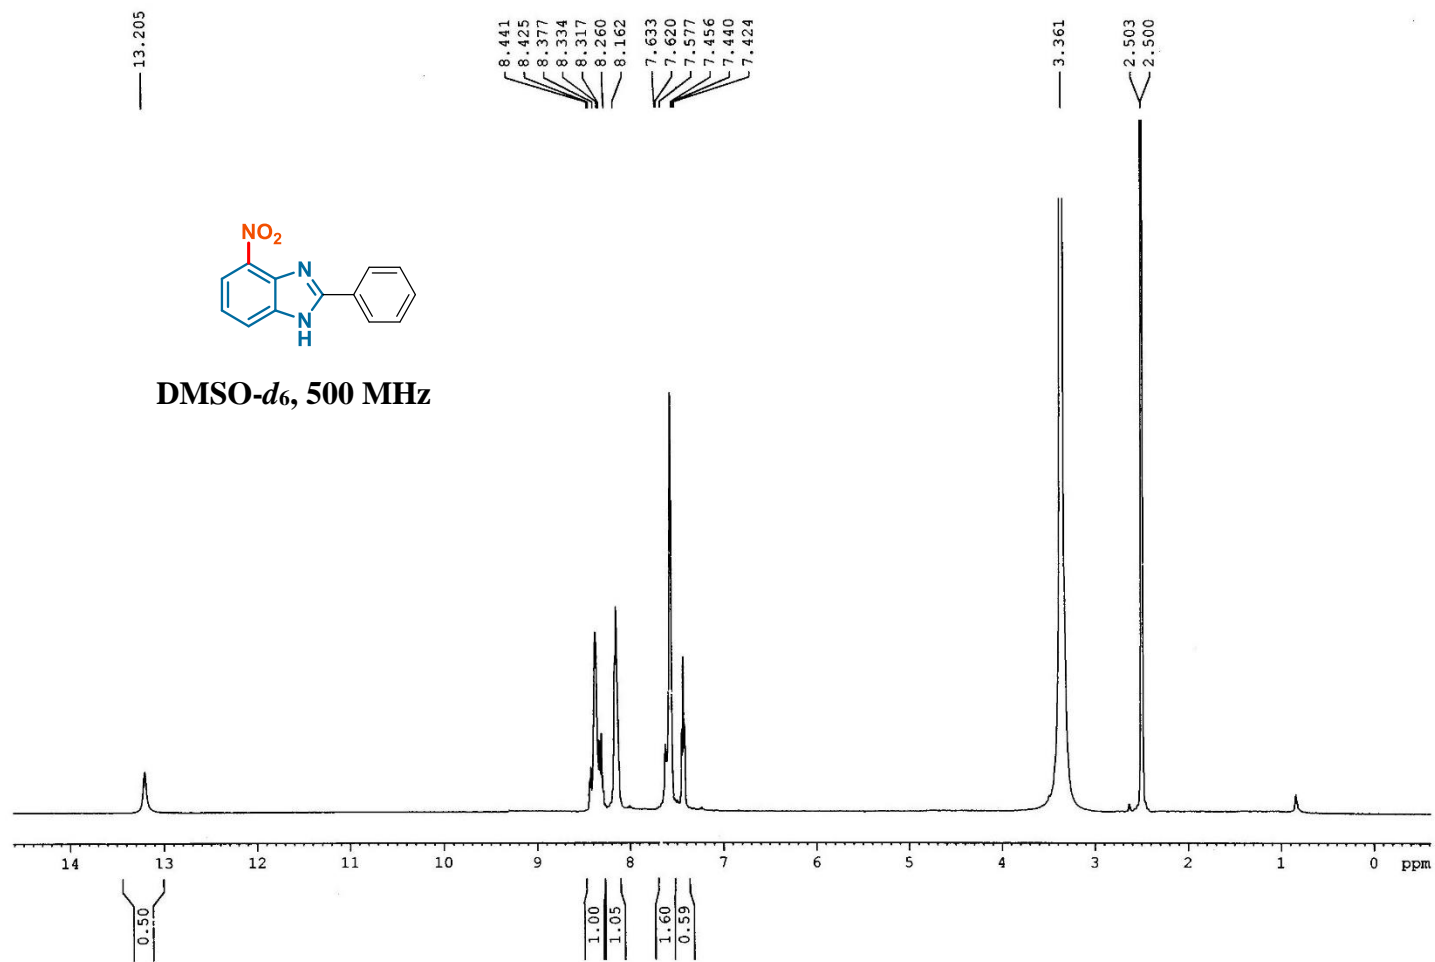

# $^{13}\text{C}$ NMR of compound 5q

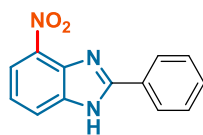

$\text{CDCl}_3$ , 100 MHz

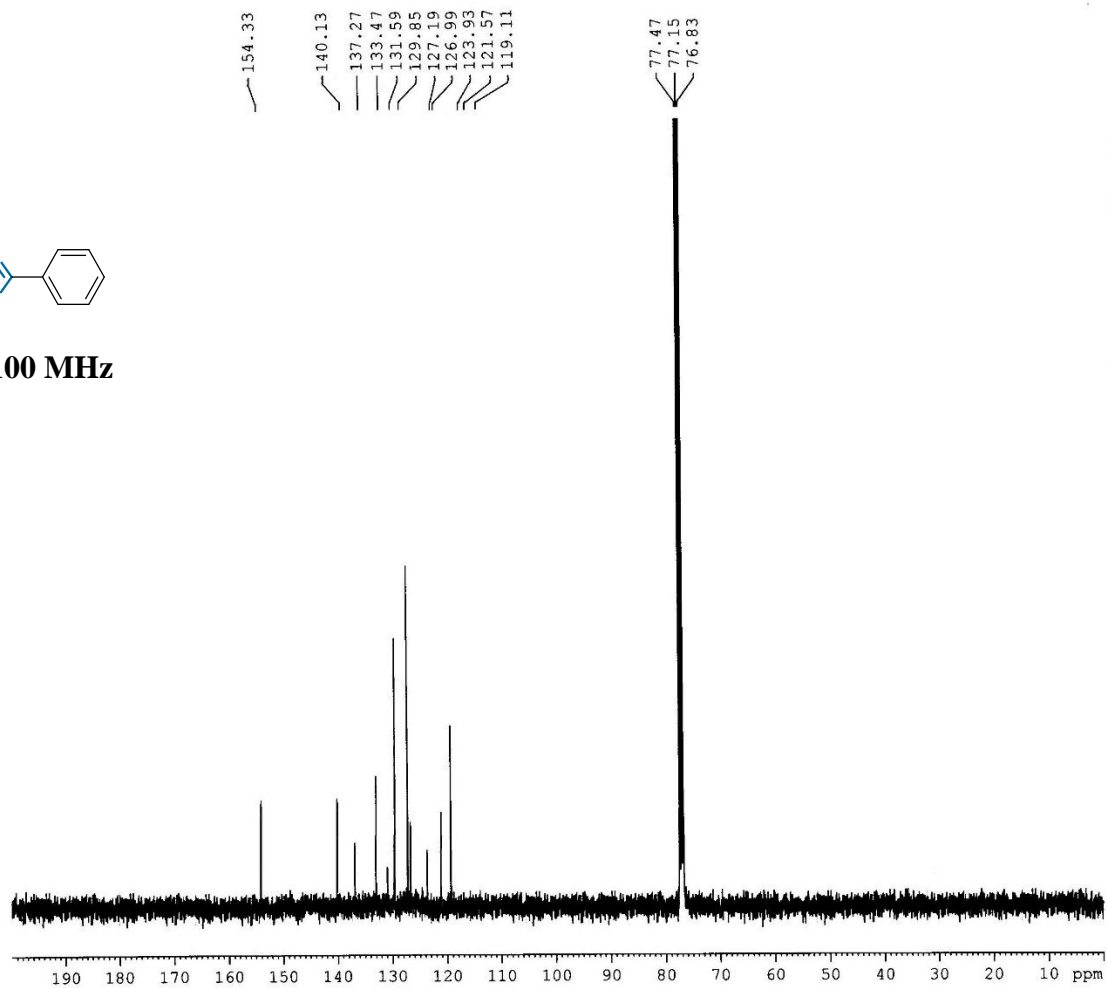

# Mass spectrum of RM-1

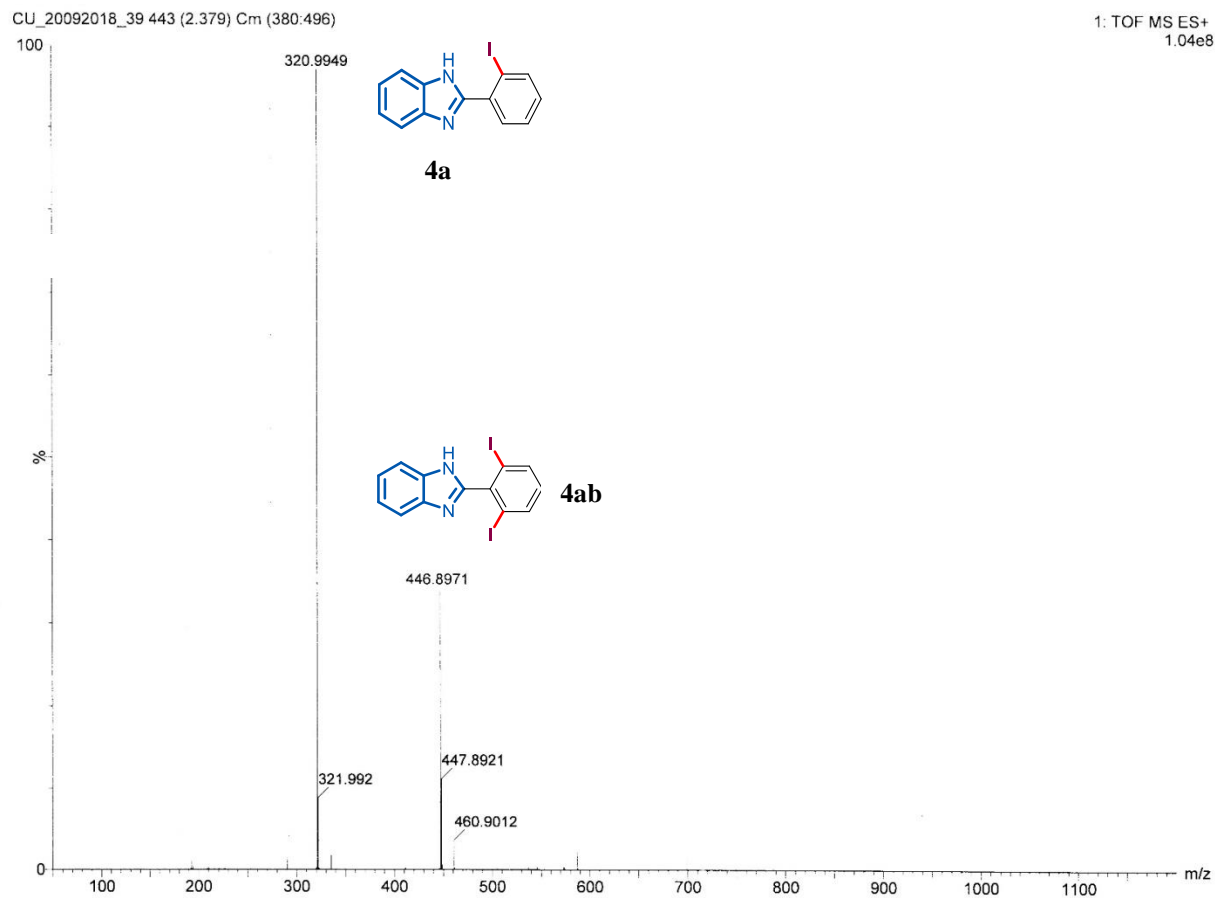

# Mass spectrum of Compound 2e

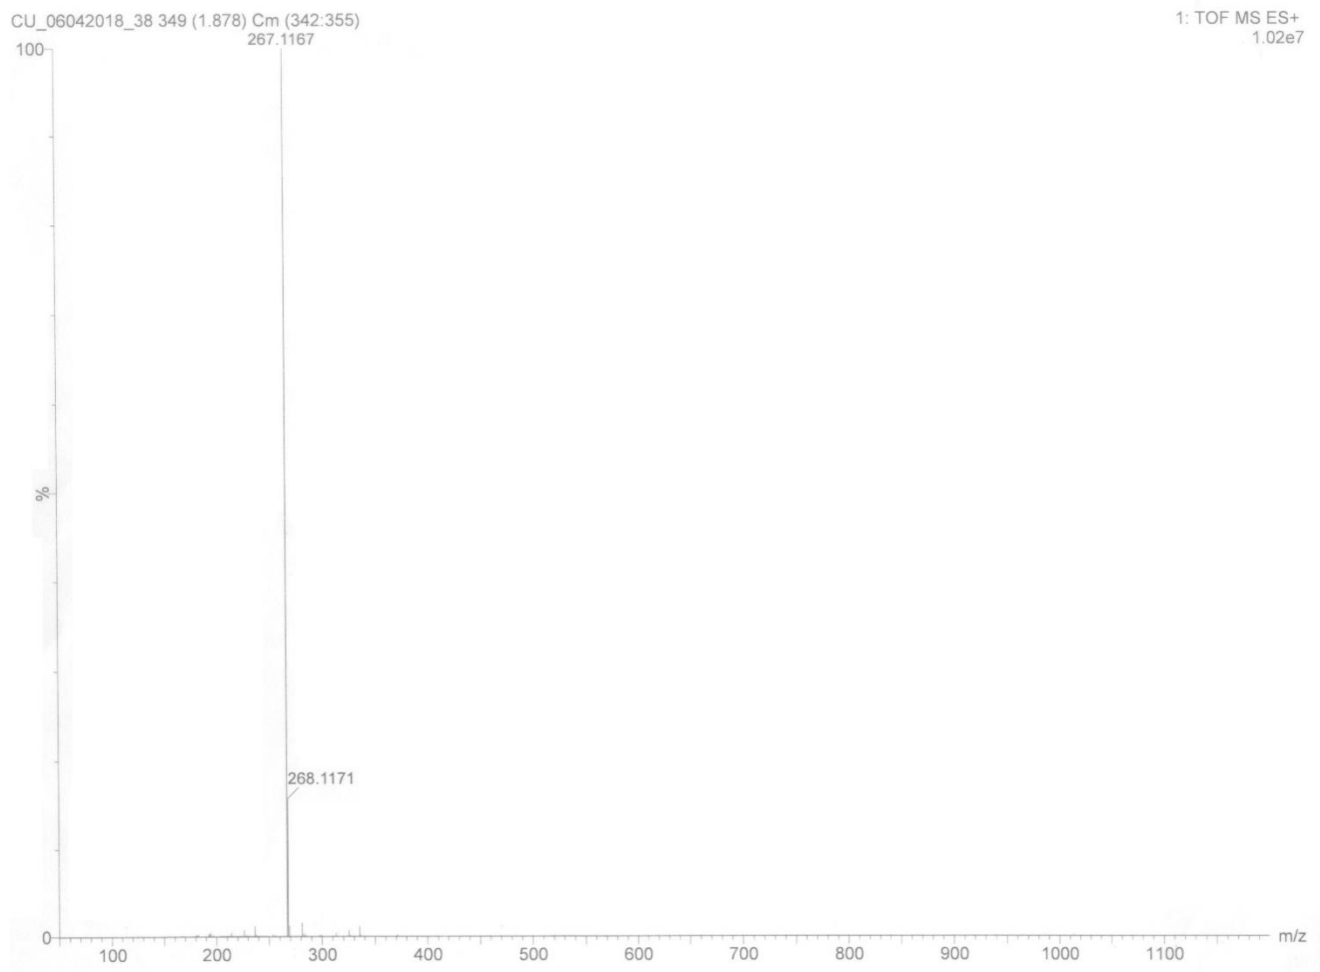

# Mass spectrum of Compound 2f

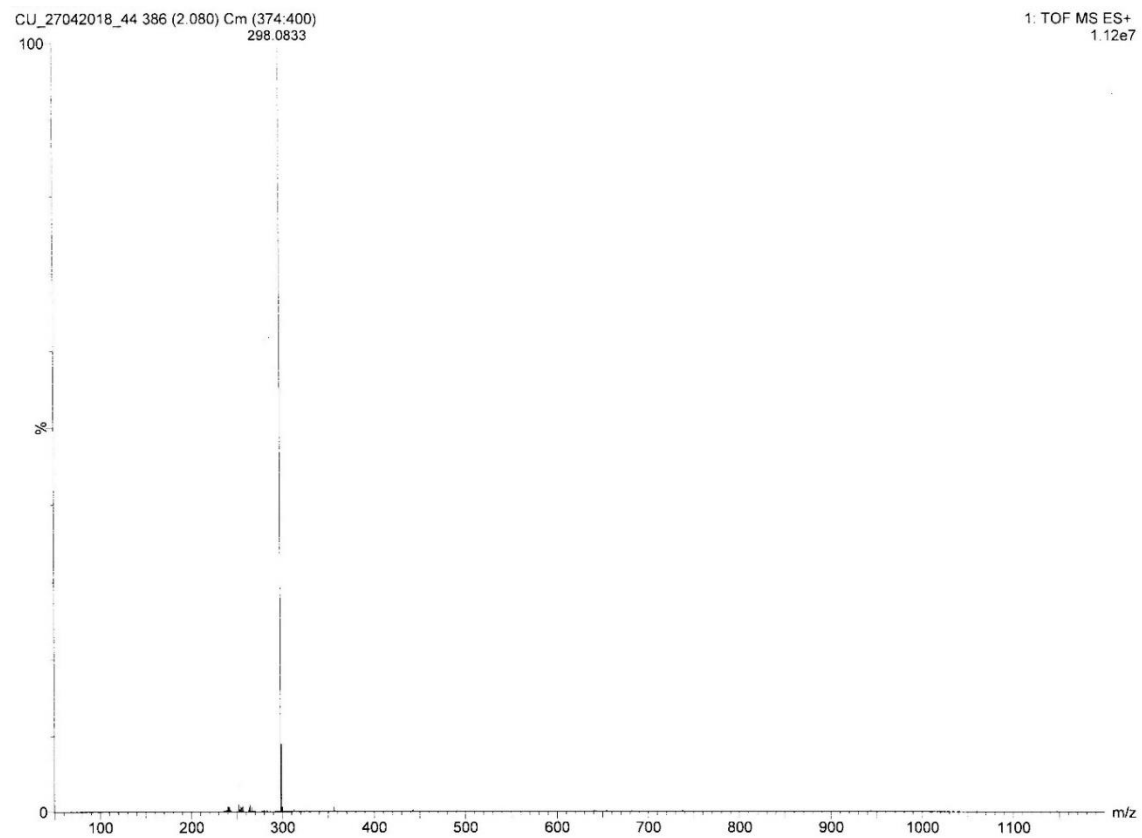



# Mass spectrum of Compound 2i

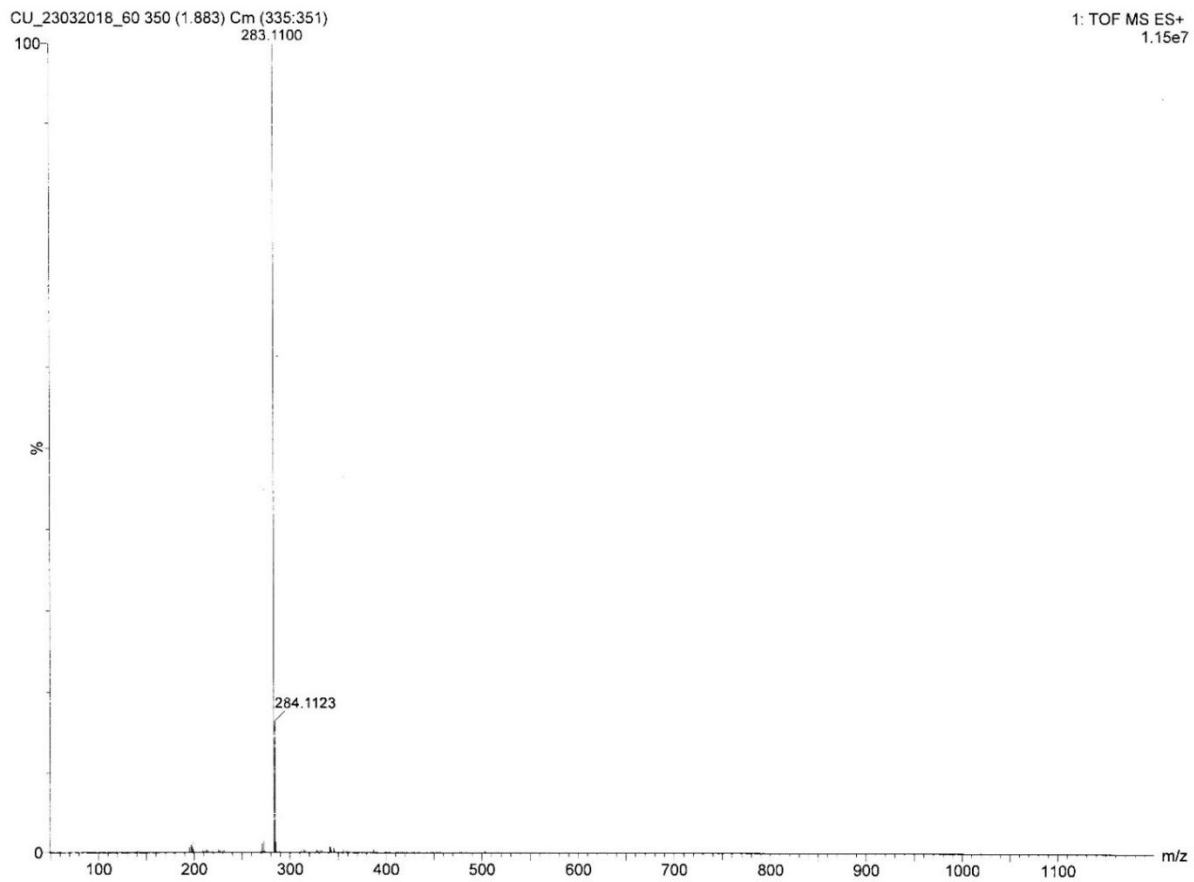

# Mass spectrum of Compound 2j

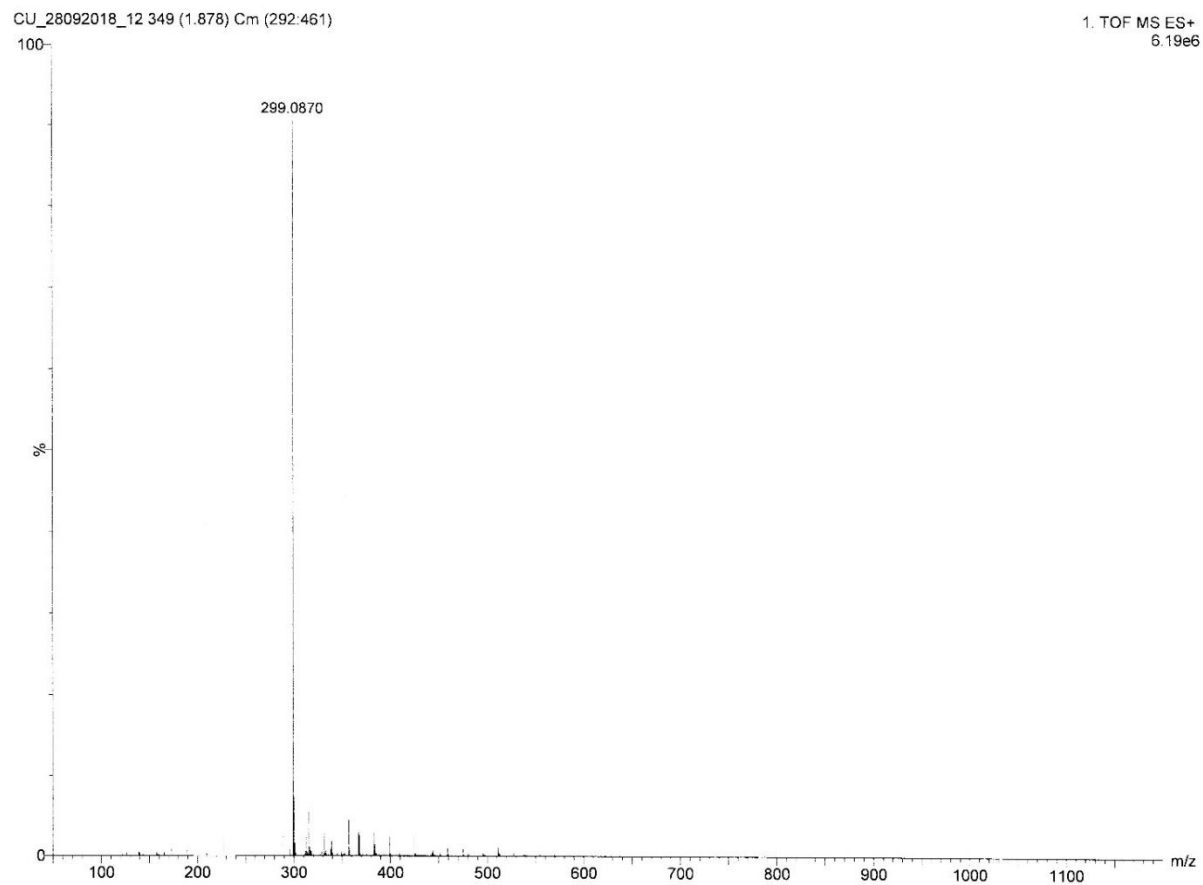

# Mass spectrum of Compound 2k

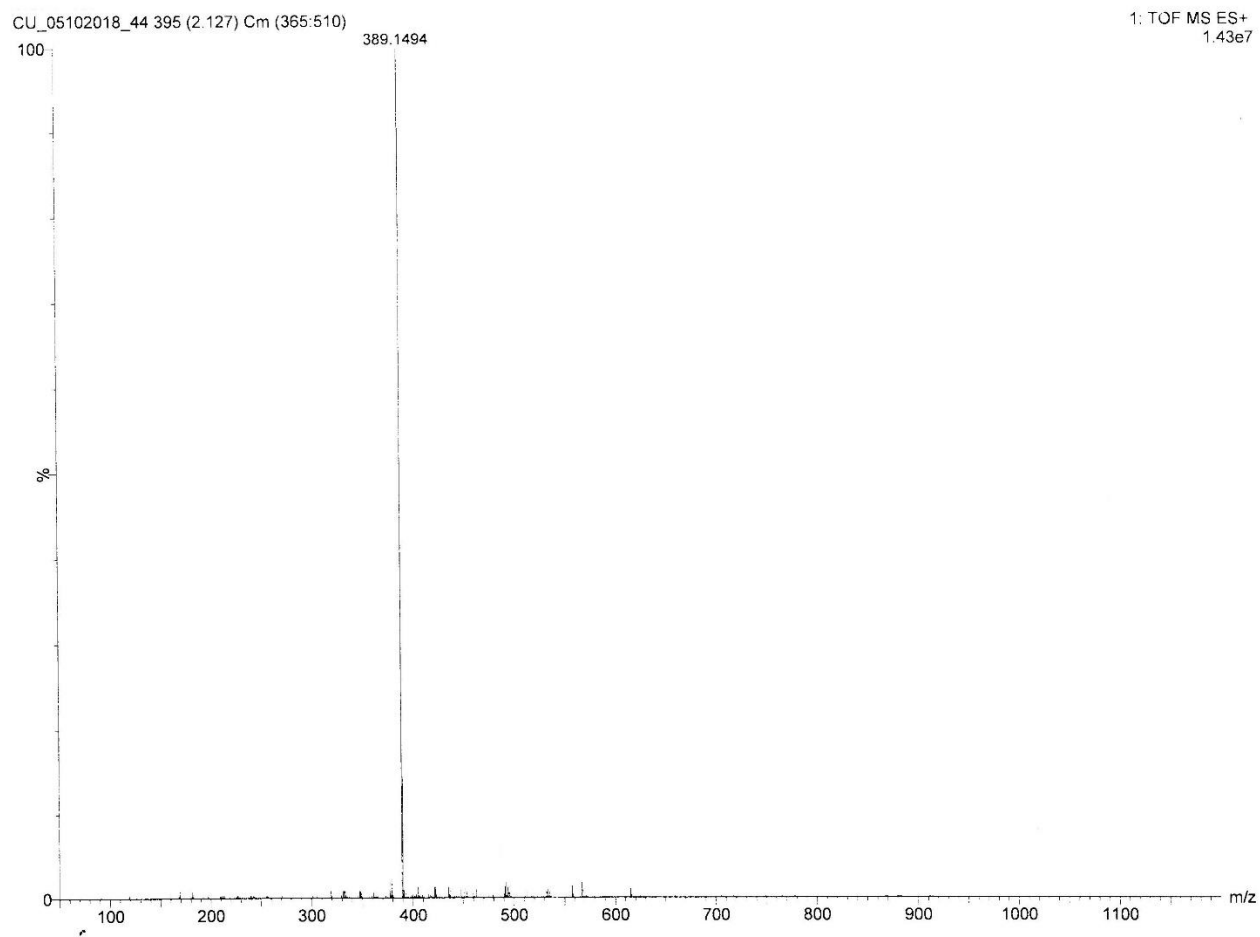

# Mass spectrum of Compound 2m

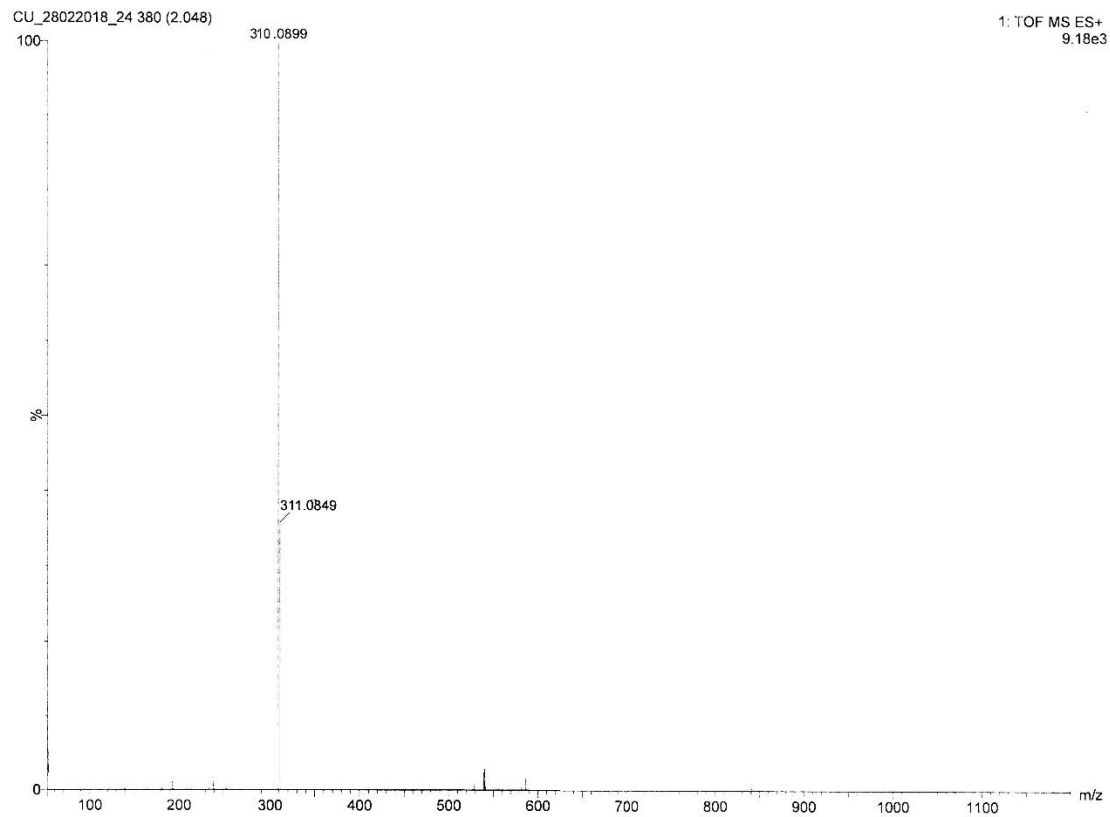

# Mass spectrum of Compound 3a

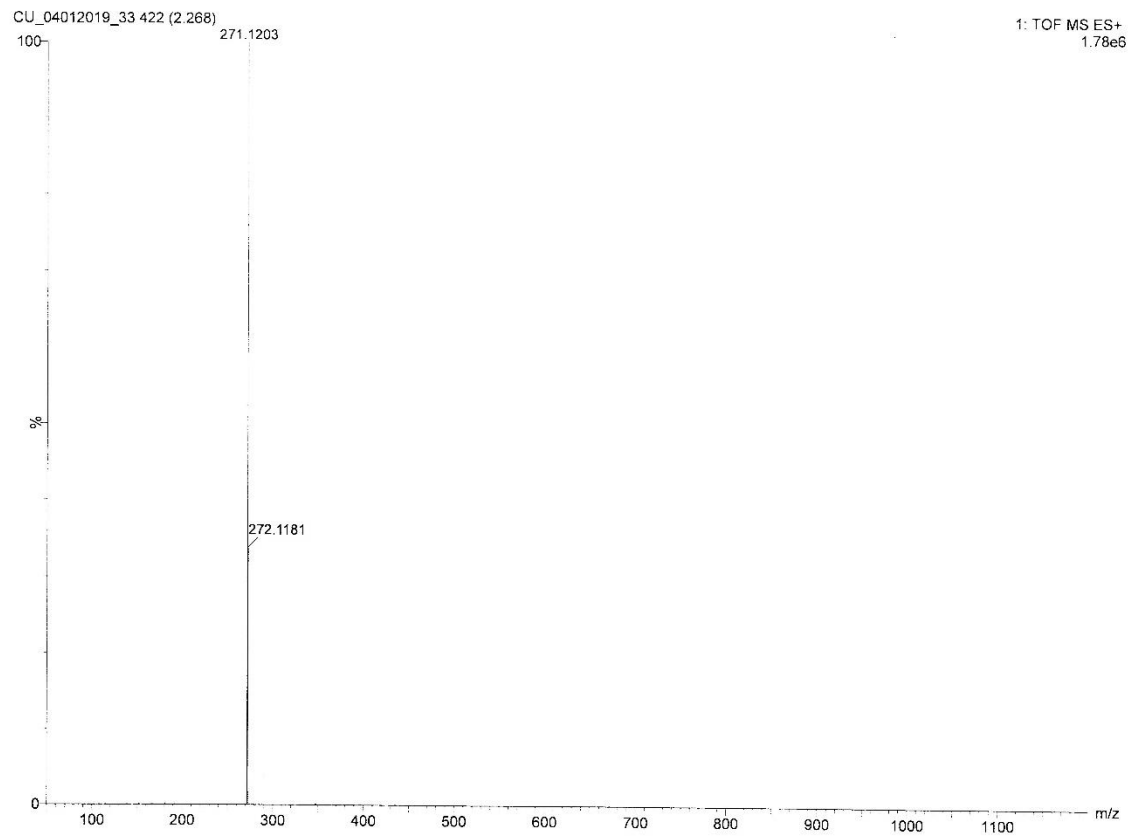

# Mass spectrum of Compound 3c

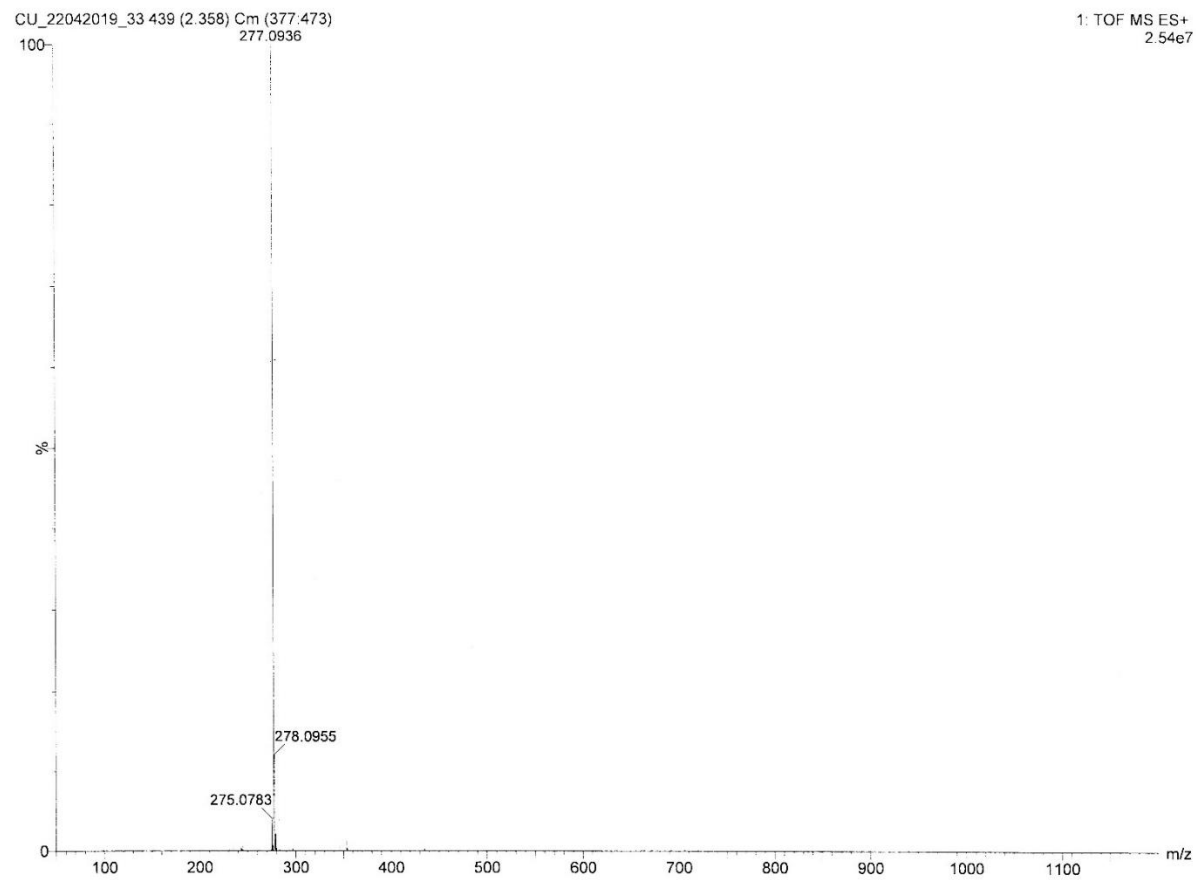

# Mass spectrum of Compound 4h

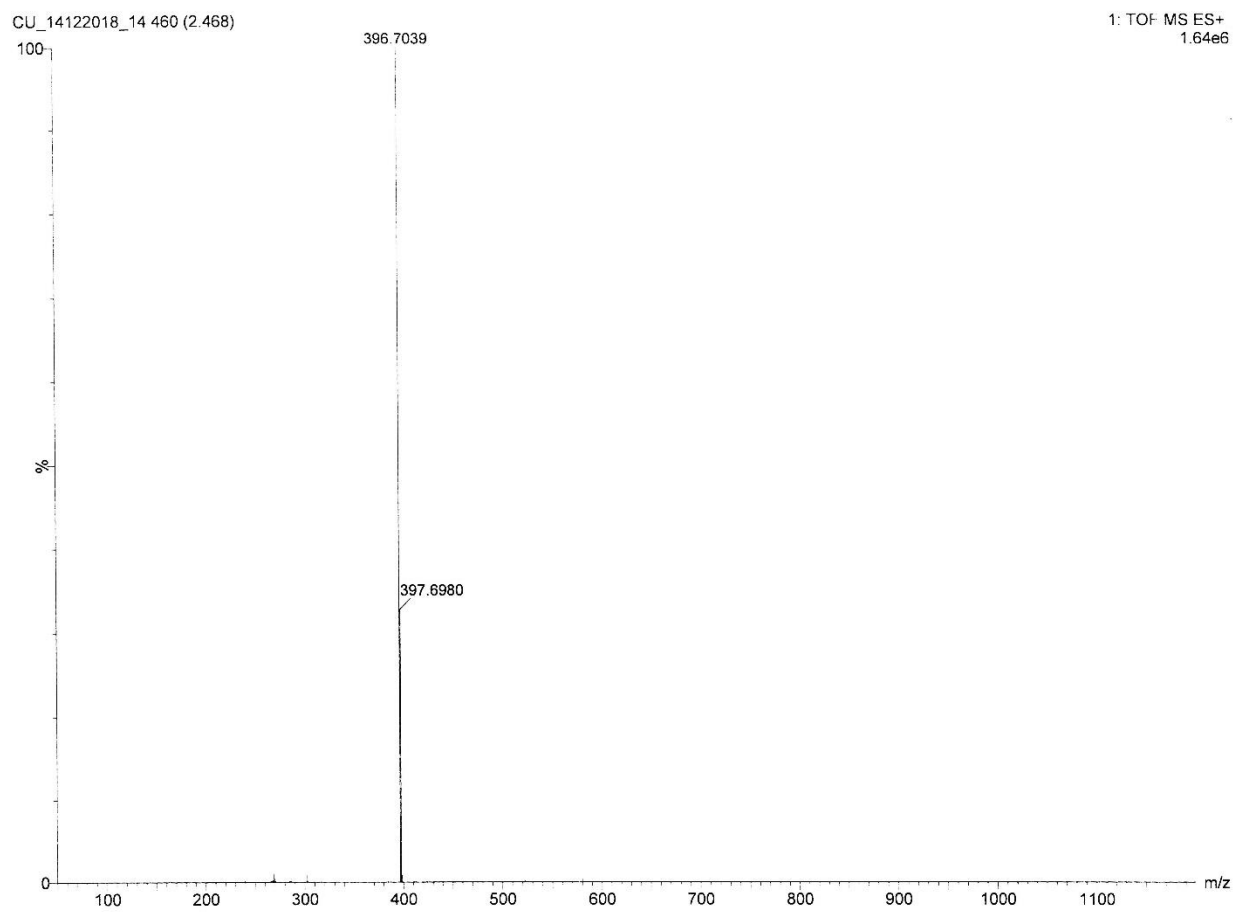

# Mass spectrum of Compound 4i

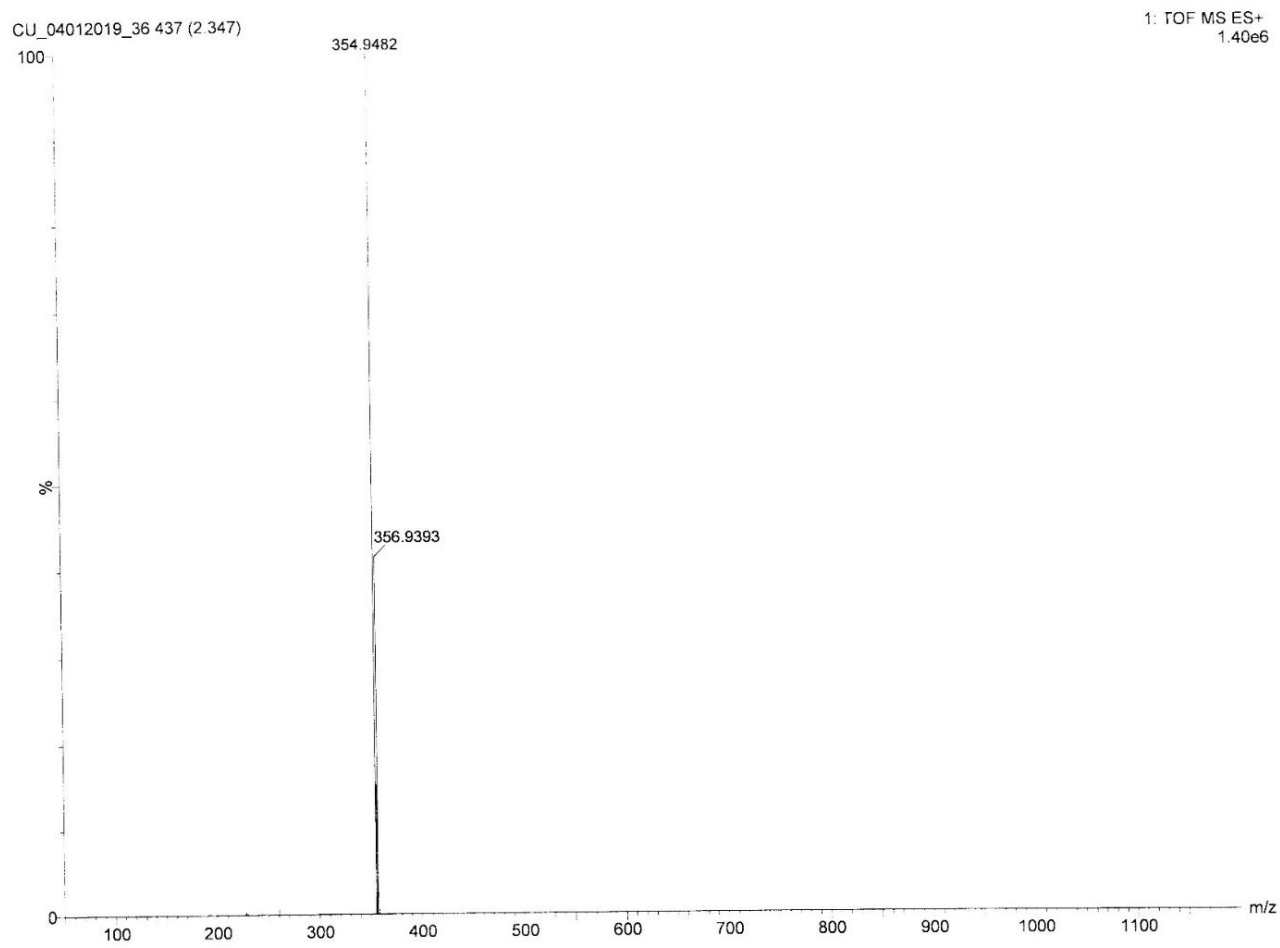



# Mass spectrum of Compound 4k

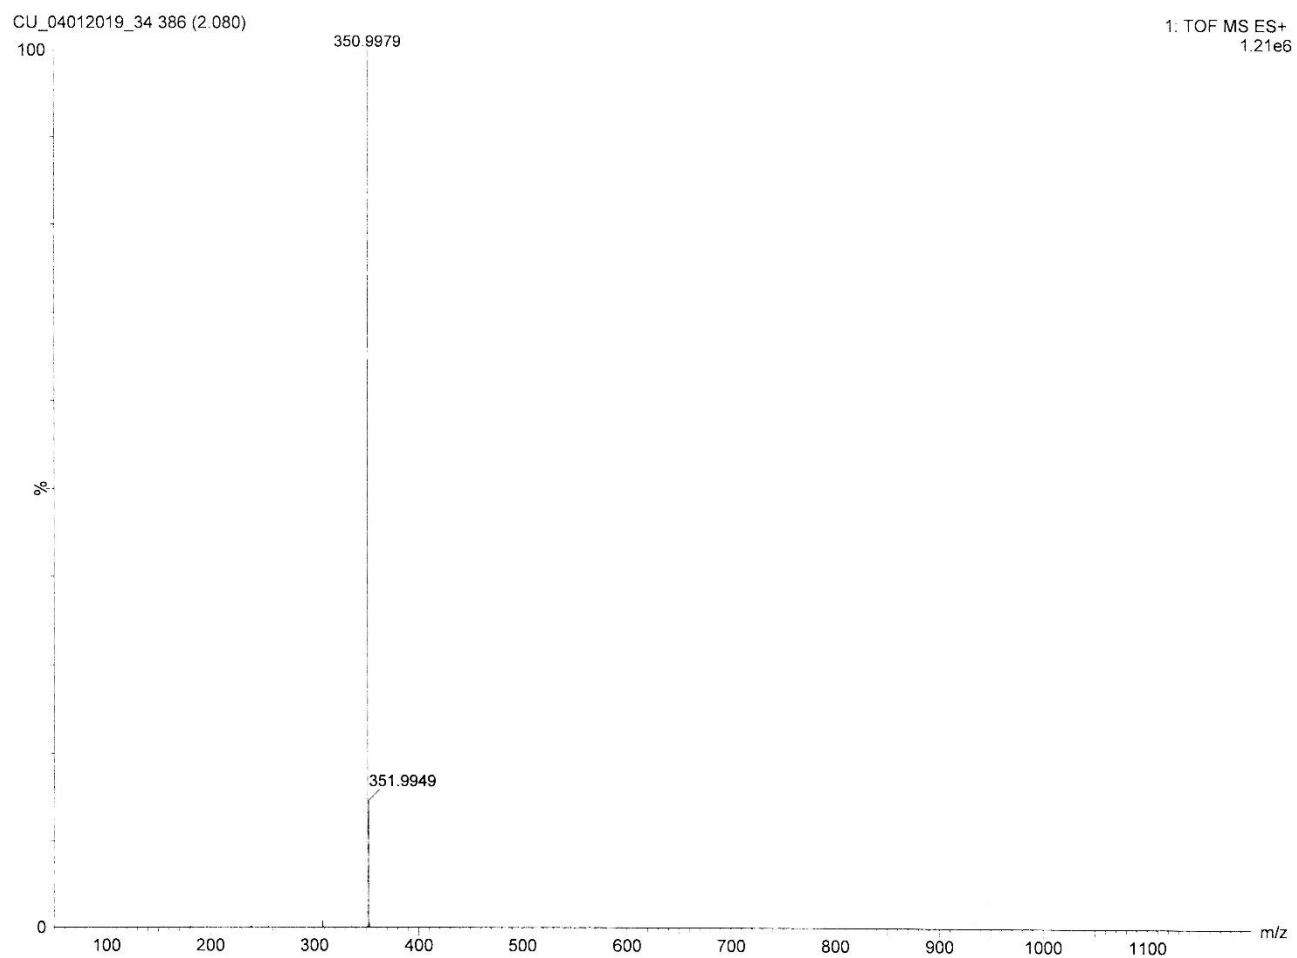

## Mass spectrum of Compound 4m

CU\_22042019\_31 651 (3.484) Cm (615-685)

1: TOF MS ES+  
1.43e7

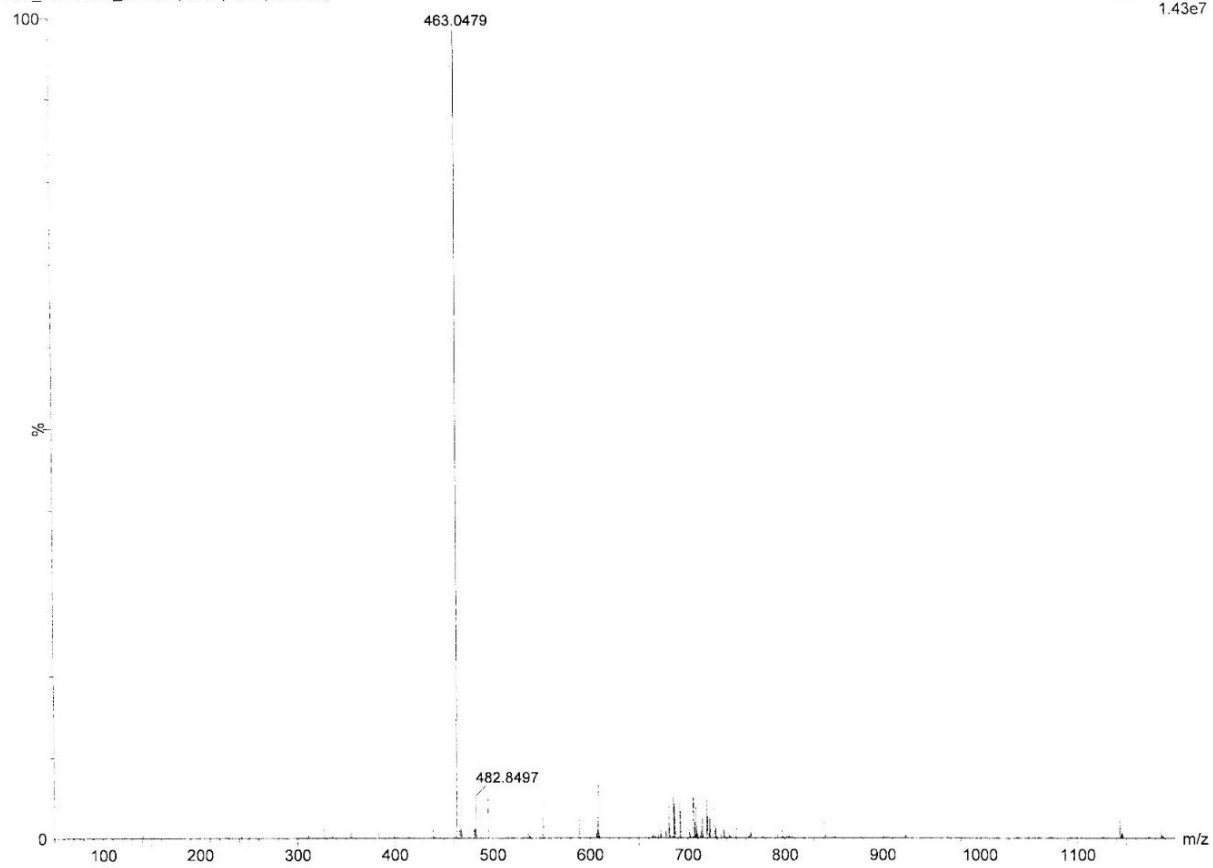

# Mass spectrum of Compound 4n

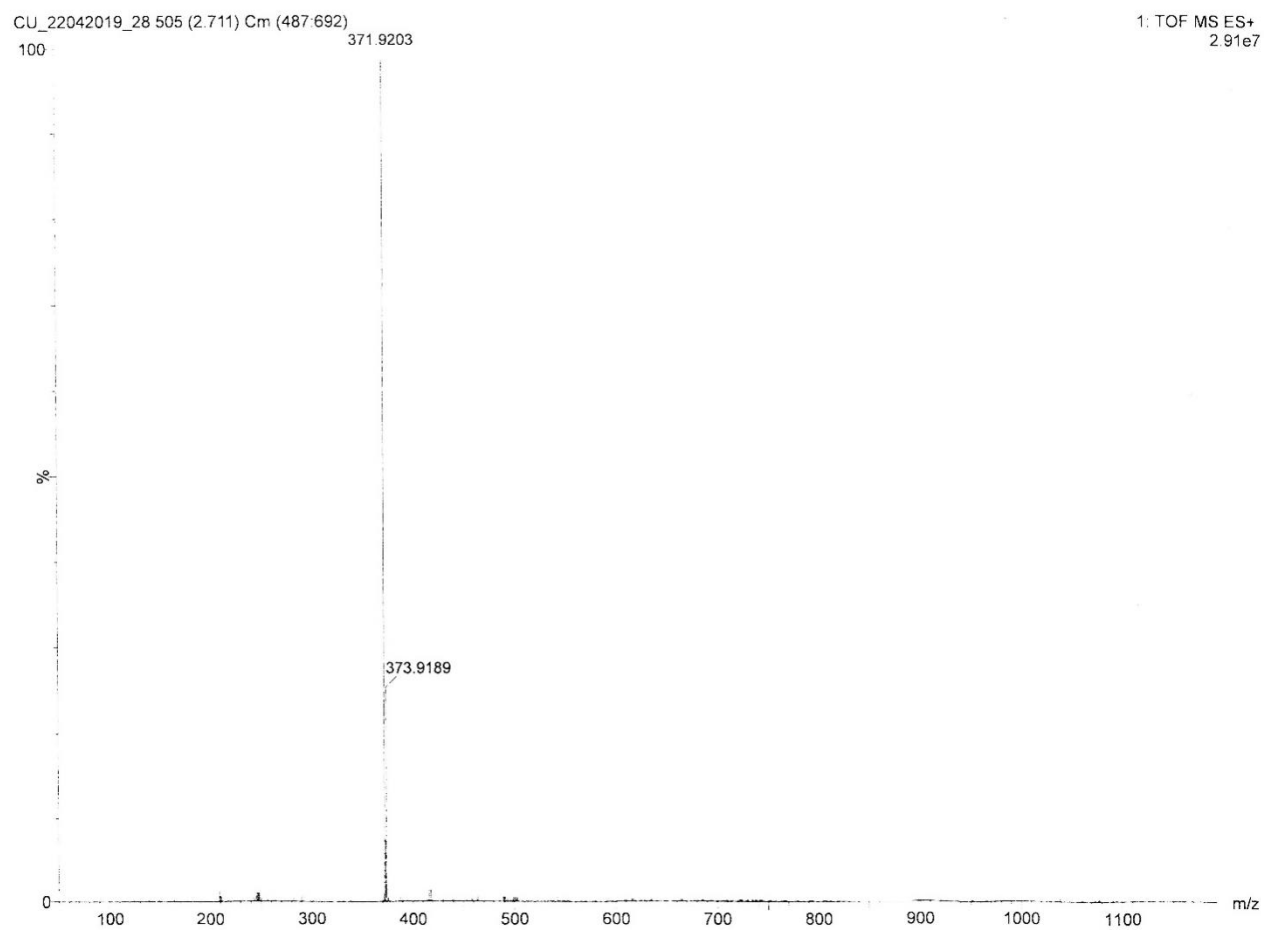

# Mass spectrum of Compound 4r

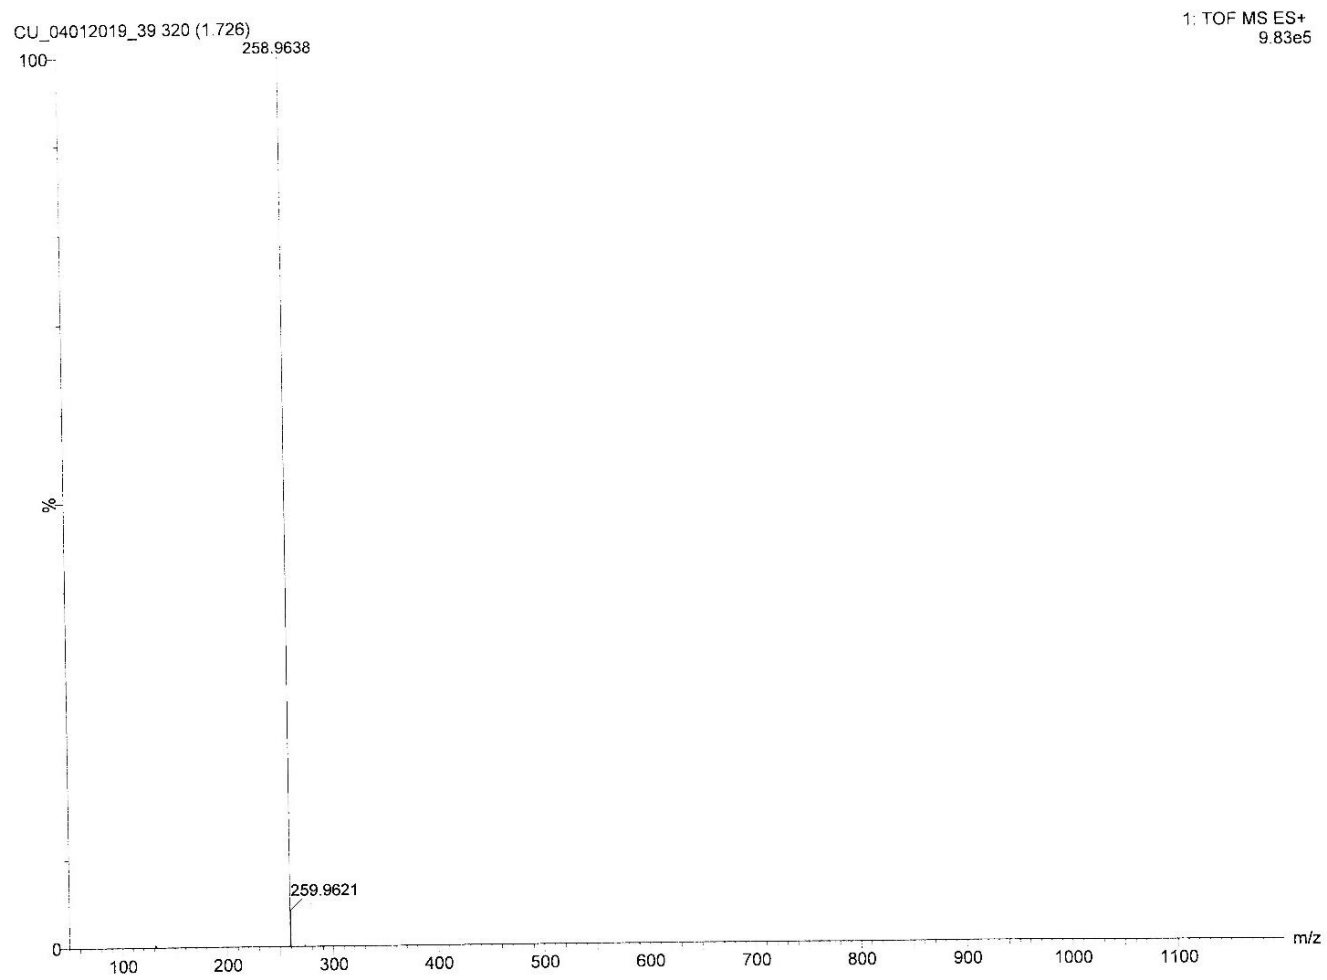

# Mass spectrum of Compound 5a

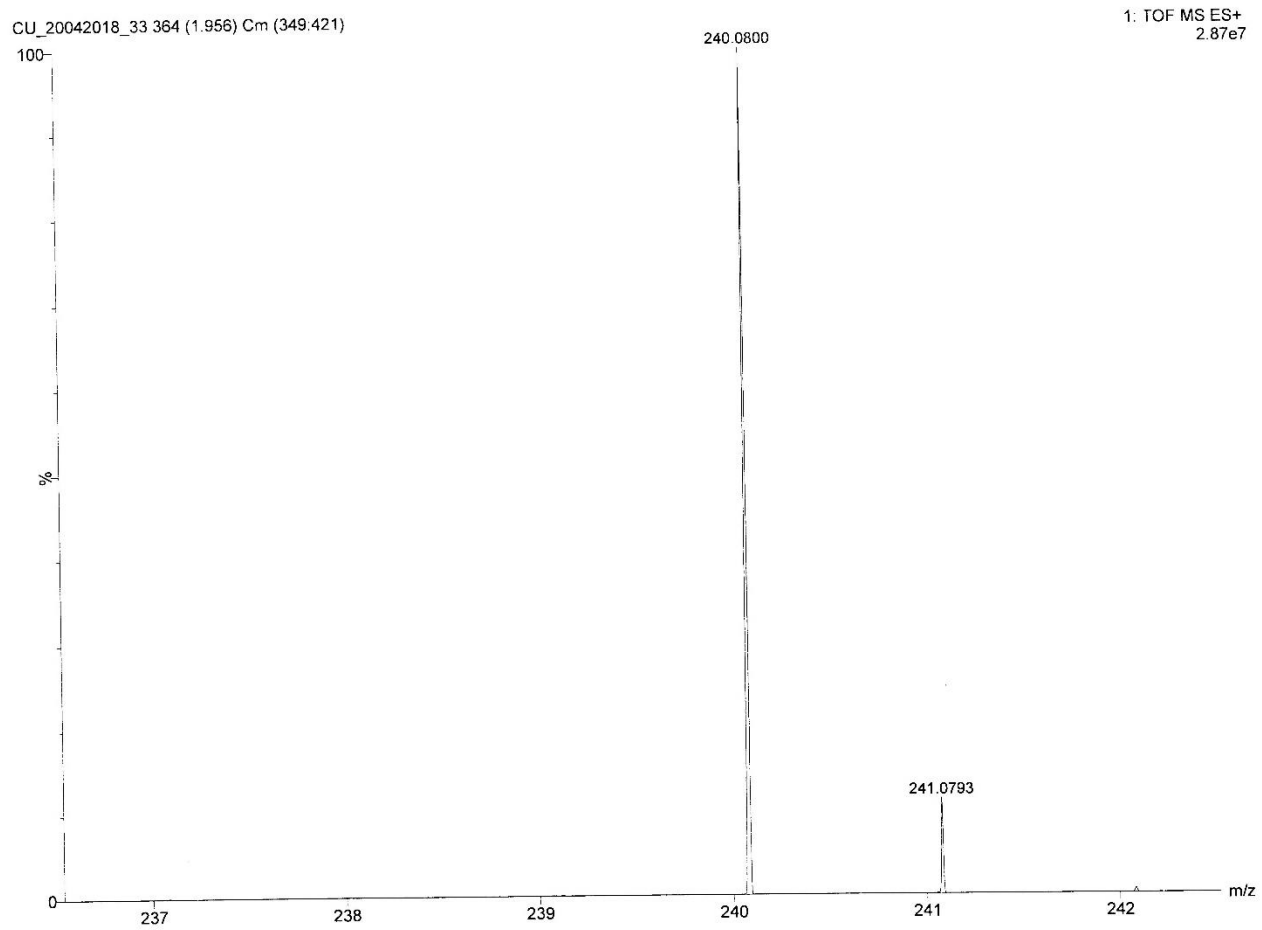

# Mass spectrum of Compound 5b

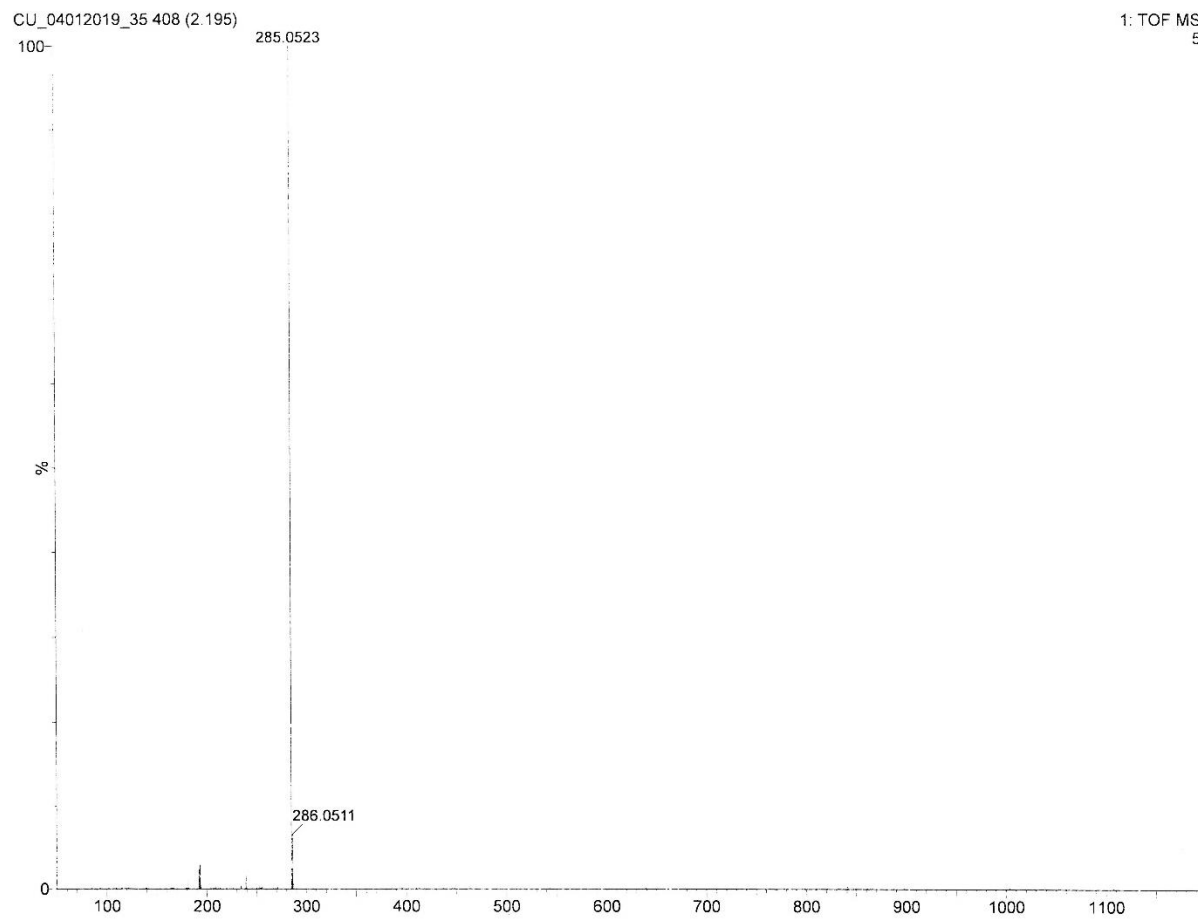

# Mass spectrum of Compound 5e

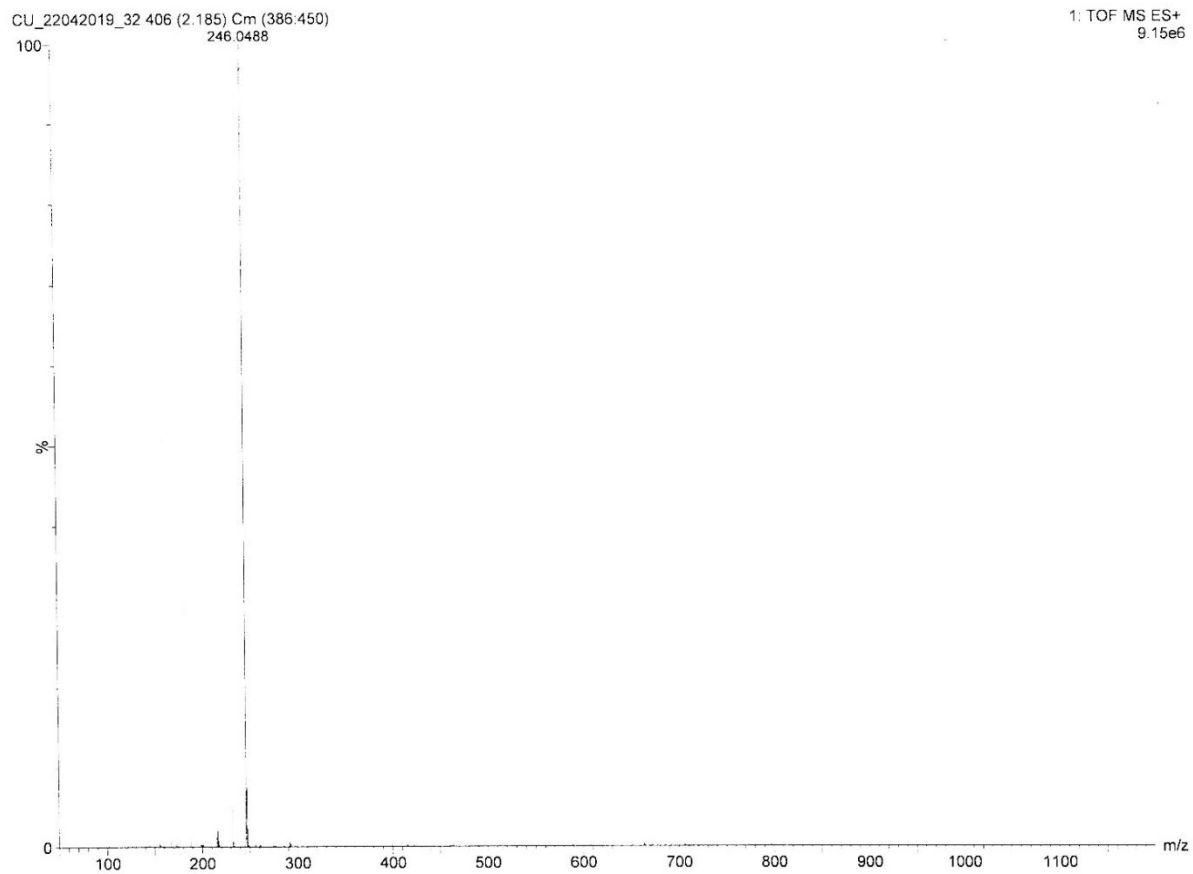



# Mass spectrum of Compound 5k

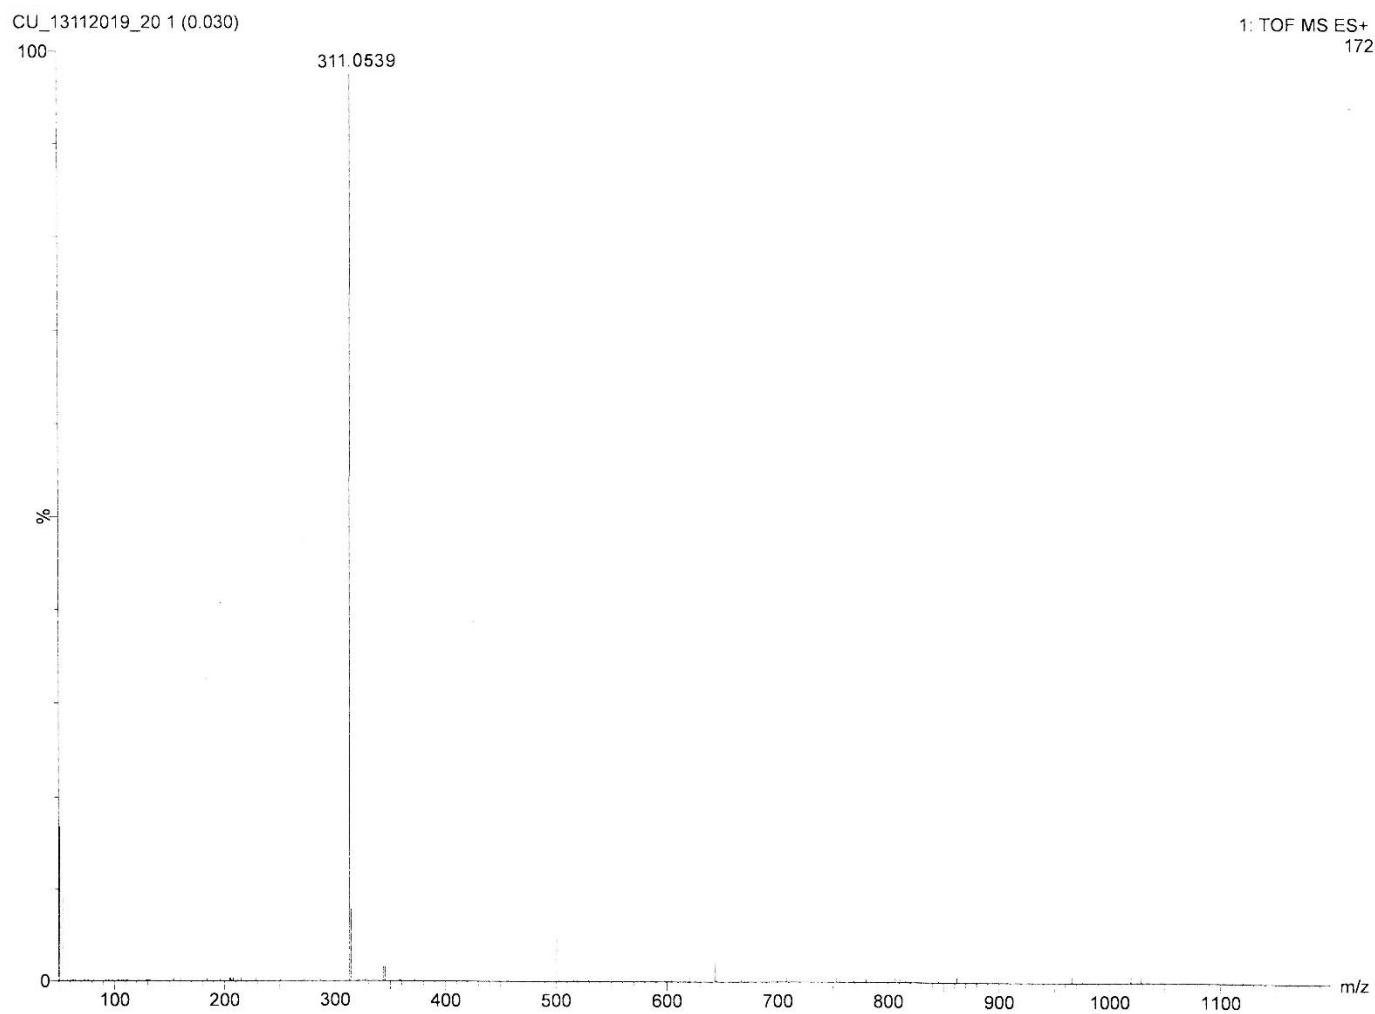

# Mass spectrum of Compound 5p

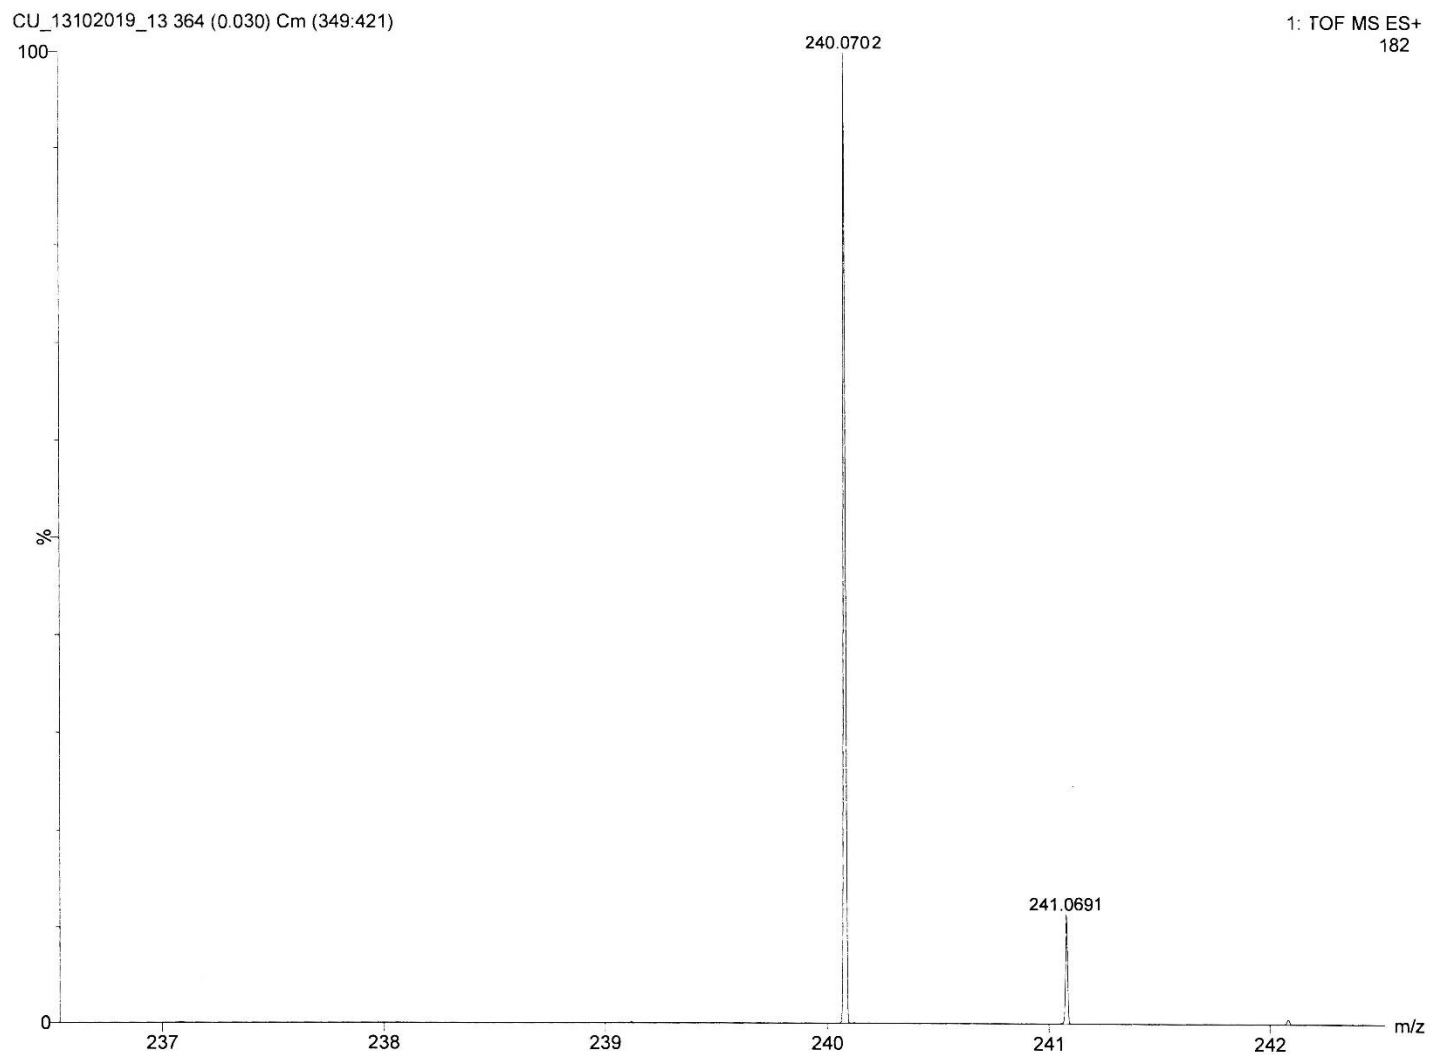

Supplement: c9ob02533b1.pdf [file c9ob02533b1.pdf]
